# Supplementary material for: MicroRNA-eQTLs in the developing human neocortex link miR-4707-3p expression to brain size
Source: bioRxiv preprint, doi:10.1101/2022.03.31.486585, version 2 (2023-01-09)
Supplement: Supplementary File 6 [file 486585_file08.xlsx]

## Sheet: Expression in Week1
PROBEID	SYMBOL	GENENAME	ENSEMBL	ENTREZID	duplicate.annotation	logFC	AveExpr	t	P.Value	adj.P.Val	B
TC0600007244.hg.1	SCGN	secretagogin, EF-hand calcium binding protein	ENSG00000079689	10590	FALSE	1.65947	8.25469	26.1134	2.42375e-17	4.15115e-13	28.4504
TC0800007051.hg.1	NEFM	neurofilament medium chain	ENSG00000104722	4741	FALSE	-1.83867	7.50046	-20.2404	3.93163e-15	3.36685e-11	24.1904
TC0600011517.hg.1	HLA-DPA1	major histocompatibility complex, class II, DP alpha 1	ENSG00000231389	3113	TRUE	-1.61832	6.61134	-19.0755	1.26538e-14	7.22407e-11	23.1579
TC0200015000.hg.1	CHRNA1	cholinergic receptor nicotinic alpha 1 subunit	ENSG00000138435	1134	FALSE	-1.86083	5.8732	-18.2738	2.93796e-14	1.25796e-10	22.4032
TC0100010188.hg.1	BCAN	brevican	ENSG00000132692	63827	FALSE	1.17853	8.75337	17.4394	7.31541e-14	2.39495e-10	21.5765
TC2000007448.hg.1	GDAP1L1	ganglioside induced differentiation associated protein 1 like 1	ENSG00000124194	78997	FALSE	1.26711	8.16098	17.1751	9.84477e-14	2.39495e-10	21.3054
TC0600007650.hg.1	HLA-DRA	major histocompatibility complex, class II, DR alpha	ENSG00000204287	3122	TRUE	-1.8037	6.51278	-17.0861	1.08892e-13	2.39495e-10	21.2131
TC0800008679.hg.1	COL14A1	collagen type XIV alpha 1 chain	ENSG00000187955	7373	FALSE	-2.85844	5.79898	-17.012	1.18487e-13	2.39495e-10	21.1357
TC0500008736.hg.1	TGFBI	transforming growth factor beta induced	ENSG00000120708	7045	FALSE	-2.19654	5.37808	-16.9592	1.25851e-13	2.39495e-10	21.0804
TC0600014277.hg.1	HLA-DMA	major histocompatibility complex, class II, DM alpha	ENSG00000204257	3108	TRUE	-1.37321	7.53248	-16.2929	2.73269e-13	4.29444e-10	20.3662
TC0300013849.hg.1	ROBO2	roundabout guidance receptor 2	ENSG00000185008	6092	FALSE	1.16315	8.51996	16.2851	2.75815e-13	4.29444e-10	20.3577
TC1000012169.hg.1	ADAM12	ADAM metallopeptidase domain 12	ENSG00000148848	8038	FALSE	-1.54832	7.20504	-16.1592	3.20337e-13	4.57201e-10	20.2191
TC2200006945.hg.1	SEZ6L	seizure related 6 homolog like	ENSG00000100095	23544	FALSE	1.30148	9.12223	15.5131	7.01632e-13	9.24373e-10	19.4897
TC0300011172.hg.1	TNNC1	troponin C1, slow skeletal and cardiac type	ENSG00000114854	7134	FALSE	-1.25744	8.1621	-15.1932	1.04523e-12	1.27869e-09	19.1167
TC0300012212.hg.1	MYLK	myosin light chain kinase	ENSG00000065534	4638	FALSE	-1.3079	7.74443	-15.0899	1.19056e-12	1.35938e-09	18.9946
TC0200015266.hg.1	TMEFF2	transmembrane protein with EGF like and two follistatin like domains 2	ENSG00000144339	23671	FALSE	-1.00423	8.72248	-14.9369	1.44585e-12	1.54769e-09	18.8121
TC0200009739.hg.1	GALNT5	polypeptide N-acetylgalactosaminyltransferase 5	ENSG00000136542	11227	FALSE	-1.21485	6.62239	-14.0856	4.39623e-12	4.41236e-09	17.7612
TC0100015805.hg.1	CELF3	CUGBP Elav-like family member 3	ENSG00000159409	11189	FALSE	1.52331	7.86064	14.0458	4.63726e-12	4.41236e-09	17.7105
TC1800008804.hg.1	ALPK2	alpha kinase 2	ENSG00000198796	115701	FALSE	-1.04823	8.15389	-14.0054	4.89601e-12	4.41337e-09	17.6589
TC0700010965.hg.1	IGFBP3	insulin like growth factor binding protein 3	ENSG00000146674	3486	FALSE	-0.838719	9.28396	-13.9635	5.1799e-12	4.43581e-09	17.6053
TC1600011186.hg.1	SLC7A5	solute carrier family 7 member 5	ENSG00000103257	8140	FALSE	-1.27336	8.18184	-13.4927	9.85941e-12	7.80544e-09	16.9919
TC0600014273.hg.1	HLA-DRB1	major histocompatibility complex, class II, DR beta 1	ENSG00000196126	3123	TRUE	-1.45424	5.69306	-13.4806	1.00262e-11	7.80544e-09	16.9758
TC1900011542.hg.1	PEG3	paternally expressed 3	ENSG00000198300	5178	TRUE	0.862391	8.48214	13.1051	1.69798e-11	1.22258e-08	16.4714
TC0100013272.hg.1	HTR1D	5-hydroxytryptamine receptor 1D	ENSG00000179546	3352	FALSE	-1.29797	6.33897	-13.0988	1.7132e-11	1.22258e-08	16.4628
TC1400008615.hg.1	NDRG2	NDRG family member 2	ENSG00000165795	57447	TRUE	1.01115	7.87295	13.0285	1.89335e-11	1.28782e-08	16.3669
TC0200014361.hg.1	LYPD1	LY6/PLAUR domain containing 1	ENSG00000150551	116372	FALSE	-0.793012	8.48687	-13.006	1.955e-11	1.28782e-08	16.3361
TC0600008146.hg.1	RUNX2	RUNX family transcription factor 2	ENSG00000124813	860	FALSE	-1.031	8.05101	-12.9517	2.11305e-11	1.34038e-08	16.2614
TC1400009738.hg.1	TGFB3	transforming growth factor beta 3	ENSG00000119699	7043	FALSE	-1.02945	6.96908	-12.8327	2.50716e-11	1.51909e-08	16.097
TC0500012470.hg.1	CD74	CD74 molecule	ENSG00000019582	972	FALSE	-1.40146	7.69652	-12.815	2.57218e-11	1.51909e-08	16.0724
TC0400009110.hg.1	GRIA2	glutamate ionotropic receptor AMPA type subunit 2	ENSG00000120251	2891	FALSE	0.93485	9.43093	12.6279	3.37534e-11	1.91567e-08	15.8107
TC0500012599.hg.1	ADAM19	ADAM metallopeptidase domain 19	ENSG00000135074	8728	FALSE	-0.771381	6.55038	-12.6095	3.46738e-11	1.91567e-08	15.7848
TC1700008263.hg.1	ABCC3	ATP binding cassette subfamily C member 3	ENSG00000108846	8714	FALSE	-1.43982	7.73757	-12.5611	3.72219e-11	1.95601e-08	15.7164
TC0X00007767.hg.1	POU3F4	POU class 3 homeobox 4	ENSG00000196767	5456	FALSE	0.895143	7.55696	12.5468	3.80078e-11	1.95601e-08	15.6963
TC0X00010516.hg.1	DCX	doublecortin	ENSG00000077279	1641	FALSE	0.629065	10.9012	12.5139	3.9893e-11	1.95601e-08	15.6496
TC1200007594.hg.1	ASIC1	acid sensing ion channel subunit 1	ENSG00000110881	41	FALSE	0.829141	7.97294	12.5125	3.99721e-11	1.95601e-08	15.6476
TC0200015650.hg.1	FN1	fibronectin 1	ENSG00000115414	2335	FALSE	-1.08569	7.64722	-12.3368	5.18426e-11	2.46641e-08	15.3965
TC0100015822.hg.1	S100A11	S100 calcium binding protein A11	ENSG00000163191	6282	FALSE	-1.04913	8.82725	-12.0282	8.24138e-11	3.78984e-08	14.9479
TC2100007176.hg.1	PCP4	Purkinje cell protein 4	ENSG00000183036	5121	FALSE	0.736939	10.1669	11.9998	8.6042e-11	3.78984e-08	14.9061
TC0100018306.hg.1	CADM3	cell adhesion molecule 3	ENSG00000162706	57863	FALSE	0.8144	8.42623	11.9979	8.62986e-11	3.78984e-08	14.9032
TC0X00010734.hg.1	TENM1	teneurin transmembrane protein 1	ENSG00000009694	10178	FALSE	0.893154	7.6602	11.9161	9.77494e-11	4.18538e-08	14.7824
TC0100018556.hg.1	BLACAT1	BLACAT1 overlapping LEMD1 locus	ENSG00000281406	101669762	FALSE	1.1067	6.31494	11.7765	1.211e-10	5.05874e-08	14.5744
TC1800007340.hg.1	DCC	DCC netrin 1 receptor	ENSG00000187323	1630	FALSE	0.862539	7.00838	11.7302	1.3007e-10	5.29994e-08	14.505
TC1200007596.hg.1	GPD1	glycerol-3-phosphate dehydrogenase 1	ENSG00000167588	2819	FALSE	0.831599	7.8289	11.7066	1.34904e-10	5.29994e-08	14.4695
TC0100018555.hg.1	LEMD1	LEM domain containing 1	ENSG00000186007	93273	FALSE	0.965648	8.06495	11.7007	1.36158e-10	5.29994e-08	14.4605
TC1500009636.hg.1	ANXA2	annexin A2	ENSG00000182718	302	FALSE	-0.686771	9.66442	-11.635	1.50771e-10	5.73833e-08	14.3614
TC0700008582.hg.1	SERPINE1	serpin family E member 1	ENSG00000106366	5054	FALSE	-0.713039	7.25386	-11.4825	1.91357e-10	7.1247e-08	14.1293
TC1400010390.hg.1	AHNAK2	AHNAK nucleoprotein 2	ENSG00000185567	113146	FALSE	-0.831288	8.14701	-11.3641	2.30639e-10	8.40459e-08	13.9474
TC0X00008125.hg.1	PAK3	p21 (RAC1) activated kinase 3	ENSG00000077264	5063	FALSE	0.937142	8.80943	11.3269	2.4464e-10	8.72904e-08	13.8899
TC0400007799.hg.1	SLC4A4	solute carrier family 4 member 4	ENSG00000080493	8671	FALSE	0.781451	7.79484	11.1455	3.26781e-10	1.1422e-07	13.6074
TC2000009809.hg.1	KCNQ2	potassium voltage-gated channel subfamily Q member 2	ENSG00000075043	3785	TRUE	0.654289	9.86506	11.0385	3.88263e-10	1.31815e-07	13.4389
TC0900009127.hg.1	COL5A1	collagen type V alpha 1 chain	ENSG00000130635	1289	FALSE	-1.0618	6.85893	-11.0317	3.92513e-10	1.31815e-07	13.4283
TC0300012773.hg.1	TM4SF1	transmembrane 4 L six family member 1	ENSG00000169908	4071	FALSE	-1.28075	7.16542	-11.0015	4.12186e-10	1.3576e-07	13.3805
TC1000010132.hg.1	MKX	mohawk homeobox	ENSG00000150051	283078	FALSE	0.941268	6.49834	10.9863	4.22474e-10	1.36523e-07	13.3564
TC0100009837.hg.1	PDE4DIP	phosphodiesterase 4D interacting protein	ENSG00000178104	9659	TRUE	1.05806	6.85713	10.9613	4.39971e-10	1.39544e-07	13.3167
TC0900011220.hg.1	SUSD1	sushi domain containing 1	ENSG00000106868	64420	FALSE	-0.770879	9.20029	-10.9265	4.65628e-10	1.44997e-07	13.2612
TC1600008301.hg.1	CALB2	calbindin 2	ENSG00000172137	794	TRUE	0.527131	10.9446	10.8965	4.88945e-10	1.49539e-07	13.2134
TC2100008562.hg.1	RUNX1	RUNX family transcription factor 1	ENSG00000159216	861	FALSE	-0.90337	9.50502	-10.8346	5.41067e-10	1.62577e-07	13.1142
TC2000007251.hg.1	MYL9	myosin light chain 9	ENSG00000101335	10398	FALSE	-0.960539	7.99256	-10.7654	6.06154e-10	1.78993e-07	13.003
TC0300010632.hg.1	OSBPL10	oxysterol binding protein like 10	ENSG00000144645	114884	FALSE	-0.952499	7.30649	-10.6978	6.77732e-10	1.93652e-07	12.8936
TC0800010918.hg.1	ZNF704	zinc finger protein 704	ENSG00000164684	619279	FALSE	0.82364	7.89628	10.6972	6.78411e-10	1.93652e-07	12.8926
TC0600013186.hg.1	CCN2	cellular communication network factor 2	ENSG00000118523	1490	FALSE	-0.792812	7.72921	-10.6383	7.47931e-10	2.0971e-07	12.797
TC0800010138.hg.1	RAB11FIP1	RAB11 family interacting protein 1	ENSG00000156675	80223	FALSE	-0.849267	7.75734	-10.6293	7.59153e-10	2.0971e-07	12.7824
TC1400008034.hg.1	UNC79	unc-79 homolog, NALCN channel complex subunit	ENSG00000133958	57578	TRUE	1.26969	6.08298	10.591	8.09106e-10	2.19961e-07	12.7199
TC1200008924.hg.1	DTX1	deltex E3 ubiquitin ligase 1	ENSG00000135144	1840	FALSE	1.02135	7.20084	10.571	8.3651e-10	2.22895e-07	12.6872
TC0100015771.hg.1	SEMA6C	semaphorin 6C	ENSG00000143434	10500	FALSE	0.63315	7.90213	10.5643	8.45926e-10	2.22895e-07	12.6762
TC1400009147.hg.1	PYGL	glycogen phosphorylase L	ENSG00000100504	5836	FALSE	-0.939209	7.60922	-10.5534	8.61499e-10	2.23559e-07	12.6583
TC0200012713.hg.1	BCL11A	BAF chromatin remodeling complex subunit BCL11A	ENSG00000119866	53335	FALSE	0.752689	9.25226	10.5324	8.92172e-10	2.28063e-07	12.624
TC1700007993.hg.1	RUNDC3A	RUN domain containing 3A	ENSG00000108309	10900	FALSE	0.855248	7.69179	10.4916	9.55324e-10	2.40615e-07	12.5569
TC0400012967.hg.1	MGARP	mitochondria localized glutamic acid rich protein	ENSG00000137463	84709	FALSE	-1.3475	5.47636	-10.4769	9.79198e-10	2.43054e-07	12.5326
TC0800008243.hg.1	PDP1	pyruvate dehydrogenase phosphatase catalytic subunit 1	ENSG00000164951	54704	FALSE	-0.686373	10.3537	-10.4571	1.01222e-09	2.47662e-07	12.5001
TC0700008427.hg.1	DLX6	distal-less homeobox 6	ENSG00000006377	1750	FALSE	0.537148	9.53987	10.3796	1.15346e-09	2.78244e-07	12.3718
TC1100012452.hg.1	DSCAML1	DS cell adhesion molecule like 1	ENSG00000177103	57453	FALSE	0.949202	6.40346	10.3408	1.23152e-09	2.92948e-07	12.3074
TC2000008367.hg.1	PAK5	p21 (RAC1) activated kinase 5	ENSG00000101349	57144	FALSE	0.969733	5.46172	10.2792	1.36739e-09	3.20812e-07	12.2045
TC0100013445.hg.1	IFI6	interferon alpha inducible protein 6	ENSG00000126709	2537	FALSE	-0.736702	7.97871	-10.2125	1.53185e-09	3.49877e-07	12.0928
TC0700011626.hg.1	SEMA3C	semaphorin 3C	ENSG00000075223	10512	FALSE	-2.61521	4.99836	-10.2124	1.53213e-09	3.49877e-07	12.0927
TC0600013458.hg.1	EPM2A	EPM2A glucan phosphatase, laforin	ENSG00000112425	7957	FALSE	-1.39491	6.87916	-10.2014	1.56116e-09	3.51815e-07	12.0742
TC1900011894.hg.1	CACNA1A	calcium voltage-gated channel subunit alpha1 A	ENSG00000141837	773	FALSE	-1.11953	7.75905	-10.1719	1.64207e-09	3.65244e-07	12.0245
TC1900010743.hg.1	TGFB1	transforming growth factor beta 1	ENSG00000105329	7040	FALSE	-0.824136	6.63651	-10.1375	1.7418e-09	3.79206e-07	11.9665
TC0300012397.hg.1	PLXND1	plexin D1	ENSG00000004399	23129	FALSE	-0.722028	8.76446	-10.135	1.74912e-09	3.79206e-07	11.9623
TC0700009560.hg.1	CNTNAP2	contactin associated protein 2	ENSG00000174469	26047	TRUE	-1.02605	6.11437	-10.0868	1.90046e-09	4.06865e-07	11.8806
TC0900010570.hg.1	FRMD3	FERM domain containing 3	ENSG00000172159	257019	FALSE	0.829507	7.24965	10.0764	1.93482e-09	4.09108e-07	11.863
TC0700008873.hg.1	CAV1	caveolin 1	ENSG00000105974	857	FALSE	-1.09039	7.40902	-10.0451	2.04218e-09	4.26543e-07	11.8098
TC1500008046.hg.1	CEMIP	cell migration inducing hyaluronidase 1	ENSG00000103888	57214	FALSE	-0.935168	6.7775	-10.038	2.06726e-09	4.26578e-07	11.7978
TC2000006676.hg.1	LAMP5	lysosomal associated membrane protein family member 5	ENSG00000125869	24141	FALSE	0.861444	8.33438	9.96631	2.3407e-09	4.77253e-07	11.6754
TC1400007774.hg.1	NRXN3	neurexin 3	ENSG00000021645	9369	FALSE	0.505865	9.37678	9.90675	2.59631e-09	5.23141e-07	11.5733
TC0100008517.hg.1	NFIA	nuclear factor I A	ENSG00000162599	4774	FALSE	0.576303	10.0127	9.86543	2.79048e-09	5.55727e-07	11.5022
TC0X00010512.hg.1	CHRDL1	chordin like 1	ENSG00000101938	91851	FALSE	0.756137	8.4283	9.82291	3.00618e-09	5.91803e-07	11.4287
TC0500013193.hg.1	CRHBP	corticotropin releasing hormone binding protein	ENSG00000145708	1393	FALSE	-0.614923	8.73232	-9.79086	3.18012e-09	6.1893e-07	11.3732
TC1600010854.hg.1	CLEC18B	C-type lectin domain family 18 member B	ENSG00000140839	497190	FALSE	-0.755841	7.67092	-9.77887	3.24786e-09	6.25013e-07	11.3524
TC0700011066.hg.1	COBL	cordon-bleu WH2 repeat protein	ENSG00000106078	23242	FALSE	-0.544989	8.25248	-9.71505	3.63449e-09	6.86649e-07	11.2415
TC0600009862.hg.1	AKAP12	A-kinase anchoring protein 12	ENSG00000131016	9590	FALSE	-0.579309	9.47361	-9.7129	3.64834e-09	6.86649e-07	11.2377
TC2100007420.hg.1	COL18A1	collagen type XVIII alpha 1 chain	ENSG00000182871	80781	FALSE	-0.942759	7.78736	-9.64251	4.13255e-09	7.69328e-07	11.1147
TC1200009192.hg.1	BCL7A	BAF chromatin remodeling complex subunit BCL7A	ENSG00000110987	605	TRUE	0.583692	7.83909	9.51132	5.22148e-09	9.61595e-07	10.8836
TC0300008148.hg.1	TMEM45A	transmembrane protein 45A	ENSG00000181458	55076	FALSE	-1.40143	5.42865	-9.36813	6.7562e-09	1.23099e-06	10.6288
TC0100009241.hg.1	S1PR1	sphingosine-1-phosphate receptor 1	ENSG00000170989	1901	FALSE	0.786251	7.11813	9.3576	6.88614e-09	1.2368e-06	10.61
TC0500010835.hg.1	PLK2	polo like kinase 2	ENSG00000145632	10769	FALSE	-0.939371	7.51259	-9.35389	6.93252e-09	1.2368e-06	10.6034
TC1800008348.hg.1	AQP4	aquaporin 4	ENSG00000171885	361	FALSE	0.623635	10.1293	9.34591	7.03336e-09	1.24186e-06	10.5891
TC1100012350.hg.1	DRD2	dopamine receptor D2	ENSG00000149295	1813	FALSE	-1.50352	5.07861	-9.32788	7.26695e-09	1.27001e-06	10.5567
TC1000012213.hg.1	INSYN2A	inhibitory synaptic factor 2A	ENSG00000188916	642938	FALSE	-0.908999	7.61613	-9.32195	7.34552e-09	1.27077e-06	10.5461
TC1300007167.hg.1	PHF11	PHD finger protein 11	ENSG00000136147	51131	FALSE	-1.12799	4.66262	-9.3005	7.63724e-09	1.30803e-06	10.5076
TC1500007839.hg.1	ISLR	immunoglobulin superfamily containing leucine rich repeat	ENSG00000129009	3671	TRUE	-0.71622	8.37145	-9.29289	7.74362e-09	1.31312e-06	10.4939
TC0100011073.hg.1	CRB1	crumbs cell polarity complex component 1	ENSG00000134376	23418	FALSE	0.778996	8.62668	9.28046	7.92062e-09	1.32918e-06	10.4715
TC1800006506.hg.1	MYL12A	myosin light chain 12A	ENSG00000101608	10627	FALSE	-0.58576	8.85015	-9.27542	7.99354e-09	1.32918e-06	10.4624
TC1500007829.hg.1	LOXL1	lysyl oxidase like 1	ENSG00000129038	4016	FALSE	-0.60731	9.80453	-9.26849	8.095e-09	1.33311e-06	10.45
TC0300007669.hg.1	SYNPR	synaptoporin	ENSG00000163630	132204	FALSE	1.16095	6.33774	9.251	8.35713e-09	1.36317e-06	10.4184
TC0200014775.hg.1	KCNH7	potassium voltage-gated channel subfamily H member 7	ENSG00000184611	90134	FALSE	1.58941	5.64803	9.18988	9.34408e-09	1.50977e-06	10.3079
TC1700008769.hg.1	KCNJ2	potassium inwardly rectifying channel subfamily J member 2	ENSG00000123700	3759	FALSE	-0.791385	5.41896	-9.14419	1.01605e-08	1.62635e-06	10.225
TC0100010085.hg.1	CHRNB2	cholinergic receptor nicotinic beta 2 subunit	ENSG00000160716	1141	FALSE	0.660168	6.75499	9.13022	1.04246e-08	1.65317e-06	10.1995
TC0800009891.hg.1	STC1	stanniocalcin 1	ENSG00000159167	6781	FALSE	0.648501	9.08072	9.1119	1.07818e-08	1.68237e-06	10.1662
TC0800010382.hg.1	SNAI2	snail family transcriptional repressor 2	ENSG00000019549	6591	FALSE	-0.902256	7.01117	-9.11072	1.08052e-08	1.68237e-06	10.164
TC0600010542.hg.1	SERPINB6	serpin family B member 6	ENSG00000124570	5269	FALSE	-0.677041	9.37177	-9.09334	1.11567e-08	1.72145e-06	10.1323
TC2000008318.hg.1	FERMT1	FERM domain containing kindlin 1	ENSG00000101311	55612	FALSE	-1.46227	6.35001	-9.07504	1.15394e-08	1.7646e-06	10.0989
TC1200008224.hg.1	GLIPR1	GLI pathogenesis related 1	ENSG00000139278	11010	FALSE	-0.855757	8.2523	-9.04476	1.22031e-08	1.84958e-06	10.0435
TC1700007520.hg.1	CDK5R1	cyclin dependent kinase 5 regulatory subunit 1	ENSG00000176749	8851	FALSE	0.814694	8.30151	9.00902	1.30377e-08	1.95875e-06	9.97791
TC1500007237.hg.1	SCG3	secretogranin III	ENSG00000104112	29106	FALSE	1.25782	7.24492	8.9907	1.34882e-08	2.00881e-06	9.94424
TC2100007872.hg.1	GRIK1	glutamate ionotropic receptor kainate type subunit 1	ENSG00000171189	2897	FALSE	0.73199	8.29913	8.96719	1.40899e-08	2.08033e-06	9.90097
TC0900009905.hg.1	CNTFR	ciliary neurotrophic factor receptor	ENSG00000122756	1271	FALSE	0.478685	9.83779	8.9531	1.44639e-08	2.11729e-06	9.875
TC1600006888.hg.1	CIITA	class II major histocompatibility complex transactivator	ENSG00000179583	4261	FALSE	-1.27567	6.43388	-8.89997	1.59695e-08	2.31788e-06	9.77681
TC0900010886.hg.1	PTCH1	patched 1	ENSG00000185920	5727	FALSE	0.603	9.34807	8.88055	1.65593e-08	2.38328e-06	9.74084
TC1600009349.hg.1	GRIN2A	glutamate ionotropic receptor NMDA type subunit 2A	ENSG00000183454	2903	FALSE	0.920346	6.72642	8.8408	1.78386e-08	2.52546e-06	9.66702
TC1900010005.hg.1	RAB3A	RAB3A, member RAS oncogene family	ENSG00000105649	5864	FALSE	0.644535	6.82281	8.8407	1.7842e-08	2.52546e-06	9.66683
TC1600006537.hg.1	BAIAP3	BAI1 associated protein 3	ENSG00000007516	8938	FALSE	0.855733	7.10654	8.79949	1.92768e-08	2.70618e-06	9.59009
TC1700011088.hg.1	COL1A1	collagen type I alpha 1 chain	ENSG00000108821	1277	FALSE	-1.04339	8.26763	-8.78109	1.99558e-08	2.77873e-06	9.55574
TC0400011695.hg.1	SEC24D	SEC24 homolog D, COPII coat complex component	ENSG00000150961	9871	FALSE	-0.731397	7.63044	-8.70822	2.28969e-08	3.16254e-06	9.41928
TC1100012722.hg.1	CDON	cell adhesion associated, oncogene regulated	ENSG00000064309	50937	FALSE	-0.481279	9.6222	-8.68658	2.38546e-08	3.26846e-06	9.37861
TC1100010987.hg.1	FABP5	fatty acid binding protein 5	ENSG00000164687	2171	FALSE	-0.633196	9.27799	-8.67209	2.45187e-08	3.33279e-06	9.35134
TC1200012805.hg.1	TAC3	tachykinin precursor 3	ENSG00000166863	6866	FALSE	0.626203	9.29207	8.65132	2.55042e-08	3.43945e-06	9.31221
TC0X00007919.hg.1	SRPX2	sushi repeat containing protein X-linked 2	ENSG00000102359	27286	FALSE	-1.38216	5.05862	-8.63991	2.6063e-08	3.48735e-06	9.29069
TC0100016112.hg.1	TAGLN2	transgelin 2	ENSG00000158710	8407	FALSE	-0.486117	9.91336	-8.60735	2.77283e-08	3.68142e-06	9.22918
TC1900011004.hg.1	SLC1A5	solute carrier family 1 member 5	ENSG00000105281	6510	FALSE	-0.859607	7.23193	-8.59376	2.84557e-08	3.74893e-06	9.20346
TC0100011533.hg.1	ATF3	activating transcription factor 3	ENSG00000162772	467	FALSE	-0.661183	7.08821	-8.58703	2.88236e-08	3.76841e-06	9.1907
TC0900008708.hg.1	LHX2	LIM homeobox 2	ENSG00000106689	9355	FALSE	-0.886645	7.76268	-8.55888	3.04148e-08	3.94631e-06	9.13733
TC0200016424.hg.1	LBH	LBH regulator of WNT signaling pathway	ENSG00000213626	81606	FALSE	-0.605744	9.53643	-8.55362	3.07221e-08	3.95622e-06	9.12734
TC0100013072.hg.1	ATP13A2	ATPase cation transporting 13A2	ENSG00000159363	23400	FALSE	-0.582439	10.0609	-8.5347	3.18541e-08	4.07138e-06	9.09139
TC0200015002.hg.1	CHN1	chimerin 1	ENSG00000128656	1123	FALSE	-0.503057	10.0623	-8.5298	3.21541e-08	4.07929e-06	9.08207
TC1400009698.hg.1	LTBP2	latent transforming growth factor beta binding protein 2	ENSG00000119681	4053	FALSE	-0.740334	7.92592	-8.51764	3.2912e-08	4.13818e-06	9.05893
TC0100018497.hg.1	SHC1	SHC adaptor protein 1	ENSG00000160691	6464	FALSE	-0.422776	8.82328	-8.51464	3.31016e-08	4.13818e-06	9.05322
TC1200010145.hg.1	BCAT1	branched chain amino acid transaminase 1	ENSG00000060982	586	FALSE	-0.794143	7.32938	-8.50966	3.34194e-08	4.14763e-06	9.04373
TC0600014276.hg.1	HLA-DMB	major histocompatibility complex, class II, DM beta	ENSG00000242574	3109	TRUE	-1.38325	5.93605	-8.46607	3.63369e-08	4.45009e-06	8.96055
TC1000008081.hg.1	KAT6B	lysine acetyltransferase 6B	ENSG00000156650	23522	TRUE	0.439559	9.85556	8.46385	3.6492e-08	4.45009e-06	8.95632
TC0500011852.hg.1	LOX	lysyl oxidase	ENSG00000113083	4015	FALSE	-0.683227	7.55735	-8.46181	3.66358e-08	4.45009e-06	8.95241
TC1500007510.hg.1	TPM1	tropomyosin 1	ENSG00000140416	7168	FALSE	-0.455189	10.6334	-8.45691	3.69823e-08	4.46054e-06	8.94305
TC0800007311.hg.1	ADGRA2	adhesion G protein-coupled receptor A2	ENSG00000020181	25960	FALSE	-1.04755	5.59331	-8.42582	3.92649e-08	4.70273e-06	8.88353
TC0100016631.hg.1	RGS16	regulator of G protein signaling 16	ENSG00000143333	6004	FALSE	-0.700962	6.99728	-8.39626	4.15704e-08	4.94428e-06	8.82681
TC1100011651.hg.1	KLHL35	kelch like family member 35	ENSG00000149243	283212	FALSE	0.537907	6.69184	8.3709	4.36601e-08	5.15701e-06	8.77804
TC1000007461.hg.1	RASSF4	Ras association domain family member 4	ENSG00000107551	83937	FALSE	-0.69144	8.61117	-8.34923	4.5531e-08	5.34116e-06	8.73632
TC0100010281.hg.1	ATP1A2	ATPase Na+/K+ transporting subunit alpha 2	ENSG00000018625	477	FALSE	0.593504	9.34093	8.34352	4.60379e-08	5.36389e-06	8.72531
TC1200010229.hg.1	PTHLH	parathyroid hormone like hormone	ENSG00000087494	5744	FALSE	-0.838205	6.28639	-8.32127	4.80697e-08	5.56277e-06	8.68237
TC0500009023.hg.1	JAKMIP2-AS1	JAKMIP2 antisense RNA 1	ENSG00000280780	153469	FALSE	-0.93978	5.89324	-8.3038	4.97294e-08	5.71621e-06	8.64861
TC1400007154.hg.1	GNG2	G protein subunit gamma 2	ENSG00000186469	54331	FALSE	0.544617	8.78109	8.29861	5.02334e-08	5.73565e-06	8.63858
TC0200014735.hg.1	RBMS1	RNA binding motif single stranded interacting protein 1	ENSG00000153250	5937	TRUE	-1.55638	4.95548	-8.27922	5.21653e-08	5.91678e-06	8.60105
TC0500009566.hg.1	CPLX2	complexin 2	ENSG00000145920	10814	FALSE	1.31212	7.30726	8.25674	5.45014e-08	6.14109e-06	8.55747
TC1900009112.hg.1	PLPPR3	phospholipid phosphatase related 3	ENSG00000129951	79948	TRUE	0.718398	7.18255	8.24057	5.6249e-08	6.29658e-06	8.52607
TC2000008111.hg.1	MYT1	myelin transcription factor 1	ENSG00000196132	4661	TRUE	0.865921	7.0728	8.19745	6.11975e-08	6.80603e-06	8.44219
TC0900009740.hg.1	ELAVL2	ELAV like RNA binding protein 2	ENSG00000107105	1993	FALSE	0.569965	7.79065	8.18165	6.31219e-08	6.97477e-06	8.41138
TC1900011870.hg.1	ELAVL3	ELAV like RNA binding protein 3	ENSG00000196361	1995	FALSE	0.521776	8.96962	8.16317	6.5452e-08	7.18587e-06	8.37531
TC0400011580.hg.1	CFI	complement factor I	ENSG00000205403	3426	FALSE	-0.59627	9.65934	-8.14144	6.83057e-08	7.45141e-06	8.33284
TC0800008080.hg.1	FABP5	fatty acid binding protein 5	ENSG00000164687	2171	FALSE	-0.574965	8.68996	-8.0784	7.73378e-08	8.38292e-06	8.20923
TC0100012469.hg.1	MXRA8	matrix remodeling associated 8	ENSG00000162576	54587	FALSE	-0.829384	7.36739	-8.07335	7.81129e-08	8.38292e-06	8.1993
TC1500008772.hg.1	GABRB3	gamma-aminobutyric acid type A receptor subunit beta3	ENSG00000166206	2562	FALSE	0.568398	9.33298	8.07205	7.8313e-08	8.38292e-06	8.19676
TC1100013222.hg.1	CARD16	caspase recruitment domain family member 16	ENSG00000204397	114769	FALSE	-0.808697	7.52622	-8.0524	8.14139e-08	8.66072e-06	8.1581
TC0200016651.hg.1	CYP1B1	cytochrome P450 family 1 subfamily B member 1	ENSG00000138061	1545	FALSE	-1.29577	4.54953	-8.01868	8.70352e-08	9.20156e-06	8.09163
TC0300008594.hg.1	KALRN	kalirin RhoGEF kinase	ENSG00000160145	8997	FALSE	0.547197	9.53127	7.98769	9.25545e-08	9.72503e-06	8.0304
TC2200009271.hg.1	APOBEC3C	apolipoprotein B mRNA editing enzyme catalytic subunit 3C	ENSG00000244509	27350	FALSE	-0.804385	6.97203	-7.9843	9.31792e-08	9.73097e-06	8.02371
TC1600007944.hg.1	GNAO1	G protein subunit alpha o1	ENSG00000087258	2775	FALSE	0.531057	10.0377	7.97325	9.52487e-08	9.88681e-06	8.00183
TC0700009236.hg.1	CALD1	caldesmon 1	ENSG00000122786	800	FALSE	-0.475872	10.5991	-7.96771	9.63027e-08	9.936e-06	7.99087
TC1400007632.hg.1	PAPLN	papilin, proteoglycan like sulfated glycoprotein	ENSG00000100767	89932	FALSE	-0.738438	6.99534	-7.95777	9.8227e-08	1.00739e-05	7.97117
TC0400008725.hg.1	PCDH10	protocadherin 10	ENSG00000138650	57575	FALSE	0.593003	7.70646	7.94382	1.00993e-07	1.02959e-05	7.94351
TC0200008566.hg.1	CNGA3	cyclic nucleotide gated channel subunit alpha 3	ENSG00000144191	1261	FALSE	0.446394	7.87878	7.93578	1.02623e-07	1.04002e-05	7.92757
TC1100008948.hg.1	GRIA4	glutamate ionotropic receptor AMPA type subunit 4	ENSG00000152578	2893	FALSE	0.440459	10.7085	7.89514	1.11295e-07	1.12126e-05	7.84677
TC0100013229.hg.1	HSPG2	heparan sulfate proteoglycan 2	ENSG00000142798	3339	FALSE	-0.526776	8.23625	-7.85619	1.20318e-07	1.19987e-05	7.76912
TC0800010252.hg.1	ANK1	ankyrin 1	ENSG00000029534	286	FALSE	-0.666657	8.23744	-7.85288	1.21117e-07	1.19987e-05	7.76252
TC0900006481.hg.1	VLDLR	very low density lipoprotein receptor	ENSG00000147852	7436	FALSE	-0.425487	7.97236	-7.85254	1.21199e-07	1.19987e-05	7.76184
TC0300006599.hg.1	SLC6A1	solute carrier family 6 member 1	ENSG00000157103	6529	FALSE	0.726556	6.97888	7.80277	1.33936e-07	1.31835e-05	7.66228
TC0100010543.hg.1	ATP1B1	ATPase Na+/K+ transporting subunit beta 1	ENSG00000143153	481	FALSE	0.457563	9.93994	7.78186	1.39692e-07	1.36714e-05	7.62036
TC0100018418.hg.1	IFFO2	intermediate filament family orphan 2	ENSG00000169991	126917	FALSE	-0.819738	7.58842	-7.74754	1.49697e-07	1.45674e-05	7.55142
TC1100011176.hg.1	NRXN2	neurexin 2	ENSG00000110076	9379	FALSE	0.646383	7.35874	7.73175	1.54548e-07	1.49545e-05	7.51964
TC0500009342.hg.1	TENM2	teneurin transmembrane protein 2	ENSG00000145934	57451	FALSE	-0.980825	6.56148	-7.71802	1.58897e-07	1.52889e-05	7.49198
TC0700006690.hg.1	NXPH1	neurexophilin 1	ENSG00000122584	30010	FALSE	0.715874	7.36989	7.70453	1.63294e-07	1.56242e-05	7.46478
TC0100015873.hg.1	S100A13	S100 calcium binding protein A13	ENSG00000189171	6284	FALSE	-0.49773	8.15605	-7.6912	1.67761e-07	1.59625e-05	7.43788
TC1100012528.hg.1	THY1	Thy-1 cell surface antigen	ENSG00000154096	7070	FALSE	-0.988921	6.77622	-7.68505	1.69864e-07	1.6053e-05	7.42546
TC0400012902.hg.1	FGFBP2	fibroblast growth factor binding protein 2	ENSG00000137441	83888	FALSE	-1.21935	6.37359	-7.68296	1.70587e-07	1.6053e-05	7.42123
TC1600010316.hg.1	TOX3	TOX high mobility group box family member 3	ENSG00000103460	27324	FALSE	0.488746	9.34199	7.63787	1.86936e-07	1.74953e-05	7.33
TC0600009336.hg.1	CLVS2	clavesin 2	ENSG00000146352	134829	FALSE	1.50934	6.11198	7.63311	1.88757e-07	1.75698e-05	7.32033
TC1600010732.hg.1	NQO1	NAD(P)H quinone dehydrogenase 1	ENSG00000181019	1728	FALSE	-0.645882	7.95473	-7.60092	2.01538e-07	1.86581e-05	7.25501
TC2100007451.hg.1	COL6A2	collagen type VI alpha 2 chain	ENSG00000142173	1292	FALSE	-1.216	5.8621	-7.58277	2.09137e-07	1.92574e-05	7.21811
TC1900010782.hg.1	ATP1A3	ATPase Na+/K+ transporting subunit alpha 3	ENSG00000105409	478	FALSE	0.713696	6.67021	7.57315	2.13285e-07	1.95344e-05	7.19853
TC1500010407.hg.1	ANPEP	alanyl aminopeptidase, membrane	ENSG00000166825	290	FALSE	-1.33891	5.02111	-7.55901	2.19535e-07	1.99999e-05	7.16973
TC0100018307.hg.1	ACKR1	atypical chemokine receptor 1 (Duffy blood group)	ENSG00000213088	2532	FALSE	0.793159	5.42822	7.54517	2.25835e-07	2.03566e-05	7.14152
TC0100008243.hg.1	ELAVL4	ELAV like RNA binding protein 4	ENSG00000162374	1996	FALSE	1.38197	6.77466	7.54499	2.25921e-07	2.03566e-05	7.14114
TC0X00008054.hg.1	RNF128	ring finger protein 128	ENSG00000133135	79589	FALSE	-1.18985	4.2527	-7.54262	2.27017e-07	2.03566e-05	7.13632
TC2100008256.hg.1	RSPH1	radial spoke head component 1	ENSG00000160188	89765	FALSE	0.775744	4.72226	7.52952	2.33186e-07	2.08009e-05	7.10958
TC0300013877.hg.1	EPHB1	EPH receptor B1	ENSG00000154928	2047	FALSE	0.856487	6.2669	7.50966	2.42872e-07	2.15527e-05	7.06899
TC1700010223.hg.1	SEZ6	seizure related 6 homolog	ENSG00000063015	124925	FALSE	0.558269	8.85973	7.48886	2.53461e-07	2.23764e-05	7.02644
TC0600013797.hg.1	AGPAT4-IT1	AGPAT4 intronic transcript 1		79992	FALSE	0.552421	8.5282	7.4805	2.57846e-07	2.26468e-05	7.00933
TC0900009902.hg.1	ENHO	energy homeostasis associated	ENSG00000168913	375704	FALSE	0.681345	7.50333	7.4711	2.6288e-07	2.29711e-05	6.99005
TC1200009972.hg.1	GPR19	G protein-coupled receptor 19	ENSG00000183150	2842	FALSE	1.14913	5.19753	7.46347	2.67033e-07	2.32032e-05	6.97441
TC1100010055.hg.1	SCUBE2	signal peptide, CUB domain and EGF like domain containing 2	ENSG00000175356	57758	FALSE	-1.05143	5.88615	-7.46127	2.68245e-07	2.32032e-05	6.9699
TC2100007446.hg.1	COL6A1	collagen type VI alpha 1 chain	ENSG00000142156	1291	FALSE	-0.560623	8.63853	-7.45485	2.7181e-07	2.33934e-05	6.95673
TC0600014318.hg.1	TENT5A	terminal nucleotidyltransferase 5A	ENSG00000112773	55603	FALSE	-0.739783	6.81968	-7.43993	2.80289e-07	2.40026e-05	6.92609
TC0300008332.hg.1	TAGLN3	transgelin 3	ENSG00000144834	29114	FALSE	0.448734	9.83211	7.43586	2.82651e-07	2.40844e-05	6.91772
TC0500008454.hg.1	PRR16	proline rich 16	ENSG00000184838	51334	FALSE	-1.2513	5.31222	-7.42962	2.86307e-07	2.42752e-05	6.9049
TC0300007973.hg.1	CADM2	cell adhesion molecule 2	ENSG00000175161	253559	FALSE	0.678134	7.58086	7.36927	3.24304e-07	2.73613e-05	6.7806
TC0200015958.hg.1	DNER	delta/notch like EGF repeat containing	ENSG00000187957	92737	FALSE	0.849389	6.57441	7.35079	3.36953e-07	2.82891e-05	6.74243
TC2000006993.hg.1	SYNDIG1	synapse differentiation inducing 1	ENSG00000101463	79953	FALSE	-0.697434	7.3567	-7.32641	3.54427e-07	2.95943e-05	6.69199
TC1100011833.hg.1	SYTL2	synaptotagmin like 2	ENSG00000137501	54843	FALSE	-0.500608	8.93608	-7.32394	3.5625e-07	2.95943e-05	6.68687
TC1300008645.hg.1	TRPC4	transient receptor potential cation channel subfamily C member 4	ENSG00000133107	7223	FALSE	0.653493	6.47639	7.322	3.57682e-07	2.95943e-05	6.68287
TC0200010219.hg.1	FAM171B	family with sequence similarity 171 member B	ENSG00000144369	165215	FALSE	0.544801	8.79132	7.29751	3.76348e-07	3.0989e-05	6.63212
TC0300011311.hg.1	FAM107A	family with sequence similarity 107 member A	ENSG00000168309	11170	FALSE	0.599442	7.8046	7.29338	3.79596e-07	3.11069e-05	6.62354
TC1100009330.hg.1	UBASH3B	ubiquitin associated and SH3 domain containing B	ENSG00000154127	84959	FALSE	-0.512058	7.08388	-7.27956	3.90668e-07	3.18618e-05	6.59485
TC0100018271.hg.1	OLFML3	olfactomedin like 3	ENSG00000116774	56944	FALSE	-1.1618	4.94559	-7.26481	4.0285e-07	3.26996e-05	6.56422
TC0200016469.hg.1	ANXA4	annexin A4	ENSG00000196975	307	FALSE	-0.954784	6.58685	-7.2496	4.15829e-07	3.35939e-05	6.53258
TC0100011211.hg.1	GPR37L1	G protein-coupled receptor 37 like 1	ENSG00000170075	9283	FALSE	0.564035	7.83581	7.2406	4.23709e-07	3.40698e-05	6.51385
TC0700012011.hg.1	ACTL6B	actin like 6B	ENSG00000077080	51412	FALSE	1.04926	6.61528	7.23307	4.3042e-07	3.44477e-05	6.49816
TC0300011550.hg.1	PDZRN3	PDZ domain containing ring finger 3	ENSG00000121440	23024	FALSE	0.488754	7.70159	7.2193	4.42973e-07	3.51255e-05	6.46948
TC0300006596.hg.1	SLC6A11	solute carrier family 6 member 11	ENSG00000132164	6538	FALSE	0.69665	7.54208	7.21928	4.42991e-07	3.51255e-05	6.46944
TC0400011486.hg.1	CXXC4	CXXC finger protein 4	ENSG00000168772	80319	FALSE	1.10461	4.40728	7.18822	4.72722e-07	3.73102e-05	6.40462
TC1000011485.hg.1	PDLIM1	PDZ and LIM domain 1	ENSG00000107438	9124	FALSE	-0.556182	8.79395	-7.18089	4.80032e-07	3.77134e-05	6.3893
TC2200007505.hg.1	SEPTIN3	septin 3	ENSG00000100167	55964	FALSE	0.359802	10.8731	7.17236	4.88688e-07	3.82181e-05	6.37147
TC0200011837.hg.1	CYRIA	CYFIP related Rac1 interactor A	ENSG00000197872	81553	FALSE	0.55999	7.66853	7.14113	5.21776e-07	4.06203e-05	6.30609
TC0100014852.hg.1	GBP1	guanylate binding protein 1	ENSG00000117228	2633	FALSE	-0.467476	8.43764	-7.1387	5.24441e-07	4.0643e-05	6.301
TC1000011400.hg.1	ANKRD1	ankyrin repeat domain 1	ENSG00000148677	27063	FALSE	-1.35584	4.1221	-7.1346	5.28979e-07	4.081e-05	6.2924
TC0900009145.hg.1	OLFM1	olfactomedin 1	ENSG00000130558	10439	FALSE	0.891154	5.96024	7.13213	5.31726e-07	4.08353e-05	6.28723
TC1100012949.hg.1	IFITM1	interferon induced transmembrane protein 1	ENSG00000185885	8519	FALSE	-0.750209	6.53361	-7.13004	5.34076e-07	4.08353e-05	6.28283
TC1200009913.hg.1	YBX3	Y-box binding protein 3	ENSG00000060138	8531	FALSE	-0.39203	9.87373	-7.12687	5.37646e-07	4.09256e-05	6.27618
TC1100012165.hg.1	CASP4	caspase 4	ENSG00000196954	837	FALSE	-1.09768	5.43032	-7.09723	5.72229e-07	4.30493e-05	6.21397
TC0600014348.hg.1	NHSL1	NHS like 1	ENSG00000135540	57224	FALSE	0.412127	10.1018	7.09379	5.76393e-07	4.30493e-05	6.20673
TC0100017957.hg.1	PLD5	phospholipase D family member 5	ENSG00000180287	200150	FALSE	0.611151	7.83336	7.09278	5.77624e-07	4.30493e-05	6.2046
TC0500013204.hg.1	CAST	calpastatin	ENSG00000153113	831	FALSE	-0.456329	9.08588	-7.09184	5.78762e-07	4.30493e-05	6.20264
TC0700010412.hg.1	SP8	Sp8 transcription factor	ENSG00000164651	221833	FALSE	0.561481	7.62872	7.09004	5.80961e-07	4.30493e-05	6.19885
TC0600014257.hg.1	HLA-C	major histocompatibility complex, class I, C	ENSG00000204525	3107	TRUE	-0.432711	9.40619	-7.08914	5.82062e-07	4.30493e-05	6.19696
TC0200014382.hg.1	TMEM163	transmembrane protein 163	ENSG00000152128	81615	FALSE	0.503471	8.25006	7.08773	5.83791e-07	4.30493e-05	6.194
TC1700008082.hg.1	MAPT	microtubule associated protein tau	ENSG00000186868	4137	TRUE	0.528473	8.61911	7.08559	5.86432e-07	4.30493e-05	6.1895
TC0600014110.hg.1	PSMB9	proteasome 20S subunit beta 9	ENSG00000240065	5698	TRUE	-0.418377	8.7538	-7.08259	5.90148e-07	4.30493e-05	6.18319
TC0100011463.hg.1	SYT14	synaptotagmin 14	ENSG00000143469	255928	FALSE	0.50114	9.10816	7.08131	5.91749e-07	4.30493e-05	6.18049
TC0600014258.hg.1	HLA-B	major histocompatibility complex, class I, B	ENSG00000234745	3106	TRUE	-0.466502	9.31485	-7.08015	5.93194e-07	4.30493e-05	6.17805
TC0600012040.hg.1	TRAM2	translocation associated membrane protein 2	ENSG00000065308	9697	FALSE	-0.415168	10.5332	-7.07809	5.95774e-07	4.30541e-05	6.17372
TC0300014075.hg.1	TRIM59	tripartite motif containing 59	ENSG00000213186	286827	FALSE	-1.09442	6.01856	-7.07126	6.04415e-07	4.3495e-05	6.15935
TC1100008257.hg.1	ANO1	anoctamin 1	ENSG00000131620	55107	FALSE	-0.588145	8.00212	-7.0501	6.32026e-07	4.52917e-05	6.11476
TC0400008664.hg.1	PLK4	polo like kinase 4	ENSG00000142731	10733	FALSE	-1.17225	7.63805	-7.04553	6.38152e-07	4.55401e-05	6.10514
TC0700011865.hg.1	DLX5	distal-less homeobox 5	ENSG00000105880	1749	FALSE	0.49307	9.91222	7.03471	6.52908e-07	4.63998e-05	6.08232
TC0X00006758.hg.1	CNKSR2	connector enhancer of kinase suppressor of Ras 2	ENSG00000149970	22866	FALSE	0.594619	7.95463	7.01439	6.81598e-07	4.8208e-05	6.03939
TC1100009406.hg.1	HEPN1	hepatocellular carcinoma, down-regulated 1	ENSG00000221932	641654	FALSE	0.718821	6.25283	7.01274	6.83982e-07	4.8208e-05	6.03591
TC0200009871.hg.1	CSRNP3	cysteine and serine rich nuclear protein 3	ENSG00000178662	80034	FALSE	1.23167	6.92101	6.96833	7.51496e-07	5.27495e-05	5.94194
TC0300013973.hg.1	CELSR3	cadherin EGF LAG seven-pass G-type receptor 3	ENSG00000008300	1951	TRUE	0.724057	6.70861	6.96367	7.58968e-07	5.30565e-05	5.93207
TC0500010498.hg.1	RANBP3L	RAN binding protein 3 like	ENSG00000164188	202151	FALSE	0.65101	5.94268	6.93758	8.02236e-07	5.58532e-05	5.87672
TC0100006857.hg.1	DISP3	dispatched RND transporter family member 3	ENSG00000204624	57540	FALSE	0.759474	6.24434	6.9323	8.11305e-07	5.61776e-05	5.8655
TC1100009657.hg.1	IFITM3	interferon induced transmembrane protein 3	ENSG00000142089	10410	FALSE	-0.398804	10.3481	-6.93105	8.13455e-07	5.61776e-05	5.86285
TC2000009887.hg.1	PLCB1	phospholipase C beta 1	ENSG00000182621	23236	FALSE	0.493084	7.90771	6.92499	8.24017e-07	5.66785e-05	5.84998
TC0100018451.hg.1	GBP2	guanylate binding protein 2	ENSG00000162645	2634	FALSE	-0.877518	5.67402	-6.92133	8.30456e-07	5.68929e-05	5.84221
TC0100015864.hg.1	S100A6	S100 calcium binding protein A6	ENSG00000197956	6277	FALSE	-0.614506	8.1968	-6.9011	8.67034e-07	5.91621e-05	5.79918
TC1200010839.hg.1	ITGA5	integrin subunit alpha 5	ENSG00000161638	3678	FALSE	-1.02315	6.00893	-6.89244	8.83203e-07	6.00262e-05	5.78073
TC1000008431.hg.1	PCGF5	polycomb group ring finger 5	ENSG00000180628	84333	FALSE	-0.586281	7.3988	-6.88427	8.98732e-07	6.08402e-05	5.76333
TC1100012698.hg.1	HEPACAM	hepatic and glial cell adhesion molecule	ENSG00000165478	220296	FALSE	0.681829	7.3217	6.88026	9.0645e-07	6.11211e-05	5.75479
TC1500009348.hg.1	FBN1	fibrillin 1	ENSG00000166147	2200	FALSE	-0.713977	7.10626	-6.87358	9.19468e-07	6.12072e-05	5.74056
TC1900007040.hg.1	CNN1	calponin 1	ENSG00000130176	1264	FALSE	-0.516093	8.40639	-6.87357	9.19483e-07	6.12072e-05	5.74054
TC0100018246.hg.1	LRRC8C	leucine rich repeat containing 8 VRAC subunit C	ENSG00000171488	84230	FALSE	0.651053	7.01365	6.87255	9.21485e-07	6.12072e-05	5.73837
TC0500013089.hg.1	GFPT2	glutamine-fructose-6-phosphate transaminase 2	ENSG00000131459	9945	FALSE	-0.496929	7.54786	-6.87136	9.23841e-07	6.12072e-05	5.73582
TC0900007877.hg.1	GADD45G	growth arrest and DNA damage inducible gamma	ENSG00000130222	10912	FALSE	0.815815	8.09454	6.87047	9.25596e-07	6.12072e-05	5.73393
TC0800009905.hg.1	NEFL	neurofilament light chain	ENSG00000277586	4747	FALSE	-1.03203	6.17164	-6.8655	9.35476e-07	6.16227e-05	5.72333
TC0300012155.hg.1	HGD	homogentisate 1,2-dioxygenase	ENSG00000113924	3081	FALSE	-0.933036	5.56999	-6.84071	9.86396e-07	6.4728e-05	5.67041
TC1400009066.hg.1	MIS18BP1	MIS18 binding protein 1	ENSG00000129534	55320	FALSE	-0.951254	6.21127	-6.81951	1.0322e-06	6.73959e-05	5.62509
TC1700011653.hg.1	SDK2	sidekick cell adhesion molecule 2	ENSG00000069188	54549	FALSE	0.416412	7.67488	6.81828	1.03492e-06	6.73959e-05	5.62247
TC0800006492.hg.1	KBTBD11	kelch repeat and BTB domain containing 11	ENSG00000176595	9920	TRUE	0.547364	7.74754	6.81642	1.03907e-06	6.74094e-05	5.61848
TC1000008767.hg.1	INA	internexin neuronal intermediate filament protein alpha	ENSG00000148798	9118	FALSE	0.513418	9.68521	6.80574	1.06312e-06	6.87097e-05	5.59563
TC1900010864.hg.1	KCNN4	potassium calcium-activated channel subfamily N member 4	ENSG00000104783	3783	FALSE	-0.704805	7.02708	-6.79896	1.0787e-06	6.94542e-05	5.58111
TC0100016199.hg.1	OLFML2B	olfactomedin like 2B	ENSG00000162745	25903	FALSE	-0.719518	6.17755	-6.77874	1.12653e-06	7.22625e-05	5.53779
TC1000007934.hg.1	ADAMTS14	ADAM metallopeptidase with thrombospondin type 1 motif 14	ENSG00000138316	140766	FALSE	-0.815238	6.19775	-6.77612	1.13289e-06	7.23994e-05	5.53216
TC0100016899.hg.1	KIF21B	kinesin family member 21B	ENSG00000116852	23046	FALSE	1.10237	6.05183	6.76918	1.14993e-06	7.32148e-05	5.51726
TC0600011960.hg.1	TNFRSF21	TNF receptor superfamily member 21	ENSG00000146072	27242	FALSE	0.527174	7.31579	6.75612	1.18266e-06	7.50202e-05	5.48924
TC1700008844.hg.1	TTYH2	tweety family member 2	ENSG00000141540	94015	FALSE	0.474063	9.33684	6.75256	1.19175e-06	7.5318e-05	5.48159
TC0200014414.hg.1	CXCR4	C-X-C motif chemokine receptor 4	ENSG00000121966	7852	FALSE	0.413497	9.45416	6.73926	1.22636e-06	7.72198e-05	5.45302
TC0900010969.hg.1	CORO2A	coronin 2A	ENSG00000106789	7464	FALSE	-0.948828	4.82135	-6.73319	1.24248e-06	7.79487e-05	5.43997
TC1600011398.hg.1	MMP2	matrix metallopeptidase 2	ENSG00000087245	4313	FALSE	-0.36901	10.3366	-6.72339	1.269e-06	7.90589e-05	5.41889
TC0700007191.hg.1	EEPD1	endonuclease/exonuclease/phosphatase family domain containing 1	ENSG00000122547	80820	FALSE	0.727967	5.6742	6.72324	1.26941e-06	7.90589e-05	5.41857
TC1200012597.hg.1	MGST1	microsomal glutathione S-transferase 1	ENSG00000008394	4257	FALSE	-1.46407	4.1467	-6.71694	1.28676e-06	7.98492e-05	5.40501
TC1700009850.hg.1	PMP22	peripheral myelin protein 22	ENSG00000109099	5376	FALSE	-0.349683	11.1717	-6.69336	1.35392e-06	8.37131e-05	5.35422
TC0200007096.hg.1	FOSL2	FOS like 2, AP-1 transcription factor subunit	ENSG00000075426	2355	FALSE	-0.460014	8.11376	-6.68209	1.38729e-06	8.54681e-05	5.3299
TC0600014133.hg.1	TMEM151B	transmembrane protein 151B	ENSG00000178233	441151	FALSE	0.886357	4.49777	6.66325	1.44496e-06	8.8472e-05	5.28924
TC0200016433.hg.1	TMEM178A	transmembrane protein 178A	ENSG00000152154	130733	FALSE	-0.65812	7.49068	-6.66279	1.44638e-06	8.8472e-05	5.28826
TC1300007718.hg.1	GPC6	glypican 6	ENSG00000183098	10082	FALSE	-0.460413	8.06334	-6.66017	1.45461e-06	8.86587e-05	5.28259
TC1200012680.hg.1	ACSS3	acyl-CoA synthetase short chain family member 3	ENSG00000111058	79611	FALSE	-0.404805	8.71202	-6.65427	1.4733e-06	8.94795e-05	5.26985
TC1000007625.hg.1	PRKG1	protein kinase cGMP-dependent 1	ENSG00000185532	5592	FALSE	-0.509941	8.60752	-6.64782	1.49403e-06	9.04177e-05	5.2559
TC0400007582.hg.1	CRACD	capping protein inhibiting regulator of actin dynamics	ENSG00000109265	57482	FALSE	0.529055	8.37399	6.63927	1.52194e-06	9.17827e-05	5.23741
TC0700010321.hg.1	ETV1	ETS variant transcription factor 1	ENSG00000006468	2115	FALSE	0.321964	11.0453	6.63064	1.55067e-06	9.31873e-05	5.21874
TC0600014106.hg.1	CFB	complement factor B	ENSG00000243649	629	TRUE	-0.850129	5.3699	-6.62446	1.57158e-06	9.41134e-05	5.20537
TC0100016633.hg.1	RGS8	regulator of G protein signaling 8	ENSG00000135824	85397	FALSE	-0.81016	6.37977	-6.62077	1.5842e-06	9.45385e-05	5.19738
TC0900009414.hg.1	RFX3	regulatory factor X3	ENSG00000080298	5991	FALSE	0.447803	8.41779	6.61148	1.61645e-06	9.61285e-05	5.17726
TC0200015815.hg.1	EPHA4	EPH receptor A4	ENSG00000116106	2043	FALSE	-0.756095	7.20958	-6.60301	1.64642e-06	9.75718e-05	5.15892
TC0500007114.hg.1	RAI14	retinoic acid induced 14	ENSG00000039560	26064	FALSE	-0.387241	9.10242	-6.58918	1.69664e-06	0.000100069	5.12892
TC1400010195.hg.1	WARS1	tryptophanyl-tRNA synthetase 1	ENSG00000140105	7453	FALSE	-0.536225	8.82044	-6.58702	1.70464e-06	0.000100069	5.12423
TC0100013581.hg.1	SPOCD1	SPOC domain containing 1	ENSG00000134668	90853	FALSE	-0.603487	7.03841	-6.58663	1.70608e-06	0.000100069	5.12338
TC0300006446.hg.1	CNTN6	contactin 6	ENSG00000134115	27255	FALSE	-1.04895	5.19972	-6.57393	1.75383e-06	0.000102488	5.09582
TC0100012921.hg.1	DHRS3	dehydrogenase/reductase 3	ENSG00000162496	9249	TRUE	-0.738382	5.4067	-6.57249	1.7593e-06	0.000102488	5.09271
TC1300009249.hg.1	KLF12	Kruppel like factor 12	ENSG00000118922	11278	FALSE	0.519681	8.07251	6.56989	1.76929e-06	0.000102721	5.08705
TC1000012482.hg.1	ENTPD1	ectonucleoside triphosphate diphosphohydrolase 1	ENSG00000138185	953	FALSE	0.802356	6.19031	6.56142	1.80219e-06	0.000104277	5.06866
TC0300012676.hg.1	PCOLCE2	procollagen C-endopeptidase enhancer 2	ENSG00000163710	26577	FALSE	-0.54917	6.5444	-6.55726	1.81861e-06	0.000104873	5.05961
TC1400009351.hg.1	SIX1	SIX homeobox 1	ENSG00000126778	6495	FALSE	-1.34107	4.67731	-6.5204	1.97068e-06	0.000113261	4.97942
TC0600013395.hg.1	NMBR	neuromedin B receptor	ENSG00000135577	4829	FALSE	-1.01887	5.61736	-6.5164	1.98798e-06	0.000113873	4.9707
TC0100009408.hg.1	PIFO	primary cilia formation	ENSG00000173947	128344	FALSE	0.648483	7.5155	6.5076	2.02651e-06	0.000115428	4.95153
TC1600010656.hg.1	CENPT	centromere protein T	ENSG00000102901	80152	FALSE	-0.510741	7.58036	-6.50713	2.0286e-06	0.000115428	4.9505
TC0100017018.hg.1	ETNK2	ethanolamine kinase 2	ENSG00000143845	55224	FALSE	-1.0429	5.42917	-6.49317	2.09138e-06	0.000118606	4.92007
TC0100006931.hg.1	PDPN	podoplanin	ENSG00000162493	10630	FALSE	-0.732337	6.50999	-6.48056	2.14982e-06	0.000121518	4.89255
TC0200011023.hg.1	SP100	SP100 nuclear antigen	ENSG00000067066	6672	FALSE	-1.21473	6.16214	-6.47598	2.17146e-06	0.000122337	4.88256
TC0300013405.hg.1	C3orf70	chromosome 3 open reading frame 70	ENSG00000187068	285382	FALSE	0.538706	7.00381	6.47422	2.17983e-06	0.000122406	4.87871
TC2200008956.hg.1	PHF21B	PHD finger protein 21B	ENSG00000056487	112885	FALSE	0.675774	7.122	6.44118	2.34338e-06	0.00013116	4.80648
TC1000008881.hg.1	MXI1	MAX interactor 1, dimerization protein	ENSG00000119950	4601	FALSE	0.355955	9.50316	6.42766	2.41391e-06	0.000134668	4.77688
TC0600011945.hg.1	RCAN2	regulator of calcineurin 2	ENSG00000172348	10231	FALSE	0.868125	5.95371	6.42578	2.42385e-06	0.000134783	4.77277
TC0600007677.hg.1	HLA-DPB1	major histocompatibility complex, class II, DP beta 1	ENSG00000223865	3115	TRUE	-1.12315	5.01583	-6.42271	2.44025e-06	0.000135256	4.76604
TC0400007868.hg.1	PARM1	prostate androgen-regulated mucin-like protein 1	ENSG00000169116	25849	FALSE	0.965929	5.135	6.41654	2.47349e-06	0.000136656	4.75253
TC1500010854.hg.1	GPR176	G protein-coupled receptor 176	ENSG00000166073	11245	FALSE	-0.680672	7.10163	-6.41039	2.50713e-06	0.000138069	4.73905
TC1700010849.hg.1	EFTUD2	elongation factor Tu GTP binding domain containing 2	ENSG00000108883	9343	FALSE	-0.395337	9.56269	-6.3998	2.56614e-06	0.000140866	4.71582
TC0600014089.hg.1	PGBD1	piggyBac transposable element derived 1	ENSG00000137338	84547	FALSE	0.32476	7.41306	6.39231	2.60867e-06	0.000142435	4.69941
TC0800010002.hg.1	DUSP4	dual specificity phosphatase 4	ENSG00000120875	1846	FALSE	-0.423166	8.45108	-6.39185	2.61136e-06	0.000142435	4.69838
TC0400010785.hg.1	IGFBP7	insulin like growth factor binding protein 7	ENSG00000163453	3490	FALSE	-0.4134	9.67023	-6.38282	2.6637e-06	0.000144829	4.67857
TC0600014284.hg.1	CPNE5	copine 5	ENSG00000124772	57699	FALSE	0.740917	6.72312	6.38091	2.67489e-06	0.000144977	4.67438
TC0700012296.hg.1	BMT2	base methyltransferase of 25S rRNA 2 homolog	ENSG00000164603	154743	FALSE	0.407612	7.55603	6.37633	2.70197e-06	0.000145983	4.66433
TC1600007096.hg.1	TMC7	transmembrane channel like 7	ENSG00000170537	79905	FALSE	-0.879489	5.70526	-6.37257	2.72443e-06	0.000146734	4.65606
TC0700007352.hg.1	BLVRA	biliverdin reductase A	ENSG00000106605	644	FALSE	-0.398659	8.26159	-6.36533	2.76821e-06	0.000148461	4.64015
TC0700006795.hg.1	AHR	aryl hydrocarbon receptor	ENSG00000106546	196	FALSE	-0.80655	6.32322	-6.3644	2.77384e-06	0.000148461	4.63812
TC1500006925.hg.1	THBS1	thrombospondin 1	ENSG00000137801	7057	FALSE	-0.345898	9.49234	-6.35296	2.8446e-06	0.000151774	4.61297
TC2100006674.hg.1	CHODL	chondrolectin	ENSG00000154645	140578	FALSE	-1.00054	5.71162	-6.34746	2.87931e-06	0.000152225	4.60086
TC0600014265.hg.1	CLIC1	chloride intracellular channel 1	ENSG00000213719	1192	TRUE	-0.317125	10.5138	-6.34738	2.87981e-06	0.000152225	4.60069
TC0600012709.hg.1	POPDC3	popeye domain containing 3	ENSG00000132429	64208	FALSE	-1.03727	5.14961	-6.34657	2.88497e-06	0.000152225	4.5989
TC0600008972.hg.1	PRDM1	PR/SET domain 1	ENSG00000057657	639	FALSE	-0.686974	6.97652	-6.346	2.88861e-06	0.000152225	4.59764
TC0X00009271.hg.1	ARX	aristaless related homeobox	ENSG00000004848	170302	FALSE	0.587061	7.84164	6.325	3.0255e-06	0.00015836	4.55142
TC1700009982.hg.1	USP32P2	ubiquitin specific peptidase 32 pseudogene 2	ENSG00000233327	220594	TRUE	0.464195	8.83744	6.32388	3.03295e-06	0.00015836	4.54896
TC0300007385.hg.1	BSN	bassoon presynaptic cytomatrix protein	ENSG00000164061	8927	FALSE	0.574186	6.81632	6.3237	3.03419e-06	0.00015836	4.54855
TC0800011844.hg.1	ADCY8	adenylate cyclase 8	ENSG00000155897	114	FALSE	0.943696	6.29412	6.32253	3.04201e-06	0.00015836	4.54598
TC0300008539.hg.1	SLC15A2	solute carrier family 15 member 2	ENSG00000163406	6565	FALSE	0.518482	8.73841	6.31765	3.07496e-06	0.000159197	4.53523
TC0400008972.hg.1	DCLK2	doublecortin like kinase 2	ENSG00000170390	166614	FALSE	0.433596	9.95509	6.31624	3.08456e-06	0.000159197	4.53212
TC0600014256.hg.1	GABBR1	gamma-aminobutyric acid type B receptor subunit 1	ENSG00000204681	2550	TRUE	0.412152	8.82636	6.31603	3.08597e-06	0.000159197	4.53166
TC1200012080.hg.1	TESC	tescalcin	ENSG00000088992	54997	FALSE	-0.895575	5.2912	-6.31462	3.09558e-06	0.000159213	4.52856
TC1100013030.hg.1	FLRT1	fibronectin leucine rich transmembrane protein 1	ENSG00000126500	23769	FALSE	0.483288	7.69064	6.30903	3.13403e-06	0.000160248	4.51623
TC1200012860.hg.1	LINC01089	long intergenic non-protein coding RNA 1089	ENSG00000212694	338799	FALSE	0.40862	8.98604	6.30897	3.13442e-06	0.000160248	4.51611
TC0300006905.hg.1	RBMS3	RNA binding motif single stranded interacting protein 3	ENSG00000144642	27303	FALSE	-0.517117	6.87451	-6.30468	3.16426e-06	0.000161293	4.50665
TC2100007821.hg.1	ADAMTS1	ADAM metallopeptidase with thrombospondin type 1 motif 1	ENSG00000154734	9510	FALSE	-1.17959	4.68607	-6.29423	3.23819e-06	0.000164571	4.48359
TC0300010989.hg.1	CSPG5	chondroitin sulfate proteoglycan 5	ENSG00000114646	10675	FALSE	0.48051	8.75561	6.2709	3.40966e-06	0.000172661	4.43209
TC0200009662.hg.1	TNFAIP6	TNF alpha induced protein 6	ENSG00000123610	7130	FALSE	-0.890446	3.64744	-6.26985	3.41754e-06	0.000172661	4.42978
TC1600007285.hg.1	HS3ST4	heparan sulfate-glucosamine 3-sulfotransferase 4	ENSG00000182601	9951	FALSE	-0.828053	6.37495	-6.26618	3.44549e-06	0.000173561	4.42165
TC1200011385.hg.1	LIN7A	lin-7 homolog A, crumbs cell polarity complex component	ENSG00000111052	8825	FALSE	-0.768309	6.85356	-6.25791	3.50909e-06	0.000176219	4.40339
TC1700011687.hg.1	BTBD17	BTB domain containing 17	ENSG00000204347	388419	FALSE	0.80796	5.51617	6.25666	3.51882e-06	0.000176219	4.40063
TC0100017258.hg.1	BATF3	basic leucine zipper ATF-like transcription factor 3	ENSG00000123685	55509	FALSE	-0.502555	8.24531	-6.23698	3.6757e-06	0.00018305	4.35709
TC0400011548.hg.1	LEF1	lymphoid enhancer binding factor 1	ENSG00000138795	51176	FALSE	-0.554119	6.91887	-6.23687	3.6766e-06	0.00018305	4.35684
TC0X00009576.hg.1	SYN1	synapsin I	ENSG00000008056	6853	FALSE	0.853923	5.74533	6.23261	3.7115e-06	0.000184252	4.34741
TC0300007596.hg.1	FLNB	filamin B	ENSG00000136068	2317	FALSE	-0.49905	7.61797	-6.20955	3.90639e-06	0.000192911	4.29633
TC0100017043.hg.1	LRRN2	leucine rich repeat neuronal 2	ENSG00000170382	10446	FALSE	0.625695	6.8957	6.20931	3.90846e-06	0.000192911	4.2958
TC0900012167.hg.1	GSN	gelsolin	ENSG00000148180	2934	FALSE	0.424327	8.72293	6.19425	4.0414e-06	0.0001989	4.26241
TC1900008694.hg.1	ZNF610	zinc finger protein 610	ENSG00000167554	162963	FALSE	0.530361	7.5477	6.1756	4.2125e-06	0.000206726	4.22102
TC1100007273.hg.1	CD44	CD44 molecule (Indian blood group)	ENSG00000026508	960	FALSE	-0.348747	10.1507	-6.1712	4.25396e-06	0.000208165	4.21125
TC0400012621.hg.1	ACSL1	acyl-CoA synthetase long chain family member 1	ENSG00000151726	2180	FALSE	-0.691255	5.8084	-6.15963	4.36497e-06	0.000212988	4.18554
TC2000009149.hg.1	PTPRT	protein tyrosine phosphatase receptor type T	ENSG00000196090	11122	FALSE	0.540576	6.48658	6.15078	4.45189e-06	0.000216612	4.16586
TC0700008090.hg.1	HSPB1	heat shock protein family B (small) member 1	ENSG00000106211	3315	FALSE	-0.343509	10.5918	-6.14799	4.47964e-06	0.000217345	4.15965
TC1100006911.hg.1	SPON1	spondin 1	ENSG00000262655	10418	FALSE	0.795391	4.97581	6.14652	4.49434e-06	0.000217442	4.15639
TC0500009108.hg.1	GPX3	glutathione peroxidase 3	ENSG00000211445	2878	FALSE	-0.713067	6.78613	-6.14384	4.52125e-06	0.000218128	4.15043
TC0900011340.hg.1	ASTN2	astrotactin 2	ENSG00000148219	23245	FALSE	0.402602	7.66902	6.14082	4.55175e-06	0.000218983	4.14372
TC0200008806.hg.1	LIMS1	LIM zinc finger domain containing 1	ENSG00000169756	3987	FALSE	-0.591842	7.38414	-6.13744	4.58614e-06	0.000220019	4.1362
TC1900011774.hg.1	EMP3	epithelial membrane protein 3	ENSG00000142227	2014	FALSE	-0.411932	9.66855	-6.1332	4.62979e-06	0.000221493	4.12675
TC2200008055.hg.1	PI4KA	phosphatidylinositol 4-kinase alpha	ENSG00000241973	5297	FALSE	0.344688	9.547	6.12298	4.73646e-06	0.00022554	4.10402
TC0100015871.hg.1	S100A16	S100 calcium binding protein A16	ENSG00000188643	140576	FALSE	-0.564929	8.53934	-6.12258	4.74073e-06	0.00022554	4.10312
TC0100006483.hg.1	ISG15	ISG15 ubiquitin like modifier	ENSG00000187608	9636	FALSE	-0.961861	7.62536	-6.09596	5.03099e-06	0.000238686	4.04381
TC1000008397.hg.1	IFIT3	interferon induced protein with tetratricopeptide repeats 3	ENSG00000119917	3437	FALSE	-0.707428	7.26212	-6.09462	5.04617e-06	0.000238745	4.0408
TC1200010413.hg.1	ABCD2	ATP binding cassette subfamily D member 2	ENSG00000173208	225	FALSE	0.641903	6.39545	6.08118	5.20005e-06	0.000245348	4.01082
TC0600006967.hg.1	EDN1	endothelin 1	ENSG00000078401	1906	FALSE	-0.705482	5.98242	-6.07938	5.22097e-06	0.000245658	4.00682
TC1500010082.hg.1	CSPG4	chondroitin sulfate proteoglycan 4	ENSG00000173546	1464	FALSE	-0.696691	6.20474	-6.0588	5.46705e-06	0.000256532	3.96086
TC0900011217.hg.1	PTBP3	polypyrimidine tract binding protein 3	ENSG00000119314	9991	FALSE	-0.382357	7.94555	-6.05576	5.50435e-06	0.000257577	3.95407
TC1000007776.hg.1	ZNF365	zinc finger protein 365	ENSG00000138311	22891	FALSE	-0.595432	6.8902	-6.04698	5.61363e-06	0.000261974	3.93445
TC1300008688.hg.1	FOXO1	forkhead box O1	ENSG00000150907	2308	FALSE	0.507066	6.72016	6.02521	5.89447e-06	0.000274333	3.88574
TC0200010165.hg.1	PPP1R1C	protein phosphatase 1 regulatory inhibitor subunit 1C	ENSG00000150722	151242	FALSE	0.468128	8.20635	6.00902	6.11245e-06	0.000283707	3.84951
TC1900006626.hg.1	CELF5	CUGBP Elav-like family member 5	ENSG00000161082	60680	FALSE	0.860716	7.31226	6.00579	6.15696e-06	0.000285001	3.84227
TC0100010609.hg.1	DNM3	dynamin 3	ENSG00000197959	26052	FALSE	0.554315	6.62961	5.98657	6.42859e-06	0.000296772	3.79919
TC0500011352.hg.1	EDIL3	EGF like repeats and discoidin domains 3	ENSG00000164176	10085	FALSE	-1.18879	3.96387	-5.98211	6.49331e-06	0.000298954	3.7892
TC1600011228.hg.1	PIEZO1	piezo type mechanosensitive ion channel component 1	ENSG00000103335	9780	FALSE	-0.441047	7.58098	-5.9739	6.61426e-06	0.000303706	3.77078
TC1900009240.hg.1	GNG7	G protein subunit gamma 7	ENSG00000176533	2788	FALSE	0.363714	10.2245	5.96875	6.69135e-06	0.000306424	3.75922
TC0100006954.hg.1	KAZN	kazrin, periplakin interacting protein	ENSG00000189337	23254	FALSE	0.434046	7.89199	5.96359	6.76953e-06	0.000309178	3.74763
TC0X00010982.hg.1	CDR1	cerebellar degeneration related protein 1	ENSG00000288642	1038	FALSE	0.621815	8.69703	5.95426	6.9132e-06	0.000314349	3.72668
TC0400010033.hg.1	WDR1	WD repeat domain 1	ENSG00000071127	9948	FALSE	-0.301787	9.9902	-5.95386	6.91946e-06	0.000314349	3.72578
TC0200013298.hg.1	ST3GAL5	ST3 beta-galactoside alpha-2,3-sialyltransferase 5	ENSG00000115525	8869	FALSE	0.470815	7.44285	5.95152	6.95593e-06	0.00031517	3.72053
TC1000007132.hg.1	BAMBI	BMP and activin membrane bound inhibitor	ENSG00000095739	25805	FALSE	0.707373	6.56931	5.94789	7.0131e-06	0.000316852	3.71237
TC0200010216.hg.1	ITGAV	integrin subunit alpha V	ENSG00000138448	3685	FALSE	-0.635454	6.88897	-5.94681	7.03006e-06	0.000316852	3.70996
TC1000011574.hg.1	LOXL4	lysyl oxidase like 4	ENSG00000138131	84171	FALSE	-0.841688	5.62566	-5.94253	7.09815e-06	0.000319081	3.70034
TC0500008175.hg.1	RGMB	repulsive guidance molecule BMP co-receptor b	ENSG00000174136	285704	FALSE	0.390223	8.44343	5.94058	7.12945e-06	0.00031935	3.69595
TC1700006524.hg.1	SERPINF1	serpin family F member 1	ENSG00000132386	5176	TRUE	-0.978582	7.46066	-5.93984	7.14142e-06	0.00031935	3.69428
TC1200007804.hg.1	METTL7B	methyltransferase like 7B	ENSG00000170439	196410	FALSE	0.514276	8.29518	5.93056	7.29223e-06	0.000324449	3.67343
TC0200012499.hg.1	MCFD2	multiple coagulation factor deficiency 2, ER cargo receptor complex subunit	ENSG00000180398	90411	FALSE	-0.338112	8.85016	-5.92974	7.30574e-06	0.000324449	3.67158
TC0300011525.hg.1	RYBP	RING1 and YY1 binding protein	ENSG00000163602	23429	TRUE	0.317364	9.21203	5.92934	7.31227e-06	0.000324449	3.67069
TC1200008731.hg.1	RFX4	regulatory factor X4	ENSG00000111783	5992	FALSE	0.344146	10.3112	5.92533	7.37875e-06	0.000326552	3.66166
TC1100007868.hg.1	GNG3	G protein subunit gamma 3	ENSG00000162188	2785	FALSE	0.358213	7.97281	5.90725	7.6859e-06	0.000339269	3.62098
TC0500007349.hg.1	ISL1	ISL LIM homeobox 1	ENSG00000016082	3670	FALSE	0.815024	6.07487	5.89925	7.82587e-06	0.00034456	3.60298
TC0900010284.hg.1	ANKRD20A1	ankyrin repeat domain 20 family member A1	ENSG00000260691	84210	TRUE	0.590851	7.5083	5.89479	7.90519e-06	0.00034716	3.59292
TC0500013211.hg.1	APC	APC regulator of WNT signaling pathway	ENSG00000134982	324	FALSE	0.358308	10.503	5.89274	7.94186e-06	0.000347734	3.5883
TC0600007862.hg.1	PIM1	Pim-1 proto-oncogene, serine/threonine kinase	ENSG00000137193	5292	FALSE	-0.627646	6.62971	-5.89179	7.95889e-06	0.000347734	3.58616
TC1800007471.hg.1	PMAIP1	phorbol-12-myristate-13-acetate-induced protein 1	ENSG00000141682	5366	FALSE	-0.985055	5.07144	-5.87145	8.33309e-06	0.000363157	3.54033
TC0300013598.hg.1	LRRC15	leucine rich repeat containing 15	ENSG00000172061	131578	FALSE	-0.831811	7.16507	-5.87026	8.35566e-06	0.000363217	3.53764
TC1300007565.hg.1	SLAIN1	SLAIN motif family member 1	ENSG00000139737	122060	FALSE	0.461191	9.2058	5.86469	8.46153e-06	0.000366888	3.52508
TC0100010863.hg.1	LAMC1	laminin subunit gamma 1	ENSG00000135862	3915	FALSE	-0.489311	8.79974	-5.85584	8.63265e-06	0.000373362	3.50511
TC0600012059.hg.1	GSTA4	glutathione S-transferase alpha 4	ENSG00000170899	2941	FALSE	0.309877	8.55852	5.84713	8.80442e-06	0.000379832	3.48546
TC0700008265.hg.1	ADAM22	ADAM metallopeptidase domain 22	ENSG00000008277	53616	FALSE	0.469728	7.55561	5.84375	8.87199e-06	0.000381785	3.47783
TC1000011114.hg.1	KCNMA1	potassium calcium-activated channel subfamily M alpha 1	ENSG00000156113	3778	FALSE	-0.342026	7.94838	-5.82914	9.17053e-06	0.000393643	3.44482
TC0600011381.hg.1	FLOT1	flotillin 1	ENSG00000137312	10211	TRUE	-0.547809	7.95004	-5.81786	9.40788e-06	0.000402713	3.41934
TC0500013246.hg.1	PCDHB10	protocadherin beta 10	ENSG00000120324	56126	FALSE	0.562741	7.43996	5.81688	9.42884e-06	0.000402713	3.41712
TC0300013461.hg.1	MASP1	MBL associated serine protease 1	ENSG00000127241	5648	FALSE	0.590127	6.16408	5.79253	9.9644e-06	0.000424528	3.36203
TC0500013301.hg.1	DAB2	DAB adaptor protein 2	ENSG00000153071	1601	FALSE	-0.524704	6.26464	-5.78888	1.00473e-05	0.000426997	3.35377
TC1500010888.hg.1	PARP6	poly(ADP-ribose) polymerase family member 6	ENSG00000137817	56965	FALSE	0.307383	9.50878	5.78103	1.02279e-05	0.000433598	3.336
TC0500012107.hg.1	CXCL14	C-X-C motif chemokine ligand 14	ENSG00000145824	9547	FALSE	-0.399317	9.04741	-5.7537	1.08832e-05	0.000460241	3.27407
TC0100007361.hg.1	GRHL3	grainyhead like transcription factor 3	ENSG00000158055	57822	FALSE	0.429441	9.08756	5.75118	1.09459e-05	0.000461749	3.26835
TC1500007814.hg.1	NEO1	neogenin 1	ENSG00000067141	4756	FALSE	0.436319	8.98542	5.74672	1.10574e-05	0.000463807	3.25824
TC1000008054.hg.1	PLAU	plasminogen activator, urokinase	ENSG00000122861	5328	FALSE	-0.630047	6.85148	-5.74663	1.10597e-05	0.000463807	3.25804
TC0100015819.hg.1	S100A10	S100 calcium binding protein A10	ENSG00000197747	6281	FALSE	-0.43845	9.88308	-5.74598	1.10759e-05	0.000463807	3.25658
TC0700011796.hg.1	SAMD9	sterile alpha motif domain containing 9	ENSG00000205413	54809	FALSE	-0.691902	6.56999	-5.73727	1.12976e-05	0.000471936	3.23682
TC1000010273.hg.1	NRP1	neuropilin 1	ENSG00000099250	8829	FALSE	-0.369823	9.22026	-5.71759	1.18155e-05	0.000492371	3.19213
TC1200011460.hg.1	KITLG	KIT ligand	ENSG00000049130	4254	FALSE	0.449894	7.69253	5.71183	1.19714e-05	0.000497657	3.17906
TC1600011378.hg.1	MVP	major vault protein	ENSG00000013364	9961	TRUE	-0.687765	8.32511	-5.70853	1.20619e-05	0.000499898	3.17156
TC1400007566.hg.1	SMOC1	SPARC related modular calcium binding 1	ENSG00000198732	64093	FALSE	0.256443	11.5912	5.70774	1.20837e-05	0.000499898	3.16975
TC1300008858.hg.1	HTR2A	5-hydroxytryptamine receptor 2A	ENSG00000102468	3356	FALSE	-0.812935	4.28476	-5.70496	1.21603e-05	0.000501855	3.16346
TC1800009275.hg.1	ST8SIA5	ST8 alpha-N-acetyl-neuraminide alpha-2,8-sialyltransferase 5	ENSG00000101638	29906	FALSE	0.341325	9.78095	5.70274	1.22221e-05	0.000502022	3.15841
TC1300009924.hg.1	GAS6	growth arrest specific 6	ENSG00000183087	2621	FALSE	-0.454607	8.09017	-5.70172	1.22505e-05	0.000502022	3.15609
TC0100013182.hg.1	CAMK2N1	calcium/calmodulin dependent protein kinase II inhibitor 1	ENSG00000162545	55450	FALSE	0.370818	8.9983	5.70139	1.22598e-05	0.000502022	3.15533
TC0900011192.hg.1	LPAR1	lysophosphatidic acid receptor 1	ENSG00000198121	1902	FALSE	0.662079	7.09703	5.70039	1.22877e-05	0.000502022	3.15307
TC1800007394.hg.1	ST8SIA3	ST8 alpha-N-acetyl-neuraminide alpha-2,8-sialyltransferase 3	ENSG00000177511	51046	FALSE	0.555259	8.57183	5.69956	1.23109e-05	0.000502022	3.15118
TC0700013338.hg.1	GLCCI1	glucocorticoid induced 1	ENSG00000106415	113263	FALSE	0.594551	7.39132	5.6977	1.23633e-05	0.000502961	3.14695
TC0900011461.hg.1	STRBP	spermatid perinuclear RNA binding protein	ENSG00000165209	55342	TRUE	0.405097	7.92844	5.68221	1.28078e-05	0.000518711	3.11174
TC0200009060.hg.1	STEAP3	STEAP3 metalloreductase	ENSG00000115107	55240	FALSE	-0.589276	7.4577	-5.6821	1.2811e-05	0.000518711	3.11149
TC0500011648.hg.1	EFNA5	ephrin A5	ENSG00000184349	1946	FALSE	0.39291	8.64141	5.67928	1.28939e-05	0.000520836	3.10506
TC2100007208.hg.1	MX1	MX dynamin like GTPase 1	ENSG00000157601	4599	FALSE	-0.741195	6.22848	-5.67408	1.30479e-05	0.000525307	3.09323
TC2000009802.hg.1	NKAIN4	sodium/potassium transporting ATPase interacting 4	ENSG00000101198	128414	FALSE	0.412538	8.27103	5.67347	1.3066e-05	0.000525307	3.09185
TC0400012437.hg.1	SCRG1	stimulator of chondrogenesis 1	ENSG00000164106	11341	FALSE	-0.439258	9.81767	-5.66988	1.31736e-05	0.000528395	3.08367
TC0500011225.hg.1	LHFPL2	LHFPL tetraspan subfamily member 2	ENSG00000145685	10184	FALSE	-0.323029	7.99247	-5.66836	1.32192e-05	0.000528986	3.08022
TC0400010636.hg.1	OCIAD2	OCIA domain containing 2	ENSG00000145247	132299	FALSE	-0.764158	4.15023	-5.65941	1.34921e-05	0.000538648	3.05986
TC0400010989.hg.1	ADAMTS3	ADAM metallopeptidase with thrombospondin type 1 motif 3	ENSG00000156140	9508	FALSE	0.63863	6.4712	5.65193	1.37247e-05	0.000546659	3.04282
TC1600008034.hg.1	NDRG4	NDRG family member 4	ENSG00000103034	65009	FALSE	0.350798	8.32729	5.643	1.40077e-05	0.000556636	3.02248
TC1100012906.hg.1	IGSF9B	immunoglobulin superfamily member 9B	ENSG00000080854	22997	FALSE	0.411511	7.8717	5.63827	1.41602e-05	0.000561391	3.01169
TC0100010571.hg.1	PRRX1	paired related homeobox 1	ENSG00000116132	5396	FALSE	-0.39079	8.9722	-5.63168	1.43752e-05	0.000568602	2.99667
TC0500009097.hg.1	SYNPO	synaptopodin	ENSG00000171992	11346	FALSE	-0.322138	8.97666	-5.62693	1.45323e-05	0.000573409	2.98584
TC0X00006686.hg.1	GRPR	gastrin releasing peptide receptor	ENSG00000126010	2925	FALSE	-0.59177	6.12105	-5.62598	1.45637e-05	0.000573409	2.98369
TC0300010676.hg.1	CLASP2	cytoplasmic linker associated protein 2	ENSG00000163539	23122	FALSE	0.656391	7.74411	5.62384	1.46351e-05	0.000574899	2.97881
TC0700011797.hg.1	SAMD9L	sterile alpha motif domain containing 9 like	ENSG00000177409	219285	FALSE	-0.45955	7.63594	-5.61032	1.50952e-05	0.000591615	2.94797
TC1600007931.hg.1	LPCAT2	lysophosphatidylcholine acyltransferase 2	ENSG00000087253	54947	FALSE	-0.574031	9.25638	-5.60662	1.52236e-05	0.000595284	2.93953
TC1000008489.hg.1	LGI1	leucine rich glioma inactivated 1	ENSG00000108231	9211	FALSE	0.512934	6.24249	5.59544	1.56183e-05	0.000609326	2.91402
TC1200010908.hg.1	STAT2	signal transducer and activator of transcription 2	ENSG00000170581	6773	FALSE	-0.359876	8.42035	-5.59171	1.57524e-05	0.000612993	2.9055
TC0200016416.hg.1	SLC35F6	solute carrier family 35 member F6	ENSG00000213699	54978	FALSE	-0.352292	9.01687	-5.59084	1.57839e-05	0.000612993	2.90351
TC1300008487.hg.1	SLC7A1	solute carrier family 7 member 1	ENSG00000139514	6541	FALSE	-0.549104	8.54358	-5.58543	1.5981e-05	0.000619246	2.89114
TC0200014719.hg.1	BAZ2B	bromodomain adjacent to zinc finger domain 2B	ENSG00000123636	29994	TRUE	0.312331	9.5154	5.58269	1.60817e-05	0.00062174	2.88489
TC0700009333.hg.1	UBN2	ubinuclein 2	ENSG00000157741	254048	FALSE	0.41312	8.33599	5.58117	1.61376e-05	0.000622498	2.88143
TC1100008994.hg.1	C11orf87	chromosome 11 open reading frame 87	ENSG00000185742	399947	FALSE	1.05664	5.63358	5.5737	1.64163e-05	0.000631825	2.86437
TC1100012957.hg.1	TRIM22	tripartite motif containing 22	ENSG00000132274	10346	FALSE	-0.603543	7.4197	-5.56311	1.682e-05	0.000645185	2.84016
TC1400009329.hg.1	RTN1	reticulon 1	ENSG00000139970	6252	FALSE	0.313344	10.8172	5.56263	1.68388e-05	0.000645185	2.83905
TC0X00007308.hg.1	GPR173	G protein-coupled receptor 173	ENSG00000184194	54328	FALSE	0.433311	7.12167	5.56106	1.68994e-05	0.000646061	2.83547
TC0100013949.hg.1	SLC6A9	solute carrier family 6 member 9	ENSG00000196517	6536	FALSE	0.440734	8.18115	5.55712	1.70527e-05	0.000650471	2.82647
TC0800012396.hg.1	FBXO16	F-box protein 16	ENSG00000214050	157574	FALSE	0.40057	7.517	5.55375	1.71852e-05	0.00065407	2.81876
TC2200008302.hg.1	TPST2	tyrosylprotein sulfotransferase 2	ENSG00000128294	8459	FALSE	-0.454324	8.60989	-5.55038	1.73188e-05	0.000657691	2.81105
TC1200010182.hg.1	BHLHE41	basic helix-loop-helix family member e41	ENSG00000123095	79365	FALSE	-0.499185	7.78771	-5.53394	1.79849e-05	0.000681476	2.77345
TC1400009529.hg.1	ACTN1	actinin alpha 1	ENSG00000072110	87	FALSE	-0.278761	10.3091	-5.52988	1.81536e-05	0.000686349	2.76415
TC0200006725.hg.1	GREB1	growth regulating estrogen receptor binding 1	ENSG00000196208	9687	FALSE	0.479297	6.88124	5.5282	1.82237e-05	0.000687483	2.76031
TC0300012208.hg.1	HACD2	3-hydroxyacyl-CoA dehydratase 2	ENSG00000206527	201562	FALSE	-0.303912	10.1157	-5.5251	1.83542e-05	0.000690884	2.7532
TC0100018443.hg.1	PLPP3	phospholipid phosphatase 3	ENSG00000162407	8613	FALSE	0.301681	10.5438	5.52122	1.85183e-05	0.000695535	2.74433
TC1200007365.hg.1	PDZRN4	PDZ domain containing ring finger 4	ENSG00000165966	29951	FALSE	0.700819	5.88265	5.51742	1.86812e-05	0.000700114	2.73561
TC1900011827.hg.1	ZNF8	zinc finger protein 8	ENSG00000278129	7554	FALSE	0.398684	7.40256	5.50676	1.91447e-05	0.000715921	2.7112
TC0500012947.hg.1	GPRIN1	G protein regulated inducer of neurite outgrowth 1	ENSG00000169258	114787	FALSE	0.645497	7.15774	5.4975	1.95569e-05	0.00072974	2.68998
TC1800008349.hg.1	CHST9	carbohydrate sulfotransferase 9	ENSG00000154080	83539	FALSE	0.751864	5.912	5.49414	1.97085e-05	0.000733798	2.68229
TC1500010864.hg.1	GATM	glycine amidinotransferase	ENSG00000171766	2628	FALSE	0.972336	5.52299	5.48799	1.99893e-05	0.00074264	2.6682
TC2000007213.hg.1	MMP24	matrix metallopeptidase 24	ENSG00000125966	10893	FALSE	0.464828	7.3355	5.48596	2.0083e-05	0.000744506	2.66354
TC0200010837.hg.1	ANKZF1	ankyrin repeat and zinc finger peptidyl tRNA hydrolase 1	ENSG00000163516	55139	FALSE	0.387007	7.91248	5.48193	2.02704e-05	0.000749829	2.65429
TC2000008587.hg.1	RALGAPA2	Ral GTPase activating protein catalytic subunit alpha 2	ENSG00000188559	57186	FALSE	0.32357	9.09811	5.47884	2.0415e-05	0.000753553	2.64721
TC1900011874.hg.1	ZNF878	zinc finger protein 878	ENSG00000257446	729747	FALSE	-0.614126	4.94991	-5.47501	2.0596e-05	0.000758596	2.63842
TC0100017193.hg.1	KCNH1	potassium voltage-gated channel subfamily H member 1	ENSG00000143473	3756	FALSE	-0.609579	6.52946	-5.46587	2.1034e-05	0.000773066	2.61746
TC0200016648.hg.1	CDC42EP3	CDC42 effector protein 3	ENSG00000163171	10602	FALSE	-0.38329	8.13408	-5.46169	2.12378e-05	0.000777091	2.60786
TC0300012504.hg.1	KY	kyphoscoliosis peptidase	ENSG00000174611	339855	FALSE	0.541839	6.65583	5.46159	2.12429e-05	0.000777091	2.60762
TC0900006560.hg.1	PDCD1LG2	programmed cell death 1 ligand 2	ENSG00000197646	80380	FALSE	-0.694875	5.36563	-5.46032	2.13048e-05	0.000777091	2.60473
TC0300012109.hg.1	IGSF11	immunoglobulin superfamily member 11	ENSG00000144847	152404	FALSE	0.378005	8.88204	5.45991	2.1325e-05	0.000777091	2.60378
TC0100018367.hg.1	CHRM3	cholinergic receptor muscarinic 3	ENSG00000133019	1131	FALSE	-0.621093	6.4538	-5.45677	2.148e-05	0.000781079	2.59657
TC1500010251.hg.1	HOMER2	homer scaffold protein 2	ENSG00000103942	9455	FALSE	-0.409571	8.31181	-5.45276	2.16796e-05	0.000786022	2.58736
TC0900007472.hg.1	ANKRD20A3P	ankyrin repeat domain 20 family member A3, pseudogene		441425	TRUE	0.597788	6.19293	5.45219	2.17077e-05	0.000786022	2.58607
TC0900008716.hg.1	NEK6	NIMA related kinase 6	ENSG00000119408	10783	FALSE	-0.313838	9.65485	-5.44622	2.20088e-05	0.00079524	2.57235
TC1700009040.hg.1	SYNGR2	synaptogyrin 2	ENSG00000108639	9144	FALSE	-0.542273	8.00477	-5.44294	2.2176e-05	0.000799598	2.56481
TC0900009685.hg.1	HACD4	3-hydroxyacyl-CoA dehydratase 4	ENSG00000188921	401494	FALSE	-0.751134	4.70297	-5.43058	2.28176e-05	0.000821001	2.53642
TC1200012594.hg.1	ZNF705A	zinc finger protein 705A	ENSG00000196946	440077	TRUE	0.474592	8.5625	5.41797	2.34912e-05	0.000843466	2.50745
TC0700009065.hg.1	CCDC136	coiled-coil domain containing 136	ENSG00000128596	64753	FALSE	0.324389	8.19073	5.4128	2.37734e-05	0.000851815	2.49556
TC2200006703.hg.1	HIC2	HIC ZBTB transcriptional repressor 2	ENSG00000169635	23119	FALSE	0.407303	8.07128	5.40712	2.40873e-05	0.000861259	2.4825
TC1900006684.hg.1	SHD	Src homology 2 domain containing transforming protein D	ENSG00000105251	56961	FALSE	0.511936	7.94156	5.40598	2.41507e-05	0.000861728	2.47988
TC1200008601.hg.1	ANO4	anoctamin 4	ENSG00000151572	121601	TRUE	-0.6046	6.98817	-5.40392	2.42662e-05	0.000864048	2.47513
TC2200006517.hg.1	CECR2	CECR2 histone acetyl-lysine reader	ENSG00000099954	27443	FALSE	0.532984	8.28819	5.40251	2.43449e-05	0.000865052	2.47191
TC0300009122.hg.1	CPA3	carboxypeptidase A3	ENSG00000163751	1359	FALSE	-0.962432	4.02386	-5.39812	2.45932e-05	0.000872065	2.46181
TC0400008813.hg.1	MGST2	microsomal glutathione S-transferase 2	ENSG00000085871	4258	FALSE	-0.322978	8.46335	-5.39329	2.48692e-05	0.000880031	2.4507
TC1100006923.hg.1	PDE3B	phosphodiesterase 3B	ENSG00000152270	5140	FALSE	0.638857	6.21071	5.39153	2.49709e-05	0.000880877	2.44664
TC1600010561.hg.1	CDH11	cadherin 11	ENSG00000140937	1009	FALSE	-0.572108	5.99645	-5.39109	2.4996e-05	0.000880877	2.44564
TC1700012434.hg.1	HOXB7	homeobox B7	ENSG00000260027	3217	FALSE	-0.844175	4.48999	-5.38779	2.51875e-05	0.000885805	2.43804
TC2000006852.hg.1	SLC24A3	solute carrier family 24 member 3	ENSG00000185052	57419	FALSE	0.647101	5.47011	5.38375	2.54239e-05	0.000890906	2.42874
TC1600006658.hg.1	IL32	interleukin 32	ENSG00000008517	9235	FALSE	-0.476652	7.09853	-5.38353	2.54366e-05	0.000890906	2.42824
TC0700007098.hg.1	GARS1	glycyl-tRNA synthetase 1	ENSG00000106105	2617	FALSE	-0.293751	10.5197	-5.38229	2.55097e-05	0.000891641	2.42539
TC0700012797.hg.1	PARP12	poly(ADP-ribose) polymerase family member 12	ENSG00000059378	64761	FALSE	-0.4908	7.81804	-5.379	2.57048e-05	0.000896631	2.4178
TC1900010008.hg.1	IQCN	IQ motif containing N	ENSG00000130518	80726	FALSE	0.61391	5.66084	5.37445	2.59768e-05	0.000904278	2.40732
TC0800009113.hg.1	PTP4A3	protein tyrosine phosphatase 4A3	ENSG00000184489	11156	TRUE	-0.322804	10.0847	-5.37242	2.60988e-05	0.000906683	2.40266
TC2200008594.hg.1	MYH9	myosin heavy chain 9	ENSG00000100345	4627	FALSE	-0.290904	9.99803	-5.36951	2.62752e-05	0.000910963	2.39595
TC1100011126.hg.1	PLAAT3	phospholipase A and acyltransferase 3	ENSG00000176485	11145	FALSE	-0.31848	9.45322	-5.36574	2.65053e-05	0.000917083	2.38728
TC0200010859.hg.1	SLC4A3	solute carrier family 4 member 3	ENSG00000114923	6508	FALSE	-0.346725	7.6715	-5.36216	2.6726e-05	0.000922856	2.37902
TC1700010723.hg.1	CAVIN1	caveolae associated protein 1	ENSG00000177469	284119	FALSE	-0.353549	7.90367	-5.36007	2.68556e-05	0.000925403	2.37421
TC1400009711.hg.1	NEK9	NIMA related kinase 9	ENSG00000119638	91754	FALSE	0.829736	5.39299	5.35923	2.69079e-05	0.000925403	2.37227
TC0200014620.hg.1	CACNB4	calcium voltage-gated channel auxiliary subunit beta 4	ENSG00000182389	785	FALSE	0.625538	6.46421	5.3572	2.70344e-05	0.000927892	2.3676
TC0100013028.hg.1	EPHA2	EPH receptor A2	ENSG00000142627	1969	FALSE	-0.367178	8.81516	-5.34693	2.76849e-05	0.000948319	2.34394
TC0400009376.hg.1	WDR17	WD repeat domain 17	ENSG00000150627	116966	FALSE	0.471662	8.3106	5.33952	2.81639e-05	0.000962801	2.32687
TC0100008664.hg.1	GADD45A	growth arrest and DNA damage inducible alpha	ENSG00000116717	1647	FALSE	-0.496121	8.14733	-5.33604	2.8392e-05	0.000968666	2.31884
TC1200012617.hg.1	FGD4	FYVE, RhoGEF and PH domain containing 4	ENSG00000139132	121512	FALSE	0.451014	9.61346	5.32361	2.92218e-05	0.000994993	2.29018
TC0600008109.hg.1	VEGFA	vascular endothelial growth factor A	ENSG00000112715	7422	FALSE	-0.393687	8.98603	-5.31382	2.98922e-05	0.0010158	2.2676
TC1100009533.hg.1	ADAMTS15	ADAM metallopeptidase with thrombospondin type 1 motif 15	ENSG00000166106	170689	FALSE	-0.440845	7.04038	-5.31073	3.01075e-05	0.00102109	2.26046
TC0600011508.hg.1	TAP1	transporter 1, ATP binding cassette subfamily B member	ENSG00000168394	6890	TRUE	-0.361741	8.387	-5.30929	3.02079e-05	0.00102247	2.25715
TC1500008983.hg.1	SLC12A6	solute carrier family 12 member 6	ENSG00000140199	9990	FALSE	0.404287	8.26232	5.30753	3.03314e-05	0.00102463	2.25309
TC0200009936.hg.1	GAD1	glutamate decarboxylase 1	ENSG00000128683	2571	FALSE	0.315644	9.94664	5.29756	3.10413e-05	0.00104654	2.23007
TC0500008055.hg.1	ADGRV1	adhesion G protein-coupled receptor V1	ENSG00000164199	84059	FALSE	0.766662	4.96081	5.29593	3.11587e-05	0.00104844	2.22632
TC1900006660.hg.1	ATCAY	ATCAY kinesin light chain interacting caytaxin	ENSG00000167654	85300	FALSE	0.568567	7.34968	5.29283	3.13837e-05	0.00105394	2.21916
TC0100011453.hg.1	G0S2	G0/G1 switch 2	ENSG00000123689	50486	FALSE	-0.530902	6.50312	-5.28367	3.20584e-05	0.0010739	2.198
TC0X00008785.hg.1	BGN	biglycan	ENSG00000182492	633	FALSE	-0.832317	5.99957	-5.28306	3.21034e-05	0.0010739	2.1966
TC0800012457.hg.1	TMEM65	transmembrane protein 65	ENSG00000164983	157378	FALSE	-0.379502	8.36228	-5.26864	3.31967e-05	0.0011083	2.16329
TC1300006715.hg.1	PAN3	poly(A) specific ribonuclease subunit PAN3	ENSG00000152520	255967	FALSE	0.341192	8.11473	5.26162	3.37428e-05	0.00112435	2.14706
TC0300008335.hg.1	TMPRSS7	transmembrane serine protease 7	ENSG00000176040	344805	FALSE	0.740993	5.58031	5.25888	3.39581e-05	0.00112932	2.14073
TC1100010026.hg.1	LMO1	LIM domain only 1	ENSG00000166407	4004	FALSE	-0.664768	6.38069	-5.25454	3.4302e-05	0.00113855	2.13071
TC0700012734.hg.1	CREB3L2	cAMP responsive element binding protein 3 like 2	ENSG00000182158	64764	FALSE	-0.527668	7.31892	-5.25097	3.45877e-05	0.00114581	2.12246
TC0900012154.hg.1	TMEFF1	transmembrane protein with EGF like and two follistatin like domains 1	ENSG00000241697	8577	FALSE	0.487361	7.85171	5.24856	3.47826e-05	0.00114822	2.11687
TC0100010244.hg.1	IFI16	interferon gamma inducible protein 16	ENSG00000163565	3428	FALSE	-0.312246	10.2166	-5.24779	3.48444e-05	0.00114822	2.1151
TC1200010407.hg.1	KIF21A	kinesin family member 21A	ENSG00000139116	55605	FALSE	0.381569	8.96955	5.24758	3.48615e-05	0.00114822	2.11461
TC1500009508.hg.1	NEDD4	NEDD4 E3 ubiquitin protein ligase	ENSG00000069869	4734	FALSE	-0.627401	6.51146	-5.24252	3.5274e-05	0.00115957	2.10292
TC1700010019.hg.1	MFAP4	microfibril associated protein 4	ENSG00000166482	4239	FALSE	-0.621533	7.81916	-5.23709	3.57226e-05	0.00117207	2.09035
TC0800009856.hg.1	EGR3	early growth response 3	ENSG00000179388	1960	FALSE	0.777978	5.49149	5.23616	3.57993e-05	0.00117234	2.08821
TC1200010874.hg.1	MMP19	matrix metallopeptidase 19	ENSG00000123342	4327	FALSE	-0.817835	5.48723	-5.23529	3.58723e-05	0.00117249	2.08619
TC2000007509.hg.1	CTSA	cathepsin A	ENSG00000064601	5476	FALSE	-0.346032	8.91314	-5.21527	3.75822e-05	0.00122576	2.03988
TC1200007842.hg.1	SPRYD4	SPRY domain containing 4	ENSG00000176422	283377	FALSE	0.495376	6.75755	5.21455	3.76452e-05	0.00122576	2.03821
TC1900011987.hg.1	NOVA2	NOVA alternative splicing regulator 2	ENSG00000104967	4858	FALSE	0.326698	8.31954	5.19988	3.89531e-05	0.00126594	2.00425
TC0800011713.hg.1	MTSS1	MTSS I-BAR domain containing 1	ENSG00000170873	9788	FALSE	0.326973	9.68415	5.19598	3.93085e-05	0.00127507	1.99522
TC1500007980.hg.1	CHRNA5	cholinergic receptor nicotinic alpha 5 subunit	ENSG00000169684	1138	FALSE	-0.978408	4.86353	-5.19437	3.94564e-05	0.00127745	1.99149
TC0100015287.hg.1	LOC101928718	uncharacterized LOC101928718	ENSG00000284830	101928718	FALSE	0.690077	5.95666	5.18824	4.00242e-05	0.00129338	1.97728
TC2200008655.hg.1	CARD10	caspase recruitment domain family member 10	ENSG00000100065	29775	FALSE	-0.469046	6.20766	-5.18689	4.01505e-05	0.00129502	1.97415
TC0200016454.hg.1	SANBR	SANT and BTB domain regulator of CSR	ENSG00000162929	84542	FALSE	0.43348	8.83502	5.18151	4.06568e-05	0.00130889	1.96169
TC0400012903.hg.1	PROM1	prominin 1	ENSG00000007062	8842	FALSE	-0.385546	8.73287	-5.1806	4.07428e-05	0.0013092	1.95959
TC2000006688.hg.1	SNAP25	synaptosome associated protein 25	ENSG00000132639	6616	FALSE	0.885549	5.30109	5.17821	4.09707e-05	0.00131405	1.95405
TC0300013864.hg.1	PDIA5	protein disulfide isomerase family A member 5	ENSG00000065485	10954	TRUE	-0.317489	8.69035	-5.17522	4.12573e-05	0.00132077	1.94712
TC1300006594.hg.1	TNFRSF19	TNF receptor superfamily member 19	ENSG00000127863	55504	FALSE	-0.725055	7.01892	-5.16533	4.22196e-05	0.00134906	1.9242
TC1200010976.hg.1	AGAP2	ArfGAP with GTPase domain, ankyrin repeat and PH domain 2	ENSG00000135439	116986	FALSE	0.557011	7.7591	5.1644	4.23106e-05	0.00134945	1.92206
TC0700012798.hg.1	KDM7A	lysine demethylase 7A	ENSG00000006459	80853	FALSE	0.578891	7.48603	5.16161	4.25869e-05	0.00135573	1.91558
TC0600007495.hg.1	HLA-A	major histocompatibility complex, class I, A	ENSG00000206503	3105	TRUE	-0.368524	7.45985	-5.1579	4.2957e-05	0.00136498	1.90698
TC1100006516.hg.1	BRSK2	BR serine/threonine kinase 2	ENSG00000174672	9024	FALSE	0.431531	6.64005	5.13541	4.52715e-05	0.00143586	1.85482
TC0300013977.hg.1	C3orf62	chromosome 3 open reading frame 62	ENSG00000188315	375341	FALSE	0.453171	7.04808	5.13371	4.54513e-05	0.00143861	1.85088
TC0500008470.hg.1	SNCAIP	synuclein alpha interacting protein	ENSG00000064692	9627	FALSE	0.297277	9.6296	5.13301	4.5526e-05	0.00143861	1.84925
TC0300011084.hg.1	CAMKV	CaM kinase like vesicle associated	ENSG00000164076	79012	FALSE	0.83291	5.42867	5.12647	4.62265e-05	0.00145805	1.83408
TC1900006507.hg.1	CNN2	calponin 2	ENSG00000064666	1265	FALSE	-0.498749	8.37202	-5.12415	4.64771e-05	0.00146143	1.8287
TC1700006767.hg.1	WRAP53	WD repeat containing antisense to TP53	ENSG00000141499	55135	FALSE	0.322491	7.99402	5.1239	4.65043e-05	0.00146143	1.82812
TC0X00009427.hg.1	BCOR	BCL6 corepressor	ENSG00000183337	54880	FALSE	0.377486	7.87282	5.12015	4.69127e-05	0.00147156	1.81943
TC1100013161.hg.1	CD59	CD59 molecule (CD59 blood group)	ENSG00000085063	966	FALSE	-0.252505	9.17029	-5.11741	4.72142e-05	0.00147831	1.81307
TC1600011422.hg.1	CLEC18A	C-type lectin domain family 18 member A	ENSG00000157322	348174	FALSE	-0.40832	7.91138	-5.11463	4.75214e-05	0.00148522	1.80662
TC0400010853.hg.1	TECRL	trans-2,3-enoyl-CoA reductase like	ENSG00000205678	253017	FALSE	0.820309	4.55794	5.1121	4.78033e-05	0.00149131	1.80074
TC1200006515.hg.1	TEAD4	TEA domain transcription factor 4	ENSG00000197905	7004	FALSE	-0.506816	6.11589	-5.10635	4.84498e-05	0.00150761	1.7874
TC2200006718.hg.1	SDF2L1	stromal cell derived factor 2 like 1	ENSG00000128228	23753	FALSE	-0.418345	7.66095	-5.10589	4.85019e-05	0.00150761	1.78633
TC1200007597.hg.1	COX14	cytochrome c oxidase assembly factor COX14	ENSG00000178449	84987	FALSE	0.322864	9.27375	5.09912	4.92759e-05	0.00152889	1.7706
TC0400009029.hg.1	FHDC1	FH2 domain containing 1	ENSG00000137460	85462	FALSE	-0.850227	6.02082	-5.09358	4.99177e-05	0.00154601	1.75774
TC2200009153.hg.1	DENND6B	DENN domain containing 6B	ENSG00000205593	414918	FALSE	0.387038	7.99172	5.09143	5.01697e-05	0.001551	1.75274
TC0300012718.hg.1	PLOD2	procollagen-lysine,2-oxoglutarate 5-dioxygenase 2	ENSG00000152952	5352	FALSE	-0.605558	8.03142	-5.0893	5.04194e-05	0.00155592	1.7478
TC0200010502.hg.1	FAM117B	family with sequence similarity 117 member B	ENSG00000138439	150864	FALSE	0.316249	9.32272	5.07598	5.20148e-05	0.00160226	1.71685
TC1200007425.hg.1	ARID2	AT-rich interaction domain 2	ENSG00000189079	196528	FALSE	0.280044	8.80207	5.07037	5.27018e-05	0.00162051	1.70382
TC1100012948.hg.1	IFITM2	interferon induced transmembrane protein 2	ENSG00000185201	10581	FALSE	-0.411439	7.45323	-5.06513	5.3352e-05	0.00163608	1.69164
TC0200007048.hg.1	MAPRE3	microtubule associated protein RP/EB family member 3	ENSG00000084764	22924	FALSE	0.37797	7.53381	5.06448	5.34336e-05	0.00163608	1.69012
TC1700007557.hg.1	CCL2	C-C motif chemokine ligand 2	ENSG00000108691	6347	FALSE	-0.311821	8.89631	-5.06345	5.35622e-05	0.00163608	1.68773
TC0200013750.hg.1	FHL2	four and a half LIM domains 2	ENSG00000115641	2274	FALSE	-0.510595	8.26438	-5.06251	5.36797e-05	0.00163608	1.68556
TC1700012073.hg.1	P4HB	prolyl 4-hydroxylase subunit beta	ENSG00000185624	5034	FALSE	-0.275752	9.34864	-5.06174	5.37773e-05	0.00163608	1.68375
TC2200009270.hg.1	APOBEC3B	apolipoprotein B mRNA editing enzyme catalytic subunit 3B	ENSG00000179750	9582	TRUE	-0.521648	6.99986	-5.0617	5.37814e-05	0.00163608	1.68368
TC1500010723.hg.1	CHAC1	ChaC glutathione specific gamma-glutamylcyclotransferase 1	ENSG00000128965	79094	FALSE	-0.455763	5.94121	-5.06038	5.39478e-05	0.00163824	1.68061
TC1300006861.hg.1	NBEA	neurobeachin	ENSG00000172915	26960	FALSE	0.547746	7.54143	5.0593	5.4085e-05	0.00163949	1.67809
TC0X00009384.hg.1	DYNLT3	dynein light chain Tctex-type 3	ENSG00000165169	6990	FALSE	-0.42648	5.70201	-5.05808	5.424e-05	0.00164129	1.67524
TC1600011360.hg.1	SYT17	synaptotagmin 17	ENSG00000103528	51760	FALSE	-0.290936	9.52514	-5.0516	5.50677e-05	0.00166339	1.6602
TC1300009488.hg.1	DCT	dopachrome tautomerase	ENSG00000080166	1638	FALSE	-0.373636	7.64693	-5.04932	5.53635e-05	0.00166939	1.65488
TC1200012744.hg.1	C1R	complement C1r	ENSG00000159403	715	TRUE	-0.582751	6.60534	-5.04788	5.55505e-05	0.00167208	1.65153
TC0X00010107.hg.1	ZDHHC15	zinc finger DHHC-type palmitoyltransferase 15	ENSG00000102383	158866	FALSE	0.304385	9.16785	5.04136	5.64046e-05	0.00169481	1.63638
TC0600011661.hg.1	STK38	serine/threonine kinase 38	ENSG00000112079	11329	FALSE	0.371585	9.0144	5.03626	5.7082e-05	0.00170932	1.62452
TC0900012157.hg.1	PALM2AKAP2	PALM2 and AKAP2 fusion	ENSG00000157654	445815	FALSE	-0.56803	7.22063	-5.03599	5.71178e-05	0.00170932	1.6239
TC1700010973.hg.1	COPZ2	COPI coat complex subunit zeta 2	ENSG00000005243	51226	FALSE	-0.863671	6.68688	-5.03548	5.71869e-05	0.00170932	1.6227
TC0200010713.hg.1	ATIC	5-aminoimidazole-4-carboxamide ribonucleotide formyltransferase/IMP cyclohydrolase	ENSG00000138363	471	FALSE	-0.394912	8.51184	-5.03454	5.73119e-05	0.00170984	1.62053
TC2200009351.hg.1	CSNK1E	casein kinase 1 epsilon	ENSG00000213923	1454	FALSE	0.286665	10.2401	5.03332	5.74758e-05	0.00170984	1.61769
TC0400010282.hg.1	SEL1L3	SEL1L family member 3	ENSG00000091490	23231	FALSE	-0.440411	9.16816	-5.03312	5.75039e-05	0.00170984	1.61721
TC0300013736.hg.1	DLG1	discs large MAGUK scaffold protein 1	ENSG00000075711	1739	FALSE	-0.281078	9.58568	-5.02801	5.81965e-05	0.00172744	1.60532
TC0300009301.hg.1	PTX3	pentraxin 3	ENSG00000163661	5806	FALSE	-0.520073	6.28449	-5.02406	5.87365e-05	0.00174045	1.59614
TC1500009709.hg.1	CA12	carbonic anhydrase 12	ENSG00000074410	771	FALSE	-0.390525	7.0247	-5.0181	5.95634e-05	0.0017619	1.58226
TC0X00011413.hg.1	L1CAM	L1 cell adhesion molecule	ENSG00000198910	3897	FALSE	-0.742392	6.44682	-5.01397	6.01416e-05	0.00177395	1.57267
TC0200006569.hg.1	SOX11	SRY-box transcription factor 11	ENSG00000176887	6664	FALSE	0.441663	8.38512	5.01372	6.01779e-05	0.00177395	1.57207
TC0100007295.hg.1	EPHB2	EPH receptor B2	ENSG00000133216	2048	FALSE	-0.413569	9.18821	-5.01085	6.05837e-05	0.00178285	1.5654
TC1200007204.hg.1	TSPAN11	tetraspanin 11	ENSG00000110900	441631	FALSE	0.321207	9.08706	5.00738	6.10789e-05	0.00178965	1.55732
TC0100006675.hg.1	KCNAB2	potassium voltage-gated channel subfamily A regulatory beta subunit 2	ENSG00000069424	8514	FALSE	0.463141	6.09323	5.00727	6.1094e-05	0.00178965	1.55707
TC0900011160.hg.1	EPB41L4B	erythrocyte membrane protein band 4.1 like 4B	ENSG00000095203	54566	FALSE	-0.607132	6.71985	-5.00703	6.11284e-05	0.00178965	1.55651
TC0400012473.hg.1	GPM6A	glycoprotein M6A	ENSG00000150625	2823	FALSE	0.28025	10.8393	5.00344	6.16457e-05	0.00179799	1.54814
TC1500007554.hg.1	ZNF609	zinc finger protein 609	ENSG00000180357	23060	FALSE	0.324547	9.1408	5.00303	6.17049e-05	0.00179799	1.54719
TC0200006648.hg.1	IAH1	isoamyl acetate hydrolyzing esterase 1 (putative)	ENSG00000134330	285148	FALSE	-0.356076	8.51574	-5.00286	6.17282e-05	0.00179799	1.54682
TC0100018398.hg.1	TNFRSF25	TNF receptor superfamily member 25	ENSG00000215788	8718	FALSE	0.411954	6.89912	5.00122	6.19673e-05	0.00180189	1.54298
TC1900006524.hg.1	CIRBP	cold inducible RNA binding protein	ENSG00000099622	1153	FALSE	0.277833	10.0518	4.99343	6.31088e-05	0.00183197	1.52486
TC0700010581.hg.1	HIBADH	3-hydroxyisobutyrate dehydrogenase	ENSG00000106049	11112	FALSE	-0.466855	6.19878	-4.98759	6.39791e-05	0.00185409	1.51126
TC0600011507.hg.1	PSMB8	proteasome 20S subunit beta 8	ENSG00000204264	5696	TRUE	-0.385611	9.08053	-4.98539	6.43109e-05	0.00186056	1.50612
TC0600012839.hg.1	CDK19	cyclin dependent kinase 19	ENSG00000155111	23097	FALSE	0.370219	8.81185	4.98316	6.46482e-05	0.00186717	1.50093
TC1100009434.hg.1	DDX25	DEAD-box helicase 25	ENSG00000109832	29118	FALSE	0.496328	7.08909	4.98069	6.50225e-05	0.00187481	1.4952
TC1200010130.hg.1	SOX5	SRY-box transcription factor 5	ENSG00000134532	6660	FALSE	0.338997	9.33261	4.9774	6.55265e-05	0.00188617	1.48754
TC0600009961.hg.1	ARID1B	AT-rich interaction domain 1B	ENSG00000049618	57492	FALSE	0.313758	8.76211	4.97645	6.56726e-05	0.00188721	1.48532
TC0800007774.hg.1	CHD7	chromodomain helicase DNA binding protein 7	ENSG00000171316	55636	FALSE	0.292409	8.91924	4.9708	6.65505e-05	0.00190923	1.47214
TC0300010975.hg.1	KIF9	kinesin family member 9	ENSG00000088727	64147	FALSE	0.309086	9.10314	4.96648	6.72278e-05	0.00192544	1.46209
TC0200009966.hg.1	METAP1D	methionyl aminopeptidase type 1D, mitochondrial	ENSG00000172878	254042	FALSE	0.542085	7.17532	4.95883	6.84453e-05	0.00195703	1.44428
TC0300013151.hg.1	NCEH1	neutral cholesterol ester hydrolase 1	ENSG00000144959	57552	FALSE	-0.469654	6.60396	-4.94829	7.01618e-05	0.00200277	1.4197
TC1000006782.hg.1	ECHDC3	enoyl-CoA hydratase domain containing 3	ENSG00000134463	79746	FALSE	-0.636267	5.93049	-4.94706	7.03644e-05	0.00200521	1.41684
TC1400010704.hg.1	CRIP1	cysteine rich protein 1	ENSG00000213145	1396	FALSE	-0.553446	6.93186	-4.94488	7.07255e-05	0.00201215	1.41176
TC2200007906.hg.1	BID	BH3 interacting domain death agonist	ENSG00000015475	637	FALSE	-0.325708	8.05312	-4.94211	7.11874e-05	0.00202194	1.4053
TC1100008469.hg.1	SERPINH1	serpin family H member 1	ENSG00000149257	871	FALSE	-0.385787	8.80942	-4.93293	7.27379e-05	0.00206064	1.38392
TC1100010440.hg.1	MPPED2	metallophosphoesterase domain containing 2	ENSG00000066382	744	FALSE	0.30885	9.79866	4.93262	7.27907e-05	0.00206064	1.38319
TC1300008059.hg.1	SOX1	SRY-box transcription factor 1	ENSG00000182968	6656	FALSE	0.351097	8.66138	4.92586	7.39565e-05	0.00209019	1.36743
TC1800008827.hg.1	CCBE1	collagen and calcium binding EGF domains 1	ENSG00000183287	147372	FALSE	0.424453	6.60385	4.90942	7.68707e-05	0.00216897	1.32909
TC0700011876.hg.1	ASNS	asparagine synthetase (glutamine-hydrolyzing)	ENSG00000070669	440	FALSE	-0.679373	7.22439	-4.90757	7.72054e-05	0.00217483	1.32478
TC0600011386.hg.1	IER3	immediate early response 3	ENSG00000137331	8870	TRUE	-0.523881	6.81274	-4.90599	7.74939e-05	0.00217503	1.32108
TC0800009954.hg.1	STMN4	stathmin 4	ENSG00000015592	81551	FALSE	0.503031	6.71396	4.9056	7.75642e-05	0.00217503	1.32018
TC0900012141.hg.1	GCNT1	glucosaminyl (N-acetyl) transferase 1	ENSG00000187210	2650	FALSE	-0.644639	4.95703	-4.90544	7.75933e-05	0.00217503	1.3198
TC0800011683.hg.1	FBXO32	F-box protein 32	ENSG00000156804	114907	FALSE	0.281249	9.55373	4.90214	7.81984e-05	0.00218841	1.3121
TC0200015771.hg.1	TUBA4A	tubulin alpha 4a	ENSG00000127824	7277	FALSE	-0.476761	6.38275	-4.89967	7.86529e-05	0.00219753	1.30635
TC1000009152.hg.1	HTRA1	HtrA serine peptidase 1	ENSG00000166033	5654	FALSE	-0.257388	10.7348	-4.8931	7.98782e-05	0.00222813	1.29101
TC0300012038.hg.1	CCDC191	coiled-coil domain containing 191	ENSG00000163617	57577	FALSE	0.680915	5.85203	4.89181	8.01213e-05	0.00223128	1.288
TC1300009954.hg.1	DNAJC15	DnaJ heat shock protein family (Hsp40) member C15	ENSG00000120675	29103	FALSE	-0.376472	8.4929	-4.89095	8.02834e-05	0.00223216	1.286
TC1100009024.hg.1	LAYN	layilin	ENSG00000204381	143903	FALSE	-0.6728	4.46385	-4.88988	8.0486e-05	0.00223417	1.2835
TC1100010639.hg.1	TP53I11	tumor protein p53 inducible protein 11	ENSG00000175274	9537	FALSE	0.462373	8.77708	4.88496	8.1422e-05	0.0022498	1.27203
TC0600007628.hg.1	C4B	complement C4B (Chido blood group)	ENSG00000224389	721	TRUE	-0.248715	10.1635	-4.88485	8.14429e-05	0.0022498	1.27177
TC0600014108.hg.1	C4A	complement C4A (Rodgers blood group)	ENSG00000244731	720	TRUE	-0.248715	10.1635	-4.88485	8.14429e-05	0.0022498	1.27177
TC0400007455.hg.1	SLC10A4	solute carrier family 10 member 4	ENSG00000145248	201780	FALSE	0.317552	8.13297	4.87749	8.2865e-05	0.00228539	1.2546
TC1500007833.hg.1	PML	PML nuclear body scaffold	ENSG00000140464	5371	FALSE	-0.484138	6.5845	-4.87021	8.42982e-05	0.00232118	1.2376
TC0200011022.hg.1	SP140L	SP140 nuclear body protein like	ENSG00000185404	93349	FALSE	-0.618366	6.11629	-4.86195	8.59534e-05	0.00236296	1.21832
TC0600008981.hg.1	CRYBG1	crystallin beta-gamma domain containing 1	ENSG00000112297	202	FALSE	-0.643856	3.87599	-4.85684	8.69939e-05	0.00238768	1.20638
TC0100013071.hg.1	MFAP2	microfibril associated protein 2	ENSG00000117122	4237	FALSE	-0.383427	8.55477	-4.85581	8.7205e-05	0.00238768	1.20398
TC0400011974.hg.1	MGAT4D	MGAT4 family member D	ENSG00000205301	152586	FALSE	-0.944855	4.39933	-4.85549	8.7271e-05	0.00238768	1.20323
TC0100015180.hg.1	WDR47	WD repeat domain 47	ENSG00000085433	22911	FALSE	0.43951	8.60221	4.85266	8.78525e-05	0.00239976	1.19665
TC1900009792.hg.1	PODNL1	podocan like 1	ENSG00000132000	79883	TRUE	-0.422332	7.18927	-4.84965	8.84793e-05	0.00241303	1.1896
TC2000009357.hg.1	PREX1	phosphatidylinositol-3,4,5-trisphosphate dependent Rac exchange factor 1	ENSG00000124126	57580	FALSE	0.280981	10.2497	4.84732	8.89648e-05	0.00242242	1.18417
TC1100011014.hg.1	SLC15A3	solute carrier family 15 member 3	ENSG00000110446	51296	FALSE	-0.498522	6.33988	-4.84607	8.9227e-05	0.0024257	1.18125
TC0100011245.hg.1	ADORA1	adenosine A1 receptor	ENSG00000163485	134	FALSE	-0.410124	9.89146	-4.84367	8.9733e-05	0.00243559	1.17565
TC0900008178.hg.1	NANS	N-acetylneuraminate synthase	ENSG00000095380	54187	FALSE	-0.335678	8.33212	-4.84297	8.98814e-05	0.00243576	1.17401
TC1500009830.hg.1	LCTL	lactase like	ENSG00000188501	197021	FALSE	-0.361291	7.26695	-4.84135	9.02245e-05	0.00243633	1.17023
TC1500009641.hg.1	RORA	RAR related orphan receptor A	ENSG00000069667	6095	FALSE	0.598404	6.49389	4.84126	9.02438e-05	0.00243633	1.17002
TC0700008747.hg.1	HBP1	HMG-box transcription factor 1	ENSG00000105856	26959	TRUE	0.357306	8.42685	4.84086	9.03292e-05	0.00243633	1.16908
TC1200012722.hg.1	ZNF664-RFLNA	ZNF664-RFLNA readthrough	ENSG00000178882	100533183	FALSE	0.37578	5.79295	4.83804	9.09318e-05	0.00244122	1.16249
TC0800008235.hg.1	CIBAR1	CBY1 interacting BAR domain containing 1	ENSG00000188343	137392	FALSE	-0.387329	8.39165	-4.83774	9.09961e-05	0.00244122	1.16179
TC0900012126.hg.1	ANKRD20A3P	ankyrin repeat domain 20 family member A3, pseudogene		441425	TRUE	0.505652	6.57659	4.83771	9.10015e-05	0.00244122	1.16173
TC0800010081.hg.1	RNF122	ring finger protein 122	ENSG00000133874	79845	FALSE	0.430669	7.35646	4.83734	9.10807e-05	0.00244122	1.16087
TC0300010891.hg.1	ZNF852	zinc finger protein 852	ENSG00000178917	285346	TRUE	0.453742	6.68232	4.83654	9.12531e-05	0.00244202	1.15899
TC0700013102.hg.1	KMT2C	lysine methyltransferase 2C	ENSG00000055609	58508	FALSE	0.254758	8.8246	4.83345	9.19195e-05	0.00245601	1.15178
TC1200012424.hg.1	TMEM132D	transmembrane protein 132D	ENSG00000151952	121256	FALSE	-0.709596	5.81122	-4.83224	9.21827e-05	0.00245921	1.14894
TC0600008655.hg.1	TPBG	trophoblast glycoprotein	ENSG00000146242	7162	TRUE	-0.531223	6.31605	-4.83129	9.23893e-05	0.00246077	1.14672
TC2100008555.hg.1	TIAM1	TIAM Rac1 associated GEF 1	ENSG00000156299	7074	FALSE	0.53795	7.31094	4.83058	9.2543e-05	0.00246077	1.14508
TC1500009238.hg.1	FRMD5	FERM domain containing 5	ENSG00000171877	84978	FALSE	-0.292783	9.11458	-4.82999	9.26721e-05	0.00246077	1.14369
TC0100017693.hg.1	PGBD5	piggyBac transposable element derived 5	ENSG00000177614	79605	FALSE	0.544135	6.91208	4.82204	9.44255e-05	0.00250345	1.12511
TC0800009143.hg.1	ADGRB1	adhesion G protein-coupled receptor B1	ENSG00000181790	575	FALSE	0.485717	7.41291	4.82016	9.48427e-05	0.00251062	1.12074
TC0500009673.hg.1	ZNF454	zinc finger protein 454	ENSG00000178187	285676	FALSE	0.368893	7.34492	4.81327	9.63957e-05	0.00254779	1.10465
TC0900010773.hg.1	ROR2	receptor tyrosine kinase like orphan receptor 2	ENSG00000169071	4920	FALSE	0.513035	6.3257	4.80861	9.74611e-05	0.00257198	1.09375
TC0500011725.hg.1	MCC	MCC regulator of WNT signaling pathway	ENSG00000171444	4163	FALSE	-0.299673	7.63469	-4.79881	9.97404e-05	0.00262808	1.07084
TC2000008445.hg.1	FLRT3	fibronectin leucine rich transmembrane protein 3	ENSG00000125848	23767	FALSE	-0.322926	8.57267	-4.79443	0.000100775	0.00265127	1.06061
TC1000007861.hg.1	TET1	tet methylcytosine dioxygenase 1	ENSG00000138336	80312	FALSE	0.474015	8.33718	4.79249	0.000101236	0.00265931	1.05609
TC1200010490.hg.1	NELL2	neural EGFL like 2	ENSG00000184613	4753	FALSE	-0.573772	5.17693	-4.79037	0.000101744	0.00266855	1.05113
TC0X00006799.hg.1	SAT1	spermidine/spermine N1-acetyltransferase 1	ENSG00000130066	6303	FALSE	-0.26516	9.06015	-4.78919	0.000102028	0.00267191	1.04837
TC2000006642.hg.1	BMP2	bone morphogenetic protein 2	ENSG00000125845	650	FALSE	-0.460044	6.77272	-4.78556	0.000102906	0.0026908	1.03987
TC1000010722.hg.1	SLC16A9	solute carrier family 16 member 9	ENSG00000165449	220963	FALSE	0.321466	9.15115	4.7832	0.000103481	0.0027017	1.03436
TC0500011502.hg.1	ELL2	elongation factor for RNA polymerase II 2	ENSG00000118985	22936	FALSE	-0.570498	7.15456	-4.77688	0.000105034	0.00273807	1.0196
TC2000009604.hg.1	PMEPA1	prostate transmembrane protein, androgen induced 1	ENSG00000124225	56937	FALSE	-0.410569	9.38067	-4.77355	0.000105863	0.00275549	1.01181
TC0700007996.hg.1	ELN	elastin	ENSG00000049540	2006	FALSE	-0.478707	7.29482	-4.76926	0.000106939	0.00277827	1.00179
TC1100010054.hg.1	NRIP3	nuclear receptor interacting protein 3	ENSG00000175352	56675	FALSE	-0.710448	4.44989	-4.76877	0.000107062	0.00277827	1.00064
TC2200009345.hg.1	C1QTNF6	C1q and TNF related 6	ENSG00000133466	114904	FALSE	-0.319191	7.61043	-4.7662	0.000107714	0.00279096	0.994629
TC0300012255.hg.1	OSBPL11	oxysterol binding protein like 11	ENSG00000144909	114885	FALSE	0.448971	7.62077	4.76399	0.000108279	0.00280134	0.989453
TC0100015925.hg.1	KCNN3	potassium calcium-activated channel subfamily N member 3	ENSG00000143603	3782	FALSE	0.354342	9.50722	4.75697	0.000110088	0.00284386	0.973036
TC0800010275.hg.1	PLAT	plasminogen activator, tissue type	ENSG00000104368	5327	FALSE	-0.429168	6.62761	-4.74973	0.000111986	0.00288852	0.956107
TC0400006718.hg.1	SORCS2	sortilin related VPS10 domain containing receptor 2	ENSG00000184985	57537	FALSE	0.421229	7.60977	4.74398	0.000113515	0.00292357	0.94267
TC1300009980.hg.1	LMO7	LIM domain 7	ENSG00000136153	4008	FALSE	-0.551452	5.76186	-4.72919	0.000117551	0.00302296	0.90807
TC0600006976.hg.1	PHACTR1	phosphatase and actin regulator 1	ENSG00000112137	221692	FALSE	0.705487	5.49999	4.72543	0.000118598	0.00304532	0.899286
TC0800007316.hg.1	EIF4EBP1	eukaryotic translation initiation factor 4E binding protein 1	ENSG00000187840	1978	FALSE	-0.573426	7.0461	-4.72344	0.000119158	0.00305511	0.894626
TC2200006540.hg.1	USP18	ubiquitin specific peptidase 18	ENSG00000184979	11274	FALSE	-0.534013	6.66059	-4.7193	0.000120329	0.00308053	0.884938
TC1700007942.hg.1	NBR1	NBR1 autophagy cargo receptor	ENSG00000188554	4077	FALSE	0.362842	7.16122	4.71661	0.000121094	0.00309549	0.878663
TC1100012966.hg.1	MICAL2	microtubule associated monooxygenase, calponin and LIM domain containing 2	ENSG00000133816	9645	FALSE	-0.430266	7.06144	-4.71448	0.000121706	0.0031065	0.873671
TC0X00008017.hg.1	PLP1	proteolipid protein 1	ENSG00000123560	5354	FALSE	-0.501064	7.66185	-4.71288	0.000122168	0.00311364	0.869923
TC1700011261.hg.1	SEPTIN4	septin 4	ENSG00000108387	5414	FALSE	-0.387868	7.6323	-4.7092	0.000123234	0.00313515	0.861314
TC1200008650.hg.1	ASCL1	achaete-scute family bHLH transcription factor 1	ENSG00000139352	429	FALSE	0.560362	8.31351	4.70871	0.000123378	0.00313515	0.860164
TC0300013950.hg.1	EFHB	EF-hand domain family member B	ENSG00000163576	151651	FALSE	0.575106	4.77371	4.70448	0.000124616	0.00316191	0.850279
TC0X00011194.hg.1	FLNA	filamin A	ENSG00000196924	2316	FALSE	-0.232753	10.6042	-4.70175	0.000125422	0.00317416	0.843894
TC0800010084.hg.1	DUSP26	dual specificity phosphatase 26	ENSG00000133878	78986	FALSE	0.407705	6.74461	4.70159	0.000125469	0.00317416	0.843522
TC0300007077.hg.1	ACVR2B	activin A receptor type 2B	ENSG00000114739	93	FALSE	0.524928	7.02204	4.69748	0.000126694	0.00320044	0.8339
TC0200007200.hg.1	LTBP1	latent transforming growth factor beta binding protein 1	ENSG00000049323	4052	FALSE	-0.240588	10.1553	-4.69141	0.000128527	0.00324194	0.819685
TC1200012561.hg.1	ZNF891	zinc finger protein 891	ENSG00000214029	101060200	FALSE	0.639841	5.54344	4.68924	0.000129186	0.00325378	0.81462
TC0600011805.hg.1	USP49	ubiquitin specific peptidase 49	ENSG00000164663	25862	FALSE	0.664925	5.91171	4.68807	0.000129544	0.003258	0.811882
TC0100015186.hg.1	CFAP276	cilia and flagella associated protein 276	ENSG00000179902	127003	FALSE	0.407725	6.1863	4.68199	0.000131422	0.00330038	0.797636
TC0X00008555.hg.1	ZIC3	Zic family member 3	ENSG00000156925	7547	FALSE	0.71327	5.93321	4.68057	0.000131861	0.00330658	0.79433
TC1000008396.hg.1	IFIT2	interferon induced protein with tetratricopeptide repeats 2	ENSG00000119922	3433	FALSE	-0.518907	6.53097	-4.67995	0.000132057	0.00330664	0.792863
TC0400010205.hg.1	KCNIP4	potassium voltage-gated channel interacting protein 4	ENSG00000185774	80333	TRUE	-0.65238	6.41054	-4.67788	0.000132703	0.00331796	0.788034
TC1400007495.hg.1	PLEKHH1	pleckstrin homology, MyTH4 and FERM domain containing H1	ENSG00000054690	57475	FALSE	0.40705	7.53035	4.67666	0.000133086	0.00332269	0.785181
TC2000008721.hg.1	APMAP	adipocyte plasma membrane associated protein	ENSG00000101474	57136	FALSE	0.295744	8.92787	4.67561	0.000133418	0.00332612	0.782717
TC0200006799.hg.1	MYCN	MYCN proto-oncogene, bHLH transcription factor	ENSG00000134323	4613	FALSE	0.479414	7.33517	4.67218	0.000134504	0.00334832	0.774694
TC1400006663.hg.1	LRP10	LDL receptor related protein 10	ENSG00000197324	26020	FALSE	-0.35609	8.70371	-4.67025	0.000135121	0.00335805	0.770162
TC0100013632.hg.1	FNDC5	fibronectin type III domain containing 5	ENSG00000160097	252995	FALSE	0.411454	7.96042	4.66973	0.000135287	0.00335805	0.768949
TC0600007158.hg.1	SOX4	SRY-box transcription factor 4	ENSG00000124766	6659	FALSE	0.434535	9.61264	4.66221	0.000137712	0.00341332	0.75136
TC0900007129.hg.1	MELK	maternal embryonic leucine zipper kinase	ENSG00000165304	9833	FALSE	-0.295121	7.58662	-4.66118	0.000138049	0.00341672	0.748943
TC1000011445.hg.1	MYOF	myoferlin	ENSG00000138119	26509	FALSE	-0.494805	7.33667	-4.65735	0.000139306	0.00343913	0.739973
TC0300011815.hg.1	DCBLD2	discoidin, CUB and LCCL domain containing 2	ENSG00000057019	131566	FALSE	-0.337585	9.82026	-4.6572	0.000139356	0.00343913	0.739617
TC0800009793.hg.1	SLC18A1	solute carrier family 18 member A1	ENSG00000036565	6570	FALSE	0.54986	4.9026	4.6526	0.000140881	0.00347176	0.728849
TC2000006861.hg.1	RIN2	Ras and Rab interactor 2	ENSG00000132669	54453	FALSE	0.291382	8.64625	4.64631	0.000142993	0.00351874	0.714126
TC0100007838.hg.1	DNALI1	dynein axonemal light intermediate chain 1	ENSG00000163879	7802	FALSE	0.32342	9.69216	4.64548	0.000143273	0.00352056	0.712193
TC1700010865.hg.1	PLCD3	phospholipase C delta 3	ENSG00000161714	113026	FALSE	-0.318279	8.20105	-4.63644	0.000146371	0.00359154	0.691026
TC1500007645.hg.1	MAP2K5	mitogen-activated protein kinase kinase 5	ENSG00000137764	5607	FALSE	-0.234063	9.05149	-4.62708	0.000149649	0.00366673	0.669113
TC1500008135.hg.1	UBE2Q2L	ubiquitin conjugating enzyme E2 Q2 like	ENSG00000259511	100505679	FALSE	0.333339	7.57765	4.62559	0.000150178	0.00367442	0.665627
TC2200007419.hg.1	TNRC6B	trinucleotide repeat containing adaptor 6B	ENSG00000100354	23112	FALSE	0.257323	8.93244	4.61855	0.000152702	0.00373086	0.649137
TC0300012449.hg.1	CPNE4	copine 4	ENSG00000196353	131034	FALSE	0.560158	6.12975	4.6102	0.00015575	0.00379989	0.629592
TC1900009603.hg.1	OLFM2	olfactomedin 2	ENSG00000105088	93145	FALSE	0.365597	7.7383	4.60793	0.00015659	0.00381495	0.624273
TC0X00008027.hg.1	ZCCHC18	zinc finger CCHC-type containing 18	ENSG00000166707	644353	FALSE	0.528501	7.04275	4.60534	0.000157556	0.00383303	0.618191
TC0800007995.hg.1	CRISPLD1	cysteine rich secretory protein LCCL domain containing 1	ENSG00000121005	83690	FALSE	0.340054	9.11827	4.60357	0.000158215	0.00384361	0.614061
TC0600010960.hg.1	TPMT	thiopurine S-methyltransferase	ENSG00000137364	7172	FALSE	-0.395251	6.90975	-4.59937	0.000159797	0.0038707	0.604224
TC1400007328.hg.1	DAAM1	dishevelled associated activator of morphogenesis 1	ENSG00000100592	23002	FALSE	0.273099	9.64918	4.59887	0.000159987	0.0038707	0.603045
TC1700008867.hg.1	SLC9A3R1	SLC9A3 regulator 1	ENSG00000109062	9368	TRUE	-0.320808	8.36028	-4.59881	0.000160008	0.0038707	0.602918
TC0600007480.hg.1	HLA-F	major histocompatibility complex, class I, F	ENSG00000204642	3134	TRUE	-0.344886	7.98955	-4.59789	0.000160359	0.00387373	0.600748
TC0200012140.hg.1	ALK	ALK receptor tyrosine kinase	ENSG00000171094	238	FALSE	-0.296615	9.10603	-4.59649	0.000160891	0.00388109	0.597476
TC0300008242.hg.1	ALCAM	activated leukocyte cell adhesion molecule	ENSG00000170017	214	FALSE	-0.401399	7.73148	-4.59452	0.000161642	0.00389143	0.59287
TC1900007436.hg.1	GATAD2A	GATA zinc finger domain containing 2A	ENSG00000167491	54815	TRUE	-0.333735	9.33447	-4.59378	0.000161928	0.00389143	0.591121
TC0500013374.hg.1	APBB3	amyloid beta precursor protein binding family B member 3	ENSG00000113108	10307	TRUE	0.57915	6.11637	4.5932	0.000162148	0.00389143	0.58978
TC0700010637.hg.1	NOD1	nucleotide binding oligomerization domain containing 1	ENSG00000106100	10392	FALSE	-0.478543	6.23204	-4.59263	0.000162369	0.00389143	0.588432
TC2100007072.hg.1	TTC3	tetratricopeptide repeat domain 3	ENSG00000182670	7267	FALSE	0.21936	10.9338	4.5924	0.000162455	0.00389143	0.587907
TC0400009258.hg.1	PALLD	palladin, cytoskeletal associated protein	ENSG00000129116	23022	FALSE	-0.246544	11.202	-4.59069	0.000163116	0.0039018	0.583894
TC0800009289.hg.1	ZNF517	zinc finger protein 517	ENSG00000197363	340385	FALSE	0.507856	6.29278	4.58658	0.00016471	0.00393443	0.574278
TC0300013859.hg.1	CD200	CD200 molecule	ENSG00000091972	4345	FALSE	0.447754	8.32735	4.58322	0.000166028	0.00396039	0.566398
TC0900012155.hg.1	MSANTD3-TMEFF1	MSANTD3-TMEFF1 readthrough	ENSG00000251349	100526694	FALSE	0.494908	7.73367	4.57874	0.000167799	0.00399708	0.555905
TC0X00010375.hg.1	ZMAT1	zinc finger matrin-type 1	ENSG00000166432	84460	FALSE	0.494235	8.58313	4.57261	0.000170253	0.00403958	0.541552
TC0600008509.hg.1	KCNQ5	potassium voltage-gated channel subfamily Q member 5	ENSG00000185760	56479	FALSE	-0.329029	8.0351	-4.57252	0.00017029	0.00403958	0.541338
TC0200011898.hg.1	SDC1	syndecan 1	ENSG00000115884	6382	FALSE	-0.457676	6.86594	-4.57252	0.000170291	0.00403958	0.541333
TC0300012498.hg.1	ANAPC13	anaphase promoting complex subunit 13	ENSG00000129055	25847	FALSE	-0.244785	8.78396	-4.57141	0.000170738	0.00404457	0.538743
TC0500008871.hg.1	PCDHA9	protocadherin alpha 9	ENSG00000204961	9752	TRUE	0.305274	8.85844	4.56837	0.000171975	0.00406535	0.531606
TC1000010622.hg.1	SGMS1	sphingomyelin synthase 1	ENSG00000198964	259230	FALSE	-0.518655	7.22562	-4.56808	0.00017209	0.00406535	0.530946
TC0600012597.hg.1	EPHA7	EPH receptor A7	ENSG00000135333	2045	FALSE	0.42432	6.73319	4.56654	0.000172721	0.00407464	0.527329
TC0100010518.hg.1	DCAF6	DDB1 and CUL4 associated factor 6	ENSG00000143164	55827	FALSE	-0.393662	7.5033	-4.56571	0.000173059	0.00407701	0.525392
TC1200011812.hg.1	CRY1	cryptochrome circadian regulator 1	ENSG00000008405	1407	FALSE	-0.383027	7.46157	-4.56464	0.000173501	0.0040818	0.522873
TC1000010071.hg.1	ENKUR	enkurin, TRPC channel interacting protein	ENSG00000151023	219670	FALSE	0.542555	6.71892	4.55844	0.000176067	0.0041329	0.508363
TC1200012835.hg.1	NT5DC3	5'-nucleotidase domain containing 3	ENSG00000111696	51559	FALSE	-0.622562	7.44502	-4.5579	0.000176292	0.0041329	0.5071
TC0100016678.hg.1	NIBAN1	niban apoptosis regulator 1	ENSG00000135842	116496	FALSE	-0.463105	7.63288	-4.55708	0.000176635	0.0041329	0.505179
TC0X00007378.hg.1	MAGEH1	MAGE family member H1	ENSG00000187601	28986	FALSE	0.346599	7.61585	4.55707	0.000176638	0.0041329	0.505159
TC0300011448.hg.1	EOGT	EGF domain specific O-linked N-acetylglucosamine transferase	ENSG00000163378	285203	FALSE	-0.76649	5.74109	-4.55066	0.000179344	0.00419048	0.490136
TC1600011527.hg.1	VKORC1	vitamin K epoxide reductase complex subunit 1	ENSG00000167397	79001	FALSE	-0.234312	10.5908	-4.54803	0.000180465	0.00421093	0.483976
TC0900006886.hg.1	TEK	TEK receptor tyrosine kinase	ENSG00000120156	7010	FALSE	-0.636145	5.95356	-4.54433	0.000182057	0.0042423	0.475297
TC1000007833.hg.1	LRRTM3	leucine rich repeat transmembrane neuronal 3	ENSG00000198739	347731	FALSE	0.405138	8.76485	4.53821	0.000184716	0.00429841	0.460968
TC0100014947.hg.1	TMED5	transmembrane p24 trafficking protein 5	ENSG00000117500	50999	FALSE	-0.418981	7.26552	-4.5355	0.000185908	0.00432027	0.454613
TC0900010968.hg.1	TRIM14	tripartite motif containing 14	ENSG00000106785	9830	FALSE	-0.534549	7.36981	-4.52936	0.000188633	0.00437767	0.440233
TC0700009977.hg.1	PDGFA	platelet derived growth factor subunit A	ENSG00000197461	5154	FALSE	-0.387884	6.97513	-4.52775	0.000189354	0.00438846	0.436462
TC0600009606.hg.1	ARFGEF3	ARFGEF family member 3	ENSG00000112379	57221	FALSE	0.567819	5.64724	4.52646	0.000189934	0.00439594	0.433442
TC0100017834.hg.1	GNG4	G protein subunit gamma 4	ENSG00000168243	2786	TRUE	0.395579	8.15985	4.52256	0.000191696	0.00443074	0.424318
TC0300007610.hg.1	PXK	PX domain containing serine/threonine kinase like	ENSG00000168297	54899	FALSE	-0.289972	8.18145	-4.5216	0.000192137	0.00443496	0.422046
TC0700012761.hg.1	ZC3HAV1	zinc finger CCCH-type containing, antiviral 1	ENSG00000105939	56829	FALSE	-0.460909	7.18548	-4.52096	0.000192427	0.00443566	0.420559
TC0900007807.hg.1	DAPK1	death associated protein kinase 1	ENSG00000196730	1612	FALSE	0.324908	9.38999	4.51664	0.000194407	0.00447492	0.410442
TC0300014032.hg.1	POPDC2	popeye domain containing 2	ENSG00000121577	64091	FALSE	0.456666	5.96227	4.51611	0.000194652	0.00447492	0.409198
TC1300009979.hg.1	UCHL3	ubiquitin C-terminal hydrolase L3	ENSG00000118939	7347	FALSE	-0.302053	8.15166	-4.51298	0.000196101	0.00450218	0.401873
TC1900009134.hg.1	SBNO2	strawberry notch homolog 2	ENSG00000064932	22904	TRUE	-0.338136	6.80233	-4.51193	0.000196593	0.00450742	0.399399
TC1300009088.hg.1	DIAPH3	diaphanous related formin 3	ENSG00000139734	81624	FALSE	-0.447355	6.74416	-4.50997	0.00019751	0.0045224	0.394801
TC1400008619.hg.1	ZNF219	zinc finger protein 219	ENSG00000165804	51222	FALSE	0.361205	7.45917	4.50863	0.000198135	0.00452662	0.39168
TC1200009800.hg.1	SLC2A3	solute carrier family 2 member 3	ENSG00000059804	6515	FALSE	-0.636398	6.02086	-4.50845	0.000198223	0.00452662	0.391242
TC1900010693.hg.1	TTC9B	tetratricopeptide repeat domain 9B	ENSG00000174521	148014	FALSE	0.790983	5.61301	4.50526	0.000199728	0.00455491	0.383772
TC1100011658.hg.1	MAP6	microtubule associated protein 6	ENSG00000171533	4135	FALSE	0.220951	10.5442	4.50423	0.000200215	0.00455994	0.381367
TC0100009900.hg.1	CIART	circadian associated repressor of transcription	ENSG00000159208	148523	FALSE	0.322841	7.93065	4.50034	0.000202069	0.00459607	0.372259
TC0600013740.hg.1	RSPH3	radial spoke head 3	ENSG00000130363	83861	FALSE	0.389081	6.73404	4.49807	0.00020316	0.00461474	0.366944
TC0400011650.hg.1	ARSJ	arylsulfatase family member J	ENSG00000180801	79642	FALSE	-0.316193	7.43902	-4.49305	0.000205598	0.00466394	0.355162
TC0X00008230.hg.1	IL13RA1	interleukin 13 receptor subunit alpha 1	ENSG00000131724	3597	FALSE	-0.713587	6.35705	-4.4907	0.000206743	0.00468372	0.349675
TC0400012810.hg.1	MOB1B	MOB kinase activator 1B	ENSG00000173542	92597	FALSE	0.363245	8.51495	4.48702	0.000208559	0.00471862	0.341038
TC2200007214.hg.1	APOL6	apolipoprotein L6	ENSG00000221963	80830	FALSE	-0.592529	5.13493	-4.48366	0.000210225	0.00474893	0.333182
TC2000009948.hg.1	NPEPL1	aminopeptidase like 1	ENSG00000215440	79716	FALSE	0.31533	6.57802	4.48321	0.000210453	0.00474893	0.33211
TC1000012561.hg.1	JMJD1C	jumonji domain containing 1C	ENSG00000171988	221037	FALSE	0.21792	10.2152	4.48175	0.000211182	0.00475842	0.328698
TC0300006465.hg.1	LRRN1	leucine rich repeat neuronal 1	ENSG00000175928	57633	FALSE	0.261829	9.64104	4.48126	0.00021143	0.00475842	0.327539
TC1900006477.hg.1	FSTL3	follistatin like 3	ENSG00000070404	10272	FALSE	-0.367339	6.69778	-4.47807	0.000213034	0.00478823	0.320077
TC0900012158.hg.1	PALM2AKAP2	PALM2 and AKAP2 fusion	ENSG00000157654	445815	FALSE	-0.570445	5.44343	-4.4769	0.000213626	0.00479525	0.317334
TC1700011131.hg.1	MBTD1	mbt domain containing 1	ENSG00000011258	54799	FALSE	0.376241	8.4017	4.46929	0.000217516	0.00487618	0.299517
TC1500010899.hg.1	ST20-MTHFS	ST20-MTHFS readthrough	ENSG00000259332	100528021	FALSE	-0.251733	8.01304	-4.46717	0.000218615	0.00489441	0.29454
TC1900009517.hg.1	FBN3	fibrillin 3	ENSG00000142449	84467	FALSE	0.690237	6.10546	4.46366	0.000220442	0.00492886	0.286327
TC2000007283.hg.1	SRC	SRC proto-oncogene, non-receptor tyrosine kinase	ENSG00000197122	6714	FALSE	0.437643	7.90347	4.45819	0.000223324	0.00498679	0.273504
TC1700009333.hg.1	NXN	nucleoredoxin	ENSG00000167693	64359	TRUE	0.370097	8.09503	4.45595	0.000224516	0.00500688	0.268248
TC1700008102.hg.1	LRRC37A2	leucine rich repeat containing 37 member A2	ENSG00000238083	474170	TRUE	0.288037	8.02144	4.45295	0.000226122	0.00503218	0.261214
TC0X00007191.hg.1	EBP	EBP cholestenol delta-isomerase	ENSG00000147155	10682	FALSE	-0.250844	9.28555	-4.45273	0.000226238	0.00503218	0.260707
TC0700011603.hg.1	MAGI2	membrane associated guanylate kinase, WW and PDZ domain containing 2	ENSG00000187391	9863	FALSE	0.268894	9.2302	4.44483	0.000230518	0.00512072	0.24221
TC0X00010525.hg.1	TRPC5	transient receptor potential cation channel subfamily C member 5	ENSG00000072315	7224	FALSE	0.771961	4.89469	4.44138	0.000232415	0.00515618	0.23412
TC0700006445.hg.1	FAM20C	FAM20C golgi associated secretory pathway kinase	ENSG00000177706	56975	TRUE	-0.464608	7.05158	-4.43957	0.000233414	0.00517165	0.229885
TC1900011807.hg.1	ZNF583	zinc finger protein 583	ENSG00000198440	147949	FALSE	0.333664	7.0731	4.43877	0.000233858	0.00517479	0.22801
TC0600010111.hg.1	PACRG	parkin coregulated	ENSG00000112530	135138	FALSE	0.558687	6.38687	4.43803	0.000234271	0.00517723	0.226271
TC0100018511.hg.1	MIR9-1HG	MIR9-1 host gene	ENSG00000125462	10485	FALSE	0.244566	11.0565	4.43563	0.000235612	0.00520016	0.220637
TC2200008620.hg.1	IFT27	intraflagellar transport 27	ENSG00000100360	11020	FALSE	0.298405	8.47455	4.42948	0.000239073	0.00526769	0.206246
TC1600010798.hg.1	ZNF821	zinc finger protein 821	ENSG00000102984	55565	FALSE	0.541928	6.46761	4.42911	0.000239287	0.00526769	0.205365
TC0100013267.hg.1	LUZP1	leucine zipper protein 1	ENSG00000169641	7798	FALSE	-0.336221	8.65952	-4.42478	0.000241755	0.00530878	0.19524
TC1800007071.hg.1	ZNF397	zinc finger protein 397	ENSG00000186812	84307	FALSE	0.377768	8.09225	4.42443	0.000241961	0.00530878	0.194399
TC0900012179.hg.1	SPTAN1	spectrin alpha, non-erythrocytic 1	ENSG00000197694	6709	FALSE	0.215881	10.1418	4.42421	0.000242083	0.00530878	0.1939
TC2100007263.hg.1	PDE9A	phosphodiesterase 9A	ENSG00000160191	5152	FALSE	0.328039	8.60283	4.42284	0.000242876	0.00531935	0.190674
TC0800009374.hg.1	CSMD1	CUB and Sushi multiple domains 1	ENSG00000183117	64478	FALSE	0.29439	8.0252	4.4187	0.000245272	0.00536496	0.18099
TC1100013174.hg.1	BSCL2	BSCL2 lipid droplet biogenesis associated, seipin	ENSG00000168000	26580	FALSE	-0.263026	9.19718	-4.41816	0.000245589	0.00536506	0.179713
TC0100006773.hg.1	SPSB1	splA/ryanodine receptor domain and SOCS box containing 1	ENSG00000171621	80176	FALSE	-0.606424	5.51531	-4.41757	0.000245934	0.00536574	0.178329
TC2100007082.hg.1	DYRK1A	dual specificity tyrosine phosphorylation regulated kinase 1A	ENSG00000157540	1859	FALSE	0.257043	9.17334	4.41186	0.00024929	0.00543205	0.164957
TC1700011128.hg.1	SPAG9	sperm associated antigen 9	ENSG00000008294	9043	FALSE	0.324487	10.3378	4.4102	0.000250271	0.00544649	0.161083
TC2100008491.hg.1	GRIK1-AS2	GRIK1 antisense RNA 2	ENSG00000156273	100379661	FALSE	0.680316	5.71181	4.40895	0.000251017	0.00545579	0.158146
TC0800007976.hg.1	TMEM70	transmembrane protein 70	ENSG00000175606	54968	FALSE	-0.322064	8.11835	-4.40622	0.000252649	0.0054843	0.151755
TC1000007871.hg.1	STOX1	storkhead box 1	ENSG00000165730	219736	FALSE	-0.35757	7.22352	-4.40213	0.000255113	0.00553079	0.142178
TC1700012354.hg.1	VAMP2	vesicle associated membrane protein 2	ENSG00000220205	6844	FALSE	0.305301	9.0112	4.40099	0.000255804	0.00553876	0.139511
TC0700010907.hg.1	PGAM2	phosphoglycerate mutase 2	ENSG00000164708	5224	FALSE	0.327756	7.61082	4.39386	0.000260175	0.00562628	0.1228
TC0100017029.hg.1	PIK3C2B	phosphatidylinositol-4-phosphate 3-kinase catalytic subunit type 2 beta	ENSG00000133056	5287	FALSE	0.404367	6.66399	4.3867	0.000264636	0.00571554	0.106031
TC1200010050.hg.1	LMO3	LIM domain only 3	ENSG00000048540	55885	FALSE	0.442341	7.03036	4.38365	0.000266564	0.00574992	0.0988755
TC0500013322.hg.1	NAIP	NLR family apoptosis inhibitory protein	ENSG00000249437	4671	TRUE	0.402548	6.88391	4.38232	0.000267403	0.00576076	0.0957758
TC1700008920.hg.1	ITGB4	integrin subunit beta 4	ENSG00000132470	3691	FALSE	-0.284215	7.30013	-4.38178	0.000267747	0.00576093	0.0945083
TC1300007774.hg.1	MBNL2	muscleblind like splicing regulator 2	ENSG00000139793	10150	FALSE	-0.240428	9.08065	-4.37902	0.00026951	0.00577588	0.0880346
TC0200012643.hg.1	CCDC88A	coiled-coil domain containing 88A	ENSG00000115355	55704	FALSE	0.432677	10.3638	4.37896	0.000269549	0.00577588	0.0878942
TC1500010501.hg.1	RGMA	repulsive guidance molecule BMP co-receptor a	ENSG00000182175	56963	FALSE	0.282414	9.38955	4.37868	0.000269727	0.00577588	0.0872422
TC0100010218.hg.1	KIRREL1	kirre like nephrin family adhesion molecule 1	ENSG00000183853	55243	FALSE	-0.277973	8.75094	-4.37858	0.00026979	0.00577588	0.0870097
TC1000008585.hg.1	MARVELD1	MARVEL domain containing 1	ENSG00000155254	83742	FALSE	-0.680524	5.84141	-4.37783	0.000270274	0.005779	0.0852453
TC1100012735.hg.1	SRPRA	SRP receptor subunit alpha	ENSG00000182934	6734	FALSE	-0.220803	9.11494	-4.37689	0.000270876	0.00578466	0.0830487
TC1200011770.hg.1	ALDH1L2	aldehyde dehydrogenase 1 family member L2	ENSG00000136010	160428	FALSE	-0.827077	5.30924	-4.37607	0.000271403	0.00578869	0.0811339
TC1200007992.hg.1	SRGAP1	SLIT-ROBO Rho GTPase activating protein 1	ENSG00000196935	57522	FALSE	0.371568	8.74992	4.3739	0.000272805	0.00580723	0.0760523
TC0200015869.hg.1	AP1S3	adaptor related protein complex 1 subunit sigma 3	ENSG00000152056	130340	FALSE	-1.13858	4.32722	-4.37368	0.000272951	0.00580723	0.0755274
TC1100013221.hg.1	CASP1	caspase 1	ENSG00000137752	834	FALSE	-0.563147	5.40382	-4.37309	0.000273333	0.00580816	0.0741461
TC0800011334.hg.1	KLF10	Kruppel like factor 10	ENSG00000155090	7071	FALSE	-0.310188	7.73792	-4.37255	0.000273686	0.00580846	0.0728724
TC0200009967.hg.1	DLX1	distal-less homeobox 1	ENSG00000144355	1745	FALSE	0.238329	10.7431	4.36795	0.000276693	0.00586501	0.0620989
TC1800006757.hg.1	LDLRAD4	low density lipoprotein receptor class A domain containing 4	ENSG00000168675	753	FALSE	-0.408395	9.03351	-4.36712	0.000277237	0.00586928	0.0601622
TC0700010857.hg.1	GLI3	GLI family zinc finger 3	ENSG00000106571	2737	FALSE	-0.280023	8.94032	-4.36548	0.000278321	0.00588494	0.0563168
TC0700013382.hg.1	KCTD7	potassium channel tetramerization domain containing 7	ENSG00000243335	154881	FALSE	0.336808	6.90345	4.36256	0.000280259	0.00591862	0.0494748
TC0100017066.hg.1	KLHDC8A	kelch domain containing 8A	ENSG00000162873	55220	FALSE	0.229875	10.0156	4.36203	0.000280608	0.00591869	0.0482483
TC0300013949.hg.1	SATB1	SATB homeobox 1	ENSG00000182568	6304	FALSE	0.435795	8.25058	4.35894	0.000282675	0.00594809	0.0410136
TC0300006993.hg.1	CRTAP	cartilage associated protein	ENSG00000170275	10491	FALSE	-0.364796	9.35076	-4.35891	0.000282697	0.00594809	0.0409382
TC1000007564.hg.1	MAPK8	mitogen-activated protein kinase 8	ENSG00000107643	5599	FALSE	0.361859	9.56737	4.35786	0.000283404	0.00595565	0.038476
TC1100006831.hg.1	ADM	adrenomedullin	ENSG00000148926	133	FALSE	-0.580284	5.67688	-4.354	0.000286013	0.00599588	0.0294406
TC0X00011174.hg.1	PDZD4	PDZ domain containing 4	ENSG00000067840	57595	FALSE	0.376499	7.8763	4.35399	0.000286018	0.00599588	0.0294236
TC1800008580.hg.1	PSTPIP2	proline-serine-threonine phosphatase interacting protein 2	ENSG00000152229	9050	FALSE	-0.77081	5.68579	-4.35183	0.000287492	0.00601942	0.0243558
TC0700008870.hg.1	CAV2	caveolin 2	ENSG00000105971	858	FALSE	-0.84384	5.81586	-4.35091	0.000288121	0.00602204	0.0222021
TC0600008697.hg.1	NT5E	5'-nucleotidase ecto	ENSG00000135318	4907	FALSE	-0.480259	6.83399	-4.35062	0.000288321	0.00602204	0.021519
TC1000008973.hg.1	TDRD1	tudor domain containing 1	ENSG00000095627	56165	FALSE	-0.896239	3.58725	-4.35	0.000288748	0.00602361	0.0200614
TC0100016121.hg.1	KCNJ10	potassium inwardly rectifying channel subfamily J member 10	ENSG00000177807	3766	FALSE	0.331831	7.6792	4.34881	0.000289564	0.00603329	0.0172787
TC0100014522.hg.1	GNG12	G protein subunit gamma 12	ENSG00000172380	55970	FALSE	-0.296392	7.99349	-4.34749	0.000290475	0.00604492	0.014182
TC0700008762.hg.1	CBLL1	Cbl proto-oncogene like 1	ENSG00000105879	79872	FALSE	0.311478	8.67641	4.34203	0.000294264	0.00611634	0.00140893
TC1800008750.hg.1	TCF4	transcription factor 4	ENSG00000196628	6925	FALSE	0.252587	10.8266	4.34112	0.000294905	0.00612223	-0.000735485
TC2200007953.hg.1	PRODH	proline dehydrogenase 1	ENSG00000100033	5625	TRUE	0.389607	6.96464	4.34	0.000295689	0.00613107	-0.00335109
TC1400007558.hg.1	SUSD6	sushi domain containing 6	ENSG00000100647	9766	FALSE	-0.397929	7.87152	-4.33721	0.000297656	0.0061644	-0.00988636
TC0300008130.hg.1	COL8A1	collagen type VIII alpha 1 chain	ENSG00000144810	1295	FALSE	-0.498709	6.86443	-4.33613	0.00029842	0.00617276	-0.0124128
TC0900011148.hg.1	CTNNAL1	catenin alpha like 1	ENSG00000119326	8727	FALSE	-0.387382	7.71961	-4.33056	0.000302394	0.0062474	-0.0254467
TC1100010400.hg.1	LGR4	leucine rich repeat containing G protein-coupled receptor 4	ENSG00000205213	55366	FALSE	-0.677374	6.23393	-4.31972	0.00031029	0.00640281	-0.0508455
TC1800008338.hg.1	KCTD1	potassium channel tetramerization domain containing 1	ENSG00000134504	284252	FALSE	0.317229	8.38616	4.31453	0.000314138	0.00647442	-0.0629887
TC0200014785.hg.1	FIGN	fidgetin, microtubule severing factor	ENSG00000182263	55137	FALSE	-0.387186	7.7535	-4.30863	0.000318571	0.006551	-0.0767922
TC0800010575.hg.1	CA8	carbonic anhydrase 8	ENSG00000178538	767	FALSE	0.724973	5.0422	4.30857	0.000318619	0.006551	-0.0769412
TC0500007792.hg.1	HEXB	hexosaminidase subunit beta	ENSG00000049860	3074	FALSE	-0.222335	10.2563	-4.30712	0.000319719	0.00656453	-0.0803368
TC0600010071.hg.1	SLC22A1	solute carrier family 22 member 1	ENSG00000175003	6580	FALSE	0.473434	4.43217	4.30655	0.000320149	0.00656453	-0.0816617
TC0400010258.hg.1	LGI2	leucine rich repeat LGI family member 2	ENSG00000153012	55203	FALSE	-0.73587	5.05472	-4.30617	0.000320443	0.00656453	-0.0825648
TC0100011406.hg.1	CD55	CD55 molecule (Cromer blood group)	ENSG00000196352	1604	FALSE	-0.762187	5.87829	-4.30569	0.00032081	0.00656453	-0.0836915
TC0X00008945.hg.1	PRKX	protein kinase X-linked	ENSG00000183943	5613	FALSE	0.521705	7.14165	4.30395	0.000322133	0.00658375	-0.0877471
TC0700008181.hg.1	GNAI1	G protein subunit alpha i1	ENSG00000127955	2770	FALSE	0.384918	8.93255	4.30313	0.000322763	0.0065848	-0.0896717
TC0100015102.hg.1	COL11A1	collagen type XI alpha 1 chain	ENSG00000060718	1301	FALSE	-0.238681	10.1779	-4.30288	0.000322954	0.0065848	-0.0902531
TC0300006520.hg.1	LMCD1	LIM and cysteine rich domains 1	ENSG00000071282	29995	TRUE	-0.389461	6.99723	-4.30195	0.00032367	0.00659156	-0.0924347
TC0100006516.hg.1	VWA1	von Willebrand factor A domain containing 1	ENSG00000179403	64856	FALSE	-0.555466	6.23974	-4.29412	0.000329752	0.00670744	-0.11077
TC0500011935.hg.1	MARCHF3	membrane associated ring-CH-type finger 3	ENSG00000173926	115123	FALSE	0.477802	6.808	4.29313	0.00033053	0.00671528	-0.113089
TC1300008249.hg.1	GJB2	gap junction protein beta 2	ENSG00000165474	2706	FALSE	-0.764299	5.29121	-4.29027	0.000332779	0.00675296	-0.119768
TC0400011395.hg.1	EIF4E	eukaryotic translation initiation factor 4E	ENSG00000151247	1977	FALSE	-0.242472	8.42192	-4.28887	0.000333894	0.00676757	-0.123062
TC0500013240.hg.1	PCDHB4	protocadherin beta 4	ENSG00000081818	56131	FALSE	0.3407	5.06156	4.28722	0.000335207	0.00678615	-0.126927
TC0100009897.hg.1	CA14	carbonic anhydrase 14	ENSG00000118298	23632	FALSE	0.308893	7.17214	4.2851	0.000336899	0.00681236	-0.131886
TC1400007500.hg.1	ARG2	arginase 2	ENSG00000081181	384	FALSE	0.543197	5.94803	4.28206	0.000339343	0.00685259	-0.139004
TC1700007777.hg.1	THRA	thyroid hormone receptor alpha	ENSG00000126351	7067	FALSE	0.337155	9.98713	4.28163	0.000339689	0.00685259	-0.140006
TC0500013342.hg.1	ERAP1	endoplasmic reticulum aminopeptidase 1	ENSG00000164307	51752	FALSE	-0.37078	7.42477	-4.27941	0.000341483	0.00688068	-0.145193
TC0100015781.hg.1	PI4KB	phosphatidylinositol 4-kinase beta	ENSG00000143393	5298	FALSE	-0.259203	8.79672	-4.27659	0.000343783	0.00691888	-0.151802
TC0400010242.hg.1	PPARGC1A	PPARG coactivator 1 alpha	ENSG00000109819	10891	FALSE	0.329105	6.5926	4.27527	0.000344858	0.00693225	-0.154877
TC1000009908.hg.1	RSU1	Ras suppressor protein 1	ENSG00000148484	6251	FALSE	-0.215565	10.0146	-4.27479	0.000345257	0.00693225	-0.156014
TC0100014349.hg.1	JUN	Jun proto-oncogene, AP-1 transcription factor subunit	ENSG00000177606	3725	FALSE	-0.315048	8.8094	-4.2732	0.000346562	0.00695031	-0.15973
TC1100010397.hg.1	CCDC34	coiled-coil domain containing 34	ENSG00000109881	91057	FALSE	-0.265961	8.74215	-4.27162	0.000347865	0.00696828	-0.163423
TC0600013409.hg.1	HIVEP2	HIVEP zinc finger 2	ENSG00000010818	3097	FALSE	-0.490902	6.03386	-4.26762	0.000351188	0.00702458	-0.172784
TC1100006879.hg.1	PARVA	parvin alpha	ENSG00000197702	55742	FALSE	-0.309683	7.54582	-4.26725	0.000351496	0.00702458	-0.173646
TC0600011173.hg.1	GUSBP2	GUSB pseudogene 2	ENSG00000241549	387036	FALSE	0.216567	10.8562	4.2662	0.000352374	0.00703393	-0.176104
TC0100013993.hg.1	PTCH2	patched 2	ENSG00000117425	8643	FALSE	0.487846	6.34047	4.26443	0.000353866	0.00705549	-0.180263
TC2000009949.hg.1	STX16	syntaxin 16	ENSG00000124222	8675	FALSE	0.323644	7.88275	4.26045	0.000357226	0.0071142	-0.189565
TC1900006622.hg.1	NCLN	nicalin	ENSG00000125912	56926	FALSE	-0.321584	7.69459	-4.25959	0.000357962	0.00712057	-0.19159
TC1100008435.hg.1	RNF169	ring finger protein 169	ENSG00000166439	254225	FALSE	-0.353825	8.39635	-4.25809	0.000359236	0.00713764	-0.195089
TC0900010052.hg.1	IGFBPL1	insulin like growth factor binding protein like 1	ENSG00000137142	347252	FALSE	0.343162	8.37887	4.25487	0.000361995	0.00718102	-0.202617
TC1400007285.hg.1	NAA30	N-alpha-acetyltransferase 30, NatC catalytic subunit	ENSG00000139977	122830	FALSE	0.287841	8.66006	4.25457	0.000362258	0.00718102	-0.203334
TC0100011797.hg.1	STUM	stum, mechanosensory transduction mediator homolog	ENSG00000203685	375057	FALSE	0.370908	6.52659	4.25059	0.000365697	0.00724081	-0.212634
TC0600007518.hg.1	HLA-L	major histocompatibility complex, class I, L (pseudogene)	ENSG00000243753	3139	TRUE	-0.299523	8.49738	-4.24776	0.000368164	0.00727713	-0.21925
TC0800008179.hg.1	RIPK2	receptor interacting serine/threonine kinase 2	ENSG00000104312	8767	FALSE	-0.400757	6.83007	-4.24752	0.000368382	0.00727713	-0.219832
TC1000008758.hg.1	CNNM2	cyclin and CBS domain divalent metal cation transport mediator 2	ENSG00000148842	54805	FALSE	0.276655	9.82285	4.24187	0.000373362	0.00736701	-0.233046
TC0100017952.hg.1	MAP1LC3C	microtubule associated protein 1 light chain 3 gamma	ENSG00000197769	440738	FALSE	-0.725272	6.99602	-4.24073	0.000374375	0.0073785	-0.235713
TC1200011225.hg.1	BEST3	bestrophin 3	ENSG00000127325	144453	FALSE	0.367685	7.68052	4.23533	0.000379211	0.00746522	-0.248342
TC0500007415.hg.1	GPX8	glutathione peroxidase 8 (putative)	ENSG00000164294	493869	FALSE	-0.511578	6.71582	-4.23277	0.000381525	0.00749923	-0.254327
TC1200008726.hg.1	TCP11L2	t-complex 11 like 2	ENSG00000166046	255394	FALSE	0.37205	7.84391	4.23245	0.000381814	0.00749923	-0.255074
TC1900007456.hg.1	ZNF253	zinc finger protein 253	ENSG00000256771	56242	FALSE	0.274191	9.74477	4.22926	0.000384721	0.00754767	-0.262536
TC1400007259.hg.1	PELI2	pellino E3 ubiquitin protein ligase family member 2	ENSG00000139946	57161	FALSE	0.376354	8.00925	4.22856	0.000385366	0.00755168	-0.264185
TC0100010499.hg.1	POU2F1	POU class 2 homeobox 1	ENSG00000143190	5451	FALSE	0.319294	8.30274	4.22682	0.000386963	0.00757431	-0.268254
TC0400009704.hg.1	CPLX1	complexin 1	ENSG00000168993	10815	FALSE	0.573925	6.51351	4.22208	0.000391349	0.00765142	-0.279342
TC1900008902.hg.1	BRSK1	BR serine/threonine kinase 1	ENSG00000160469	84446	FALSE	0.449258	7.68563	4.2209	0.000392443	0.00766031	-0.282087
TC0400007169.hg.1	PCDH7	protocadherin 7	ENSG00000169851	5099	FALSE	-0.36642	7.6594	-4.22063	0.000392699	0.00766031	-0.282727
TC1000008733.hg.1	MFSD13A	major facilitator superfamily domain containing 13A	ENSG00000138111	79847	FALSE	0.321674	6.59084	4.21655	0.000396521	0.00772607	-0.292256
TC1900010286.hg.1	UQCRFS1	ubiquinol-cytochrome c reductase, Rieske iron-sulfur polypeptide 1	ENSG00000169021	7386	FALSE	-0.210237	9.37583	-4.21391	0.00039902	0.00776348	-0.298434
TC1900008584.hg.1	MYBPC2	myosin binding protein C2	ENSG00000086967	4606	FALSE	-0.57016	4.1407	-4.21357	0.000399347	0.00776348	-0.299242
TC0900008776.hg.1	MVB12B	multivesicular body subunit 12B	ENSG00000196814	89853	FALSE	0.250128	9.85143	4.21068	0.000402096	0.00780805	-0.305988
TC0500009141.hg.1	GRIA1	glutamate ionotropic receptor AMPA type subunit 1	ENSG00000155511	2890	FALSE	0.277539	9.47413	4.20609	0.000406513	0.00788487	-0.316733
TC0400007345.hg.1	LIMCH1	LIM and calponin homology domains 1	ENSG00000064042	22998	FALSE	-0.273837	9.18392	-4.20347	0.000409047	0.0079228	-0.322845
TC1200009183.hg.1	SETD1B	SET domain containing 1B, histone lysine methyltransferase	ENSG00000139718	23067	FALSE	0.335362	7.52876	4.20312	0.000409393	0.0079228	-0.323677
TC0600009851.hg.1	MTHFD1L	methylenetetrahydrofolate dehydrogenase (NADP+ dependent) 1 like	ENSG00000120254	25902	FALSE	-0.454579	6.97303	-4.2002	0.000412242	0.00795743	-0.330496
TC0900011284.hg.1	AKNA	AT-hook transcription factor	ENSG00000106948	80709	FALSE	0.26804	7.65345	4.19991	0.000412522	0.00795743	-0.331164
TC1300008916.hg.1	CAB39L	calcium binding protein 39 like	ENSG00000102547	81617	FALSE	0.520591	7.61199	4.19986	0.000412577	0.00795743	-0.331294
TC1000009090.hg.1	BAG3	BAG cochaperone 3	ENSG00000151929	9531	FALSE	-0.428858	7.33111	-4.19854	0.000413876	0.00797351	-0.334386
TC0200009005.hg.1	DPP10	dipeptidyl peptidase like 10	ENSG00000175497	57628	FALSE	0.522903	4.73203	4.19539	0.000416986	0.00802441	-0.341749
TC0300011628.hg.1	ROBO1	roundabout guidance receptor 1	ENSG00000169855	6091	FALSE	0.200238	9.93322	4.18961	0.000422753	0.00812625	-0.355254
TC1600006826.hg.1	ABAT	4-aminobutyrate aminotransferase	ENSG00000183044	18	FALSE	0.295609	9.75131	4.18805	0.000424324	0.00813593	-0.358902
TC1300006543.hg.1	FGF9	fibroblast growth factor 9	ENSG00000102678	2254	FALSE	0.672287	5.19911	4.18788	0.000424496	0.00813593	-0.359298
TC1200012698.hg.1	CHPT1	choline phosphotransferase 1	ENSG00000111666	56994	FALSE	-0.364568	8.42937	-4.1877	0.000424682	0.00813593	-0.359729
TC0100016831.hg.1	ASPM	assembly factor for spindle microtubules	ENSG00000066279	259266	FALSE	-0.337971	8.11024	-4.18517	0.000427243	0.00817586	-0.365641
TC0200008464.hg.1	KCNIP3	potassium voltage-gated channel interacting protein 3	ENSG00000115041	30818	FALSE	0.43183	6.16121	4.18395	0.000428478	0.00819033	-0.368478
TC2100007198.hg.1	BACE2	beta-secretase 2	ENSG00000182240	25825	FALSE	-0.332217	7.11056	-4.18149	0.000430994	0.00822925	-0.374235
TC0500013354.hg.1	P4HA2	prolyl 4-hydroxylase subunit alpha 2	ENSG00000072682	8974	FALSE	-0.616552	5.89835	-4.17937	0.000433176	0.00825693	-0.3792
TC1500007067.hg.1	CKMT1A	creatine kinase, mitochondrial 1A	ENSG00000223572	548596	TRUE	0.573791	5.44224	4.17914	0.000433408	0.00825693	-0.379725
TC0X00007075.hg.1	KDM6A	lysine demethylase 6A	ENSG00000147050	7403	FALSE	0.550112	7.54506	4.17858	0.000433983	0.0082587	-0.381028
TC0900011379.hg.1	MEGF9	multiple EGF like domains 9	ENSG00000106780	1955	FALSE	0.234942	9.3978	4.17388	0.000438863	0.00834229	-0.392019
TC0600012815.hg.1	PPIL6	peptidylprolyl isomerase like 6	ENSG00000185250	285755	FALSE	0.555821	7.48487	4.17255	0.000440254	0.00835946	-0.395131
TC0500007016.hg.1	LSP1P3	LSP1 pseudogene 3		729862	FALSE	-0.507843	5.07199	-4.17169	0.000441153	0.00836726	-0.397137
TC2200007356.hg.1	KDELR3	KDEL endoplasmic reticulum protein retention receptor 3	ENSG00000100196	11015	FALSE	-0.678557	5.45616	-4.17083	0.000442058	0.00837515	-0.399151
TC0900008740.hg.1	OLFML2A	olfactomedin like 2A	ENSG00000185585	169611	FALSE	-0.415439	8.67291	-4.16971	0.000443237	0.00837634	-0.401769
TC0200015790.hg.1	CHPF	chondroitin polymerizing factor	ENSG00000123989	79586	FALSE	-0.318473	7.80266	-4.16945	0.000443512	0.00837634	-0.402379
TC0300011264.hg.1	IL17RD	interleukin 17 receptor D	ENSG00000144730	54756	FALSE	0.409198	7.86472	4.16938	0.000443588	0.00837634	-0.402547
TC1700010686.hg.1	JUP	junction plakoglobin	ENSG00000173801	3728	FALSE	0.350186	7.40378	4.16852	0.000444489	0.0083786	-0.40454
TC0600013464.hg.1	SHPRH	SNF2 histone linker PHD RING helicase	ENSG00000146414	257218	FALSE	0.380603	7.83553	4.16832	0.000444698	0.0083786	-0.405003
TC1500007097.hg.1	B2M	beta-2-microglobulin	ENSG00000166710	567	TRUE	-0.199483	10.7573	-4.16787	0.000445176	0.0083786	-0.406058
TC0300009353.hg.1	PPM1L	protein phosphatase, Mg2+/Mn2+ dependent 1L	ENSG00000163590	151742	FALSE	0.48206	6.53435	4.16589	0.000447274	0.00840885	-0.410679
TC0100015401.hg.1	IGSF3	immunoglobulin superfamily member 3	ENSG00000143061	3321	FALSE	0.243272	8.73761	4.16444	0.000448819	0.00842865	-0.414069
TC1600008146.hg.1	HSF4	heat shock transcription factor 4	ENSG00000102878	3299	TRUE	0.507079	7.33663	4.16304	0.00045032	0.00844757	-0.41735
TC0900007115.hg.1	GLIPR2	GLI pathogenesis related 2	ENSG00000122694	152007	FALSE	-0.270037	8.38158	-4.16208	0.000451355	0.00845771	-0.419605
TC1700010529.hg.1	SRCIN1	SRC kinase signaling inhibitor 1	ENSG00000277363	80725	TRUE	0.516739	6.57173	4.15902	0.000454647	0.0085101	-0.426748
TC0400007830.hg.1	ALB	albumin	ENSG00000163631	213	FALSE	1.02684	5.5782	4.15839	0.000455329	0.00851356	-0.428221
TC0200007237.hg.1	CRIM1	cysteine rich transmembrane BMP regulator 1	ENSG00000150938	51232	TRUE	-0.2723	9.63056	-4.15305	0.000461148	0.00861295	-0.440698
TC0500012519.hg.1	SPARC	secreted protein acidic and cysteine rich	ENSG00000113140	6678	FALSE	-0.19842	11.4051	-4.14847	0.000466193	0.00869769	-0.45139
TC0900008441.hg.1	UGCG	UDP-glucose ceramide glucosyltransferase	ENSG00000148154	7357	FALSE	-0.689345	5.71742	-4.14428	0.000470855	0.0087722	-0.461166
TC0200009601.hg.1	MBD5	methyl-CpG binding domain protein 5	ENSG00000204406	55777	FALSE	0.461631	7.48818	4.14397	0.000471211	0.0087722	-0.461908
TC1600011438.hg.1	MLYCD	malonyl-CoA decarboxylase	ENSG00000103150	23417	FALSE	0.348521	6.70265	4.14071	0.00047487	0.00883072	-0.469508
TC1700009969.hg.1	FLII	FLII actin remodeling protein	ENSG00000177731	2314	TRUE	-0.227273	9.42189	-4.13996	0.000475721	0.00883695	-0.471267
TC1200007819.hg.1	CDK2	cyclin dependent kinase 2	ENSG00000123374	1017	FALSE	-0.338118	8.38014	-4.13949	0.000476249	0.00883718	-0.472356
TC0500008296.hg.1	MAN2A1	mannosidase alpha class 2A member 1	ENSG00000112893	4124	FALSE	-0.377363	9.12038	-4.13668	0.000479442	0.00888679	-0.47892
TC2100006951.hg.1	OLIG1	oligodendrocyte transcription factor 1	ENSG00000184221	116448	FALSE	0.791259	6.4372	4.13531	0.000481009	0.0089062	-0.482126
TC1500006788.hg.1	GREM1	gremlin 1, DAN family BMP antagonist	ENSG00000166923	26585	TRUE	-0.562078	6.28457	-4.13137	0.000485538	0.00898036	-0.491332
TC0500006613.hg.1	ADAMTS16	ADAM metallopeptidase with thrombospondin type 1 motif 16	ENSG00000145536	170690	FALSE	-0.329092	8.35922	-4.12995	0.000487183	0.00900105	-0.494653
TC0100010887.hg.1	C1orf21	chromosome 1 open reading frame 21	ENSG00000116667	81563	FALSE	-0.339621	8.85525	-4.12889	0.000488403	0.00900964	-0.497112
TC1200007881.hg.1	INHBE	inhibin subunit beta E	ENSG00000139269	83729	FALSE	-0.43898	5.13885	-4.12864	0.0004887	0.00900964	-0.497707
TC1400010705.hg.1	TEDC1	tubulin epsilon and delta complex 1	ENSG00000185347	283643	FALSE	0.376638	5.94428	4.12767	0.000489824	0.00902066	-0.499964
TC0300012233.hg.1	ITGB5	integrin subunit beta 5	ENSG00000082781	3693	FALSE	0.28642	8.59394	4.12626	0.000491469	0.0090331	-0.503256
TC1400008767.hg.1	STXBP6	syntaxin binding protein 6	ENSG00000168952	29091	FALSE	-0.481949	5.28134	-4.12619	0.000491554	0.0090331	-0.503427
TC0100010121.hg.1	HCN3	hyperpolarization activated cyclic nucleotide gated potassium channel 3	ENSG00000143630	57657	TRUE	0.404502	5.97569	4.12554	0.000492311	0.00903731	-0.504938
TC0200015350.hg.1	RFTN2	raftlin family member 2	ENSG00000162944	130132	FALSE	0.260882	10.0867	4.12212	0.00049633	0.00910133	-0.512923
TC0700012636.hg.1	PODXL	podocalyxin like	ENSG00000128567	5420	FALSE	-0.233069	10.1674	-4.11661	0.000502879	0.00921157	-0.525797
TC1900011777.hg.1	CYTH2	cytohesin 2	ENSG00000105443	9266	FALSE	0.242583	9.95877	4.1151	0.000504687	0.00923481	-0.529321
TC0200013779.hg.1	ST6GAL2	ST6 beta-galactoside alpha-2,6-sialyltransferase 2	ENSG00000144057	84620	FALSE	0.795541	5.60138	4.11442	0.000505499	0.00923979	-0.530899
TC1400010632.hg.1	GPATCH2L	G-patch domain containing 2 like	ENSG00000089916	55668	FALSE	0.285151	8.48476	4.11236	0.000507979	0.00927521	-0.535704
TC0900011523.hg.1	HSPA5	heat shock protein family A (Hsp70) member 5	ENSG00000044574	3309	FALSE	-0.258317	9.88242	-4.09851	0.000524984	0.00957551	-0.568033
TC1000008385.hg.1	STAMBPL1	STAM binding protein like 1	ENSG00000138134	57559	FALSE	0.618207	5.80171	4.0974	0.000526378	0.00959072	-0.570636
TC0200008062.hg.1	ACTG2	actin gamma 2, smooth muscle	ENSG00000163017	72	FALSE	-0.458733	8.10751	-4.09344	0.000531358	0.00967117	-0.57988
TC2100006967.hg.1	IFNGR2	interferon gamma receptor 2	ENSG00000159128	3460	TRUE	-0.216046	9.07759	-4.09186	0.000533354	0.00969718	-0.583559
TC0200009895.hg.1	CERS6	ceramide synthase 6	ENSG00000172292	253782	FALSE	0.299694	10.544	4.0906	0.000534955	0.00971599	-0.586502
TC0200006891.hg.1	RHOB	ras homolog family member B	ENSG00000143878	388	FALSE	-0.232679	9.14851	-4.09002	0.000535695	0.00971912	-0.587858
TC0600014236.hg.1	TXNDC5	thioredoxin domain containing 5	ENSG00000239264	81567	FALSE	-0.34674	7.37635	-4.08817	0.000538048	0.00975149	-0.592161
TC2000006631.hg.1	CRLS1	cardiolipin synthase 1	ENSG00000088766	54675	FALSE	-0.314655	9.04751	-4.0862	0.000540574	0.00978284	-0.596757
TC0800012076.hg.1	ARC	activity regulated cytoskeleton associated protein	ENSG00000198576	23237	FALSE	0.415081	5.74433	4.08593	0.000540921	0.00978284	-0.597387
TC0500006472.hg.1	TRIP13	thyroid hormone receptor interactor 13	ENSG00000071539	9319	FALSE	-0.455736	6.85568	-4.08432	0.000542996	0.00981001	-0.601144
TC1500009736.hg.1	PPIB	peptidylprolyl isomerase B	ENSG00000166794	5479	FALSE	-0.267413	9.32586	-4.08045	0.000548013	0.00988783	-0.61017
TC0600011401.hg.1	C6orf15	chromosome 6 open reading frame 15	ENSG00000204542	29113	TRUE	-0.538701	6.93512	-4.08011	0.000548458	0.00988783	-0.610966
TC0X00009386.hg.1	SRPX	sushi repeat containing protein X-linked	ENSG00000101955	8406	FALSE	-0.338572	8.79071	-4.07771	0.000551596	0.00993395	-0.616566
TC0500007881.hg.1	JMY	junction mediating and regulatory protein, p53 cofactor	ENSG00000152409	133746	FALSE	0.424343	7.96291	4.07442	0.000555932	0.0100015	-0.624249
TC0700007870.hg.1	STAG3L4	stromal antigen 3-like 4 (pseudogene)	ENSG00000106610	64940	FALSE	0.237402	7.99165	4.07058	0.000561025	0.0100826	-0.633197
TC0500010115.hg.1	CTNND2	catenin delta 2	ENSG00000169862	1501	FALSE	0.520517	8.31328	4.06957	0.000562378	0.0100963	-0.63556
TC1900007260.hg.1	TPM4	tropomyosin 4	ENSG00000167460	7171	FALSE	-0.251345	8.94825	-4.06912	0.000562975	0.0100964	-0.636602
TC0200012656.hg.1	EFEMP1	EGF containing fibulin extracellular matrix protein 1	ENSG00000115380	2202	FALSE	-0.435305	6.83806	-4.06314	0.000571039	0.0102279	-0.650554
TC0100006874.hg.1	PLOD1	procollagen-lysine,2-oxoglutarate 5-dioxygenase 1	ENSG00000083444	5351	FALSE	-0.250934	9.00434	-4.0628	0.000571499	0.0102279	-0.651345
TC0100017617.hg.1	H2AW	H2A.W histone	ENSG00000181218	92815	TRUE	0.361017	7.47055	4.06215	0.000572378	0.0102298	-0.652852
TC1700009888.hg.1	CENPV	centromere protein V	ENSG00000166582	201161	FALSE	0.237793	8.36427	4.06184	0.000572802	0.0102298	-0.653579
TC0100016018.hg.1	CRABP2	cellular retinoic acid binding protein 2	ENSG00000143320	1382	FALSE	-0.929381	4.45053	-4.06103	0.000573903	0.0102388	-0.655463
TC0100014040.hg.1	PIK3R3	phosphoinositide-3-kinase regulatory subunit 3	ENSG00000117461	8503	TRUE	0.375573	9.26847	4.05988	0.000575475	0.0102477	-0.658146
TC0100006864.hg.1	DRAXIN	dorsal inhibitory axon guidance protein	ENSG00000162490	374946	FALSE	0.327351	7.18529	4.05979	0.000575598	0.0102477	-0.658356
TC2100008165.hg.1	BRWD1	bromodomain and WD repeat domain containing 1	ENSG00000185658	54014	FALSE	0.287422	8.79786	4.0573	0.000579017	0.0102978	-0.664165
TC0500007681.hg.1	OCLN	occludin	ENSG00000197822	100506658	TRUE	0.442955	7.2719	4.0542	0.0005833	0.0103633	-0.671394
TC0400008391.hg.1	EGF	epidermal growth factor	ENSG00000138798	1950	FALSE	-0.580465	5.52464	-4.05296	0.000585011	0.0103772	-0.674268
TC0300009179.hg.1	MED12L	mediator complex subunit 12L	ENSG00000144893	116931	FALSE	0.507479	6.62171	4.05276	0.000585298	0.0103772	-0.674748
TC0300007797.hg.1	GPR27	G protein-coupled receptor 27	ENSG00000170837	2850	FALSE	0.452666	6.2544	4.05086	0.000587947	0.0104134	-0.679177
TC2200008475.hg.1	PIK3IP1	phosphoinositide-3-kinase interacting protein 1	ENSG00000100100	113791	FALSE	0.352312	7.55606	4.04684	0.000593593	0.0104982	-0.688551
TC2000008499.hg.1	RRBP1	ribosome binding protein 1	ENSG00000125844	6238	FALSE	-0.278026	8.91612	-4.04658	0.000593963	0.0104982	-0.689161
TC2000009178.hg.1	JPH2	junctophilin 2	ENSG00000149596	57158	FALSE	-0.525946	5.61181	-4.04308	0.000598922	0.010575	-0.697316
TC1700009173.hg.1	BAHCC1	BAH domain and coiled-coil containing 1	ENSG00000266074	57597	FALSE	0.366058	6.84047	4.04201	0.000600444	0.0105909	-0.699804
TC2000008852.hg.1	NOL4L	nucleolar protein 4 like	ENSG00000197183	140688	FALSE	0.359413	8.27778	4.03858	0.000605354	0.0106666	-0.707792
TC0100016944.hg.1	ARL8A	ADP ribosylation factor like GTPase 8A	ENSG00000143862	127829	FALSE	0.192639	9.09203	4.03525	0.000610168	0.0107403	-0.715558
TC1700007429.hg.1	ANKRD13B	ankyrin repeat domain 13B	ENSG00000198720	124930	FALSE	0.25989	7.1388	4.03412	0.000611813	0.0107582	-0.718197
TC1100012000.hg.1	GPR83	G protein-coupled receptor 83	ENSG00000123901	10888	FALSE	0.651952	4.24891	4.03193	0.000614994	0.0107785	-0.723282
TC0100013837.hg.1	RIMS3	regulating synaptic membrane exocytosis 3	ENSG00000117016	9783	FALSE	0.375346	7.8206	4.03189	0.000615051	0.0107785	-0.723374
TC0500011748.hg.1	CCDC112	coiled-coil domain containing 112	ENSG00000164221	153733	FALSE	0.292583	7.65022	4.03143	0.000615726	0.0107785	-0.72445
TC0300009016.hg.1	ATP1B3	ATPase Na+/K+ transporting subunit beta 3	ENSG00000069849	483	FALSE	-0.331461	9.23	-4.03068	0.000616827	0.0107785	-0.7262
TC0X00010434.hg.1	SLC25A53	solute carrier family 25 member 53	ENSG00000269743	401612	FALSE	0.344826	6.16537	4.03035	0.000617313	0.0107785	-0.726973
TC1900012001.hg.1	FUZ	fuzzy planar cell polarity protein	ENSG00000010361	80199	FALSE	0.407403	6.821	4.03028	0.000617418	0.0107785	-0.727139
TC1500008955.hg.1	FMN1	formin 1	ENSG00000248905	342184	FALSE	-0.7831	4.0924	-4.02988	0.000618	0.0107785	-0.728064
TC1700008635.hg.1	RGS9	regulator of G protein signaling 9	ENSG00000108370	8787	FALSE	0.811065	4.76591	4.02974	0.00061821	0.0107785	-0.728396
TC0X00007781.hg.1	ZNF711	zinc finger protein 711	ENSG00000147180	7552	FALSE	0.279029	7.90825	4.02945	0.00061863	0.0107785	-0.729062
TC0500007665.hg.1	CCNB1	cyclin B1	ENSG00000134057	891	FALSE	-0.239793	9.0831	-4.0289	0.000619446	0.0107818	-0.730355
TC1200008593.hg.1	SLC17A8	solute carrier family 17 member 8	ENSG00000179520	246213	FALSE	-0.621778	5.97901	-4.02638	0.000623157	0.0108328	-0.73621
TC1800007431.hg.1	MALT1	MALT1 paracaspase	ENSG00000172175	10892	FALSE	-0.419591	7.83618	-4.02565	0.000624238	0.0108328	-0.737909
TC0900007981.hg.1	WNK2	WNK lysine deficient protein kinase 2	ENSG00000165238	65268	FALSE	0.367858	8.03111	4.02563	0.000624278	0.0108328	-0.737973
TC0300010411.hg.1	HACL1	2-hydroxyacyl-CoA lyase 1	ENSG00000131373	26061	FALSE	0.250421	8.3632	4.02481	0.000625488	0.010834	-0.73987
TC1500007619.hg.1	SMAD6	SMAD family member 6	ENSG00000137834	4091	FALSE	-0.793115	5.22505	-4.02453	0.00062591	0.010834	-0.740531
TC1200009307.hg.1	TMEM132B	transmembrane protein 132B	ENSG00000139364	114795	FALSE	-0.352423	5.47571	-4.0243	0.000626243	0.010834	-0.741053
TC1500009429.hg.1	DMXL2	Dmx like 2	ENSG00000104093	23312	FALSE	0.429835	7.37867	4.02375	0.00062707	0.0108374	-0.742346
TC0200015204.hg.1	COL5A2	collagen type V alpha 2 chain	ENSG00000204262	1290	FALSE	-0.562919	4.64698	-4.0222	0.000629378	0.0108636	-0.745949
TC0300009731.hg.1	MAP3K13	mitogen-activated protein kinase kinase kinase 13	ENSG00000073803	9175	FALSE	0.406403	7.32029	4.02188	0.000629858	0.0108636	-0.746695
TC0400010733.hg.1	KDR	kinase insert domain receptor	ENSG00000128052	3791	FALSE	-0.607833	4.8967	-4.02066	0.000631689	0.0108843	-0.749542
TC1200012841.hg.1	SSH1	slingshot protein phosphatase 1	ENSG00000084112	54434	FALSE	0.388123	7.06249	4.01858	0.00063482	0.0109272	-0.754388
TC2200009279.hg.1	SMDT1	single-pass membrane protein with aspartate rich tail 1	ENSG00000183172	91689	TRUE	0.213393	9.46109	4.01575	0.000639095	0.0109897	-0.760967
TC22_KI270734v1_random00006435.hg.1	PRODH	proline dehydrogenase 1	ENSG00000100033	5625	TRUE	0.527386	6.09858	4.01251	0.000644041	0.0110637	-0.768522
TC0600008870.hg.1	FUT9	fucosyltransferase 9	ENSG00000172461	10690	FALSE	0.396068	6.28285	4.012	0.000644828	0.0110661	-0.76972
TC1000010589.hg.1	VSTM4	V-set and transmembrane domain containing 4	ENSG00000165633	196740	FALSE	0.435094	7.0888	4.01065	0.000646899	0.0110905	-0.772863
TC1000009930.hg.1	HACD1	3-hydroxyacyl-CoA dehydratase 1	ENSG00000165996	9200	FALSE	-0.228536	8.82563	-4.01022	0.000647549	0.0110906	-0.773846
TC0300009855.hg.1	IL1RAP	interleukin 1 receptor accessory protein	ENSG00000196083	3556	FALSE	-0.580064	6.63078	-4.00878	0.000649771	0.0111136	-0.777204
TC0900006970.hg.1	NFX1	nuclear transcription factor, X-box binding 1	ENSG00000086102	4799	FALSE	0.309038	9.40797	4.00851	0.000650191	0.0111136	-0.777836
TC0X00009942.hg.1	PJA1	praja ring finger ubiquitin ligase 1	ENSG00000181191	64219	FALSE	0.297392	7.75652	4.0055	0.00065485	0.0111712	-0.784835
TC2200006907.hg.1	SGSM1	small G protein signaling modulator 1	ENSG00000167037	129049	FALSE	0.819668	4.83236	4.00549	0.000654865	0.0111712	-0.784858
TC0X00007507.hg.1	EFNB1	ephrin B1	ENSG00000090776	1947	FALSE	0.294477	9.07954	4.00122	0.000661556	0.0112741	-0.794818
TC1200009546.hg.1	SLC6A12	solute carrier family 6 member 12	ENSG00000111181	6539	FALSE	0.334471	5.16776	3.99887	0.000665254	0.0113258	-0.80028
TC0X00010751.hg.1	DCAF12L2	DDB1 and CUL4 associated factor 12 like 2	ENSG00000198354	340578	FALSE	-0.671361	3.82963	-3.9964	0.000669167	0.0113811	-0.806026
TC0100009902.hg.1	PRPF3	pre-mRNA processing factor 3	ENSG00000117360	9129	FALSE	0.216484	8.84707	3.99303	0.000674544	0.0114612	-0.813867
TC0400007280.hg.1	WDR19	WD repeat domain 19	ENSG00000157796	57728	FALSE	0.445006	7.18377	3.99134	0.000677269	0.0114961	-0.817817
TC0100013545.hg.1	SDC3	syndecan 3	ENSG00000162512	9672	FALSE	-0.259446	10.0004	-3.98951	0.000680204	0.0115345	-0.822055
TC0200011421.hg.1	ING5	inhibitor of growth family member 5	ENSG00000168395	84289	FALSE	0.292479	7.47573	3.98814	0.000682436	0.0115609	-0.825263
TC1400007430.hg.1	SYNE2	spectrin repeat containing nuclear envelope protein 2	ENSG00000054654	23224	FALSE	0.277203	8.26145	3.98457	0.000688236	0.0116477	-0.833555
TC0600014105.hg.1	C2	complement C2	ENSG00000166278	717	TRUE	-0.463649	6.21809	-3.98262	0.000691429	0.0116901	-0.838089
TC1700011910.hg.1	CYTH1	cytohesin 1	ENSG00000108669	9267	FALSE	0.358811	7.02992	3.98216	0.000692192	0.0116915	-0.839169
TC2200007360.hg.1	CBY1	chibby family member 1, beta catenin antagonist	ENSG00000100211	25776	FALSE	0.233821	7.74097	3.98153	0.000693226	0.0116974	-0.84063
TC1100012930.hg.1	B3GAT1	beta-1,3-glucuronyltransferase 1	ENSG00000109956	27087	FALSE	0.277562	8.15995	3.97816	0.000698794	0.0117798	-0.848466
TC1600010617.hg.1	KIAA0895L	KIAA0895 like	ENSG00000196123	653319	FALSE	0.381033	6.94259	3.97759	0.000699737	0.0117841	-0.849788
TC1900006602.hg.1	ZNF555	zinc finger protein 555	ENSG00000186300	148254	FALSE	0.425216	7.26604	3.97352	0.000706543	0.011887	-0.859268
TC1800009029.hg.1	CYB5A	cytochrome b5 type A	ENSG00000166347	1528	FALSE	-0.281386	9.9719	-3.97279	0.00070777	0.0118959	-0.860966
TC0400012818.hg.1	CCNG2	cyclin G2	ENSG00000138764	901	FALSE	0.314321	8.9933	3.97175	0.000709519	0.0119137	-0.863383
TC1600007103.hg.1	CLEC19A	C-type lectin domain containing 19A	ENSG00000261210	728276	FALSE	-0.402715	5.44913	-3.96474	0.000721429	0.0120993	-0.879684
TC0X00010670.hg.1	TMEM255A	transmembrane protein 255A	ENSG00000125355	55026	FALSE	-0.492065	6.86566	-3.96441	0.000721988	0.0120993	-0.880443
TC0700007336.hg.1	HECW1	HECT, C2 and WW domain containing E3 ubiquitin protein ligase 1	ENSG00000002746	23072	FALSE	-0.580353	6.12254	-3.96388	0.0007229	0.0121027	-0.881679
TC0300007206.hg.1	TCAIM	T cell activation inhibitor, mitochondrial	ENSG00000179152	285343	FALSE	0.263984	7.8753	3.96321	0.000724051	0.0121102	-0.883237
TC1200007535.hg.1	CACNB3	calcium voltage-gated channel auxiliary subunit beta 3	ENSG00000167535	784	FALSE	0.239843	8.45947	3.96146	0.000727073	0.0121489	-0.887316
TC0500009856.hg.1	CLPTM1L	CLPTM1 like	ENSG00000049656	81037	TRUE	-0.259602	8.65407	-3.95966	0.000730181	0.0121889	-0.891492
TC0300013520.hg.1	CLDN1	claudin 1	ENSG00000163347	9076	FALSE	-0.375667	6.25868	-3.95716	0.000734525	0.0122495	-0.897299
TC1900009417.hg.1	MLLT1	MLLT1 super elongation complex subunit	ENSG00000130382	4298	FALSE	0.276802	9.98596	3.95666	0.000735408	0.0122523	-0.898476
TC0800007196.hg.1	SMIM18	small integral membrane protein 18	ENSG00000253457	100507341	FALSE	0.669491	5.44656	3.95527	0.000737845	0.0122809	-0.901714
TC0200008261.hg.1	VAMP5	vesicle associated membrane protein 5	ENSG00000168899	10791	FALSE	-0.458722	9.06576	-3.95405	0.000739981	0.0123002	-0.904544
TC0100012760.hg.1	RERE	arginine-glutamic acid dipeptide repeats	ENSG00000142599	473	FALSE	0.257479	9.52069	3.95379	0.000740439	0.0123002	-0.90515
TC1000010727.hg.1	ANK3	ankyrin 3	ENSG00000151150	288	FALSE	-0.511879	6.86772	-3.95162	0.000744264	0.0123518	-0.910194
TC0600007127.hg.1	ID4	inhibitor of DNA binding 4, HLH protein	ENSG00000172201	3400	FALSE	0.519493	7.54415	3.95099	0.000745379	0.0123528	-0.911659
TC1700008455.hg.1	YPEL2	yippee like 2	ENSG00000175155	388403	FALSE	0.466729	4.97777	3.95077	0.00074577	0.0123528	-0.912172
TC0500009319.hg.1	CCNG1	cyclin G1	ENSG00000113328	900	FALSE	-0.295849	9.30018	-3.94778	0.000751068	0.0124192	-0.919102
TC0200015476.hg.1	RAPH1	Ras association (RalGDS/AF-6) and pleckstrin homology domains 1	ENSG00000173166	65059	FALSE	-0.32864	8.39182	-3.94741	0.000751728	0.0124192	-0.919962
TC1600007312.hg.1	IL4R	interleukin 4 receptor	ENSG00000077238	3566	FALSE	-0.401423	7.14847	-3.94729	0.000751955	0.0124192	-0.920258
TC0600013794.hg.1	AGPAT4	1-acylglycerol-3-phosphate O-acyltransferase 4	ENSG00000026652	56895	FALSE	0.304851	8.92073	3.94628	0.000753761	0.0124371	-0.922606
TC1700007858.hg.1	FKBP10	FKBP prolyl isomerase 10	ENSG00000141756	60681	FALSE	-0.221978	10.3645	-3.94525	0.000755598	0.0124554	-0.924989
TC1700007910.hg.1	CNTNAP1	contactin associated protein 1	ENSG00000108797	8506	FALSE	-0.678466	6.02221	-3.94071	0.000763786	0.0125782	-0.935537
TC1100008409.hg.1	PPME1	protein phosphatase methylesterase 1	ENSG00000214517	51400	FALSE	-0.280964	8.68406	-3.93822	0.000768325	0.0126408	-0.941336
TC0600011491.hg.1	HLA-DRB5	major histocompatibility complex, class II, DR beta 5	ENSG00000198502	3127	FALSE	-0.667334	4.35874	-3.9356	0.000773109	0.0127073	-0.947411
TC0100012089.hg.1	GPR137B	G protein-coupled receptor 137B	ENSG00000077585	7107	FALSE	0.369308	8.38278	3.93397	0.000776112	0.012744	-0.951205
TC0300013471.hg.1	BCL6	BCL6 transcription repressor	ENSG00000113916	604	FALSE	-0.386773	8.74265	-3.93358	0.000776828	0.012744	-0.952107
TC1700006773.hg.1	TMEM88	transmembrane protein 88	ENSG00000167874	92162	FALSE	0.364329	6.81689	3.93103	0.000781551	0.0128092	-0.958038
TC1600006754.hg.1	DNAAF8	dynein axonemal assembly factor 8	ENSG00000166246	146562	FALSE	0.443506	4.65657	3.92876	0.000785761	0.0128532	-0.963295
TC2200009350.hg.1	CSNK1E	casein kinase 1 epsilon	ENSG00000213923	1454	FALSE	0.217294	10.6289	3.92864	0.000785998	0.0128532	-0.963591
TC0600011535.hg.1	RGL2	ral guanine nucleotide dissociation stimulator like 2	ENSG00000237441	5863	TRUE	0.263203	8.49488	3.92838	0.000786484	0.0128532	-0.964195
TC1700009032.hg.1	TNRC6C	trinucleotide repeat containing adaptor 6C	ENSG00000078687	57690	FALSE	0.361776	6.81771	3.92557	0.000791733	0.0129266	-0.970703
TC1200008804.hg.1	FAM222A	family with sequence similarity 222 member A	ENSG00000139438	84915	FALSE	0.304839	8.57687	3.92355	0.000795543	0.0129764	-0.9754
TC1500010160.hg.1	CTSH	cathepsin H	ENSG00000103811	1512	FALSE	-0.830165	3.94422	-3.92162	0.000799202	0.0130237	-0.97989
TC0300006925.hg.1	TGFBR2	transforming growth factor beta receptor 2	ENSG00000163513	7048	FALSE	-0.344548	8.45999	-3.91817	0.000805769	0.013112	-0.987896
TC0100017289.hg.1	PTPN14	protein tyrosine phosphatase non-receptor type 14	ENSG00000152104	5784	FALSE	-0.469763	7.52116	-3.91797	0.000806152	0.013112	-0.98836
TC1200008683.hg.1	CHST11	carbohydrate sulfotransferase 11	ENSG00000171310	50515	FALSE	0.301277	10.0032	3.9134	0.000814939	0.0132374	-0.998965
TC1000006794.hg.1	DHTKD1	dehydrogenase E1 and transketolase domain containing 1	ENSG00000181192	55526	FALSE	0.256104	8.28657	3.91316	0.000815404	0.0132374	-0.999523
TC0300010203.hg.1	LHFPL4	LHFPL tetraspan subfamily member 4	ENSG00000156959	375323	FALSE	0.566185	5.67986	3.91198	0.000817691	0.0132619	-1.00226
TC0100016476.hg.1	KIAA0040	KIAA0040	ENSG00000235750	9674	FALSE	-0.666199	4.48031	-3.91097	0.00081966	0.0132813	-1.00461
TC2000007114.hg.1	KIF3B	kinesin family member 3B	ENSG00000101350	9371	FALSE	0.386575	7.56534	3.9062	0.000828981	0.0134147	-1.01567
TC0300007645.hg.1	PTPRG	protein tyrosine phosphatase receptor type G	ENSG00000144724	5793	FALSE	-0.356515	7.52857	-3.90596	0.000829462	0.0134147	-1.01624
TC0300008703.hg.1	PODXL2	podocalyxin like 2	ENSG00000114631	50512	FALSE	0.301071	9.5196	3.90529	0.00083079	0.0134235	-1.01781
TC0100017866.hg.1	MT1HL1	metallothionein 1H like 1	ENSG00000244020	645745	FALSE	-0.448314	4.02188	-3.90246	0.000836386	0.0135012	-1.02437
TC1000009884.hg.1	FAM171A1	family with sequence similarity 171 member A1	ENSG00000148468	221061	FALSE	0.310129	7.66278	3.89978	0.000841706	0.0135743	-1.03057
TC1100007884.hg.1	SLC3A2	solute carrier family 3 member 2	ENSG00000168003	6520	FALSE	-0.190767	9.59489	-3.89921	0.000842853	0.01358	-1.0319
TC1100013087.hg.1	BIRC3	baculoviral IAP repeat containing 3	ENSG00000023445	330	FALSE	-0.528498	4.73229	-3.89525	0.000850806	0.01369	-1.04109
TC1500008616.hg.1	HERC2P3	HERC2 pseudogene 3	ENSG00000180229	283755	FALSE	0.33333	8.52012	3.89502	0.000851276	0.01369	-1.04163
TC1000008668.hg.1	SFXN3	sideroflexin 3	ENSG00000107819	81855	FALSE	-0.305932	7.10316	-3.89423	0.000852875	0.0137028	-1.04346
TC1400007478.hg.1	GPHN	gephyrin	ENSG00000171723	10243	FALSE	0.279269	7.59781	3.89175	0.000857904	0.0137707	-1.04921
TC1900010543.hg.1	ZNF829	zinc finger protein 829	ENSG00000185869	374899	FALSE	0.723538	5.42992	3.88955	0.000862387	0.0138297	-1.05431
TC1200010559.hg.1	VDR	vitamin D receptor	ENSG00000111424	7421	FALSE	-0.593682	6.15193	-3.88909	0.000863337	0.013832	-1.05538
TC0500009411.hg.1	RANBP17	RAN binding protein 17	ENSG00000204764	64901	FALSE	0.310103	9.84376	3.88861	0.000864326	0.0138349	-1.0565
TC2200009142.hg.1	MLC1	modulator of VRAC current 1	ENSG00000100427	23209	FALSE	0.212403	9.94298	3.88771	0.000866165	0.0138514	-1.05858
TC0100013293.hg.1	ID3	inhibitor of DNA binding 3, HLH protein	ENSG00000117318	3399	TRUE	-0.297458	8.63509	-3.88721	0.000867193	0.0138549	-1.05974
TC1300009740.hg.1	LIG4	DNA ligase 4	ENSG00000174405	3981	FALSE	-0.440694	7.03586	-3.88535	0.000871022	0.0139031	-1.06405
TC2000008027.hg.1	NTSR1	neurotensin receptor 1	ENSG00000101188	4923	FALSE	-0.376246	6.6339	-3.88039	0.000881333	0.0140546	-1.07555
TC1900007622.hg.1	ZNF254	zinc finger protein 254	ENSG00000213096	9534	FALSE	0.193469	10.5434	3.87992	0.000882321	0.0140572	-1.07664
TC0600007530.hg.1	HLA-E	major histocompatibility complex, class I, E	ENSG00000204592	3133	TRUE	-0.359939	6.62142	-3.87941	0.000883391	0.0140612	-1.07783
TC1100007727.hg.1	FAM111B	FAM111 trypsin like peptidase B	ENSG00000189057	374393	FALSE	-0.387244	6.52143	-3.87817	0.000885982	0.0140893	-1.08069
TC1900006534.hg.1	APC2	APC regulator of WNT signaling pathway 2	ENSG00000115266	10297	FALSE	0.368919	7.3022	3.87618	0.000890186	0.0141431	-1.08532
TC0100014685.hg.1	ADGRL4	adhesion G protein-coupled receptor L4	ENSG00000162618	64123	FALSE	-0.726488	5.76698	-3.87461	0.000893514	0.0141828	-1.08897
TC0100015284.hg.1	INKA2	inka box actin regulator 2	ENSG00000197852	55924	FALSE	0.401867	5.6641	3.87419	0.000894403	0.0141837	-1.08994
TC0800008122.hg.1	E2F5	E2F transcription factor 5	ENSG00000133740	1875	FALSE	0.256863	9.35852	3.87347	0.000895917	0.0141946	-1.09159
TC0200006627.hg.1	ID2	inhibitor of DNA binding 2	ENSG00000115738	3398	FALSE	0.337568	6.51987	3.87114	0.000900883	0.0142601	-1.09699
TC0700008875.hg.1	MET	MET proto-oncogene, receptor tyrosine kinase	ENSG00000105976	4233	FALSE	-0.560455	5.48697	-3.87059	0.000902056	0.0142655	-1.09826
TC0100008100.hg.1	ARMH1	armadillo like helical domain containing 1	ENSG00000198520	339541	FALSE	0.481366	5.96809	3.86946	0.00090449	0.0142908	-1.1009
TC0600007552.hg.1	DDR1	discoidin domain receptor tyrosine kinase 1	ENSG00000204580	780	TRUE	0.235672	8.22566	3.86842	0.000906714	0.0143127	-1.1033
TC0500010540.hg.1	LIFR	LIF receptor subunit alpha	ENSG00000113594	3977	FALSE	0.38601	8.43346	3.86648	0.000910899	0.0143655	-1.1078
TC0200007536.hg.1	GTF2A1L	general transcription factor IIA subunit 1 like	ENSG00000242441	11036	TRUE	0.57792	6.24148	3.86534	0.000913368	0.0143865	-1.11044
TC0300009673.hg.1	KLHL24	kelch like family member 24	ENSG00000114796	54800	FALSE	0.291766	8.53691	3.86509	0.00091391	0.0143865	-1.11102
TC0200016503.hg.1	POU3F3	POU class 3 homeobox 3	ENSG00000198914	5455	FALSE	0.231519	9.44696	3.86439	0.000915433	0.0143973	-1.11265
TC0700012224.hg.1	LAMB1	laminin subunit beta 1	ENSG00000091136	3912	FALSE	-0.306286	8.74934	-3.8635	0.000917364	0.0144144	-1.11471
TC0200014834.hg.1	STK39	serine/threonine kinase 39	ENSG00000198648	27347	FALSE	0.382444	9.25666	3.8618	0.000921058	0.0144547	-1.11864
TC0100018280.hg.1	LOC644634	uncharacterized LOC644634		644634	TRUE	0.354313	7.51951	3.86148	0.000921762	0.0144547	-1.11938
TC1200008488.hg.1	PLXNC1	plexin C1	ENSG00000136040	10154	FALSE	0.332148	7.1483	3.8609	0.000923025	0.0144547	-1.12072
TC1200009722.hg.1	TNFRSF1A	TNF receptor superfamily member 1A	ENSG00000067182	7132	FALSE	-0.273282	9.47711	-3.86078	0.000923305	0.0144547	-1.12102
TC0X00010032.hg.1	CITED1	Cbp/p300 interacting transactivator with Glu/Asp rich carboxy-terminal domain 1	ENSG00000125931	4435	FALSE	-0.264153	8.11513	-3.85982	0.000925401	0.0144743	-1.12323
TC0X00010329.hg.1	TSPAN6	tetraspanin 6	ENSG00000000003	7105	FALSE	0.210787	9.78162	3.85867	0.000927923	0.0145005	-1.12589
TC0500009676.hg.1	ZNF879	zinc finger protein 879	ENSG00000234284	345462	FALSE	0.484421	5.23231	3.85683	0.000931978	0.0145506	-1.13015
TC0800008324.hg.1	MATN2	matrilin 2	ENSG00000132561	4147	FALSE	0.379419	8.09856	3.85501	0.000936016	0.0146003	-1.13437
TC1400010071.hg.1	CLMN	calmin	ENSG00000165959	79789	FALSE	-0.629928	5.89743	-3.85389	0.000938512	0.0146162	-1.13698
TC0X00009869.hg.1	ARHGEF9	Cdc42 guanine nucleotide exchange factor 9	ENSG00000131089	23229	FALSE	0.230333	10.835	3.85379	0.000938739	0.0146162	-1.13721
TC0700013254.hg.1	PTPRN2	protein tyrosine phosphatase receptor type N2	ENSG00000155093	5799	TRUE	0.359847	6.5083	3.85289	0.000940734	0.0146339	-1.13929
TC0400007270.hg.1	FAM114A1	family with sequence similarity 114 member A1	ENSG00000197712	92689	FALSE	-0.649492	4.58243	-3.85097	0.00094502	0.0146873	-1.14373
TC1100010023.hg.1	RIC3	RIC3 acetylcholine receptor chaperone	ENSG00000166405	79608	FALSE	-0.438891	5.47223	-3.84908	0.000949278	0.0147401	-1.14812
TC1400006723.hg.1	REC8	REC8 meiotic recombination protein	ENSG00000100918	9985	TRUE	0.420854	6.56436	3.84839	0.000950826	0.0147507	-1.14971
TC1000007761.hg.1	ARID5B	AT-rich interaction domain 5B	ENSG00000150347	84159	FALSE	-0.28993	9.36067	-3.84629	0.00095558	0.0148111	-1.15458
TC1200008005.hg.1	RASSF3	Ras association domain family member 3	ENSG00000153179	283349	FALSE	-0.422449	6.33928	-3.84386	0.00096108	0.0148709	-1.16019
TC0200010636.hg.1	MAP2	microtubule associated protein 2	ENSG00000078018	4133	FALSE	0.236344	10.9592	3.84382	0.000961179	0.0148709	-1.16029
TC0500012390.hg.1	JAKMIP2	janus kinase and microtubule interacting protein 2	ENSG00000176049	9832	FALSE	-0.223995	8.94206	-3.84218	0.000964921	0.0149153	-1.16408
TC0900008927.hg.1	NTMT1	N-terminal Xaa-Pro-Lys N-methyltransferase 1	ENSG00000148335	28989	FALSE	-0.252233	9.21618	-3.83462	0.000982366	0.0151713	-1.18158
TC1100009302.hg.1	TECTA	tectorin alpha	ENSG00000109927	7007	FALSE	0.368902	6.98221	3.83419	0.000983366	0.0151731	-1.18257
TC1900006526.hg.1	PWWP3A	PWWP domain containing 3A, DNA repair factor	ENSG00000160953	84939	FALSE	0.518308	6.311	3.83339	0.00098525	0.0151885	-1.18444
TC0800008002.hg.1	HNF4G	hepatocyte nuclear factor 4 gamma	ENSG00000164749	3174	FALSE	-0.608434	4.9311	-3.83278	0.000986669	0.0151916	-1.18585
TC2200007891.hg.1	TMEM121B	transmembrane protein 121B	ENSG00000183307	27439	FALSE	0.568628	6.32327	3.83222	0.000987969	0.0151916	-1.18713
TC0100018463.hg.1	RHOC	ras homolog family member C	ENSG00000155366	389	FALSE	-0.256684	9.77759	-3.83216	0.000988117	0.0151916	-1.18728
TC2200008091.hg.1	PI4KAP2	phosphatidylinositol 4-kinase alpha pseudogene 2	ENSG00000183506	375133	FALSE	0.253605	8.69186	3.82953	0.000994287	0.0152728	-1.19336
TC1500009386.hg.1	GABPB1	GA binding protein transcription factor subunit beta 1	ENSG00000104064	2553	TRUE	0.323993	7.83797	3.82685	0.00100063	0.0153477	-1.19957
TC0X00006603.hg.1	HCCS	holocytochrome c synthase	ENSG00000004961	3052	FALSE	-0.272893	7.71853	-3.82671	0.00100095	0.0153477	-1.19988
TC1200009981.hg.1	HEBP1	heme binding protein 1	ENSG00000013583	50865	FALSE	-0.499776	6.71584	-3.82464	0.00100589	0.015406	-1.20469
TC1700011439.hg.1	TEX2	testis expressed 2	ENSG00000136478	55852	FALSE	-0.320237	8.06059	-3.82436	0.00100656	0.015406	-1.20533
TC2100008496.hg.1	SLC5A3	solute carrier family 5 member 3	ENSG00000198743	6526	TRUE	0.364357	8.78593	3.82365	0.00100824	0.0154179	-1.20696
TC1700012269.hg.1	LINC02210-CRHR1	LINC02210-CRHR1 readthrough	ENSG00000263715	104909134	TRUE	0.333472	7.0027	3.82297	0.00100988	0.0154259	-1.20855
TC0700012041.hg.1	PLOD3	procollagen-lysine,2-oxoglutarate 5-dioxygenase 3	ENSG00000106397	8985	FALSE	-0.254108	7.71776	-3.82248	0.00101105	0.0154259	-1.20968
TC0100009035.hg.1	BTBD8	BTB domain containing 8	ENSG00000189195	284697	FALSE	0.650205	4.36864	3.82231	0.00101146	0.0154259	-1.21008
TC0100015598.hg.1	TXNIP	thioredoxin interacting protein	ENSG00000265972	10628	FALSE	-0.244228	10.3533	-3.82171	0.0010129	0.0154341	-1.21147
TC1500007238.hg.1	TMOD2	tropomodulin 2	ENSG00000128872	29767	FALSE	0.453321	7.73308	3.81963	0.00101789	0.0154964	-1.21627
TC1700012184.hg.1	CHRNB1	cholinergic receptor nicotinic beta 1 subunit	ENSG00000170175	1140	TRUE	-0.583604	5.30123	-3.81659	0.00102526	0.0155946	-1.2233
TC1000011740.hg.1	COL17A1	collagen type XVII alpha 1 chain	ENSG00000065618	1308	TRUE	0.547966	4.95077	3.81364	0.00103244	0.0156896	-1.23012
TC1800009011.hg.1	NETO1	neuropilin and tolloid like 1	ENSG00000166342	81832	FALSE	0.529775	5.24894	3.81328	0.00103333	0.0156896	-1.23096
TC2000009250.hg.1	PLTP	phospholipid transfer protein	ENSG00000100979	5360	FALSE	0.262632	10.3487	3.81272	0.0010347	0.0156964	-1.23225
TC1300009984.hg.1	SLITRK5	SLIT and NTRK like family member 5	ENSG00000165300	26050	FALSE	0.476692	4.79874	3.81184	0.00103686	0.0157153	-1.23428
TC1500010768.hg.1	SCAMP5	secretory carrier membrane protein 5	ENSG00000198794	192683	FALSE	0.412106	6.76978	3.80982	0.00104184	0.0157768	-1.23896
TC2200007088.hg.1	LIMK2	LIM domain kinase 2	ENSG00000182541	3985	FALSE	-0.321879	7.16662	-3.8088	0.00104436	0.0158011	-1.24133
TC0700012512.hg.1	LRRC4	leucine rich repeat containing 4	ENSG00000128594	64101	FALSE	0.321686	7.34354	3.80539	0.00105283	0.0159152	-1.24921
TC1600009533.hg.1	MYH11	myosin heavy chain 11	ENSG00000133392	4629	TRUE	-0.765761	4.62799	-3.80268	0.0010596	0.0160034	-1.25546
TC0200015645.hg.1	ABCA12	ATP binding cassette subfamily A member 12	ENSG00000144452	26154	FALSE	-0.687238	4.01327	-3.80198	0.00106135	0.0160115	-1.25707
TC0600012747.hg.1	CD24	CD24 molecule	ENSG00000272398	100133941	FALSE	-0.302245	7.93442	-3.80172	0.00106201	0.0160115	-1.25767
TC0600012314.hg.1	COL12A1	collagen type XII alpha 1 chain	ENSG00000111799	1303	FALSE	-0.55262	5.44757	-3.79888	0.00106919	0.0161056	-1.26425
TC1200012206.hg.1	KDM2B	lysine demethylase 2B	ENSG00000089094	84678	FALSE	0.244222	8.5156	3.79667	0.0010748	0.0161759	-1.26936
TC1500008008.hg.1	MINAR1	membrane integral NOTCH2 associated receptor 1	ENSG00000169330	23251	FALSE	0.413482	5.49303	3.79561	0.00107749	0.0161926	-1.27179
TC0500011049.hg.1	NAIP	NLR family apoptosis inhibitory protein	ENSG00000249437	4671	TRUE	0.400712	7.60219	3.79549	0.00107781	0.0161926	-1.27208
TC1100009169.hg.1	TAGLN	transgelin	ENSG00000149591	6876	FALSE	-0.251739	10.9911	-3.7932	0.00108366	0.0162662	-1.27736
TC2200006617.hg.1	TBX1	T-box transcription factor 1	ENSG00000184058	6899	FALSE	-0.551516	5.16794	-3.79202	0.00108671	0.0162977	-1.2801
TC0100015756.hg.1	ARNT	aryl hydrocarbon receptor nuclear translocator	ENSG00000143437	405	FALSE	0.312549	7.20228	3.79012	0.00109161	0.016357	-1.2845
TC2100008521.hg.1	B3GALT5	beta-1,3-galactosyltransferase 5	ENSG00000183778	10317	FALSE	0.382855	6.39028	3.78342	0.00110905	0.0166037	-1.29996
TC2000008755.hg.1	ZNF337	zinc finger protein 337	ENSG00000130684	26152	FALSE	0.379727	7.46032	3.7807	0.00111622	0.0166834	-1.30624
TC0300011060.hg.1	RHOA	ras homolog family member A	ENSG00000067560	387	FALSE	-0.244958	9.36826	-3.78066	0.00111632	0.0166834	-1.30633
TC0700013361.hg.1	ZNF713	zinc finger protein 713	ENSG00000178665	349075	FALSE	0.301596	9.2091	3.77495	0.00113151	0.0168957	-1.31951
TC1200010793.hg.1	CSAD	cysteine sulfinic acid decarboxylase	ENSG00000139631	51380	FALSE	0.350899	7.23431	3.77234	0.00113853	0.0169857	-1.32554
TC0800009523.hg.1	MFHAS1	multifunctional ROCO family signaling regulator 1	ENSG00000147324	9258	TRUE	0.243541	8.28351	3.77041	0.00114375	0.0170488	-1.33
TC0100014958.hg.1	BCAR3	BCAR3 adaptor protein, NSP family member	ENSG00000137936	8412	FALSE	-0.211679	9.28269	-3.7676	0.00115137	0.0171474	-1.33648
TC0900009581.hg.1	FREM1	FRAS1 related extracellular matrix 1	ENSG00000164946	158326	FALSE	0.64087	4.43695	3.76698	0.00115308	0.017158	-1.33792
TC0900007163.hg.1	FRMPD1	FERM and PDZ domain containing 1	ENSG00000070601	22844	FALSE	0.496247	5.36996	3.76644	0.00115453	0.0171647	-1.33915
TC1600006513.hg.1	SOX8	SRY-box transcription factor 8	ENSG00000005513	30812	FALSE	0.350066	6.34296	3.7588	0.0011756	0.0174627	-1.35678
TC1100006494.hg.1	CD151	CD151 molecule (Raph blood group)	ENSG00000177697	977	FALSE	-0.305926	9.57446	-3.75694	0.0011808	0.0175247	-1.36108
TC1400007320.hg.1	DACT1	dishevelled binding antagonist of beta catenin 1	ENSG00000165617	51339	FALSE	0.31562	6.73259	3.75423	0.00118839	0.0176221	-1.36733
TC0200016717.hg.1	TBC1D8	TBC1 domain family member 8	ENSG00000204634	11138	FALSE	0.439899	5.26007	3.75255	0.00119314	0.0176772	-1.37121
TC1500009861.hg.1	ITGA11	integrin subunit alpha 11	ENSG00000137809	22801	FALSE	-0.40266	3.91132	-3.75127	0.00119676	0.0177039	-1.37416
TC1600008971.hg.1	JMJD8	jumonji domain containing 8	ENSG00000161999	339123	FALSE	0.321565	9.24479	3.75118	0.00119701	0.0177039	-1.37437
TC0200013567.hg.1	ANKRD36B	ankyrin repeat domain 36B	ENSG00000196912	57730	FALSE	0.277001	9.74431	3.74905	0.00120305	0.0177779	-1.37927
TC1000009851.hg.1	FRMD4A	FERM domain containing 4A	ENSG00000151474	55691	FALSE	-0.241988	10.1955	-3.74197	0.00122338	0.0180394	-1.39561
TC0300011019.hg.1	PLXNB1	plexin B1	ENSG00000164050	5364	FALSE	0.242127	7.18726	3.74187	0.00122365	0.0180394	-1.39582
TC1300009505.hg.1	ABCC4	ATP binding cassette subfamily C member 4	ENSG00000125257	10257	FALSE	-0.44105	5.40132	-3.74178	0.00122391	0.0180394	-1.39602
TC1500008183.hg.1	GOLGA6L3	golgin A6 family like 3	ENSG00000188388	100133220	FALSE	0.401953	8.36802	3.74035	0.00122807	0.0180853	-1.39933
TC0600010002.hg.1	SYNJ2	synaptojanin 2	ENSG00000078269	8871	FALSE	-0.286203	7.20128	-3.73716	0.00123737	0.0182066	-1.40669
TC0600014247.hg.1	RIPOR2	RHO family interacting cell polarization regulator 2	ENSG00000111913	9750	FALSE	0.309351	6.88473	3.73523	0.00124303	0.0182741	-1.41113
TC1900011153.hg.1	RRAS	RAS related	ENSG00000126458	6237	FALSE	-0.393484	6.96559	-3.73023	0.00125782	0.0184757	-1.42265
TC1700008452.hg.1	GDPD1	glycerophosphodiester phosphodiesterase domain containing 1	ENSG00000153982	284161	FALSE	0.307643	7.74709	3.72442	0.0012752	0.0187149	-1.43602
TC0500012070.hg.1	CDKN2AIPNL	CDKN2A interacting protein N-terminal like	ENSG00000237190	91368	FALSE	-0.219038	8.38862	-3.72399	0.0012765	0.0187179	-1.43701
TC1100008999.hg.1	ZC3H12C	zinc finger CCCH-type containing 12C	ENSG00000149289	85463	FALSE	0.281731	8.15987	3.72314	0.00127907	0.0187355	-1.43897
TC1700008438.hg.1	RAD51C	RAD51 paralog C	ENSG00000108384	5889	FALSE	-0.2737	8.52421	-3.72287	0.00127988	0.0187355	-1.43959
TC0100012668.hg.1	CHD5	chromodomain helicase DNA binding protein 5	ENSG00000116254	26038	FALSE	-0.397181	4.91865	-3.718	0.00129472	0.0189365	-1.45082
TC0200010443.hg.1	CFLAR	CASP8 and FADD like apoptosis regulator	ENSG00000003402	8837	FALSE	-0.235316	9.49339	-3.71667	0.00129878	0.0189797	-1.45387
TC1500007659.hg.1	PIAS1	protein inhibitor of activated STAT 1	ENSG00000033800	8554	FALSE	0.267643	8.10828	3.71622	0.00130019	0.018984	-1.45492
TC2200009365.hg.1	CHKB	choline kinase beta	ENSG00000100288	1120	FALSE	0.216545	8.20935	3.7112	0.0013157	0.0191937	-1.46647
TC0300011059.hg.1	GPX1	glutathione peroxidase 1	ENSG00000233276	2876	FALSE	-0.190392	9.87725	-3.71076	0.00131708	0.0191937	-1.46749
TC0800012245.hg.1	ZNF250	zinc finger protein 250	ENSG00000196150	58500	FALSE	0.322335	6.47661	3.71049	0.00131791	0.0191937	-1.4681
TC0100010654.hg.1	KLHL20	kelch like family member 20	ENSG00000076321	27252	FALSE	0.308867	7.88833	3.70992	0.00131967	0.0192031	-1.4694
TC0900009775.hg.1	EQTN	equatorin	ENSG00000120160	54586	FALSE	0.48112	4.79026	3.70949	0.00132102	0.0192064	-1.4704
TC1500006643.hg.1	GABRA5	gamma-aminobutyric acid type A receptor subunit alpha5	ENSG00000186297	2558	FALSE	0.385099	8.03597	3.70554	0.00133341	0.0193701	-1.47949
TC1600006525.hg.1	CACNA1H	calcium voltage-gated channel subunit alpha1 H	ENSG00000196557	8912	FALSE	0.367316	6.5927	3.70502	0.00133505	0.0193775	-1.48068
TC1700008228.hg.1	ITGA3	integrin subunit alpha 3	ENSG00000005884	3675	FALSE	-0.218974	9.13386	-3.7024	0.00134334	0.0194813	-1.48671
TC0100016548.hg.1	ABL2	ABL proto-oncogene 2, non-receptor tyrosine kinase	ENSG00000143322	27	FALSE	-0.387227	7.70952	-3.69909	0.00135388	0.0196175	-1.49432
TC0100008885.hg.1	SPATA1	spermatogenesis associated 1	ENSG00000122432	100505741	FALSE	0.631141	3.67631	3.69853	0.00135568	0.019627	-1.49561
TC1500010720.hg.1	IVD	isovaleryl-CoA dehydrogenase	ENSG00000128928	3712	FALSE	0.278181	7.83128	3.6953	0.00136606	0.0197606	-1.50304
TC0100018454.hg.1	ARHGAP29	Rho GTPase activating protein 29	ENSG00000137962	9411	FALSE	-0.320578	7.55343	-3.69439	0.001369	0.0197864	-1.50513
TC1200008814.hg.1	ANKRD13A	ankyrin repeat domain 13A	ENSG00000076513	88455	FALSE	-0.2846	9.03092	-3.69199	0.00137681	0.0198825	-1.51066
TC0800012285.hg.1	HMBOX1	homeobox containing 1	ENSG00000147421	79618	FALSE	0.311125	6.9338	3.69118	0.00137944	0.0198889	-1.51252
TC0400009223.hg.1	CPE	carboxypeptidase E	ENSG00000109472	1363	FALSE	0.344629	7.59627	3.69114	0.00137958	0.0198889	-1.51262
TC0100018403.hg.1	ERRFI1	ERBB receptor feedback inhibitor 1	ENSG00000116285	54206	FALSE	-0.318621	8.60211	-3.69033	0.00138222	0.0199102	-1.51448
TC1000011370.hg.1	ACTA2	actin alpha 2, smooth muscle	ENSG00000107796	59	FALSE	-0.19792	11.0364	-3.68966	0.00138441	0.0199251	-1.51602
TC0100016789.hg.1	GLRX2	glutaredoxin 2	ENSG00000023572	51022	FALSE	-0.256911	8.252	-3.68801	0.00138979	0.0199767	-1.51979
TC1900011751.hg.1	ZNF222	zinc finger protein 222	ENSG00000159885	7673	FALSE	0.341247	6.81887	3.68774	0.00139068	0.0199767	-1.52042
TC1600007335.hg.1	SBK1	SH3 domain binding kinase 1	ENSG00000188322	388228	FALSE	0.686683	6.88246	3.68749	0.0013915	0.0199767	-1.52099
TC1900010531.hg.1	ZNF461	zinc finger protein 461	ENSG00000197808	92283	FALSE	0.32991	7.65054	3.68562	0.00139768	0.0200486	-1.5253
TC0800009868.hg.1	TNFRSF10B	TNF receptor superfamily member 10b	ENSG00000120889	8795	FALSE	-0.30323	6.13432	-3.68441	0.00140166	0.020089	-1.52807
TC1200010642.hg.1	FAIM2	Fas apoptotic inhibitory molecule 2	ENSG00000135472	23017	FALSE	0.518879	5.80258	3.6801	0.00141602	0.0202778	-1.53799
TC1600006462.hg.1	RAB11FIP3	RAB11 family interacting protein 3	ENSG00000090565	9727	TRUE	0.313246	7.1418	3.67929	0.00141871	0.0202923	-1.53983
TC0400008183.hg.1	BMPR1B	bone morphogenetic protein receptor type 1B	ENSG00000138696	658	FALSE	0.383439	7.48828	3.67878	0.00142042	0.0202923	-1.54101
TC0600014196.hg.1	SNX9	sorting nexin 9	ENSG00000130340	51429	FALSE	-0.318104	8.23867	-3.67873	0.00142059	0.0202923	-1.54112
TC0700006645.hg.1	USP42	ubiquitin specific peptidase 42	ENSG00000106346	84132	FALSE	0.254926	8.90696	3.67817	0.00142248	0.0203024	-1.54242
TC1000011923.hg.1	GFRA1	GDNF family receptor alpha 1	ENSG00000151892	2674	FALSE	-0.537718	6.03863	-3.67665	0.00142761	0.0203585	-1.54591
TC1900007012.hg.1	LDLR	low density lipoprotein receptor	ENSG00000130164	3949	TRUE	0.24615	7.79184	3.67628	0.00142884	0.0203592	-1.54675
TC0400007784.hg.1	AMBN	ameloblastin	ENSG00000178522	258	FALSE	0.532009	5.54554	3.67492	0.00143345	0.0203943	-1.54989
TC0900011021.hg.1	TEX10	testis expressed 10	ENSG00000136891	54881	FALSE	-0.471373	7.93427	-3.67464	0.0014344	0.0203943	-1.55054
TC0400012768.hg.1	FAM200B	family with sequence similarity 200 member B	ENSG00000237765	285550	FALSE	-0.220162	10.1418	-3.6745	0.00143488	0.0203943	-1.55086
TC1500009218.hg.1	ZSCAN29	zinc finger and SCAN domain containing 29	ENSG00000140265	146050	FALSE	0.365818	7.11808	3.67413	0.0014361	0.0203948	-1.55169
TC0200010696.hg.1	SPAG16	sperm associated antigen 16	ENSG00000144451	79582	FALSE	0.287887	7.63634	3.67336	0.00143873	0.0204152	-1.55347
TC0100008607.hg.1	RAVER2	ribonucleoprotein, PTB binding 2	ENSG00000162437	55225	FALSE	0.286369	8.54805	3.67191	0.00144366	0.0204533	-1.55679
TC1100010216.hg.1	PLEKHA7	pleckstrin homology domain containing A7	ENSG00000166689	144100	FALSE	0.457031	6.55914	3.67187	0.0014438	0.0204533	-1.55689
TC1700012324.hg.1	ABR	ABR activator of RhoGEF and GTPase	ENSG00000159842	29	TRUE	-0.296869	8.62715	-3.66994	0.00145041	0.0205299	-1.56133
TC0300008558.hg.1	DTX3L	deltex E3 ubiquitin ligase 3L	ENSG00000163840	151636	FALSE	-0.211543	8.84125	-3.66952	0.00145185	0.0205333	-1.5623
TC0700007477.hg.1	UPP1	uridine phosphorylase 1	ENSG00000183696	7378	FALSE	-0.343016	7.02527	-3.66653	0.00146211	0.0206614	-1.56915
TC1100007762.hg.1	OOSP2	oocyte secreted protein 2	ENSG00000149507	219990	TRUE	-0.544448	4.02415	-3.66258	0.00147581	0.0208378	-1.57822
TC0900011286.hg.1	WHRN	whirlin	ENSG00000095397	25861	FALSE	0.22601	7.59809	3.65869	0.00148943	0.0210127	-1.58715
TC1900006848.hg.1	CAMSAP3	calmodulin regulated spectrin associated protein family member 3	ENSG00000076826	57662	FALSE	0.347465	6.10767	3.65718	0.00149474	0.0210703	-1.59061
TC1200012802.hg.1	PAN2	poly(A) specific ribonuclease subunit PAN2	ENSG00000135473	9924	TRUE	0.30587	7.49043	3.65654	0.00149701	0.021085	-1.59209
TC0600009327.hg.1	PKIB	cAMP-dependent protein kinase inhibitor beta	ENSG00000135549	5570	FALSE	-0.514635	3.95432	-3.65476	0.00150332	0.0211565	-1.59618
TC1200012635.hg.1	PRR13	proline rich 13	ENSG00000205352	54458	FALSE	-0.227153	8.03079	-3.6537	0.00150707	0.0211731	-1.5986
TC0200007052.hg.1	EMILIN1	elastin microfibril interfacer 1	ENSG00000138080	11117	FALSE	-0.36503	5.70923	-3.65351	0.00150775	0.0211731	-1.59904
TC0600009534.hg.1	MYB	MYB proto-oncogene, transcription factor	ENSG00000118513	4602	FALSE	0.337148	6.01951	3.65338	0.00150821	0.0211731	-1.59933
TC1100013165.hg.1	SLC43A3	solute carrier family 43 member 3	ENSG00000134802	29015	FALSE	-0.397486	6.83781	-3.65238	0.00151178	0.0212057	-1.60163
TC2200008717.hg.1	NPTXR	neuronal pentraxin receptor	ENSG00000221890	23467	FALSE	0.44492	5.97741	3.65177	0.00151395	0.0212188	-1.60303
TC0500008568.hg.1	SLC12A2	solute carrier family 12 member 2	ENSG00000064651	6558	FALSE	-0.340376	7.5721	-3.65097	0.00151682	0.0212386	-1.60487
TC1900010032.hg.1	CERS1	ceramide synthase 1	ENSG00000223802	10715	TRUE	0.294369	8.58831	3.65068	0.00151784	0.0212386	-1.60552
TC1100007445.hg.1	CREB3L1	cAMP responsive element binding protein 3 like 1	ENSG00000157613	90993	FALSE	-0.447986	5.89315	-3.65012	0.00151984	0.0212492	-1.6068
TC0800010648.hg.1	CYP7B1	cytochrome P450 family 7 subfamily B member 1	ENSG00000172817	9420	FALSE	0.356836	6.7149	3.64925	0.00152298	0.0212647	-1.60881
TC1700007949.hg.1	ARL4D	ADP ribosylation factor like GTPase 4D	ENSG00000175906	379	FALSE	0.340972	6.23255	3.64912	0.00152343	0.0212647	-1.60909
TC1800007396.hg.1	ONECUT2	one cut homeobox 2	ENSG00000119547	9480	FALSE	0.598641	6.47058	3.6465	0.0015329	0.0213521	-1.61512
TC1000007990.hg.1	DDIT4	DNA damage inducible transcript 4	ENSG00000168209	54541	FALSE	0.249387	7.63198	3.64623	0.00153386	0.0213521	-1.61572
TC0X00009179.hg.1	RAI2	retinoic acid induced 2	ENSG00000131831	10742	FALSE	0.469005	6.45455	3.64608	0.00153442	0.0213521	-1.61608
TC0200014912.hg.1	DLX2	distal-less homeobox 2	ENSG00000115844	1746	FALSE	0.268328	10.3153	3.64584	0.00153529	0.0213521	-1.61663
TC0200011147.hg.1	TRPM8	transient receptor potential cation channel subfamily M member 8	ENSG00000144481	79054	FALSE	-0.414052	6.05915	-3.64566	0.00153593	0.0213521	-1.61703
TC1200006730.hg.1	RIMKLB	ribosomal modification protein rimK like family member B	ENSG00000166532	57494	FALSE	0.275442	8.78447	3.64212	0.00154881	0.0215137	-1.62515
TC0600009753.hg.1	STXBP5	syntaxin binding protein 5	ENSG00000164506	134957	FALSE	-0.491338	6.66104	-3.63425	0.00157784	0.0218993	-1.6432
TC0400011180.hg.1	SCD5	stearoyl-CoA desaturase 5	ENSG00000145284	79966	FALSE	0.250137	9.19494	3.63231	0.00158506	0.0219666	-1.64764
TC0300014082.hg.1	ETV5	ETS variant transcription factor 5	ENSG00000244405	2119	FALSE	-0.296123	9.42153	-3.63218	0.00158557	0.0219666	-1.64795
TC0100010416.hg.1	PBX1	PBX homeobox 1	ENSG00000185630	5087	FALSE	0.226787	10.2747	3.63192	0.00158654	0.0219666	-1.64854
TC0500012272.hg.1	SLC25A2	solute carrier family 25 member 2	ENSG00000120329	83884	FALSE	0.692226	4.8454	3.63082	0.00159066	0.0220058	-1.65106
TC2200007655.hg.1	PPARA	peroxisome proliferator activated receptor alpha	ENSG00000186951	5465	FALSE	0.438413	7.10897	3.6288	0.00159824	0.0220928	-1.65568
TC0300012238.hg.1	HEG1	heart development protein with EGF like domains 1	ENSG00000173706	57493	FALSE	-0.242485	8.6612	-3.62748	0.00160321	0.0221437	-1.6587
TC1100011867.hg.1	FZD4	frizzled class receptor 4	ENSG00000174804	8322	FALSE	-0.482078	6.35927	-3.627	0.00160504	0.0221511	-1.65981
TC0100010775.hg.1	SOAT1	sterol O-acyltransferase 1	ENSG00000057252	6646	FALSE	-0.418909	6.56042	-3.62632	0.00160761	0.0221687	-1.66136
TC1200009621.hg.1	FOXM1	forkhead box M1	ENSG00000111206	2305	FALSE	-0.194146	8.97708	-3.62361	0.0016179	0.0222927	-1.66757
TC0100007477.hg.1	ARID1A	AT-rich interaction domain 1A	ENSG00000117713	8289	FALSE	0.195669	8.75235	3.62253	0.00162204	0.0223317	-1.67004
TC1200007251.hg.1	RESF1	retroelement silencing factor 1	ENSG00000174718	55196	FALSE	0.432957	6.48195	3.61905	0.00163539	0.0224975	-1.67801
TC0500013130.hg.1	TRIM52	tripartite motif containing 52	ENSG00000183718	84851	FALSE	0.415901	6.52874	3.61801	0.00163942	0.0225347	-1.6804
TC0300007237.hg.1	LIMD1	LIM domain containing 1	ENSG00000144791	8994	FALSE	-0.383365	7.93693	-3.61523	0.00165021	0.0226492	-1.68677
TC1400006659.hg.1	MMP14	matrix metallopeptidase 14	ENSG00000157227	4323	FALSE	-0.33459	8.81947	-3.61518	0.00165039	0.0226492	-1.68688
TC2100007175.hg.1	IGSF5	immunoglobulin superfamily member 5	ENSG00000183067	150084	FALSE	0.362739	6.40309	3.61214	0.00166224	0.0227936	-1.69383
TC0600008348.hg.1	ZNF451	zinc finger protein 451	ENSG00000112200	26036	FALSE	0.231965	9.33587	3.60901	0.00167455	0.0229441	-1.70099
TC1600008698.hg.1	GSE1	Gse1 coiled-coil protein	ENSG00000131149	23199	FALSE	0.391863	8.10347	3.60776	0.0016795	0.0229935	-1.70386
TC1200012590.hg.1	LRRC23	leucine rich repeat containing 23	ENSG00000010626	10233	FALSE	0.317535	6.95292	3.60085	0.00170708	0.0233524	-1.71967
TC0X00008776.hg.1	ZNF275	zinc finger protein 275	ENSG00000063587	10838	FALSE	0.26615	7.54947	3.59846	0.00171673	0.0234656	-1.72514
TC0300007086.hg.1	TTC21A	tetratricopeptide repeat domain 21A	ENSG00000168026	199223	TRUE	0.288841	6.55767	3.59798	0.00171867	0.0234656	-1.72624
TC0100007958.hg.1	ZFP69B	ZFP69 zinc finger protein B	ENSG00000187801	65243	FALSE	0.480314	5.85152	3.59765	0.00172	0.0234656	-1.72699
TC0100014531.hg.1	WLS	Wnt ligand secretion mediator	ENSG00000116729	79971	FALSE	0.243616	11.167	3.59721	0.00172177	0.0234656	-1.72799
TC1100011141.hg.1	RCOR2	REST corepressor 2	ENSG00000167771	283248	FALSE	0.338602	6.9477	3.5971	0.00172221	0.0234656	-1.72824
TC2200008067.hg.1	THAP7	THAP domain containing 7	ENSG00000184436	80764	FALSE	0.209719	7.94577	3.59507	0.00173047	0.0235594	-1.73288
TC0300011757.hg.1	PROS1	protein S	ENSG00000184500	5627	FALSE	-0.745641	4.64992	-3.5937	0.00173606	0.0236164	-1.73602
TC1400009679.hg.1	FAM161B	FAM161 centrosomal protein B	ENSG00000156050	145483	FALSE	0.295315	6.5267	3.59337	0.00173741	0.0236164	-1.73677
TC1200010699.hg.1	POU6F1	POU class 6 homeobox 1	ENSG00000184271	5463	FALSE	0.310915	6.89311	3.59119	0.00174636	0.0237192	-1.74176
TC0400011477.hg.1	CENPE	centromere protein E	ENSG00000138778	1062	FALSE	-0.286714	6.47878	-3.58798	0.0017596	0.0238801	-1.74909
TC0600012542.hg.1	UBE2J1	ubiquitin conjugating enzyme E2 J1	ENSG00000198833	51465	FALSE	-0.240494	9.37209	-3.58588	0.00176834	0.0239797	-1.7539
TC0200010007.hg.1	SP9	Sp9 transcription factor	ENSG00000217236	100131390	FALSE	0.345026	8.68996	3.58481	0.00177281	0.0240091	-1.75634
TC1700007716.hg.1	MLLT6	MLLT6, PHD finger containing	ENSG00000275023	4302	TRUE	0.269311	7.82441	3.58422	0.00177525	0.0240091	-1.75768
TC0400006987.hg.1	LAP3	leucine aminopeptidase 3	ENSG00000002549	51056	FALSE	-0.20934	9.15171	-3.58408	0.00177583	0.0240091	-1.758
TC1700011795.hg.1	PRPSAP1	phosphoribosyl pyrophosphate synthetase associated protein 1	ENSG00000161542	5635	FALSE	0.240044	8.38018	3.58402	0.00177611	0.0240091	-1.75815
TC0500012023.hg.1	KIF3A	kinesin family member 3A	ENSG00000131437	11127	FALSE	0.364304	8.33825	3.582	0.00178457	0.0241044	-1.76276
TC1000010758.hg.1	RTKN2	rhotekin 2	ENSG00000182010	219790	FALSE	-0.347265	7.34819	-3.58126	0.00178769	0.0241274	-1.76446
TC1500008995.hg.1	GOLGA8B	golgin A8 family member B	ENSG00000215252	440270	TRUE	0.288035	7.40089	3.58064	0.0017903	0.0241436	-1.76587
TC1000008400.hg.1	IFIT1	interferon induced protein with tetratricopeptide repeats 1	ENSG00000185745	3434	FALSE	-0.480139	5.47341	-3.58011	0.00179251	0.0241544	-1.76707
TC0600006653.hg.1	RIPK1	receptor interacting serine/threonine kinase 1	ENSG00000137275	8737	FALSE	-0.330122	7.91675	-3.57859	0.00179896	0.0242223	-1.77056
TC0100006997.hg.1	SLC25A34	solute carrier family 25 member 34	ENSG00000162461	284723	FALSE	0.308484	6.62824	3.57799	0.00180148	0.0242347	-1.77192
TC0100018434.hg.1	MYCBP	MYC binding protein	ENSG00000214114	26292	TRUE	-0.23623	9.34	-3.5777	0.00180271	0.0242347	-1.77258
TC0300008046.hg.1	ARL13B	ADP ribosylation factor like GTPase 13B	ENSG00000169379	200894	FALSE	0.29706	8.63039	3.57705	0.00180547	0.0242528	-1.77406
TC0300010952.hg.1	LRRC2	leucine rich repeat containing 2	ENSG00000163827	79442	FALSE	0.533778	5.05932	3.57584	0.00181065	0.0243034	-1.77684
TC1100007394.hg.1	CD82	CD82 molecule	ENSG00000085117	3732	FALSE	0.573162	5.68687	3.57476	0.00181522	0.0243456	-1.77929
TC1000009725.hg.1	SFMBT2	Scm like with four mbt domains 2	ENSG00000198879	57713	FALSE	0.38334	5.80349	3.5729	0.0018232	0.0244334	-1.78354
TC1200007561.hg.1	SPATS2	spermatogenesis associated serine rich 2	ENSG00000123352	65244	FALSE	0.247834	8.7315	3.57225	0.00182599	0.0244518	-1.78503
TC1900009592.hg.1	ZNF562	zinc finger protein 562	ENSG00000171466	54811	FALSE	0.254485	8.19873	3.57062	0.00183301	0.0245065	-1.78875
TC0500007901.hg.1	THBS4	thrombospondin 4	ENSG00000113296	7060	FALSE	0.408241	6.74805	3.57062	0.00183303	0.0245065	-1.78876
TC1600009865.hg.1	NUPR1	nuclear protein 1, transcriptional regulator	ENSG00000176046	26471	FALSE	-0.330695	7.07067	-3.57022	0.00183476	0.0245065	-1.78967
TC0300013458.hg.1	RPL39L	ribosomal protein L39 like	ENSG00000163923	116832	FALSE	-0.432549	7.20563	-3.56964	0.00183724	0.0245065	-1.79098
TC2200009266.hg.1	GTPBP1	GTP binding protein 1	ENSG00000100226	9567	FALSE	0.293074	6.76249	3.56964	0.00183724	0.0245065	-1.79098
TC0600009744.hg.1	RAB32	RAB32, member RAS oncogene family	ENSG00000118508	10981	FALSE	-0.391349	7.07106	-3.56665	0.00185022	0.0246605	-1.79781
TC0700011961.hg.1	GJC3	gap junction protein gamma 3	ENSG00000176402	349149	FALSE	0.473816	5.56193	3.56618	0.00185227	0.0246686	-1.79889
TC0X00009250.hg.1	ACOT9	acyl-CoA thioesterase 9	ENSG00000123130	23597	FALSE	-0.30487	7.87206	-3.5657	0.00185438	0.0246775	-1.79999
TC1500006806.hg.1	RYR3	ryanodine receptor 3	ENSG00000198838	6263	FALSE	0.898223	4.54	3.56358	0.00186364	0.0247673	-1.80482
TC1900008345.hg.1	MEIOSIN	meiosis initiator	ENSG00000237452	388553	FALSE	0.54329	4.68981	3.56328	0.00186493	0.0247673	-1.8055
TC0300009202.hg.1	MBNL1	muscleblind like splicing regulator 1	ENSG00000152601	4154	FALSE	-0.292742	9.10615	-3.56312	0.00186565	0.0247673	-1.80587
TC0300011313.hg.1	FAM3D	FAM3 metabolism regulating signaling molecule D	ENSG00000198643	131177	FALSE	-0.347624	4.87063	-3.56283	0.00186691	0.0247673	-1.80652
TC2200007556.hg.1	MPPED1	metallophosphoesterase domain containing 1	ENSG00000186732	758	FALSE	0.388995	5.46382	3.56198	0.00187067	0.0247893	-1.80847
TC0300008994.hg.1	PXYLP1	2-phosphoxylose phosphatase 1	ENSG00000155893	92370	FALSE	0.220317	8.33717	3.5618	0.00187146	0.0247893	-1.80888
TC1100011299.hg.1	RBM4B	RNA binding motif protein 4B	ENSG00000173914	83759	FALSE	0.192394	9.26265	3.55987	0.00187997	0.0248827	-1.81328
TC0100011382.hg.1	DYRK3	dual specificity tyrosine phosphorylation regulated kinase 3	ENSG00000143479	8444	FALSE	0.288123	8.17692	3.55929	0.00188253	0.0248974	-1.81461
TC0X00006977.hg.1	MID1IP1	MID1 interacting protein 1	ENSG00000165175	58526	FALSE	0.368992	7.42322	3.55767	0.00188972	0.0249732	-1.8183
TC0300013104.hg.1	EIF5A2	eukaryotic translation initiation factor 5A2	ENSG00000163577	56648	FALSE	-0.429308	6.10464	-3.55457	0.00190356	0.0251366	-1.82538
TC0X00007153.hg.1	UXT-AS1	UXT antisense RNA 1	ENSG00000267064	100133957	FALSE	0.354611	5.9153	3.55379	0.00190706	0.0251635	-1.82716
TC1200007653.hg.1	NR4A1	nuclear receptor subfamily 4 group A member 1	ENSG00000123358	3164	FALSE	0.282299	7.93616	3.55094	0.00191989	0.0253133	-1.83366
TC2000007336.hg.1	PPP1R16B	protein phosphatase 1 regulatory subunit 16B	ENSG00000101445	26051	FALSE	0.483942	5.04194	3.55055	0.00192165	0.025317	-1.83455
TC0X00009929.hg.1	OPHN1	oligophrenin 1	ENSG00000079482	4983	FALSE	0.286378	8.77068	3.54915	0.00192796	0.0253806	-1.83772
TC0X00007537.hg.1	KIF4A	kinesin family member 4A	ENSG00000090889	24137	FALSE	-0.366975	6.80057	-3.54866	0.00193019	0.0253904	-1.83885
TC0900010789.hg.1	IARS1	isoleucyl-tRNA synthetase 1	ENSG00000196305	3376	FALSE	-0.336802	8.51989	-3.54794	0.00193348	0.0254143	-1.8405
TC1200012610.hg.1	SSPN	sarcospan	ENSG00000123096	8082	FALSE	-0.352499	6.84547	-3.54547	0.00194471	0.0255422	-1.84611
TC2100008229.hg.1	C2CD2	C2 calcium dependent domain containing 2	ENSG00000157617	25966	FALSE	-0.351197	6.36329	-3.54209	0.00196027	0.0257268	-1.85384
TC1700006772.hg.1	KDM6B	lysine demethylase 6B	ENSG00000132510	23135	FALSE	0.38407	7.74167	3.53785	0.00197989	0.0259645	-1.86349
TC0300013513.hg.1	P3H2	prolyl 3-hydroxylase 2	ENSG00000090530	55214	FALSE	-0.202826	8.40792	-3.53635	0.00198686	0.0260359	-1.8669
TC0700012971.hg.1	ZNF425	zinc finger protein 425	ENSG00000204947	155054	FALSE	0.361095	6.18445	3.53507	0.00199288	0.0260825	-1.86983
TC0100012897.hg.1	NPPA	natriuretic peptide A	ENSG00000175206	4878	FALSE	0.485133	5.63704	3.53494	0.00199346	0.0260825	-1.87011
TC1800007186.hg.1	SETBP1	SET binding protein 1	ENSG00000152217	26040	FALSE	0.266781	9.93888	3.53157	0.0020093	0.0262536	-1.87778
TC0300011651.hg.1	GBE1	1,4-alpha-glucan branching enzyme 1	ENSG00000114480	2632	FALSE	-0.516364	5.11987	-3.53151	0.0020096	0.0262536	-1.87792
TC1100009982.hg.1	DCHS1	dachsous cadherin-related 1	ENSG00000166341	8642	FALSE	0.183514	9.38217	3.53096	0.00201218	0.0262672	-1.87917
TC1500010233.hg.1	MEX3B	mex-3 RNA binding family member B	ENSG00000183496	84206	FALSE	0.3846	7.38309	3.52982	0.00201759	0.0263178	-1.88177
TC0100013641.hg.1	AK2	adenylate kinase 2	ENSG00000004455	204	FALSE	-0.177066	9.05511	-3.52943	0.00201944	0.0263219	-1.88266
TC2100008508.hg.1	CHAF1B	chromatin assembly factor 1 subunit B	ENSG00000159259	8208	FALSE	-0.263601	7.82696	-3.52844	0.00202416	0.0263633	-1.88492
TC1300009781.hg.1	COL4A1	collagen type IV alpha 1 chain	ENSG00000187498	1282	FALSE	-0.351335	6.64742	-3.52635	0.00203409	0.0264726	-1.88966
TC1000007846.hg.1	SIRT1	sirtuin 1	ENSG00000096717	23411	FALSE	0.302746	8.60925	3.52602	0.00203571	0.0264735	-1.89043
TC1100013012.hg.1	STX3	syntaxin 3	ENSG00000166900	6809	FALSE	-0.458542	5.54453	-3.52422	0.00204434	0.0265257	-1.89453
TC1200012588.hg.1	P3H3	prolyl 3-hydroxylase 3	ENSG00000110811	10536	FALSE	-0.358185	7.99913	-3.52392	0.00204575	0.0265257	-1.8952
TC1000011904.hg.1	ABLIM1	actin binding LIM protein 1	ENSG00000099204	3983	FALSE	0.200968	10.668	3.52375	0.00204658	0.0265257	-1.89559
TC0400009038.hg.1	TMEM131L	transmembrane 131 like	ENSG00000121210	23240	FALSE	0.41789	8.27734	3.52361	0.00204727	0.0265257	-1.89592
TC1700010717.hg.1	STAT5B	signal transducer and activator of transcription 5B	ENSG00000173757	6777	FALSE	0.300862	7.33427	3.52357	0.00204747	0.0265257	-1.89601
TC0300011364.hg.1	CADPS	calcium dependent secretion activator	ENSG00000163618	8618	FALSE	0.725016	4.37716	3.52032	0.00206316	0.0266703	-1.90341
TC0500007895.hg.1	CMYA5	cardiomyopathy associated 5	ENSG00000164309	202333	FALSE	-0.604791	4.67505	-3.5203	0.00206321	0.0266703	-1.90343
TC0X00006623.hg.1	PRPS2	phosphoribosyl pyrophosphate synthetase 2	ENSG00000101911	5634	FALSE	-0.368577	6.16481	-3.52029	0.0020633	0.0266703	-1.90347
TC0300007336.hg.1	ATRIP	ATR interacting protein	ENSG00000164053	84126	TRUE	-0.253747	8.38123	-3.51791	0.00207486	0.0267994	-1.90888
TC0900007006.hg.1	PRSS3	serine protease 3	ENSG00000010438	5646	FALSE	0.561995	3.92688	3.51675	0.00208053	0.0268524	-1.91153
TC0100007784.hg.1	AGO4	argonaute RISC component 4	ENSG00000134698	192670	FALSE	0.349197	7.4539	3.51402	0.00209388	0.0270044	-1.91772
TC1700011558.hg.1	SLC16A6	solute carrier family 16 member 6	ENSG00000108932	9120	FALSE	-0.410638	5.75344	-3.51128	0.00210742	0.0271586	-1.92397
TC0700012755.hg.1	KIAA1549	KIAA1549	ENSG00000122778	57670	FALSE	0.299363	7.96349	3.50922	0.00211761	0.0272694	-1.92864
TC1200008920.hg.1	OAS3	2'-5'-oligoadenylate synthetase 3	ENSG00000111331	4940	FALSE	-0.363172	6.80887	-3.50833	0.00212207	0.0273063	-1.93067
TC0300014073.hg.1	PLCH1	phospholipase C eta 1	ENSG00000114805	23007	FALSE	-0.365757	8.65073	-3.50767	0.00212534	0.0273279	-1.93217
TC0400011175.hg.1	TMEM150C	transmembrane protein 150C	ENSG00000249242	441027	FALSE	0.541073	5.71041	3.50683	0.00212952	0.027361	-1.93407
TC1900008287.hg.1	NECTIN2	nectin cell adhesion molecule 2	ENSG00000130202	5819	FALSE	-0.232952	7.89386	-3.50616	0.00213288	0.027376	-1.9356
TC1800008824.hg.1	LMAN1	lectin, mannose binding 1	ENSG00000074695	3998	FALSE	-0.205791	8.80368	-3.50596	0.00213388	0.027376	-1.93605
TC0700006864.hg.1	SP4	Sp4 transcription factor	ENSG00000105866	6671	FALSE	0.351646	6.98952	3.50401	0.0021437	0.0274814	-1.9405
TC0400009322.hg.1	GALNT7	polypeptide N-acetylgalactosaminyltransferase 7	ENSG00000109586	51809	FALSE	-0.305843	7.98829	-3.50282	0.00214969	0.0275376	-1.9432
TC1000009007.hg.1	PNLIPRP2	pancreatic lipase related protein 2 (gene/pseudogene)	ENSG00000266200	5408	FALSE	0.284767	5.47033	3.50166	0.00215553	0.0275917	-1.94582
TC0900008145.hg.1	CCDC180	coiled-coil domain containing 180	ENSG00000197816	100499483	TRUE	0.409092	5.64622	3.49654	0.00218161	0.0279047	-1.95747
TC2000009292.hg.1	ZMYND8	zinc finger MYND-type containing 8	ENSG00000101040	23613	FALSE	0.254556	9.46785	3.49622	0.00218326	0.027905	-1.9582
TC0200016252.hg.1	HDAC4	histone deacetylase 4	ENSG00000068024	9759	FALSE	0.286493	7.98026	3.49581	0.00218536	0.027911	-1.95913
TC0600010235.hg.1	AFDN	afadin, adherens junction formation factor	ENSG00000130396	4301	FALSE	0.235971	9.14131	3.49256	0.00220206	0.028086	-1.9665
TC0700009770.hg.1	DPP6	dipeptidyl peptidase like 6	ENSG00000130226	1804	FALSE	0.360442	6.95592	3.49251	0.00220234	0.028086	-1.96662
TC0700013368.hg.1	ZNF736	zinc finger protein 736	ENSG00000234444	728927	FALSE	0.313832	7.91421	3.48796	0.00222598	0.0283475	-1.97696
TC0300006513.hg.1	GRM7	glutamate metabotropic receptor 7	ENSG00000196277	2917	FALSE	0.571006	4.40488	3.48792	0.00222615	0.0283475	-1.97703
TC0500013336.hg.1	SSBP2	single stranded DNA binding protein 2	ENSG00000145687	23635	FALSE	0.240082	10.1372	3.48634	0.00223446	0.0284321	-1.98064
TC0100015716.hg.1	MTMR11	myotubularin related protein 11	ENSG00000014914	10903	FALSE	-0.309044	7.00775	-3.48405	0.00224648	0.028561	-1.98583
TC0500011194.hg.1	F2RL2	coagulation factor II thrombin receptor like 2	ENSG00000164220	2151	FALSE	-0.536842	5.18913	-3.48377	0.00224793	0.028561	-1.98645
TC1400007732.hg.1	VASH1	vasohibin 1	ENSG00000071246	22846	FALSE	0.325445	7.0776	3.48268	0.00225372	0.0286134	-1.98894
TC1900006522.hg.1	MIDN	midnolin	ENSG00000167470	90007	FALSE	0.219528	9.3849	3.48191	0.00225778	0.0286437	-1.99068
TC1300006919.hg.1	FREM2	FRAS1 related extracellular matrix 2	ENSG00000150893	341640	FALSE	0.284461	9.32448	3.47944	0.0022709	0.0287889	-1.99629
TC0500008884.hg.1	PCDHB13	protocadherin beta 13	ENSG00000187372	56123	FALSE	0.493757	6.70112	3.47453	0.00229718	0.029094	-2.00742
TC0300007435.hg.1	DOCK3	dedicator of cytokinesis 3	ENSG00000088538	1795	FALSE	0.321732	7.11828	3.4743	0.00229841	0.029094	-2.00794
TC0100016218.hg.1	RGS5	regulator of G protein signaling 5	ENSG00000143248	8490	TRUE	-0.36685	8.76325	-3.47399	0.00230007	0.029094	-2.00864
TC0100007574.hg.1	EPB41	erythrocyte membrane protein band 4.1	ENSG00000159023	2035	FALSE	0.390665	6.76705	3.47367	0.00230185	0.029095	-2.00938
TC1200007590.hg.1	AQP2	aquaporin 2	ENSG00000167580	359	FALSE	0.421314	5.79501	3.47325	0.00230411	0.0291021	-2.01033
TC0300007883.hg.1	FRG2C	FSHD region gene 2 family member C	ENSG00000172969	100288801	FALSE	0.483882	4.25689	3.47263	0.00230746	0.029123	-2.01174
TC0300013831.hg.1	SEMA3B	semaphorin 3B	ENSG00000012171	7869	TRUE	-0.260506	8.04836	-3.47207	0.00231049	0.0291398	-2.01301
TC1700006775.hg.1	CHD3	chromodomain helicase DNA binding protein 3	ENSG00000170004	1107	FALSE	0.232573	8.37769	3.46963	0.00232371	0.0292849	-2.01853
TC1100007429.hg.1	MAPK8IP1	mitogen-activated protein kinase 8 interacting protein 1	ENSG00000121653	9479	FALSE	0.314349	7.29458	3.46919	0.00232611	0.0292936	-2.01953
TC0700008517.hg.1	ZKSCAN1	zinc finger with KRAB and SCAN domains 1	ENSG00000106261	7586	FALSE	0.195885	9.06022	3.46751	0.00233532	0.029388	-2.02335
TC0100015244.hg.1	KCNA2	potassium voltage-gated channel subfamily A member 2	ENSG00000177301	3737	FALSE	0.376305	6.31401	3.46205	0.00236539	0.0297295	-2.03572
TC0300013123.hg.1	PLD1	phospholipase D1	ENSG00000075651	5337	FALSE	-0.41652	5.48566	-3.46195	0.00236593	0.0297295	-2.03594
TC0900008953.hg.1	ASS1	argininosuccinate synthase 1	ENSG00000130707	445	FALSE	-0.196683	10.067	-3.46105	0.00237091	0.0297522	-2.03798
TC0700013356.hg.1	EPDR1	ependymin related 1	ENSG00000086289	54749	FALSE	-0.416993	7.65837	-3.461	0.00237121	0.0297522	-2.0381
TC0900012173.hg.1	GARNL3	GTPase activating Rap/RanGAP domain like 3	ENSG00000136895	84253	FALSE	0.315132	7.29512	3.45909	0.00238183	0.0298636	-2.04242
TC1500010368.hg.1	HAPLN3	hyaluronan and proteoglycan link protein 3	ENSG00000140511	145864	FALSE	-0.487683	5.301	-3.45516	0.00240388	0.0300988	-2.05133
TC0X00009268.hg.1	PCYT1B	phosphate cytidylyltransferase 1B, choline	ENSG00000102230	9468	FALSE	0.256533	8.61373	3.45512	0.00240411	0.0300988	-2.05142
TC0300013090.hg.1	PHC3	polyhomeotic homolog 3	ENSG00000173889	80012	FALSE	0.245982	9.15481	3.45324	0.00241471	0.0302095	-2.05568
TC1200008615.hg.1	MYBPC1	myosin binding protein C1	ENSG00000196091	4604	FALSE	-0.616797	4.61101	-3.45208	0.00242128	0.0302696	-2.0583
TC1700010230.hg.1	MYO18A	myosin XVIIIA	ENSG00000196535	399687	TRUE	0.320364	7.45863	3.45113	0.00242665	0.0303145	-2.06044
TC0700010155.hg.1	TNRC18	trinucleotide repeat containing 18	ENSG00000182095	84629	FALSE	0.26528	7.78828	3.44649	0.0024532	0.0306128	-2.07096
TC1200009247.hg.1	TMED2	transmembrane p24 trafficking protein 2	ENSG00000086598	10959	FALSE	-0.174347	10.2664	-3.44633	0.0024541	0.0306128	-2.07132
TC0800007351.hg.1	TACC1	transforming acidic coiled-coil containing protein 1	ENSG00000147526	6867	FALSE	-0.241287	7.61253	-3.44528	0.00246014	0.0306445	-2.07369
TC0100013796.hg.1	PABPC4	poly(A) binding protein cytoplasmic 4	ENSG00000090621	8761	FALSE	-0.30816	8.23863	-3.44518	0.00246072	0.0306445	-2.07392
TC0200014404.hg.1	MCM6	minichromosome maintenance complex component 6	ENSG00000076003	4175	FALSE	-0.27406	8.09492	-3.44495	0.00246201	0.0306445	-2.07443
TC0300012191.hg.1	PARP9	poly(ADP-ribose) polymerase family member 9	ENSG00000138496	83666	FALSE	-0.192568	8.87713	-3.44423	0.00246621	0.0306745	-2.07608
TC0100006550.hg.1	PRKCZ	protein kinase C zeta	ENSG00000067606	5590	FALSE	0.378793	5.86008	3.44347	0.00247057	0.0307064	-2.07778
TC0100013003.hg.1	AGMAT	agmatinase	ENSG00000116771	79814	FALSE	-0.612666	4.81593	-3.44159	0.0024815	0.0308185	-2.08205
TC0900007563.hg.1	TMC1	transmembrane channel like 1	ENSG00000165091	117531	FALSE	0.563963	4.01814	3.4413	0.00248319	0.0308185	-2.08271
TC1100013111.hg.1	CHEK1	checkpoint kinase 1	ENSG00000149554	1111	FALSE	-0.241883	8.46349	-3.43757	0.00250497	0.0310664	-2.09115
TC1400010715.hg.1	AJUBA	ajuba LIM protein	ENSG00000129474	84962	FALSE	-0.299799	9.63693	-3.43629	0.00251248	0.0311193	-2.09404
TC0300006873.hg.1	LRRC3B	leucine rich repeat containing 3B	ENSG00000179796	116135	FALSE	0.633753	4.80974	3.43622	0.00251287	0.0311193	-2.09419
TC0400006637.hg.1	ZBTB49	zinc finger and BTB domain containing 49	ENSG00000168826	166793	FALSE	0.393574	6.3651	3.43344	0.0025293	0.0313	-2.10048
TC1700009079.hg.1	C1QTNF1	C1q and TNF related 1	ENSG00000173918	114897	FALSE	-0.24371	7.13909	-3.43154	0.00254054	0.0314165	-2.10477
TC0500012059.hg.1	VDAC1	voltage dependent anion channel 1	ENSG00000213585	7416	FALSE	-0.346273	8.16202	-3.42937	0.00255351	0.0315256	-2.10969
TC0600013852.hg.1	C6orf118	chromosome 6 open reading frame 118	ENSG00000112539	168090	FALSE	0.409085	7.18081	3.42886	0.00255652	0.0315256	-2.11083
TC1100012492.hg.1	TREH	trehalase	ENSG00000118094	11181	FALSE	0.48588	3.73864	3.42884	0.00255667	0.0315256	-2.11089
TC0700011948.hg.1	FAM200A	family with sequence similarity 200 member A	ENSG00000221909	221786	FALSE	0.277595	7.03935	3.42883	0.00255673	0.0315256	-2.11091
TC0400010418.hg.1	RELL1	RELT like 1	ENSG00000181826	768211	FALSE	-0.238655	10.0063	-3.42823	0.00256029	0.0315469	-2.11225
TC1100011128.hg.1	ATL3	atlastin GTPase 3	ENSG00000184743	25923	FALSE	-0.363895	5.98008	-3.42782	0.00256279	0.0315549	-2.11319
TC1400008021.hg.1	CHGA	chromogranin A	ENSG00000100604	1113	TRUE	0.309361	4.87847	3.42732	0.00256579	0.0315691	-2.11432
TC1700011774.hg.1	TRIM47	tripartite motif containing 47	ENSG00000132481	91107	FALSE	-0.265575	8.36004	-3.42615	0.00257278	0.0316325	-2.11695
TC0200011362.hg.1	RNPEPL1	arginyl aminopeptidase like 1	ENSG00000142327	57140	FALSE	-0.26756	7.24812	-3.42451	0.00258269	0.0317315	-2.12066
TC2000008909.hg.1	EIF2S2	eukaryotic translation initiation factor 2 subunit beta	ENSG00000125977	8894	FALSE	-0.204436	10.0123	-3.42261	0.00259421	0.0318305	-2.12496
TC2100006976.hg.1	ITSN1	intersectin 1	ENSG00000205726	6453	FALSE	0.251686	8.28867	3.42239	0.00259554	0.0318305	-2.12546
TC1000010172.hg.1	SVIL	supervillin	ENSG00000197321	6840	FALSE	-0.352037	6.27833	-3.42226	0.00259633	0.0318305	-2.12575
TC0600014126.hg.1	BICRAL	BICRA like chromatin remodeling complex associated protein	ENSG00000112624	23506	FALSE	0.310656	6.32218	3.42195	0.0025982	0.0318307	-2.12645
TC0900008150.hg.1	TMOD1	tropomodulin 1	ENSG00000136842	7111	FALSE	0.271654	7.78738	3.42058	0.00260655	0.0319102	-2.12955
TC0300008133.hg.1	CMSS1	cms1 ribosomal small subunit homolog	ENSG00000184220	84319	FALSE	-0.257671	7.80476	-3.41935	0.00261403	0.0319689	-2.13232
TC0800007065.hg.1	CDCA2	cell division cycle associated 2	ENSG00000184661	157313	FALSE	-0.288038	6.60577	-3.41918	0.00261508	0.0319689	-2.1327
TC1900011007.hg.1	AP2S1	adaptor related protein complex 2 subunit sigma 1	ENSG00000042753	1175	FALSE	-0.166322	10.4115	-3.41778	0.00262368	0.0320512	-2.13587
TC0100013659.hg.1	CSMD2	CUB and Sushi multiple domains 2	ENSG00000121904	114784	FALSE	-0.311553	5.82686	-3.41681	0.00262962	0.0320851	-2.13806
TC1900009433.hg.1	TUBB4A	tubulin beta 4A class IVa	ENSG00000104833	10382	FALSE	0.234122	8.32106	3.41671	0.0026302	0.0320851	-2.13827
TC0600013126.hg.1	PTPRK	protein tyrosine phosphatase receptor type K	ENSG00000152894	5796	TRUE	0.395748	7.14397	3.4146	0.00264321	0.0322208	-2.14303
TC1000009286.hg.1	NPS	neuropeptide S	ENSG00000214285	594857	FALSE	-0.483815	5.24231	-3.41372	0.00264868	0.0322646	-2.14503
TC0600010056.hg.1	WTAP	WT1 associated protein	ENSG00000146457	9589	FALSE	0.277842	7.89701	3.41029	0.00266998	0.0325009	-2.15277
TC0200010264.hg.1	MFSD6	major facilitator superfamily domain containing 6	ENSG00000151690	54842	FALSE	0.332591	7.2084	3.40918	0.00267697	0.0325628	-2.15529
TC0900012227.hg.1	FBXO10	F-box protein 10	ENSG00000147912	26267	TRUE	0.290831	8.25858	3.40791	0.00268488	0.0326359	-2.15814
TC0300010372.hg.1	GRIP2	glutamate receptor interacting protein 2	ENSG00000144596	80852	FALSE	0.405469	6.03731	3.40558	0.00269955	0.0327909	-2.1634
TC0X00007558.hg.1	NLGN3	neuroligin 3	ENSG00000196338	54413	FALSE	0.307075	8.44087	3.40511	0.00270254	0.032804	-2.16447
TC0900006564.hg.1	RIC1	RIC1 homolog, RAB6A GEF complex partner 1	ENSG00000107036	57589	FALSE	-0.306383	7.70727	-3.40454	0.00270615	0.0328245	-2.16575
TC0100018344.hg.1	LYPLAL1	lysophospholipase like 1	ENSG00000143353	127018	FALSE	-0.239062	8.34709	-3.40354	0.00271245	0.0328776	-2.168
TC2000006872.hg.1	INSM1	INSM transcriptional repressor 1	ENSG00000173404	3642	FALSE	0.222982	10.5136	3.40291	0.00271644	0.0328869	-2.16942
TC1500008971.hg.1	AVEN	apoptosis and caspase activation inhibitor	ENSG00000169857	57099	FALSE	-0.329702	7.76475	-3.40282	0.00271705	0.0328869	-2.16963
TC0700010396.hg.1	POLR1F	RNA polymerase I subunit F	ENSG00000105849	221830	FALSE	-0.256797	8.09713	-3.40178	0.00272367	0.0329438	-2.17199
TC1900011641.hg.1	OAZ1	ornithine decarboxylase antizyme 1	ENSG00000104904	4946	FALSE	-0.210838	10.0618	-3.39881	0.0027426	0.0331492	-2.17867
TC1200006888.hg.1	CDKN1B	cyclin dependent kinase inhibitor 1B	ENSG00000111276	1027	FALSE	0.271744	10.0096	3.39849	0.00274468	0.033151	-2.1794
TC0700013420.hg.1	ARPC1B	actin related protein 2/3 complex subunit 1B	ENSG00000130429	10095	FALSE	-0.37882	6.30499	-3.39794	0.00274819	0.03317	-2.18063
TC2100006997.hg.1	CLIC6	chloride intracellular channel 6	ENSG00000159212	54102	FALSE	-0.638501	4.62463	-3.39759	0.00275045	0.033174	-2.18143
TC1000009997.hg.1	MIR1915HG	MIR1915 host gene	ENSG00000204682	399726	FALSE	0.280993	7.20317	3.39467	0.0027693	0.0333777	-2.18802
TC0100018437.hg.1	MKNK1	MAPK interacting serine/threonine kinase 1	ENSG00000079277	8569	FALSE	-0.254287	6.76124	-3.39377	0.00277507	0.0334238	-2.19003
TC0500010511.hg.1	CPLANE1	ciliogenesis and planar polarity effector complex subunit 1	ENSG00000197603	65250	FALSE	0.294109	7.97554	3.39194	0.00278698	0.0335436	-2.19416
TC0400011578.hg.1	CASP6	caspase 6	ENSG00000138794	839	FALSE	-0.228128	8.99941	-3.38822	0.00281133	0.033791	-2.20255
TC0900012139.hg.1	PGM5	phosphoglucomutase 5	ENSG00000154330	5239	FALSE	0.326516	6.32825	3.38801	0.00281268	0.033791	-2.20302
TC1200011320.hg.1	BBS10	Bardet-Biedl syndrome 10	ENSG00000179941	79738	FALSE	0.262911	8.40785	3.38789	0.00281345	0.033791	-2.20328
TC0100008797.hg.1	AK5	adenylate kinase 5	ENSG00000154027	26289	FALSE	0.608213	6.20019	3.38713	0.00281848	0.0338108	-2.20501
TC1600007235.hg.1	PLK1	polo like kinase 1	ENSG00000166851	5347	FALSE	-0.209408	9.76206	-3.38704	0.00281905	0.0338108	-2.2052
TC2100008251.hg.1	TFF1	trefoil factor 1	ENSG00000160182	7031	FALSE	-0.36565	5.61864	-3.38662	0.00282185	0.0338208	-2.20616
TC0700009174.hg.1	MKLN1	muskelin 1	ENSG00000128585	4289	FALSE	0.322575	8.38651	3.38422	0.00283767	0.0339865	-2.21155
TC0600007410.hg.1	ZSCAN9	zinc finger and SCAN domain containing 9	ENSG00000137185	7746	FALSE	0.321592	6.69924	3.38298	0.0028459	0.0340379	-2.21434
TC1300010007.hg.1	TMEM255B	transmembrane protein 255B	ENSG00000184497	348013	TRUE	-0.629191	5.01064	-3.38298	0.00284593	0.0340379	-2.21435
TC0900008587.hg.1	TLR4	toll like receptor 4	ENSG00000136869	7099	FALSE	-0.369546	5.99909	-3.38183	0.00285354	0.0341051	-2.21693
TC0500007457.hg.1	SETD9	SET domain containing 9	ENSG00000155542	133383	FALSE	-0.342126	6.80227	-3.38046	0.0028627	0.0341907	-2.22002
TC1500007121.hg.1	SPATA5L1	spermatogenesis associated 5 like 1	ENSG00000171763	79029	FALSE	0.204485	8.55291	3.37792	0.00287975	0.0343703	-2.22575
TC1100007453.hg.1	MDK	midkine	ENSG00000110492	4192	FALSE	-0.184025	9.90847	-3.37425	0.00290447	0.0346286	-2.23399
TC0700009647.hg.1	ZNF862	zinc finger protein 862	ENSG00000106479	643641	FALSE	0.345242	7.65432	3.37411	0.00290543	0.0346286	-2.23431
TC0400006685.hg.1	WFS1	wolframin ER transmembrane glycoprotein	ENSG00000109501	7466	FALSE	-0.202856	8.64148	-3.37261	0.00291562	0.0347108	-2.23769
TC1200009221.hg.1	HIP1R	huntingtin interacting protein 1 related	ENSG00000130787	9026	FALSE	0.353933	6.01826	3.37237	0.00291727	0.0347108	-2.23823
TC0100008034.hg.1	ZNF691	zinc finger protein 691	ENSG00000164011	51058	FALSE	0.334385	5.72894	3.37206	0.00291939	0.0347108	-2.23893
TC1300008381.hg.1	AMER2	APC membrane recruitment protein 2	ENSG00000165566	219287	FALSE	0.614148	4.72809	3.3719	0.00292044	0.0347108	-2.23928
TC2100008495.hg.1	IL10RB	interleukin 10 receptor subunit beta	ENSG00000243646	3588	FALSE	-0.3291	7.25889	-3.36986	0.0029344	0.0348485	-2.24388
TC2200008831.hg.1	PMM1	phosphomannomutase 1	ENSG00000100417	5372	FALSE	-0.238822	7.51403	-3.36961	0.00293609	0.0348485	-2.24443
TC1500010244.hg.1	AP3B2	adaptor related protein complex 3 subunit beta 2	ENSG00000103723	8120	FALSE	0.431804	6.45777	3.36734	0.00295171	0.0350096	-2.24955
TC0100015023.hg.1	DPYD	dihydropyrimidine dehydrogenase	ENSG00000188641	1806	FALSE	-0.244089	8.15177	-3.36703	0.00295381	0.0350104	-2.25024
TC1600006926.hg.1	SNN	stannin	ENSG00000184602	8303	FALSE	0.253166	7.03861	3.36662	0.00295667	0.0350199	-2.25117
TC0X00007134.hg.1	USP11	ubiquitin specific peptidase 11	ENSG00000102226	8237	FALSE	0.155038	10.3162	3.36619	0.00295959	0.0350304	-2.25212
TC2200009246.hg.1	ZNRF3	zinc and ring finger 3	ENSG00000183579	84133	FALSE	0.262067	7.7377	3.36564	0.00296344	0.0350517	-2.25337
TC0600009381.hg.1	CENPW	centromere protein W	ENSG00000203760	387103	FALSE	-0.203599	8.51691	-3.36044	0.00299955	0.0354544	-2.26505
TC1500010369.hg.1	MFGE8	milk fat globule EGF and factor V/VIII domain containing	ENSG00000140545	4240	FALSE	-0.253451	8.42528	-3.35788	0.00301751	0.035642	-2.2708
TC2000007083.hg.1	ID1	inhibitor of DNA binding 1, HLH protein	ENSG00000125968	3397	FALSE	-0.675865	4.44663	-3.35753	0.00302002	0.0356471	-2.27161
TC1800006508.hg.1	MYL12B	myosin light chain 12B	ENSG00000118680	103910	FALSE	-0.184321	10.5906	-3.35576	0.00303246	0.0357693	-2.27557
TC0800008487.hg.1	RIMS2	regulating synaptic membrane exocytosis 2	ENSG00000176406	9699	FALSE	0.53938	6.22137	3.35525	0.00303611	0.0357789	-2.27673
TC1600011513.hg.1	BOLA2	bolA family member 2	ENSG00000183336	552900	TRUE	-0.234853	8.19368	-3.35506	0.00303746	0.0357789	-2.27715
TC1600008008.hg.1	DRC7	dynein regulatory complex subunit 7	ENSG00000159625	84229	FALSE	0.274039	5.93768	3.35464	0.00304045	0.0357896	-2.2781
TC1100011300.hg.1	SPTBN2	spectrin beta, non-erythrocytic 2	ENSG00000173898	6712	FALSE	0.45916	5.5592	3.35382	0.00304626	0.0358334	-2.27994
TC1500007346.hg.1	CGNL1	cingulin like 1	ENSG00000128849	84952	FALSE	-0.546995	4.82267	-3.35198	0.00305935	0.0359557	-2.28408
TC0900010995.hg.1	ALG2	ALG2 alpha-1,3/1,6-mannosyltransferase	ENSG00000119523	85365	FALSE	-0.20174	9.55476	-3.35177	0.00306086	0.0359557	-2.28455
TC0100011320.hg.1	CNTN2	contactin 2	ENSG00000184144	6900	FALSE	-0.347193	6.72105	-3.34965	0.00307602	0.036082	-2.28931
TC1200011968.hg.1	HECTD4	HECT domain E3 ubiquitin protein ligase 4	ENSG00000173064	283450	TRUE	0.261275	8.97073	3.34959	0.0030764	0.036082	-2.28943
TC1100010712.hg.1	ARHGAP1	Rho GTPase activating protein 1	ENSG00000175220	392	FALSE	0.214002	9.41977	3.34938	0.00307793	0.036082	-2.28991
TC1100011677.hg.1	WNT11	Wnt family member 11	ENSG00000085741	7481	FALSE	-0.509908	6.50791	-3.34733	0.00309269	0.0362302	-2.29452
TC0700012467.hg.1	TMEM229A	transmembrane protein 229A	ENSG00000234224	730130	FALSE	0.557358	4.35155	3.34658	0.00309807	0.0362684	-2.29619
TC1500006930.hg.1	EIF2AK4	eukaryotic translation initiation factor 2 alpha kinase 4	ENSG00000128829	440275	FALSE	-0.315023	8.69008	-3.3433	0.00312184	0.0365217	-2.30356
TC0100016794.hg.1	B3GALT2	beta-1,3-galactosyltransferase 2	ENSG00000162630	8707	FALSE	0.294957	7.32416	3.34097	0.00313883	0.0366767	-2.30878
TC0400009379.hg.1	SPCS3	signal peptidase complex subunit 3	ENSG00000129128	60559	FALSE	-0.251388	8.37404	-3.3409	0.00313938	0.0366767	-2.30895
TC1200006771.hg.1	CLEC2D	C-type lectin domain family 2 member D	ENSG00000069493	29121	FALSE	0.423261	6.89985	3.34013	0.00314497	0.0367027	-2.31067
TC0600008873.hg.1	UFL1	UFM1 specific ligase 1	ENSG00000014123	23376	FALSE	-0.587261	6.60419	-3.33998	0.00314612	0.0367027	-2.31102
TC0400012990.hg.1	DDX60L	DExD/H-box 60 like	ENSG00000181381	91351	FALSE	-0.46969	6.13241	-3.33972	0.00314803	0.0367027	-2.3116
TC0600013004.hg.1	MCM9	minichromosome maintenance 9 homologous recombination repair factor	ENSG00000111877	254394	FALSE	-0.688828	4.09261	-3.33844	0.0031574	0.0367869	-2.31447
TC1100007003.hg.1	LDHA	lactate dehydrogenase A	ENSG00000134333	3939	TRUE	0.282046	7.64417	3.33694	0.00316847	0.0368908	-2.31784
TC1000006754.hg.1	CELF2	CUGBP Elav-like family member 2	ENSG00000048740	10659	FALSE	0.221292	10.5745	3.33531	0.0031805	0.0370057	-2.32149
TC1500010072.hg.1	SIN3A	SIN3 transcription regulator family member A	ENSG00000169375	25942	FALSE	-0.22241	10.1874	-3.3331	0.0031969	0.0371703	-2.32644
TC1700011922.hg.1	LGALS3BP	galectin 3 binding protein	ENSG00000108679	3959	FALSE	-0.261879	8.8668	-3.33282	0.00319899	0.0371703	-2.32707
TC1100007049.hg.1	HTATIP2	HIV-1 Tat interactive protein 2	ENSG00000109854	10553	FALSE	-0.49679	4.33301	-3.33226	0.00320315	0.0371934	-2.32832
TC1000007024.hg.1	KIAA1217	KIAA1217	ENSG00000120549	56243	FALSE	-0.296085	7.19313	-3.33107	0.00321203	0.0372713	-2.33099
TC2000008722.hg.1	ACSS1	acyl-CoA synthetase short chain family member 1	ENSG00000154930	84532	FALSE	0.411047	5.86931	3.33043	0.00321683	0.0372811	-2.33243
TC1100009615.hg.1	VPS26B	VPS26, retromer complex component B	ENSG00000151502	112936	FALSE	0.215609	8.00992	3.33038	0.00321723	0.0372811	-2.33255
TC0200013878.hg.1	BUB1	BUB1 mitotic checkpoint serine/threonine kinase	ENSG00000169679	699	FALSE	-0.240694	7.53653	-3.32942	0.0032244	0.037339	-2.33469
TC1100006812.hg.1	ZNF143	zinc finger protein 143	ENSG00000166478	7702	FALSE	0.338593	8.81476	3.32837	0.00323232	0.0374053	-2.33705
TC0700009061.hg.1	CALU	calumenin	ENSG00000128595	813	FALSE	-0.21193	10.7131	-3.32595	0.00325057	0.037584	-2.34247
TC0700012883.hg.1	FAM131B	family with sequence similarity 131 member B	ENSG00000159784	9715	FALSE	0.406836	6.89886	3.3257	0.00325243	0.037584	-2.34302
TC0300013360.hg.1	ABCC5	ATP binding cassette subfamily C member 5	ENSG00000114770	10057	FALSE	0.340422	6.46127	3.32545	0.00325434	0.037584	-2.34359
TC0500009039.hg.1	FBXO38	F-box protein 38	ENSG00000145868	81545	FALSE	0.327487	6.89613	3.32501	0.0032577	0.0375974	-2.34458
TC0100015761.hg.1	CERS2	ceramide synthase 2	ENSG00000143418	29956	FALSE	-0.286811	8.45704	-3.32363	0.0032682	0.0376932	-2.34768
TC1700012371.hg.1	ZNF286B	zinc finger protein 286B (pseudogene)	ENSG00000249459	729288	TRUE	0.306398	7.1779	3.32267	0.00327548	0.0377518	-2.34982
TC1200009235.hg.1	MTRFR	mitochondrial translation release factor in rescue	ENSG00000130921	91574	FALSE	0.234023	8.4482	3.32237	0.00327777	0.0377528	-2.3505
TC1700007254.hg.1	DHRS7B	dehydrogenase/reductase 7B	ENSG00000109016	25979	FALSE	-0.220032	7.61867	-3.32131	0.00328585	0.0378204	-2.35286
TC0100018390.hg.1	SLC35E2A	solute carrier family 35 member E2A	ENSG00000215790	9906	FALSE	0.245444	9.37188	3.32015	0.0032947	0.0378968	-2.35546
TC0300013828.hg.1	RBM6	RNA binding motif protein 6	ENSG00000004534	10180	FALSE	0.181314	10.1503	3.31961	0.00329885	0.0378971	-2.35667
TC1900007382.hg.1	PGPEP1	pyroglutamyl-peptidase I	ENSG00000130517	54858	FALSE	-0.247285	7.34942	-3.31944	0.00330022	0.0378971	-2.35707
TC0800012454.hg.1	ZHX1	zinc fingers and homeoboxes 1	ENSG00000165156	11244	FALSE	0.222796	7.97501	3.31929	0.00330137	0.0378971	-2.3574
TC0800007004.hg.1	RHOBTB2	Rho related BTB domain containing 2	ENSG00000008853	23221	FALSE	0.242411	9.40347	3.3173	0.00331667	0.0380473	-2.36185
TC0800010630.hg.1	GGH	gamma-glutamyl hydrolase	ENSG00000137563	8836	FALSE	-0.275399	9.2073	-3.31467	0.00333701	0.038255	-2.36774
TC2000009448.hg.1	KCNG1	potassium voltage-gated channel modifier subfamily G member 1	ENSG00000026559	3755	FALSE	0.534421	4.64586	3.31231	0.00335536	0.0384397	-2.37302
TC0500008157.hg.1	LNPEP	leucyl and cystinyl aminopeptidase	ENSG00000113441	4012	FALSE	-0.295875	8.04857	-3.31166	0.0033605	0.0384728	-2.37449
TC1900010073.hg.1	LPAR2	lysophosphatidic acid receptor 2	ENSG00000064547	9170	FALSE	0.353738	7.19698	3.3108	0.0033672	0.0384997	-2.3764
TC1200008734.hg.1	RIC8B	RIC8 guanine nucleotide exchange factor B	ENSG00000111785	55188	FALSE	0.208416	7.66131	3.31078	0.00336735	0.0384997	-2.37645
TC1200008028.hg.1	MSRB3	methionine sulfoxide reductase B3	ENSG00000174099	253827	FALSE	-0.320468	6.21722	-3.31	0.0033735	0.0385443	-2.3782
TC1100007899.hg.1	PLAAT4	phospholipase A and acyltransferase 4	ENSG00000133321	5920	FALSE	-0.219896	10.4519	-3.30889	0.00338215	0.03859	-2.38067
TC1200012578.hg.1	KCNA6	potassium voltage-gated channel subfamily A member 6	ENSG00000151079	3742	FALSE	0.418927	5.76741	3.30875	0.00338327	0.03859	-2.38099
TC0300009974.hg.1	MUC20	mucin 20, cell surface associated	ENSG00000176945	200958	TRUE	0.365389	6.41663	3.30863	0.00338426	0.03859	-2.38127
TC1700010518.hg.1	GPR179	G protein-coupled receptor 179	ENSG00000277399	440435	TRUE	0.484443	4.44156	3.30816	0.00338794	0.0385901	-2.38231
TC0600008183.hg.1	CD2AP	CD2 associated protein	ENSG00000198087	23607	FALSE	-0.268168	7.95548	-3.30805	0.00338877	0.0385901	-2.38255
TC1400009410.hg.1	ZBTB25	zinc finger and BTB domain containing 25	ENSG00000089775	7597	FALSE	0.280289	7.76378	3.30489	0.00341377	0.0388328	-2.38962
TC1300008602.hg.1	MAB21L1	mab-21 like 1	ENSG00000180660	4081	FALSE	0.36571	6.73032	3.30478	0.00341462	0.0388328	-2.38986
TC1600009512.hg.1	NTAN1	N-terminal asparagine amidase	ENSG00000157045	123803	TRUE	-0.24569	7.53072	-3.30392	0.00342153	0.0388855	-2.39181
TC1700008028.hg.1	NMT1	N-myristoyltransferase 1	ENSG00000136448	4836	FALSE	-0.221345	8.12696	-3.30348	0.00342503	0.0388995	-2.39279
TC0700007065.hg.1	PLEKHA8	pleckstrin homology domain containing A8	ENSG00000106086	84725	FALSE	0.340951	6.92911	3.30269	0.0034313	0.0389449	-2.39455
TC1900011752.hg.1	ZNF223	zinc finger protein 223	ENSG00000178386	7766	FALSE	0.372712	6.79655	3.30192	0.00343744	0.0389887	-2.39627
TC0400012917.hg.1	ARAP2	ArfGAP with RhoGAP domain, ankyrin repeat and PH domain 2	ENSG00000047365	116984	FALSE	0.337574	8.42494	3.30089	0.00344565	0.039056	-2.39856
TC1100009689.hg.1	DEAF1	DEAF1 transcription factor	ENSG00000177030	10522	TRUE	0.28314	7.4543	3.29979	0.00345446	0.03913	-2.40102
TC1200010252.hg.1	TMTC1	transmembrane O-mannosyltransferase targeting cadherins 1	ENSG00000133687	83857	FALSE	-0.275212	8.5238	-3.29829	0.00346656	0.039241	-2.40438
TC0700008293.hg.1	STEAP2	STEAP2 metalloreductase	ENSG00000157214	261729	FALSE	0.57076	4.57811	3.29633	0.00348235	0.0393938	-2.40876
TC2200007547.hg.1	TSPO	translocator protein	ENSG00000100300	706	FALSE	-0.20431	8.85665	-3.29532	0.00349057	0.0394607	-2.41102
TC0100015867.hg.1	S100A3	S100 calcium binding protein A3	ENSG00000188015	6274	FALSE	-0.609651	5.27268	-3.29399	0.00350139	0.0395569	-2.414
TC1700010856.hg.1	C1QL1	complement C1q like 1	ENSG00000131094	10882	FALSE	-0.20014	10.5538	-3.29337	0.00350642	0.0395877	-2.41538
TC0700010621.hg.1	FKBP14	FKBP prolyl isomerase 14	ENSG00000106080	55033	FALSE	-0.242215	6.96576	-3.29302	0.0035093	0.039594	-2.41617
TC2200006577.hg.1	DGCR5	DiGeorge syndrome critical region gene 5	ENSG00000273032	26220	FALSE	0.327292	6.97284	3.29255	0.00351311	0.0396109	-2.41721
TC0300011852.hg.1	IMPG2	interphotoreceptor matrix proteoglycan 2	ENSG00000081148	50939	FALSE	0.581501	4.35171	3.29194	0.00351806	0.0396279	-2.41857
TC1100009279.hg.1	OAF	out at first homolog	ENSG00000184232	220323	FALSE	-0.280428	7.02929	-3.29152	0.00352151	0.0396279	-2.41951
TC0900010482.hg.1	GNA14	G protein subunit alpha 14	ENSG00000156049	9630	FALSE	-0.472608	4.42998	-3.29152	0.00352155	0.0396279	-2.41952
TC0100013153.hg.1	TMCO4	transmembrane and coiled-coil domains 4	ENSG00000162542	255104	FALSE	-0.553399	5.29374	-3.2901	0.00353313	0.039732	-2.42268
TC0700008519.hg.1	ZSCAN21	zinc finger and SCAN domain containing 21	ENSG00000166529	7589	FALSE	0.25832	7.51018	3.28884	0.00354355	0.0398231	-2.42551
TC1100010925.hg.1	OR9I1	olfactory receptor family 9 subfamily I member 1	ENSG00000172377	219954	FALSE	0.649749	3.6908	3.28756	0.00355406	0.0398995	-2.42836
TC0100007832.hg.1	ZC3H12A	zinc finger CCCH-type containing 12A	ENSG00000163874	80149	TRUE	-0.485872	5.33508	-3.28745	0.00355501	0.0398995	-2.42861
TC0400007938.hg.1	BMP2K	BMP2 inducible kinase	ENSG00000138756	55589	FALSE	0.205332	9.1695	3.28697	0.00355896	0.0399176	-2.42968
TC0400007456.hg.1	ZAR1	zygote arrest 1	ENSG00000182223	326340	FALSE	0.401351	5.45365	3.28378	0.00358542	0.0401881	-2.4368
TC0600012544.hg.1	RRAGD	Ras related GTP binding D	ENSG00000025039	58528	FALSE	0.3806	8.53026	3.28184	0.00360163	0.0403434	-2.44114
TC1600007186.hg.1	MOSMO	modulator of smoothened	ENSG00000185716	730094	TRUE	0.284434	7.51811	3.28079	0.00361038	0.0404151	-2.44347
TC0800012470.hg.1	TMEM71	transmembrane protein 71	ENSG00000165071	137835	FALSE	0.395906	4.66376	3.27942	0.00362187	0.0405171	-2.44653
TC0400011579.hg.1	PLA2G12A	phospholipase A2 group XIIA	ENSG00000123739	81579	FALSE	-0.231182	6.68769	-3.2777	0.00363638	0.0406529	-2.45037
TC1700011038.hg.1	ZNF652	zinc finger protein 652	ENSG00000198740	22834	FALSE	0.236756	8.24866	3.27597	0.00365101	0.0407898	-2.45423
TC2000006813.hg.1	MGME1	mitochondrial genome maintenance exonuclease 1	ENSG00000125871	92667	FALSE	-0.280344	8.25209	-3.27519	0.00365766	0.0408375	-2.45598
TC1200011773.hg.1	APPL2	adaptor protein, phosphotyrosine interacting with PH domain and leucine zipper 2	ENSG00000136044	55198	FALSE	0.341907	7.56712	3.2746	0.00366263	0.0408468	-2.45728
TC0700010501.hg.1	GSDME	gasdermin E	ENSG00000105928	1687	FALSE	-0.504156	5.54335	-3.27453	0.00366326	0.0408468	-2.45745
TC0700007334.hg.1	MRPL32	mitochondrial ribosomal protein L32	ENSG00000106591	64983	FALSE	-0.209489	8.93939	-3.27337	0.00367312	0.0409064	-2.46003
TC0100018507.hg.1	ARHGEF2	Rho/Rac guanine nucleotide exchange factor 2	ENSG00000116584	9181	FALSE	0.23593	8.28933	3.27334	0.00367338	0.0409064	-2.4601
TC1700008539.hg.1	MRC2	mannose receptor C type 2	ENSG00000011028	9902	FALSE	-0.184689	10.9963	-3.26999	0.003702	0.0411909	-2.46756
TC0100010331.hg.1	KLHDC9	kelch domain containing 9	ENSG00000162755	126823	FALSE	0.363509	6.74171	3.26979	0.00370374	0.0411909	-2.46801
TC1100010688.hg.1	PHF21A	PHD finger protein 21A	ENSG00000135365	51317	FALSE	0.254344	9.77675	3.26729	0.00372526	0.0414033	-2.47358
TC0800012168.hg.1	NRBP2	nuclear receptor binding protein 2	ENSG00000185189	340371	TRUE	0.213637	8.82812	3.26682	0.00372937	0.0414221	-2.47464
TC0500008941.hg.1	ARHGAP26	Rho GTPase activating protein 26	ENSG00000145819	23092	FALSE	0.365378	7.12343	3.26401	0.00375377	0.0416661	-2.4809
TC0900010661.hg.1	CDK20	cyclin dependent kinase 20	ENSG00000156345	23552	FALSE	0.233179	8.09639	3.26361	0.00375725	0.0416777	-2.48179
TC0200013019.hg.1	MCEE	methylmalonyl-CoA epimerase	ENSG00000124370	84693	FALSE	-0.474272	5.21484	-3.26259	0.00376617	0.0417496	-2.48407
TC1200009796.hg.1	SLC2A14	solute carrier family 2 member 14	ENSG00000173262	144195	FALSE	-0.411657	6.48381	-3.25812	0.00380541	0.0421573	-2.49403
TC1800006484.hg.1	NDC80	NDC80 kinetochore complex component	ENSG00000080986	10403	FALSE	-0.347302	7.08612	-3.25755	0.00381042	0.0421856	-2.49529
TC1700012027.hg.1	TEPSIN	TEPSIN adaptor related protein complex 4 accessory protein	ENSG00000167302	146705	FALSE	0.351299	6.48841	3.25542	0.00382929	0.042367	-2.50003
TC1500009981.hg.1	HCN4	hyperpolarization activated cyclic nucleotide gated potassium channel 4	ENSG00000138622	10021	FALSE	0.532003	4.50695	3.25332	0.003848	0.0425359	-2.50472
TC2200009234.hg.1	SPECC1L-ADORA2A	SPECC1L-ADORA2A readthrough (NMD candidate)	ENSG00000258555	101730217	FALSE	0.425824	5.68449	3.25313	0.00384967	0.0425359	-2.50513
TC0400010166.hg.1	FAM184B	family with sequence similarity 184 member B	ENSG00000047662	27146	FALSE	-0.364537	6.3185	-3.25287	0.003852	0.0425359	-2.50571
TC1100006796.hg.1	AKIP1	A-kinase interacting protein 1	ENSG00000166452	56672	FALSE	-0.259052	7.14768	-3.2513	0.00386602	0.0426632	-2.5092
TC0100007403.hg.1	MACO1	macoilin 1	ENSG00000204178	55219	FALSE	0.243496	7.85728	3.24942	0.00388291	0.042822	-2.51339
TC1000008579.hg.1	UBTD1	ubiquitin domain containing 1	ENSG00000165886	80019	FALSE	-0.261013	7.55736	-3.24819	0.00389402	0.0429145	-2.51613
TC0200013265.hg.1	CAPG	capping actin protein, gelsolin like	ENSG00000042493	822	FALSE	0.346527	5.97526	3.24793	0.0038963	0.0429145	-2.5167
TC0200014597.hg.1	RND3	Rho family GTPase 3	ENSG00000115963	390	FALSE	0.213277	9.251	3.24735	0.00390157	0.0429394	-2.51799
TC0800007086.hg.1	DPYSL2	dihydropyrimidinase like 2	ENSG00000092964	1808	FALSE	0.166495	11.4059	3.24713	0.00390358	0.0429394	-2.51849
TC0900009114.hg.1	RXRA	retinoid X receptor alpha	ENSG00000186350	6256	TRUE	0.255565	7.68141	3.24655	0.00390881	0.0429693	-2.51977
TC0500012392.hg.1	SPINK1	serine peptidase inhibitor Kazal type 1	ENSG00000164266	6690	FALSE	-0.600679	4.13855	-3.24544	0.00391884	0.0429839	-2.52223
TC0300013978.hg.1	USP4	ubiquitin specific peptidase 4	ENSG00000114316	7375	FALSE	0.266633	8.56908	3.24544	0.00391885	0.0429839	-2.52224
TC0X00007230.hg.1	GAGE2D	G antigen 2D	ENSG00000189064	729408	TRUE	0.36487	4.09481	3.24519	0.00392115	0.0429839	-2.5228
TC1900010715.hg.1	NUMBL	NUMB like endocytic adaptor protein	ENSG00000105245	9253	FALSE	-0.348723	6.96841	-3.24504	0.00392254	0.0429839	-2.52314
TC0800007330.hg.1	DDHD2	DDHD domain containing 2	ENSG00000085788	23259	FALSE	0.51958	6.05446	3.24494	0.00392341	0.0429839	-2.52335
TC1900009198.hg.1	BTBD2	BTB domain containing 2	ENSG00000133243	55643	FALSE	0.214333	8.33634	3.24474	0.0039252	0.0429839	-2.52379
TC1900007957.hg.1	ZNF568	zinc finger protein 568	ENSG00000198453	374900	FALSE	0.288563	7.03553	3.24224	0.00394799	0.0432059	-2.52935
TC0400007231.hg.1	NWD2	NACHT and WD repeat domain containing 2	ENSG00000174145	57495	FALSE	0.586913	5.49239	3.24085	0.00396075	0.0433178	-2.53244
TC0700009222.hg.1	LRGUK	leucine rich repeats and guanylate kinase domain containing	ENSG00000155530	136332	FALSE	0.496388	5.61988	3.24025	0.00396626	0.0433308	-2.53378
TC2200008465.hg.1	SELENOM	selenoprotein M	ENSG00000198832	140606	FALSE	-0.534434	4.78536	-3.24017	0.00396699	0.0433308	-2.53396
TC0900009273.hg.1	RNF224	ring finger protein 224	ENSG00000233198	643596	FALSE	0.270155	5.27885	3.23872	0.0039804	0.0434495	-2.5372
TC1200007615.hg.1	DIP2B	disco interacting protein 2 homolog B	ENSG00000066084	57609	FALSE	0.173402	10.6232	3.23724	0.00399406	0.0434987	-2.54048
TC0700010671.hg.1	PDE1C	phosphodiesterase 1C	ENSG00000154678	5137	FALSE	0.163597	9.99881	3.23714	0.00399495	0.0434987	-2.5407
TC1500009223.hg.1	PPIP5K1	diphosphoinositol pentakisphosphate kinase 1	ENSG00000168781	9677	FALSE	0.374924	6.11224	3.23702	0.00399603	0.0434987	-2.54096
TC0100007940.hg.1	CAP1	cyclase associated actin cytoskeleton regulatory protein 1	ENSG00000131236	10487	FALSE	-0.251371	10.2634	-3.23696	0.00399657	0.0434987	-2.54109
TC0700011968.hg.1	ZNF3	zinc finger protein 3	ENSG00000166526	7551	FALSE	0.25012	8.69373	3.23665	0.00399944	0.0434987	-2.54178
TC0600014111.hg.1	SYNGAP1	synaptic Ras GTPase activating protein 1	ENSG00000197283	8831	TRUE	0.186562	9.18529	3.23658	0.00400014	0.0434987	-2.54194
TC2200008706.hg.1	FAM227A	family with sequence similarity 227 member A	ENSG00000184949	646851	FALSE	0.299855	6.54292	3.23171	0.00404546	0.0439636	-2.55276
TC0500006737.hg.1	MARCHF6	membrane associated ring-CH-type finger 6	ENSG00000145495	10299	FALSE	0.214122	10.1467	3.23104	0.0040518	0.0440046	-2.55426
TC0100015985.hg.1	MEX3A	mex-3 RNA binding family member A	ENSG00000254726	92312	FALSE	0.269414	7.30097	3.23005	0.00406109	0.0440775	-2.55646
TC1400009524.hg.1	ZFP36L1	ZFP36 ring finger protein like 1	ENSG00000185650	677	FALSE	0.195839	9.41171	3.22795	0.00408087	0.0442642	-2.56112
TC1900011452.hg.1	PTPRH	protein tyrosine phosphatase receptor type H	ENSG00000080031	5794	FALSE	-0.349026	5.56197	-3.22598	0.00409947	0.0444378	-2.56548
TC1700009376.hg.1	MYO1C	myosin IC	ENSG00000197879	4641	FALSE	-0.298269	7.12359	-3.2254	0.00410499	0.0444694	-2.56677
TC0900009579.hg.1	ZDHHC21	zinc finger DHHC-type palmitoyltransferase 21	ENSG00000175893	340481	FALSE	0.193408	8.95296	3.22504	0.00410842	0.0444784	-2.56757
TC1600007806.hg.1	HEATR3	HEAT repeat containing 3	ENSG00000155393	55027	FALSE	-0.333844	7.66377	-3.2233	0.00412504	0.0446302	-2.57145
TC0300012812.hg.1	GPR171	G protein-coupled receptor 171	ENSG00000174946	29909	FALSE	0.550191	4.1515	3.22292	0.00412858	0.0446403	-2.57227
TC0600010017.hg.1	TMEM181	transmembrane protein 181	ENSG00000146433	57583	FALSE	0.434716	8.48204	3.22154	0.00414186	0.0447505	-2.57535
TC0100009913.hg.1	ADAMTSL4	ADAMTS like 4	ENSG00000143382	54507	FALSE	-0.423284	5.73163	-3.22131	0.004144	0.0447505	-2.57584
TC0300014031.hg.1	CCDC80	coiled-coil domain containing 80	ENSG00000091986	151887	FALSE	-0.222844	9.30713	-3.22094	0.00414763	0.0447614	-2.57668
TC1900011951.hg.1	ZNF780B	zinc finger protein 780B	ENSG00000128000	163131	TRUE	0.315886	6.58148	3.22016	0.00415507	0.0447917	-2.5784
TC0200015506.hg.1	INO80D	INO80 complex subunit D	ENSG00000114933	54891	TRUE	0.300617	7.36705	3.2201	0.00415566	0.0447917	-2.57854
TC0200007399.hg.1	PLEKHH2	pleckstrin homology, MyTH4 and FERM domain containing H2	ENSG00000152527	130271	FALSE	0.630683	5.21964	3.21931	0.00416323	0.044845	-2.58028
TC0100018388.hg.1	SLC35E2B	solute carrier family 35 member E2B	ENSG00000189339	728661	FALSE	0.256992	9.16426	3.2179	0.00417689	0.0449639	-2.58343
TC0700008690.hg.1	KMT2E	lysine methyltransferase 2E (inactive)	ENSG00000005483	55904	FALSE	0.283116	9.42142	3.2153	0.00420204	0.0452062	-2.58919
TC0200012074.hg.1	EIF2B4	eukaryotic translation initiation factor 2B subunit delta	ENSG00000115211	8890	FALSE	0.260277	7.69986	3.21338	0.00422072	0.0453787	-2.59344
TC1200010838.hg.1	ZNF385A	zinc finger protein 385A	ENSG00000161642	25946	FALSE	0.332578	6.74639	3.21309	0.00422358	0.045381	-2.59409
TC0900011955.hg.1	CAMSAP1	calmodulin regulated spectrin associated protein 1	ENSG00000130559	157922	FALSE	0.213352	8.35764	3.21228	0.00423153	0.0454379	-2.59589
TC2100007402.hg.1	ADARB1	adenosine deaminase RNA specific B1	ENSG00000197381	104	FALSE	-0.351773	6.2369	-3.21146	0.00423948	0.0454948	-2.59769
TC0500010788.hg.1	IL6ST	interleukin 6 cytokine family signal transducer	ENSG00000134352	3572	FALSE	-0.215262	9.27958	-3.21081	0.00424591	0.0455352	-2.59915
TC1200012764.hg.1	PRH1	proline rich protein HaeIII subfamily 1	ENSG00000231887	5554	TRUE	0.212599	8.00183	3.20917	0.00426203	0.0456795	-2.60278
TC0400006517.hg.1	UVSSA	UV stimulated scaffold protein A	ENSG00000163945	57654	FALSE	0.354515	5.14769	3.20747	0.00427876	0.0458293	-2.60653
TC1000011892.hg.1	CCDC186	coiled-coil domain containing 186	ENSG00000165813	55088	TRUE	0.330714	6.14866	3.20719	0.00428155	0.0458293	-2.60716
TC0200016332.hg.1	KIF1A	kinesin family member 1A	ENSG00000130294	547	FALSE	0.211518	8.11935	3.20694	0.00428403	0.0458293	-2.60771
TC2000009916.hg.1	TGIF2-RAB5IF	TGIF2-RAB5IF readthrough	ENSG00000259399	100527943	FALSE	-0.154163	10.0937	-3.20534	0.0042999	0.0459703	-2.61126
TC0200014907.hg.1	SLC25A12	solute carrier family 25 member 12	ENSG00000115840	8604	FALSE	0.424569	7.20739	3.20451	0.00430821	0.0460304	-2.61311
TC0100018323.hg.1	IER5	immediate early response 5	ENSG00000162783	51278	FALSE	0.321398	7.0633	3.20259	0.00432731	0.0462056	-2.61735
TC1000008684.hg.1	BTRC	beta-transducin repeat containing E3 ubiquitin protein ligase	ENSG00000166167	8945	FALSE	0.200737	7.91727	3.20221	0.00433111	0.0462082	-2.61819
TC0700008003.hg.1	CLIP2	CAP-Gly domain containing linker protein 2	ENSG00000106665	7461	FALSE	0.217781	8.35644	3.20186	0.00433465	0.0462082	-2.61897
TC0300012048.hg.1	ZBTB20	zinc finger and BTB domain containing 20	ENSG00000181722	26137	TRUE	0.261622	9.77716	3.20176	0.00433564	0.0462082	-2.61919
TC0X00010643.hg.1	SEPTIN6	septin 6	ENSG00000125354	23157	FALSE	-0.2864	7.95288	-3.20145	0.00433876	0.0462126	-2.61988
TC0X00010169.hg.1	BRWD3	bromodomain and WD repeat domain containing 3	ENSG00000165288	254065	FALSE	0.361926	7.62972	3.20084	0.00434487	0.0462464	-2.62123
TC0200009680.hg.1	FMNL2	formin like 2	ENSG00000157827	114793	FALSE	-0.291797	7.63127	-3.20059	0.00434733	0.0462464	-2.62177
TC0400012798.hg.1	ADGRL3	adhesion G protein-coupled receptor L3	ENSG00000150471	23284	FALSE	0.473109	5.76751	3.20018	0.00435149	0.046262	-2.62269
TC0800006819.hg.1	C8orf48	chromosome 8 open reading frame 48	ENSG00000164743	157773	FALSE	-0.456124	4.28485	-3.19933	0.00436002	0.0463239	-2.62457
TC0600008757.hg.1	PNRC1	proline rich nuclear receptor coactivator 1	ENSG00000146278	10957	FALSE	0.22797	9.12601	3.19782	0.00437527	0.0464571	-2.62791
TC0100015990.hg.1	PAQR6	progestin and adipoQ receptor family member 6	ENSG00000160781	79957	FALSE	0.281094	6.89982	3.1968	0.0043856	0.0465379	-2.63017
TC2000008253.hg.1	ADRA1D	adrenoceptor alpha 1D	ENSG00000171873	146	FALSE	-0.394289	5.71499	-3.1959	0.00439471	0.0466057	-2.63216
TC1900006977.hg.1	ICAM1	intercellular adhesion molecule 1	ENSG00000090339	3383	FALSE	-0.225323	6.96298	-3.19489	0.00440497	0.0466856	-2.6344
TC0100016963.hg.1	KDM5B	lysine demethylase 5B	ENSG00000117139	10765	FALSE	0.231984	9.31065	3.19428	0.00441116	0.0467223	-2.63574
TC0500008229.hg.1	PAM	peptidylglycine alpha-amidating monooxygenase	ENSG00000145730	5066	FALSE	-0.330092	8.63462	-3.19217	0.0044327	0.0469025	-2.64041
TC1100010123.hg.1	DKK3	dickkopf WNT signaling pathway inhibitor 3	ENSG00000050165	27122	FALSE	-0.175649	10.576	-3.19208	0.00443365	0.0469025	-2.64062
TC0100008017.hg.1	RIMKLA	ribosomal modification protein rimK like family member A	ENSG00000177181	284716	FALSE	0.415851	5.69691	3.19015	0.0044535	0.0470722	-2.6449
TC0100014543.hg.1	DEPDC1	DEP domain containing 1	ENSG00000024526	55635	FALSE	-0.2945	7.92833	-3.18998	0.00445519	0.0470722	-2.64526
TC1100012308.hg.1	CRYAB	crystallin alpha B	ENSG00000109846	1410	FALSE	-0.21244	10.4995	-3.1893	0.00446218	0.047117	-2.64676
TC1100011052.hg.1	FADS3	fatty acid desaturase 3	ENSG00000221968	3995	FALSE	-0.273015	7.81976	-3.18881	0.00446725	0.0471387	-2.64785
TC1700012296.hg.1	PRKAR1A	protein kinase cAMP-dependent type I regulatory subunit alpha	ENSG00000108946	5573	FALSE	0.279409	8.89648	3.18857	0.00446974	0.0471387	-2.64838
TC0900011669.hg.1	SH3GLB2	SH3 domain containing GRB2 like, endophilin B2	ENSG00000148341	56904	FALSE	0.233527	7.85786	3.18824	0.00447317	0.0471458	-2.64912
TC0300013884.hg.1	DIPK2A	divergent protein kinase domain 2A	ENSG00000181744	205428	FALSE	0.232453	9.60029	3.18743	0.00448147	0.047202	-2.6509
TC0600010520.hg.1	MYLK4	myosin light chain kinase family member 4	ENSG00000145949	340156	FALSE	0.399075	4.66506	3.18719	0.00448401	0.047202	-2.65144
TC1400006828.hg.1	COCH	cochlin	ENSG00000100473	1690	FALSE	-0.449807	4.09456	-3.18605	0.00449584	0.0472855	-2.65396
TC2200006607.hg.1	CDC45	cell division cycle 45	ENSG00000093009	8318	FALSE	-0.264683	6.8647	-3.18589	0.00449746	0.0472855	-2.65431
TC1900006480.hg.1	PALM	paralemmin	ENSG00000099864	5064	FALSE	0.216754	7.70789	3.18433	0.00451365	0.0474266	-2.65775
TC0500012965.hg.1	LMAN2	lectin, mannose binding 2	ENSG00000169223	10960	FALSE	-0.167982	10.6521	-3.18377	0.00451959	0.0474599	-2.65901
TC0500007641.hg.1	PIK3R1	phosphoinositide-3-kinase regulatory subunit 1	ENSG00000145675	5295	FALSE	0.336888	6.80756	3.18296	0.00452799	0.047519	-2.66079
TC0400009064.hg.1	FGB	fibrinogen beta chain	ENSG00000171564	2244	FALSE	0.465009	4.89141	3.18253	0.00453254	0.0475375	-2.66175
TC0400007344.hg.1	UCHL1	ubiquitin C-terminal hydrolase L1	ENSG00000154277	7345	FALSE	-0.157133	10.7896	-3.1816	0.00454225	0.0476102	-2.6638
TC0X00008026.hg.1	H2BW2	H2B.W histone 2	ENSG00000101812	286436	FALSE	0.278429	6.55006	3.1808	0.00455063	0.0476618	-2.66556
TC0200009270.hg.1	RAB6C	RAB6C, member RAS oncogene family	ENSG00000222014	84084	FALSE	-0.280676	5.77777	-3.1806	0.00455273	0.0476618	-2.66601
TC0300008289.hg.1	DZIP3	DAZ interacting zinc finger protein 3	ENSG00000198919	9666	FALSE	0.466777	5.91548	3.17935	0.00456583	0.0477223	-2.66876
TC0800007269.hg.1	UNC5D	unc-5 netrin receptor D	ENSG00000156687	137970	FALSE	-0.324142	5.73324	-3.1793	0.00456643	0.0477223	-2.66888
TC2000007343.hg.1	DHX35	DEAH-box helicase 35	ENSG00000101452	60625	FALSE	0.25248	6.05971	3.17914	0.00456807	0.0477223	-2.66923
TC2000008381.hg.1	JAG1	jagged canonical Notch ligand 1	ENSG00000101384	182	FALSE	-0.279251	8.92512	-3.17899	0.00456966	0.0477223	-2.66956
TC0400012565.hg.1	CLDN24	claudin 24	ENSG00000185758	100132463	FALSE	0.409309	4.21278	3.17715	0.00458909	0.047896	-2.67362
TC0200016553.hg.1	DAPL1	death associated protein like 1	ENSG00000163331	92196	FALSE	0.395744	5.12293	3.17388	0.00462381	0.0482289	-2.68084
TC1700006999.hg.1	ADORA2B	adenosine A2b receptor	ENSG00000170425	136	FALSE	-0.357662	5.79741	-3.17359	0.00462694	0.0482322	-2.68149
TC0200015194.hg.1	TFPI	tissue factor pathway inhibitor	ENSG00000003436	7035	FALSE	0.396759	4.7927	3.17242	0.00463949	0.0483336	-2.68408
TC0X00006709.hg.1	NHS	NHS actin remodeling regulator	ENSG00000188158	4810	FALSE	-0.21665	7.57723	-3.17158	0.00464843	0.0483929	-2.68593
TC0200011901.hg.1	PUM2	pumilio RNA binding family member 2	ENSG00000055917	23369	FALSE	0.299864	8.15913	3.17136	0.00465083	0.0483929	-2.68642
TC0100016902.hg.1	ASCL5	achaete-scute family bHLH transcription factor 5	ENSG00000232237	647219	FALSE	0.347842	4.83707	3.16942	0.0046716	0.0485796	-2.69069
TC1600011329.hg.1	TBC1D24	TBC1 domain family member 24	ENSG00000162065	57465	FALSE	0.214483	8.84634	3.16886	0.00467771	0.0486135	-2.69194
TC0600014268.hg.1	PRRT1	proline rich transmembrane protein 1	ENSG00000204314	80863	TRUE	0.388416	5.4068	3.16793	0.00468777	0.0486886	-2.69399
TC0600009238.hg.1	RSPH4A	radial spoke head component 4A	ENSG00000111834	345895	FALSE	0.427635	6.41994	3.16547	0.00471438	0.0489353	-2.69941
TC1500007005.hg.1	ITPKA	inositol-trisphosphate 3-kinase A	ENSG00000137825	3706	FALSE	-0.405394	5.36436	-3.16409	0.00472938	0.0490612	-2.70245
TC0200016581.hg.1	C2orf88	chromosome 2 open reading frame 88	ENSG00000187699	84281	FALSE	0.397552	5.18592	3.16073	0.00476614	0.0494126	-2.70986
TC0100016122.hg.1	IGSF8	immunoglobulin superfamily member 8	ENSG00000162729	93185	FALSE	0.253893	7.17446	3.15968	0.00477767	0.0494988	-2.71217
TC1000007471.hg.1	ALOX5	arachidonate 5-lipoxygenase	ENSG00000012779	240	TRUE	-0.404204	4.52528	-3.15945	0.00478023	0.0494988	-2.71269
TC0200014160.hg.1	BIN1	bridging integrator 1	ENSG00000136717	274	FALSE	-0.403228	6.42577	-3.15911	0.00478396	0.0495074	-2.71343
TC1900011914.hg.1	ZNF506	zinc finger protein 506	ENSG00000081665	440515	FALSE	0.277425	7.26233	3.15843	0.00479146	0.0495552	-2.71493
TC1500008328.hg.1	BLM	BLM RecQ like helicase	ENSG00000197299	641	FALSE	0.305814	7.51015	3.15802	0.00479599	0.049572	-2.71584
TC1600011047.hg.1	HSDL1	hydroxysteroid dehydrogenase like 1	ENSG00000103160	83693	FALSE	0.281254	8.1247	3.1569	0.00480836	0.0496446	-2.7183
TC1200012700.hg.1	C12orf75	chromosome 12 open reading frame 75	ENSG00000235162	387882	FALSE	-0.337274	8.58035	-3.15686	0.0048088	0.0496446	-2.71839
TC0900011388.hg.1	PHF19	PHD finger protein 19	ENSG00000119403	26147	FALSE	-0.215357	8.47128	-3.15415	0.00483894	0.0498898	-2.72437
TC2100008462.hg.1	LSS	lanosterol synthase	ENSG00000160285	4047	TRUE	0.262078	8.31534	3.15393	0.00484137	0.0498898	-2.72485
TC0X00009684.hg.1	SHROOM4	shroom family member 4	ENSG00000158352	57477	FALSE	-0.285237	6.11404	-3.15378	0.00484304	0.0498898	-2.72518
TC1600007986.hg.1	NLRC5	NLR family CARD domain containing 5	ENSG00000140853	84166	FALSE	-0.409164	6.53122	-3.15368	0.0048442	0.0498898	-2.72541
TC2000007438.hg.1	MYBL2	MYB proto-oncogene like 2	ENSG00000101057	4605	FALSE	-0.227821	7.73543	-3.15268	0.00485533	0.0499743	-2.7276
TC0700007262.hg.1	POU6F2	POU class 6 homeobox 2	ENSG00000106536	11281	FALSE	0.34614	4.89022	3.15135	0.00487022	0.0500974	-2.73053
TC0X00009569.hg.1	ZNF41	zinc finger protein 41	ENSG00000147124	7592	FALSE	0.333631	7.4386	3.14888	0.004898	0.050353	-2.73597
TC1000010699.hg.1	IPMK	inositol polyphosphate multikinase	ENSG00000151151	253430	FALSE	0.304469	7.40208	3.14761	0.00491234	0.050442	-2.73877
TC0200011731.hg.1	PDIA6	protein disulfide isomerase family A member 6	ENSG00000143870	10130	FALSE	-0.17155	10.5046	-3.14759	0.00491255	0.050442	-2.73881
TC0800009921.hg.1	KCTD9	potassium channel tetramerization domain containing 9	ENSG00000104756	54793	FALSE	-0.335444	7.38005	-3.14707	0.00491853	0.0504534	-2.73997
TC1900007410.hg.1	UPF1	UPF1 RNA helicase and ATPase	ENSG00000005007	5976	FALSE	0.28997	6.65181	3.14698	0.00491956	0.0504534	-2.74017
TC1100009403.hg.1	ROBO3	roundabout guidance receptor 3	ENSG00000154134	64221	FALSE	0.271147	7.14854	3.14617	0.0049287	0.0505101	-2.74195
TC0900007994.hg.1	PHF2	PHD finger protein 2	ENSG00000197724	5253	FALSE	0.201913	8.63685	3.14597	0.00493098	0.0505101	-2.74239
TC0300009224.hg.1	P2RY1	purinergic receptor P2Y1	ENSG00000169860	5028	FALSE	0.328626	5.50717	3.14557	0.00493555	0.0505267	-2.74328
TC1800008891.hg.1	BCL2	BCL2 apoptosis regulator	ENSG00000171791	596	FALSE	0.239177	8.69899	3.14392	0.00495432	0.0506885	-2.74691
TC0X00008521.hg.1	SLC9A6	solute carrier family 9 member A6	ENSG00000198689	10479	FALSE	0.270166	8.69469	3.14357	0.00495831	0.0506991	-2.74768
TC1200010516.hg.1	SLC38A1	solute carrier family 38 member 1	ENSG00000111371	81539	FALSE	-0.473163	7.19588	-3.14321	0.00496237	0.0507103	-2.74846
TC0100011920.hg.1	GALNT2	polypeptide N-acetylgalactosaminyltransferase 2	ENSG00000143641	2590	FALSE	-0.424832	6.577	-3.14281	0.0049669	0.0507263	-2.74933
TC1700007790.hg.1	CDC6	cell division cycle 6	ENSG00000094804	990	FALSE	-0.430861	7.44847	-3.14162	0.00498054	0.0508087	-2.75196
TC0X00009645.hg.1	GRIPAP1	GRIP1 associated protein 1	ENSG00000068400	56850	FALSE	0.330952	5.4115	3.14159	0.0049809	0.0508087	-2.75203
TC0800008028.hg.1	PKIA	cAMP-dependent protein kinase inhibitor alpha	ENSG00000171033	5569	FALSE	0.288468	8.35855	3.1407	0.00499116	0.0508831	-2.75399
TC1200011811.hg.1	MTERF2	mitochondrial transcription termination factor 2	ENSG00000120832	80298	FALSE	0.28345	7.6009	3.14007	0.00499832	0.0509258	-2.75536
TC1500006522.hg.1	GOLGA8DP	golgin A8 family member D, pseudogene	ENSG00000175676	100132979	TRUE	0.28591	3.86094	3.13774	0.00502521	0.0511693	-2.76049
TC0200009955.hg.1	CYBRD1	cytochrome b reductase 1	ENSG00000071967	79901	FALSE	-0.194466	8.06156	-3.13714	0.00503217	0.0512083	-2.76182
TC0X00009356.hg.1	TMEM47	transmembrane protein 47	ENSG00000147027	83604	FALSE	0.167371	11.0505	3.13689	0.00503502	0.0512083	-2.76236
TC0500013231.hg.1	CATSPER3	cation channel sperm associated 3	ENSG00000152705	347732	FALSE	0.356285	4.97881	3.13526	0.00505402	0.051371	-2.76596
TC1400008919.hg.1	CFL2	cofilin 2	ENSG00000165410	1073	FALSE	-0.315176	6.93673	-3.13421	0.00506624	0.0514647	-2.76827
TC0X00007965.hg.1	TCEAL2	transcription elongation factor A like 2	ENSG00000184905	140597	FALSE	0.453981	5.89772	3.13375	0.00507156	0.0514882	-2.76927
TC0200013616.hg.1	AFF3	AF4/FMR2 family member 3	ENSG00000144218	3899	FALSE	0.311817	6.77706	3.13093	0.00510452	0.0517922	-2.77546
TC1700007890.hg.1	ATP6V0A1	ATPase H+ transporting V0 subunit a1	ENSG00000033627	535	TRUE	0.171895	10.1167	3.12998	0.00511575	0.0518753	-2.77756
TC1500008086.hg.1	SAXO2	stabilizer of axonemal microtubules 2	ENSG00000188659	283726	FALSE	0.355956	7.65133	3.12931	0.00512366	0.0518974	-2.77904
TC0100017586.hg.1	C1orf35	chromosome 1 open reading frame 35	ENSG00000143793	79169	FALSE	0.205687	7.23643	3.12928	0.00512399	0.0518974	-2.7791
TC0500011497.hg.1	GLRX	glutaredoxin	ENSG00000173221	2745	FALSE	-0.296705	6.94152	-3.12875	0.00513018	0.0519294	-2.78026
TC0200009626.hg.1	LYPD6	LY6/PLAUR domain containing 6	ENSG00000187123	130574	FALSE	-0.259632	7.24424	-3.12781	0.0051413	0.0520112	-2.78233
TC0400008892.hg.1	HHIP	hedgehog interacting protein	ENSG00000164161	64399	FALSE	-0.655187	4.51545	-3.12657	0.00515597	0.0521289	-2.78505
TC0800007119.hg.1	ESCO2	establishment of sister chromatid cohesion N-acetyltransferase 2	ENSG00000171320	157570	FALSE	-0.435215	4.68572	-3.12591	0.00516384	0.0521777	-2.78651
TC0300009724.hg.1	VPS8	VPS8 subunit of CORVET complex	ENSG00000156931	23355	FALSE	0.40207	7.32154	3.12549	0.00516886	0.0521847	-2.78743
TC0300012206.hg.1	ADCY5	adenylate cyclase 5	ENSG00000173175	111	FALSE	0.267019	6.32677	3.12534	0.00517063	0.0521847	-2.78776
TC1000008582.hg.1	C10orf62	chromosome 10 open reading frame 62	ENSG00000203942	414157	FALSE	0.525275	4.22925	3.12499	0.00517479	0.0521959	-2.78853
TC0700009493.hg.1	ZYX	zyxin	ENSG00000159840	7791	TRUE	-0.194277	9.13698	-3.1244	0.00518173	0.0522351	-2.78981
TC1600011568.hg.1	TMEM231	transmembrane protein 231	ENSG00000205084	79583	FALSE	0.297642	6.93162	3.12333	0.00519453	0.0523334	-2.79217
TC1600008020.hg.1	USB1	U6 snRNA biogenesis phosphodiesterase 1	ENSG00000103005	79650	FALSE	-0.232146	7.62	-3.12273	0.0052017	0.0523748	-2.79349
TC2200007312.hg.1	LGALS1	galectin 1	ENSG00000100097	3956	FALSE	-0.162753	11.5096	-3.12082	0.00522463	0.0525747	-2.79769
TC0100015182.hg.1	TAF13	TATA-box binding protein associated factor 13	ENSG00000197780	6884	FALSE	-0.357831	8.58093	-3.11968	0.00523829	0.0526813	-2.80019
TC1700012381.hg.1	RSKR	ribosomal protein S6 kinase related	ENSG00000167524	124923	FALSE	0.434079	6.23874	3.11861	0.0052512	0.0527596	-2.80254
TC1000012011.hg.1	RGS10	regulator of G protein signaling 10	ENSG00000148908	6001	FALSE	-0.245473	8.37767	-3.1183	0.00525491	0.0527596	-2.80321
TC0900008795.hg.1	RALGPS1	Ral GEF with PH domain and SH3 binding motif 1	ENSG00000136828	9649	FALSE	0.397984	6.93362	3.11827	0.00525532	0.0527596	-2.80329
TC0900011385.hg.1	PSMD5	proteasome 26S subunit, non-ATPase 5	ENSG00000095261	5711	FALSE	-0.270977	6.72751	-3.11746	0.00526501	0.0528238	-2.80505
TC0100012454.hg.1	SDF4	stromal cell derived factor 4	ENSG00000078808	51150	FALSE	-0.239212	8.48205	-3.11723	0.00526788	0.0528238	-2.80557
TC2000008217.hg.1	SLC4A11	solute carrier family 4 member 11	ENSG00000088836	83959	FALSE	-0.370124	5.82634	-3.11588	0.00528424	0.0529568	-2.80853
TC2000008123.hg.1	NRSN2-AS1	NRSN2 antisense RNA 1	ENSG00000225377	100507459	FALSE	0.268324	7.20116	3.11543	0.00528962	0.0529797	-2.8095
TC2000008212.hg.1	LZTS3	leucine zipper tumor suppressor family member 3	ENSG00000088899	9762	FALSE	0.327818	5.50083	3.1145	0.00530103	0.053063	-2.81156
TC1100008900.hg.1	CFAP300	cilia and flagella associated protein 300	ENSG00000137691	85016	FALSE	-0.292228	5.97998	-3.11347	0.00531359	0.0531045	-2.81382
TC0100006866.hg.1	C1orf167	chromosome 1 open reading frame 167	ENSG00000215910	284498	FALSE	-0.316445	5.93875	-3.11293	0.00532008	0.0531045	-2.81499
TC0800008955.hg.1	CCN4	cellular communication network factor 4	ENSG00000104415	8840	FALSE	0.264836	5.67663	3.11284	0.00532122	0.0531045	-2.81519
TC0800010048.hg.1	PURG	purine rich element binding protein G	ENSG00000172733	29942	FALSE	0.417188	5.41304	3.11283	0.00532137	0.0531045	-2.81522
TC0500007848.hg.1	PDE8B	phosphodiesterase 8B	ENSG00000113231	8622	TRUE	-0.322212	5.99573	-3.11279	0.00532183	0.0531045	-2.8153
TC0700013371.hg.1	ZNF138	zinc finger protein 138	ENSG00000197008	7697	FALSE	0.311829	8.2249	3.1126	0.00532417	0.0531045	-2.81572
TC0100018510.hg.1	GLMP	glycosylated lysosomal membrane protein	ENSG00000198715	112770	FALSE	-0.317821	7.04197	-3.11238	0.00532688	0.0531045	-2.81621
TC0100007949.hg.1	ZMPSTE24	zinc metallopeptidase STE24	ENSG00000084073	10269	FALSE	-0.245366	7.83671	-3.11106	0.00534307	0.0532348	-2.8191
TC1300007070.hg.1	COG3	component of oligomeric golgi complex 3	ENSG00000136152	83548	FALSE	0.216779	8.32716	3.11079	0.00534636	0.0532366	-2.81969
TC1900009459.hg.1	INSR	insulin receptor	ENSG00000171105	3643	FALSE	0.374643	6.9467	3.11	0.00535603	0.053302	-2.82142
TC1800007797.hg.1	ATP9B	ATPase phospholipid transporting 9B (putative)	ENSG00000166377	374868	TRUE	0.38014	7.27857	3.10963	0.00536055	0.0533157	-2.82222
TC0100018219.hg.1	PPCS	phosphopantothenoylcysteine synthetase	ENSG00000127125	79717	FALSE	-0.359986	7.31951	-3.10938	0.00536363	0.0533157	-2.82277
TC1400008722.hg.1	ZFHX2	zinc finger homeobox 2	ENSG00000136367	85446	FALSE	0.339461	6.47854	3.10796	0.00538113	0.0534586	-2.82588
TC0900011660.hg.1	KYAT1	kynurenine aminotransferase 1	ENSG00000171097	883	TRUE	0.298516	6.62007	3.10661	0.0053979	0.0535724	-2.82885
TC1900011856.hg.1	CD320	CD320 molecule	ENSG00000167775	51293	FALSE	-0.174091	8.67763	-3.10653	0.00539884	0.0535724	-2.82902
TC0X00007310.hg.1	TSPYL2	TSPY like 2	ENSG00000184205	64061	FALSE	0.189465	8.684	3.10556	0.0054109	0.053661	-2.83115
TC1700008282.hg.1	NME1	NME/NM23 nucleoside diphosphate kinase 1	ENSG00000239672	4830	TRUE	-0.172485	10.4749	-3.10476	0.00542092	0.0537292	-2.83292
TC0200013129.hg.1	TACR1	tachykinin receptor 1	ENSG00000115353	6869	FALSE	0.347612	4.93789	3.10311	0.00544138	0.05388	-2.83652
TC0600014333.hg.1	MICAL1	microtubule associated monooxygenase, calponin and LIM domain containing 1	ENSG00000135596	64780	FALSE	0.171545	9.07398	3.10303	0.00544242	0.05388	-2.8367
TC0600008069.hg.1	KLC4	kinesin light chain 4	ENSG00000137171	89953	FALSE	0.424577	6.36102	3.10246	0.00544951	0.0538922	-2.83794
TC1400009973.hg.1	RPS6KA5	ribosomal protein S6 kinase A5	ENSG00000100784	9252	FALSE	0.498274	4.44906	3.10227	0.0054519	0.0538922	-2.83836
TC0100014228.hg.1	LRP8	LDL receptor related protein 8	ENSG00000157193	7804	FALSE	0.204804	9.1946	3.10196	0.00545576	0.0538922	-2.83903
TC0400012641.hg.1	PDLIM3	PDZ and LIM domain 3	ENSG00000154553	27295	FALSE	0.383362	5.66571	3.10192	0.00545625	0.0538922	-2.83912
TC1100012037.hg.1	MAML2	mastermind like transcriptional coactivator 2	ENSG00000184384	84441	FALSE	-0.197971	8.77257	-3.10034	0.0054761	0.054018	-2.84259
TC0700006867.hg.1	DNAH11	dynein axonemal heavy chain 11	ENSG00000105877	8701	FALSE	0.377149	5.72463	3.10034	0.0054761	0.054018	-2.84259
TC1500007851.hg.1	ARID3B	AT-rich interaction domain 3B	ENSG00000179361	10620	FALSE	0.253354	7.21574	3.09997	0.00548074	0.054018	-2.8434
TC1800008399.hg.1	B4GALT6	beta-1,4-galactosyltransferase 6	ENSG00000118276	9331	FALSE	0.526105	4.04678	3.0999	0.0054816	0.054018	-2.84355
TC0500013266.hg.1	NSG2	neuronal vesicle trafficking associated 2	ENSG00000170091	51617	FALSE	0.529399	4.31702	3.09912	0.00549147	0.0540842	-2.84526
TC2200007932.hg.1	PI4KAP1	phosphatidylinositol 4-kinase alpha pseudogene 1	ENSG00000274602	728233	FALSE	0.269754	8.64556	3.09864	0.00549758	0.0541133	-2.84633
TC0200006983.hg.1	EFR3B	EFR3 homolog B	ENSG00000084710	22979	FALSE	-0.238483	7.34948	-3.09726	0.00551498	0.0542533	-2.84934
TC1900011813.hg.1	ZNF548	zinc finger protein 548	ENSG00000188785	147694	FALSE	0.278127	7.42926	3.09671	0.00552192	0.0542904	-2.85054
TC1100013209.hg.1	PAK1	p21 (RAC1) activated kinase 1	ENSG00000149269	5058	FALSE	0.604017	5.10987	3.09506	0.00554279	0.0544643	-2.85414
TC0700012968.hg.1	PDIA4	protein disulfide isomerase family A member 4	ENSG00000155660	9601	FALSE	-0.17455	9.38094	-3.09108	0.00559363	0.054908	-2.86286
TC1700006665.hg.1	ZFP3	ZFP3 zinc finger protein	ENSG00000180787	124961	FALSE	0.361508	5.93075	3.09103	0.00559435	0.054908	-2.86298
TC1400007603.hg.1	RGS6	regulator of G protein signaling 6	ENSG00000182732	9628	FALSE	0.269923	8.00372	3.08942	0.00561505	0.0550795	-2.8665
TC1400010755.hg.1	PSMA3-AS1	PSMA3 antisense RNA 1	ENSG00000257621	379025	FALSE	0.200075	9.1971	3.08849	0.00562704	0.0551534	-2.86854
TC0400011748.hg.1	CCNA2	cyclin A2	ENSG00000145386	890	FALSE	-0.217631	8.96704	-3.08833	0.00562901	0.0551534	-2.86887
TC1900007061.hg.1	ZNF844	zinc finger protein 844	ENSG00000223547	284391	TRUE	0.260413	8.72223	3.08784	0.00563539	0.0551742	-2.86995
TC0400009935.hg.1	CCDC96	coiled-coil domain containing 96	ENSG00000173013	257236	FALSE	0.335659	6.62437	3.08767	0.00563758	0.0551742	-2.87032
TC0500013109.hg.1	ZFP62	ZFP62 zinc finger protein	ENSG00000196670	643836	FALSE	0.259898	8.01395	3.0868	0.00564881	0.0552525	-2.87222
TC0500012491.hg.1	ZNF300	zinc finger protein 300	ENSG00000145908	91975	FALSE	0.297078	7.4049	3.08389	0.00568662	0.055567	-2.87859
TC0800009637.hg.1	USP17L2	ubiquitin specific peptidase 17 like family member 2	ENSG00000223443	377630	TRUE	-0.438408	4.29214	-3.08383	0.00568745	0.055567	-2.87873
TC0300014042.hg.1	RAB43	RAB43, member RAS oncogene family	ENSG00000172780	339122	FALSE	-0.312491	7.22091	-3.08296	0.0056987	0.0556448	-2.88061
TC0100008594.hg.1	ROR1	receptor tyrosine kinase like orphan receptor 1	ENSG00000185483	4919	FALSE	0.42894	6.13443	3.08267	0.00570258	0.0556448	-2.88126
TC1100009207.hg.1	KMT2A	lysine methyltransferase 2A	ENSG00000118058	4297	FALSE	0.198425	8.88581	3.08247	0.00570516	0.0556448	-2.88169
TC0600011536.hg.1	TAPBP	TAP binding protein	ENSG00000231925	6892	TRUE	-0.194986	9.43444	-3.08191	0.00571253	0.0556778	-2.88292
TC1900011422.hg.1	LENG9	leukocyte receptor cluster member 9	ENSG00000275183	94059	TRUE	0.404153	5.13474	3.08171	0.00571504	0.0556778	-2.88334
TC1000012399.hg.1	ECHS1	enoyl-CoA hydratase, short chain 1	ENSG00000127884	1892	FALSE	-0.169461	9.39245	-3.08023	0.00573451	0.0557695	-2.88659
TC1400006853.hg.1	AKAP6	A-kinase anchoring protein 6	ENSG00000151320	9472	FALSE	0.217814	8.73303	3.08017	0.00573532	0.0557695	-2.88672
TC0700010504.hg.1	OSBPL3	oxysterol binding protein like 3	ENSG00000070882	26031	FALSE	-0.395001	6.28767	-3.08002	0.00573724	0.0557695	-2.88704
TC0Y00007074.hg.1	UTY	ubiquitously transcribed tetratricopeptide repeat containing, Y-linked	ENSG00000183878	7404	FALSE	0.37695	7.26544	3.07976	0.00574068	0.0557695	-2.88761
TC0500011157.hg.1	GCNT4	glucosaminyl (N-acetyl) transferase 4	ENSG00000176928	51301	FALSE	0.556397	5.59244	3.07976	0.00574074	0.0557695	-2.88762
TC0100007943.hg.1	RLF	RLF zinc finger	ENSG00000117000	6018	FALSE	0.242786	8.1745	3.077	0.00577713	0.0560912	-2.89365
TC1900011758.hg.1	APOE	apolipoprotein E	ENSG00000130203	348	FALSE	0.315686	8.14732	3.07651	0.0057836	0.0561216	-2.89472
TC0700010603.hg.1	TRIL	TLR4 interactor with leucine rich repeats	ENSG00000255690	9865	FALSE	0.322216	5.3123	3.07627	0.00578681	0.0561216	-2.89525
TC0300007325.hg.1	ZNF589	zinc finger protein 589	ENSG00000164048	51385	FALSE	0.259421	6.08197	3.07565	0.00579494	0.0561686	-2.89659
TC0900011872.hg.1	BRD3	bromodomain containing 3	ENSG00000169925	8019	FALSE	0.224085	8.08142	3.07445	0.00581097	0.0562194	-2.89922
TC0200014802.hg.1	SCN3A	sodium voltage-gated channel alpha subunit 3	ENSG00000153253	6328	FALSE	0.331631	6.76826	3.07434	0.00581233	0.0562194	-2.89944
TC1100011652.hg.1	GDPD5	glycerophosphodiester phosphodiesterase domain containing 5	ENSG00000158555	81544	FALSE	0.216513	9.046	3.07428	0.00581313	0.0562194	-2.89957
TC1200006457.hg.1	ERC1	ELKS/RAB6-interacting/CAST family member 1	ENSG00000082805	23085	FALSE	-0.258273	7.73658	-3.07427	0.00581331	0.0562194	-2.89961
TC1500010712.hg.1	GOLGA8N	golgin A8 family member N	ENSG00000232653	643699	TRUE	0.343426	7.90598	3.07381	0.00581943	0.0562396	-2.90061
TC2000009903.hg.1	HM13	histocompatibility minor 13	ENSG00000101294	81502	TRUE	-0.208995	9.69017	-3.07362	0.00582196	0.0562396	-2.90102
TC0700013050.hg.1	KCNH2	potassium voltage-gated channel subfamily H member 2	ENSG00000055118	3757	FALSE	0.296872	7.72945	3.07318	0.00582786	0.0562631	-2.90199
TC0600007500.hg.1	HCG9	HLA complex group 9	ENSG00000204625	10255	TRUE	0.317335	5.23208	3.07286	0.00583217	0.0562631	-2.90269
TC1900008143.hg.1	AXL	AXL receptor tyrosine kinase	ENSG00000167601	558	FALSE	-0.353529	7.25101	-3.07236	0.0058388	0.0562631	-2.90378
TC0600009353.hg.1	TPD52L1	TPD52 like 1	ENSG00000111907	7164	FALSE	-0.426469	5.44677	-3.07178	0.0058466	0.0562631	-2.90505
TC0200014004.hg.1	CCDC93	coiled-coil domain containing 93	ENSG00000125633	54520	FALSE	0.259932	8.07562	3.07175	0.00584698	0.0562631	-2.90511
TC0200011413.hg.1	BOK	BCL2 family apoptosis regulator BOK	ENSG00000176720	666	FALSE	-0.218942	7.40324	-3.07141	0.00585154	0.0562631	-2.90586
TC1900009984.hg.1	UNC13A	unc-13 homolog A	ENSG00000130477	23025	FALSE	0.515956	5.21124	3.07126	0.00585346	0.0562631	-2.90617
TC1900011658.hg.1	TRAPPC5	trafficking protein particle complex subunit 5	ENSG00000181029	126003	FALSE	-0.202831	8.55991	-3.07118	0.00585463	0.0562631	-2.90636
TC0100017612.hg.1	TRIM11	tripartite motif containing 11	ENSG00000154370	81559	TRUE	0.363318	6.04812	3.07102	0.00585672	0.0562631	-2.9067
TC0200007825.hg.1	CEP68	centrosomal protein 68	ENSG00000011523	23177	FALSE	0.240886	8.94327	3.07098	0.00585725	0.0562631	-2.90679
TC1400008056.hg.1	IFI27	interferon alpha inducible protein 27	ENSG00000165949	3429	TRUE	-0.36343	5.86468	-3.07071	0.00586085	0.0562662	-2.90737
TC0100015288.hg.1	KCND3	potassium voltage-gated channel subfamily D member 3	ENSG00000171385	3752	FALSE	0.190031	9.79536	3.07018	0.00586808	0.056304	-2.90855
TC1200011420.hg.1	SLC6A15	solute carrier family 6 member 15	ENSG00000072041	55117	FALSE	-0.40069	4.69949	-3.06879	0.00588675	0.0564372	-2.91158
TC0600012358.hg.1	PHIP	pleckstrin homology domain interacting protein	ENSG00000146247	55023	FALSE	0.330335	8.18603	3.06865	0.00588866	0.0564372	-2.91188
TC1000008731.hg.1	C10orf95-AS1	C10orf95 antisense RNA 1	ENSG00000269609	100505761	FALSE	0.345673	7.05521	3.0683	0.00589337	0.0564372	-2.91265
TC0100012846.hg.1	DFFA	DNA fragmentation factor subunit alpha	ENSG00000160049	1676	FALSE	-0.213743	7.3537	-3.06813	0.00589561	0.0564372	-2.91301
TC1400009922.hg.1	PTPN21	protein tyrosine phosphatase non-receptor type 21	ENSG00000070778	11099	FALSE	0.247258	8.57651	3.06792	0.00589844	0.0564372	-2.91347
TC0200011386.hg.1	PPP1R7	protein phosphatase 1 regulatory subunit 7	ENSG00000115685	5510	FALSE	-0.225289	9.30868	-3.06529	0.00593411	0.0567468	-2.91921
TC1200011855.hg.1	SVOP	SV2 related protein	ENSG00000166111	55530	FALSE	0.479209	4.51743	3.06477	0.00594109	0.0567704	-2.92033
TC0900011829.hg.1	RALGDS	ral guanine nucleotide dissociation stimulator	ENSG00000160271	5900	FALSE	0.207731	7.77816	3.06462	0.00594321	0.0567704	-2.92068
TC0800010926.hg.1	PAG1	phosphoprotein membrane anchor with glycosphingolipid microdomains 1	ENSG00000076641	55824	FALSE	0.366241	6.915	3.06424	0.00594828	0.0567872	-2.92149
TC1900007426.hg.1	NCAN	neurocan	ENSG00000130287	1463	FALSE	0.145231	12.011	3.06344	0.00595925	0.0568602	-2.92324
TC0200014091.hg.1	CLASP1	cytoplasmic linker associated protein 1	ENSG00000074054	23332	FALSE	0.264515	8.91116	3.06211	0.00597742	0.0569817	-2.92615
TC1900008824.hg.1	MYADM	myeloid associated differentiation marker	ENSG00000179820	91663	FALSE	-0.235566	8.36274	-3.06202	0.00597863	0.0569817	-2.92634
TC1200007418.hg.1	ANO6	anoctamin 6	ENSG00000177119	196527	FALSE	-0.300217	8.35084	-3.06173	0.00598252	0.056987	-2.92696
TC2000008198.hg.1	CPXM1	carboxypeptidase X, M14 family member 1	ENSG00000088882	56265	FALSE	0.240217	8.28529	3.06149	0.00598593	0.0569877	-2.9275
TC1700008085.hg.1	STH	saitohin	ENSG00000256762	246744	TRUE	0.285256	6.59646	3.06094	0.00599344	0.0570275	-2.9287
TC1400006656.hg.1	OXA1L	OXA1L mitochondrial inner membrane protein	ENSG00000155463	5018	FALSE	0.24691	7.76665	3.06054	0.00599884	0.0570473	-2.92956
TC1500009200.hg.1	TTBK2	tau tubulin kinase 2	ENSG00000128881	146057	FALSE	0.250831	7.6787	3.05986	0.00600829	0.0570534	-2.93106
TC1000011669.hg.1	LDB1	LIM domain binding 1	ENSG00000198728	8861	FALSE	0.200031	9.99644	3.05975	0.00600974	0.0570534	-2.93129
TC1000009916.hg.1	CUBN	cubilin	ENSG00000107611	8029	FALSE	0.578312	4.23624	3.05975	0.00600978	0.0570534	-2.93129
TC0X00009208.hg.1	BCLAF3	BCLAF1 and THRAP3 family member 3	ENSG00000173681	256643	FALSE	-0.31904	6.57744	-3.05953	0.00601281	0.0570534	-2.93177
TC1000007976.hg.1	CHST3	carbohydrate sulfotransferase 3	ENSG00000122863	9469	FALSE	-0.339451	8.89133	-3.05798	0.00603409	0.0571938	-2.93514
TC0100017844.hg.1	NID1	nidogen 1	ENSG00000116962	4811	FALSE	-0.22935	8.61189	-3.05797	0.00603428	0.0571938	-2.93517
TC0800007801.hg.1	NKAIN3	sodium/potassium transporting ATPase interacting 3	ENSG00000185942	286183	FALSE	0.236656	9.45423	3.05687	0.0060494	0.0573053	-2.93755
TC1300009622.hg.1	ZIC5	Zic family member 5	ENSG00000139800	85416	FALSE	0.309788	6.77098	3.05488	0.006077	0.0575341	-2.94189
TC1500009221.hg.1	TP53BP1	tumor protein p53 binding protein 1	ENSG00000067369	7158	FALSE	0.185759	10.5297	3.05465	0.00608027	0.0575341	-2.9424
TC1000008574.hg.1	PGAM1	phosphoglycerate mutase 1	ENSG00000171314	5223	FALSE	-0.239754	9.44955	-3.05412	0.00608767	0.0575723	-2.94356
TC0X00009707.hg.1	MAGED4	MAGE family member D4	ENSG00000154545	728239	TRUE	0.158469	10.1687	3.05256	0.00610942	0.0576658	-2.94696
TC0300011834.hg.1	FILIP1L	filamin A interacting protein 1 like	ENSG00000168386	11259	FALSE	-0.197654	8.25387	-3.0525	0.00611022	0.0576658	-2.94708
TC0300008182.hg.1	CEP97	centrosomal protein 97	ENSG00000182504	79598	FALSE	0.232103	7.71619	3.05249	0.00611035	0.0576658	-2.9471
TC0300013874.hg.1	SRPRB	SRP receptor subunit beta	ENSG00000144867	58477	FALSE	-0.298558	7.43156	-3.05244	0.00611102	0.0576658	-2.94721
TC0900009956.hg.1	SPAG8	sperm associated antigen 8	ENSG00000137098	26206	FALSE	0.325442	5.65423	3.05178	0.00612031	0.0577216	-2.94866
TC0200013765.hg.1	UXS1	UDP-glucuronate decarboxylase 1	ENSG00000115652	80146	FALSE	-0.218133	7.80051	-3.04944	0.0061531	0.057999	-2.95375
TC0800007985.hg.1	GDAP1	ganglioside induced differentiation associated protein 1	ENSG00000104381	54332	FALSE	0.328024	5.88232	3.04746	0.00618102	0.0581473	-2.95806
TC0700011799.hg.1	HEPACAM2	HEPACAM family member 2	ENSG00000188175	253012	FALSE	0.706518	3.7392	3.04724	0.00618408	0.0581473	-2.95853
TC1700011121.hg.1	TOB1	transducer of ERBB2, 1	ENSG00000141232	10140	FALSE	0.205814	9.11906	3.04712	0.00618574	0.0581473	-2.95879
TC0700008745.hg.1	PRKAR2B	protein kinase cAMP-dependent type II regulatory subunit beta	ENSG00000005249	5577	TRUE	0.288982	7.66396	3.04707	0.00618657	0.0581473	-2.95891
TC1700012445.hg.1	STRADA	STE20 related adaptor alpha	ENSG00000266173	92335	FALSE	-0.190487	9.03718	-3.04694	0.00618841	0.0581473	-2.9592
TC0300011391.hg.1	ADAMTS9	ADAM metallopeptidase with thrombospondin type 1 motif 9	ENSG00000163638	56999	FALSE	0.305642	8.47716	3.04688	0.00618921	0.0581473	-2.95932
TC1900010761.hg.1	CEACAM4	CEA cell adhesion molecule 4	ENSG00000105352	1089	TRUE	0.345432	5.56187	3.04643	0.0061956	0.0581755	-2.96031
TC0600010060.hg.1	MRPL18	mitochondrial ribosomal protein L18	ENSG00000112110	29074	FALSE	-0.199973	8.66323	-3.04599	0.0062018	0.0582018	-2.96126
TC0400009892.hg.1	CRMP1	collapsin response mediator protein 1	ENSG00000072832	1400	FALSE	0.174772	10.192	3.04486	0.00621778	0.0583188	-2.96371
TC0100007841.hg.1	CDCA8	cell division cycle associated 8	ENSG00000134690	55143	FALSE	-0.269792	6.92042	-3.04463	0.00622108	0.0583188	-2.96421
TC0300012275.hg.1	KLF15	Kruppel like factor 15	ENSG00000163884	28999	FALSE	0.345392	6.06042	3.04421	0.00622711	0.0583434	-2.96514
TC0600009611.hg.1	HEBP2	heme binding protein 2	ENSG00000051620	23593	FALSE	-0.283367	7.49468	-3.0432	0.00624146	0.0584459	-2.96733
TC0100017142.hg.1	CD34	CD34 molecule	ENSG00000174059	947	FALSE	-0.553265	4.61773	-3.04104	0.00627226	0.0587022	-2.97202
TC1100007785.hg.1	TMEM109	transmembrane protein 109	ENSG00000110108	79073	FALSE	-0.282846	8.63761	-3.04051	0.00627987	0.0587413	-2.97317
TC1900008999.hg.1	ZNF549	zinc finger protein 549	ENSG00000121406	256051	FALSE	0.505368	5.71094	3.03971	0.00629147	0.0588176	-2.97493
TC1300009288.hg.1	KCTD12	potassium channel tetramerization domain containing 12	ENSG00000178695	115207	FALSE	0.377406	6.06869	3.03903	0.00630113	0.0588394	-2.97639
TC0500008705.hg.1	TXNDC15	thioredoxin domain containing 15	ENSG00000113621	79770	FALSE	-0.145672	9.18619	-3.03899	0.00630182	0.0588394	-2.97649
TC0500013384.hg.1	PPP2R2B	protein phosphatase 2 regulatory subunit Bbeta	ENSG00000156475	5521	FALSE	0.216943	9.06686	3.03883	0.0063041	0.0588394	-2.97684
TC1100012994.hg.1	CRY2	cryptochrome circadian regulator 2	ENSG00000121671	1408	FALSE	0.330358	6.66056	3.03832	0.00631137	0.0588752	-2.97794
TC0200016688.hg.1	RAB11FIP5	RAB11 family interacting protein 5	ENSG00000135631	26056	FALSE	-0.374725	6.54364	-3.03681	0.00633321	0.0590467	-2.98122
TC0400010167.hg.1	DCAF16	DDB1 and CUL4 associated factor 16	ENSG00000163257	54876	FALSE	0.19862	9.21925	3.03482	0.00636197	0.059261	-2.98554
TC1800007059.hg.1	DTNA	dystrobrevin alpha	ENSG00000134769	1837	FALSE	0.185838	10.362	3.03475	0.00636311	0.059261	-2.98571
TC1400006718.hg.1	PSME1	proteasome activator subunit 1	ENSG00000092010	5720	TRUE	-0.22494	9.45246	-3.03405	0.00637319	0.0593226	-2.98722
TC0300012145.hg.1	FSTL1	follistatin like 1	ENSG00000163430	11167	TRUE	-0.212597	8.66878	-3.03194	0.00640394	0.059513	-2.9918
TC1400007691.hg.1	DLST	dihydrolipoamide S-succinyltransferase	ENSG00000119689	1743	FALSE	-0.272914	7.13643	-3.03194	0.00640402	0.059513	-2.99181
TC1600008942.hg.1	MRPL28	mitochondrial ribosomal protein L28	ENSG00000086504	10573	FALSE	-0.236898	6.8855	-3.03193	0.00640407	0.059513	-2.99182
TC2000007503.hg.1	UBE2C	ubiquitin conjugating enzyme E2 C	ENSG00000175063	11065	FALSE	-0.157244	9.81928	-3.03122	0.00641456	0.0595782	-2.99337
TC0X00007368.hg.1	TRO	trophinin	ENSG00000067445	7216	FALSE	0.279945	8.15011	3.03018	0.00642979	0.0596665	-2.99563
TC1300009293.hg.1	MYCBP2	MYC binding protein 2	ENSG00000005810	23077	FALSE	0.224436	9.90762	3.03009	0.00643103	0.0596665	-2.99582
TC0100015379.hg.1	NHLH2	nescient helix-loop-helix 2	ENSG00000177551	4808	FALSE	-0.530648	3.86115	-3.02894	0.00644792	0.0597827	-2.99831
TC0500008883.hg.1	PCDHB12	protocadherin beta 12	ENSG00000120328	56124	FALSE	0.378732	8.90326	3.02877	0.00645054	0.0597827	-2.9987
TC1600007819.hg.1	NKD1	NKD inhibitor of WNT signaling pathway 1	ENSG00000140807	85407	FALSE	-0.24631	5.99471	-3.02843	0.0064555	0.0597963	-2.99943
TC1000010006.hg.1	DNAJC1	DnaJ heat shock protein family (Hsp40) member C1	ENSG00000136770	64215	FALSE	-0.32751	7.39634	-3.02796	0.00646249	0.0598287	-3.00046
TC1000008556.hg.1	LCOR	ligand dependent nuclear receptor corepressor	ENSG00000196233	84458	FALSE	0.236974	8.14887	3.0275	0.00646915	0.059858	-3.00144
TC1900008020.hg.1	ACTN4	actinin alpha 4	ENSG00000130402	81	TRUE	-0.153438	10.32	-3.02483	0.00650878	0.0601921	-3.00725
TC1700009436.hg.1	MNT	MAX network transcriptional repressor	ENSG00000070444	4335	FALSE	0.186151	8.26875	3.0229	0.00653751	0.0604008	-3.01144
TC0700009696.hg.1	CHPF2	chondroitin polymerizing factor 2	ENSG00000033100	54480	TRUE	-0.175606	9.34956	-3.02284	0.0065384	0.0604008	-3.01157
TC0200013573.hg.1	ACTR1B	actin related protein 1B	ENSG00000115073	10120	FALSE	0.253289	7.59025	3.02128	0.00656168	0.0605832	-3.01495
TC1700012285.hg.1	PRR11	proline rich 11	ENSG00000068489	55771	FALSE	-0.222742	7.58651	-3.0204	0.00657479	0.0606716	-3.01685
TC1700010218.hg.1	FLOT2	flotillin 2	ENSG00000132589	2319	FALSE	-0.272409	7.63135	-3.01995	0.00658157	0.0607015	-3.01783
TC0300011403.hg.1	MAGI1	membrane associated guanylate kinase, WW and PDZ domain containing 1	ENSG00000151276	9223	TRUE	0.193685	9.60654	3.01949	0.00658846	0.0607323	-3.01883
TC1900007431.hg.1	MAU2	MAU2 sister chromatid cohesion factor	ENSG00000129933	23383	FALSE	0.182783	9.26396	3.01892	0.00659699	0.0607474	-3.02006
TC0300013384.hg.1	CLCN2	chloride voltage-gated channel 2	ENSG00000114859	1181	FALSE	0.345598	6.25506	3.01891	0.00659719	0.0607474	-3.02009
TC1600007026.hg.1	NOMO3	NODAL modulator 3	ENSG00000103226	408050	TRUE	-0.138142	10.6823	-3.01705	0.0066252	0.0609725	-3.02412
TC2200009362.hg.1	TYMP	thymidine phosphorylase	ENSG00000025708	1890	TRUE	0.391639	4.78391	3.01642	0.00663468	0.0610102	-3.02548
TC1300008113.hg.1	CUL4A	cullin 4A	ENSG00000139842	8451	FALSE	-0.201679	7.81436	-3.01611	0.00663945	0.0610102	-3.02616
TC1100008969.hg.1	ELMOD1	ELMO domain containing 1	ENSG00000110675	55531	FALSE	-0.754037	4.16724	-3.01607	0.00663998	0.0610102	-3.02624
TC1700010817.hg.1	UBTF	upstream binding transcription factor	ENSG00000108312	7343	FALSE	0.173987	9.43989	3.01529	0.00665192	0.0610871	-3.02795
TC0500011758.hg.1	CDO1	cysteine dioxygenase type 1	ENSG00000129596	1036	FALSE	0.170255	9.13684	3.01489	0.00665793	0.0611095	-3.02881
TC0500013371.hg.1	DNAJC18	DnaJ heat shock protein family (Hsp40) member C18	ENSG00000170464	202052	TRUE	0.26546	7.07648	3.01439	0.00666552	0.0611464	-3.02989
TC1100012352.hg.1	TMPRSS5	transmembrane serine protease 5	ENSG00000166682	80975	FALSE	0.318247	6.83679	3.01335	0.00668129	0.0612583	-3.03214
TC1600008829.hg.1	ZC3H18	zinc finger CCCH-type containing 18	ENSG00000158545	124245	FALSE	0.243864	7.58924	3.01239	0.00669598	0.0613601	-3.03423
TC1100013043.hg.1	FAM89B	family with sequence similarity 89 member B	ENSG00000176973	23625	FALSE	0.223256	9.09272	3.01094	0.00671806	0.0615295	-3.03736
TC1500007518.hg.1	RAB8B	RAB8B, member RAS oncogene family	ENSG00000166128	51762	FALSE	-0.208028	8.96991	-3.00993	0.00673365	0.0615809	-3.03956
TC0800011620.hg.1	ENPP2	ectonucleotide pyrophosphatase/phosphodiesterase 2	ENSG00000136960	5168	FALSE	0.519682	5.36601	3.00968	0.00673743	0.0615809	-3.04009
TC1800009218.hg.1	ANKRD20A5P	ankyrin repeat domain 20 family member A5, pseudogene		440482	FALSE	0.36748	5.74211	3.00951	0.00674009	0.0615809	-3.04047
TC1100007800.hg.1	TKFC	triokinase and FMN cyclase	ENSG00000149476	26007	FALSE	0.331157	7.27215	3.00945	0.00674095	0.0615809	-3.04059
TC0100016916.hg.1	PHLDA3	pleckstrin homology like domain family A member 3	ENSG00000174307	23612	FALSE	-0.275148	8.0851	-3.00941	0.00674165	0.0615809	-3.04069
TC2200009364.hg.1	CPT1B	carnitine palmitoyltransferase 1B	ENSG00000205560	1375	FALSE	0.2809	6.55039	3.00884	0.00675038	0.0616278	-3.04192
TC0300007165.hg.1	NKTR	natural killer cell triggering receptor	ENSG00000114857	4820	FALSE	0.170092	9.34622	3.00779	0.00676651	0.0617278	-3.04419
TC1900011907.hg.1	PDE4C	phosphodiesterase 4C	ENSG00000105650	5143	TRUE	0.402872	3.87854	3.00766	0.00676854	0.0617278	-3.04448
TC0400011313.hg.1	SNCA	synuclein alpha	ENSG00000145335	6622	FALSE	0.214427	9.23107	3.00574	0.00679809	0.0619622	-3.04862
TC0800007641.hg.1	RGS20	regulator of G protein signaling 20	ENSG00000147509	8601	FALSE	-0.420459	6.57252	-3.00553	0.00680148	0.0619622	-3.04909
TC0200007111.hg.1	WDR43	WD repeat domain 43	ENSG00000163811	23160	TRUE	-0.226232	8.32285	-3.00529	0.00680516	0.0619628	-3.04961
TC0600007854.hg.1	PI16	peptidase inhibitor 16	ENSG00000164530	221476	FALSE	0.382025	5.28527	3.00497	0.00681012	0.061975	-3.0503
TC0600007400.hg.1	ZSCAN16	zinc finger and SCAN domain containing 16	ENSG00000196812	80345	FALSE	0.208157	8.06556	3.00439	0.00681914	0.0620204	-3.05156
TC0600007378.hg.1	H4C11	H4 clustered histone 11	ENSG00000197238	8363	FALSE	0.309575	8.11134	3.00418	0.00682235	0.0620204	-3.05201
TC0100010152.hg.1	LMNA	lamin A/C	ENSG00000160789	4000	FALSE	-0.23272	8.78403	-3.00379	0.00682844	0.0620428	-3.05285
TC2200008741.hg.1	PDGFB	platelet derived growth factor subunit B	ENSG00000100311	5155	FALSE	-0.253067	7.16161	-3.00292	0.00684203	0.0621334	-3.05474
TC0200016530.hg.1	PLEKHB2	pleckstrin homology domain containing B2	ENSG00000115762	55041	FALSE	-0.27585	8.24679	-2.99951	0.00689532	0.062584	-3.06212
TC1000007061.hg.1	GPR158	G protein-coupled receptor 158	ENSG00000151025	57512	FALSE	0.331643	6.94712	2.99832	0.00691392	0.0627197	-3.06468
TC0200009074.hg.1	PTPN4	protein tyrosine phosphatase non-receptor type 4	ENSG00000088179	5775	FALSE	0.221845	8.87668	2.99808	0.0069178	0.0627216	-3.06521
TC0500011705.hg.1	NREP	neuronal regeneration related protein	ENSG00000134986	9315	FALSE	0.176634	10.681	2.99591	0.006952	0.0629983	-3.0699
TC2200008898.hg.1	TTLL1	TTL family tubulin polyglutamylase complex subunit L1	ENSG00000100271	25809	FALSE	0.248259	8.34453	2.99436	0.00697655	0.0631874	-3.07325
TC0X00011401.hg.1	RBMX	RNA binding motif protein X-linked	ENSG00000147274	27316	TRUE	0.202323	9.98895	2.99384	0.00698477	0.0632284	-3.07437
TC1700010198.hg.1	UNC119	unc-119 lipid binding chaperone	ENSG00000109103	9094	FALSE	-0.200434	8.94907	-2.99254	0.00700554	0.0633729	-3.07719
TC1200011002.hg.1	LRIG3	leucine rich repeats and immunoglobulin like domains 3	ENSG00000139263	121227	FALSE	-0.260955	8.02185	-2.99228	0.00700963	0.0633729	-3.07774
TC1700012282.hg.1	SPATA20	spermatogenesis associated 20	ENSG00000006282	64847	FALSE	-0.244179	6.42353	-2.99204	0.00701353	0.0633729	-3.07827
TC1600011221.hg.1	MVD	mevalonate diphosphate decarboxylase	ENSG00000167508	4597	FALSE	0.275991	7.6605	2.99191	0.00701553	0.0633729	-3.07854
TC0X00007127.hg.1	RBM10	RNA binding motif protein 10	ENSG00000182872	8241	FALSE	0.215218	7.78773	2.99136	0.00702428	0.0634184	-3.07973
TC0100015572.hg.1	SRGAP2B	SLIT-ROBO Rho GTPase activating protein 2B	ENSG00000196369	647135	FALSE	0.185033	9.55212	2.99082	0.00703299	0.0634637	-3.08091
TC1200008255.hg.1	ZDHHC17	zinc finger DHHC-type palmitoyltransferase 17	ENSG00000186908	23390	FALSE	0.381321	6.4648	2.98948	0.00705448	0.0636041	-3.0838
TC0600014194.hg.1	TIAM2	TIAM Rac1 associated GEF 2	ENSG00000146426	26230	FALSE	0.263557	8.9455	2.98938	0.00705598	0.0636041	-3.08401
TC0600008632.hg.1	BCKDHB	branched chain keto acid dehydrogenase E1 subunit beta	ENSG00000083123	594	FALSE	0.271011	7.4574	2.98723	0.00709058	0.0638824	-3.08865
TC0900009950.hg.1	TLN1	talin 1	ENSG00000137076	7094	TRUE	-0.257914	7.67284	-2.98663	0.00710032	0.0639365	-3.08996
TC0300010643.hg.1	CMTM6	CKLF like MARVEL transmembrane domain containing 6	ENSG00000091317	54918	FALSE	-0.35129	5.77891	-2.98627	0.00710615	0.0639553	-3.09074
TC0300012728.hg.1	PLSCR1	phospholipid scramblase 1	ENSG00000188313	5359	FALSE	-0.250107	7.1103	-2.98379	0.00714634	0.0642616	-3.09609
TC1900009022.hg.1	ZNF135	zinc finger protein 135	ENSG00000176293	7694	FALSE	0.249042	7.18463	2.98368	0.00714804	0.0642616	-3.09632
TC1900008968.hg.1	ZNF71	zinc finger protein 71	ENSG00000197951	58491	FALSE	0.402685	6.38547	2.98347	0.00715143	0.0642616	-3.09677
TC0500013251.hg.1	KCTD16	potassium channel tetramerization domain containing 16	ENSG00000183775	57528	FALSE	-0.594471	4.03883	-2.98043	0.00720105	0.0646735	-3.10334
TC1000012363.hg.1	NKX6-2	NK6 homeobox 2	ENSG00000148826	84504	FALSE	-0.377181	6.13704	-2.9766	0.007264	0.0652047	-3.1116
TC0200008627.hg.1	NPAS2	neuronal PAS domain protein 2	ENSG00000170485	4862	FALSE	-0.404237	6.75144	-2.97467	0.00729596	0.0654572	-3.11577
TC1000011743.hg.1	CFAP43	cilia and flagella associated protein 43	ENSG00000197748	80217	FALSE	0.378371	4.32223	2.974	0.00730711	0.065523	-3.11722
TC0X00008249.hg.1	SLC25A5	solute carrier family 25 member 5	ENSG00000005022	292	FALSE	-0.147162	10.5979	-2.97341	0.00731679	0.0655755	-3.11848
TC1000011555.hg.1	MORN4	MORN repeat containing 4	ENSG00000171160	118812	FALSE	0.365574	6.69711	2.9724	0.00733372	0.0656928	-3.12067
TC1100008069.hg.1	CNIH2	cornichon family AMPA receptor auxiliary protein 2	ENSG00000174871	254263	FALSE	0.314559	8.61322	2.97159	0.00734723	0.0657794	-3.12242
TC1600011080.hg.1	CIBAR2	CBY1 interacting BAR domain containing 2	ENSG00000153789	339145	FALSE	0.329043	6.05225	2.97124	0.00735304	0.065797	-3.12317
TC1900006488.hg.1	PTBP1	polypyrimidine tract binding protein 1	ENSG00000011304	5725	TRUE	-0.20075	9.63698	-2.97098	0.00735734	0.0658011	-3.12372
TC0Y00007179.hg.1	PRORY	proline rich Y-linked		100533178	FALSE	0.386845	3.91936	2.97056	0.0073644	0.0658299	-3.12463
TC1100011374.hg.1	KMT5B	lysine methyltransferase 5B	ENSG00000110066	51111	FALSE	0.282305	7.57018	2.97016	0.00737112	0.0658556	-3.1255
TC0400010303.hg.1	CCKAR	cholecystokinin A receptor	ENSG00000163394	886	FALSE	0.349175	4.01698	2.96958	0.00738082	0.0659078	-3.12675
TC0500013292.hg.1	MARCHF11	membrane associated ring-CH-type finger 11	ENSG00000183654	441061	FALSE	0.376115	3.99136	2.9686	0.00739727	0.0660204	-3.12886
TC2000009961.hg.1	SCRT2	scratch family transcriptional repressor 2	ENSG00000215397	85508	FALSE	0.587899	5.64231	2.96762	0.00741367	0.0661323	-3.13096
TC0400007330.hg.1	NSUN7	NOP2/Sun RNA methyltransferase family member 7	ENSG00000179299	79730	FALSE	-0.552082	4.58027	-2.96634	0.00743529	0.0662906	-3.13373
TC1600010000.hg.1	STX1B	syntaxin 1B	ENSG00000099365	112755	FALSE	0.387939	5.90522	2.9661	0.00743927	0.0662916	-3.13424
TC1600009580.hg.1	XYLT1	xylosyltransferase 1	ENSG00000103489	64131	TRUE	0.286214	6.38191	2.9657	0.00744612	0.0663097	-3.13511
TC1100009521.hg.1	APLP2	amyloid beta precursor like protein 2	ENSG00000084234	334	FALSE	-0.260118	9.89268	-2.96552	0.00744905	0.0663097	-3.13548
TC2000007328.hg.1	SLC32A1	solute carrier family 32 member 1	ENSG00000101438	140679	FALSE	0.467607	6.19525	2.96512	0.00745594	0.0663365	-3.13636
TC0600007262.hg.1	H3C1	H3 clustered histone 1	ENSG00000275714	8350	FALSE	0.280501	6.23072	2.9645	0.00746631	0.0663943	-3.13768
TC1900012024.hg.1	ZNF600	zinc finger protein 600	ENSG00000189190	162966	FALSE	0.368616	6.41476	2.96406	0.00747386	0.066427	-3.13864
TC2000009972.hg.1	SNRPB	small nuclear ribonucleoprotein polypeptides B and B1	ENSG00000125835	6628	FALSE	-0.230018	8.91994	-2.96318	0.0074887	0.0664932	-3.14052
TC0100017116.hg.1	C1orf116	chromosome 1 open reading frame 116	ENSG00000182795	79098	FALSE	0.507819	4.13329	2.96316	0.00748908	0.0664932	-3.14057
TC0100015956.hg.1	RUSC1-AS1	RUSC1 antisense RNA 1	ENSG00000225855	284618	FALSE	0.305891	6.94692	2.96234	0.00750298	0.0665712	-3.14233
TC1700011059.hg.1	SLC35B1	solute carrier family 35 member B1	ENSG00000121073	10237	FALSE	0.163955	9.60326	2.96219	0.00750563	0.0665712	-3.14266
TC2000009813.hg.1	EEF1A2	eukaryotic translation elongation factor 1 alpha 2	ENSG00000101210	1917	FALSE	0.394401	7.19371	2.96194	0.00750993	0.0665748	-3.14321
TC0600013271.hg.1	MTFR2	mitochondrial fission regulator 2	ENSG00000146410	113115	FALSE	-0.572245	4.85656	-2.96129	0.00752097	0.066609	-3.1446
TC0400009033.hg.1	TRIM2	tripartite motif containing 2	ENSG00000109654	23321	FALSE	0.156621	10.4099	2.96125	0.00752156	0.066609	-3.14467
TC1500010900.hg.1	MTHFS	methenyltetrahydrofolate synthetase	ENSG00000136371	10588	FALSE	-0.222692	7.27286	-2.9597	0.00754815	0.0667806	-3.14802
TC0900011533.hg.1	MAPKAP1	MAPK associated protein 1	ENSG00000119487	79109	FALSE	-0.202267	8.62064	-2.95947	0.007552	0.0667806	-3.14851
TC1900008300.hg.1	RELB	RELB proto-oncogene, NF-kB subunit	ENSG00000104856	5971	FALSE	-0.258499	6.90184	-2.95944	0.00755264	0.0667806	-3.14859
TC0400009765.hg.1	MXD4	MAX dimerization protein 4	ENSG00000123933	10608	TRUE	0.17573	9.23177	2.95736	0.00758832	0.0670434	-3.15306
TC1500010942.hg.1	LYSMD4	LysM domain containing 4	ENSG00000183060	145748	FALSE	0.505372	5.52909	2.95725	0.00759019	0.0670434	-3.15329
TC1400006791.hg.1	FOXG1	forkhead box G1	ENSG00000176165	2290	FALSE	0.195014	10.741	2.95581	0.00761497	0.0672276	-3.15638
TC1900011806.hg.1	ZNF582-DT	ZNF582 divergent transcript	ENSG00000267454	386758	FALSE	0.208422	7.75776	2.95484	0.00763174	0.0673366	-3.15847
TC1600007739.hg.1	PHKB	phosphorylase kinase regulatory subunit beta	ENSG00000102893	5257	FALSE	0.234353	8.55035	2.95449	0.00763779	0.0673366	-3.15922
TC1200007560.hg.1	DNAJC22	DnaJ heat shock protein family (Hsp40) member C22	ENSG00000178401	79962	FALSE	-0.277643	6.24796	-2.95442	0.00763911	0.0673366	-3.15939
TC1200012634.hg.1	KRT7	keratin 7	ENSG00000135480	3855	FALSE	-0.449323	6.33289	-2.95357	0.00765373	0.0674308	-3.1612
TC0600014098.hg.1	ATAT1	alpha tubulin acetyltransferase 1	ENSG00000137343	79969	TRUE	0.229785	7.39106	2.95289	0.00766552	0.0674443	-3.16266
TC0100009366.hg.1	STRIP1	striatin interacting protein 1	ENSG00000143093	85369	FALSE	0.189344	8.91026	2.95276	0.00766793	0.0674443	-3.16296
TC1200007558.hg.1	PRPH	peripherin	ENSG00000135406	5630	FALSE	0.30628	5.62389	2.95252	0.00767205	0.0674443	-3.16347
TC1100010175.hg.1	RRAS2	RAS related 2	ENSG00000133818	22800	FALSE	-0.373189	8.40039	-2.95243	0.00767364	0.0674443	-3.16366
TC0900008945.hg.1	GPR107	G protein-coupled receptor 107	ENSG00000148358	57720	FALSE	-0.194735	8.2777	-2.95235	0.00767496	0.0674443	-3.16383
TC1000012050.hg.1	FGFR2	fibroblast growth factor receptor 2	ENSG00000066468	2263	FALSE	0.298746	6.88457	2.95162	0.00768773	0.0675219	-3.1654
TC0100013629.hg.1	YARS1	tyrosyl-tRNA synthetase 1	ENSG00000134684	8565	FALSE	-0.217806	8.26978	-2.95042	0.00770872	0.0676715	-3.16799
TC1000012365.hg.1	CFAP46	cilia and flagella associated protein 46	ENSG00000171811	54777	FALSE	0.413276	5.78716	2.94941	0.00772635	0.0677916	-3.17016
TC0200008065.hg.1	TET3	tet methylcytosine dioxygenase 3	ENSG00000187605	200424	FALSE	0.302512	7.32153	2.94899	0.00773363	0.0678207	-3.17105
TC0300013971.hg.1	UCN2	urocortin 2	ENSG00000145040	90226	FALSE	-0.345836	4.81438	-2.94834	0.00774513	0.0678868	-3.17246
TC0600014235.hg.1	BLOC1S5-TXNDC5	BLOC1S5-TXNDC5 readthrough (NMD candidate)	ENSG00000259040	100526836	FALSE	-0.298432	7.35765	-2.94754	0.00775906	0.0679673	-3.17416
TC0600012713.hg.1	PREP	prolyl endopeptidase	ENSG00000085377	5550	FALSE	-0.218956	8.00575	-2.94731	0.00776318	0.0679673	-3.17466
TC1500007735.hg.1	LRRC49	leucine rich repeat containing 49	ENSG00000137821	54839	FALSE	0.379849	6.26063	2.94713	0.00776635	0.0679673	-3.17505
TC0500012317.hg.1	FGF1	fibroblast growth factor 1	ENSG00000113578	2246	FALSE	0.284733	7.04002	2.94675	0.00777304	0.0679673	-3.17587
TC1900010525.hg.1	ZNF566	zinc finger protein 566	ENSG00000186017	84924	FALSE	0.388105	4.86559	2.94669	0.00777416	0.0679673	-3.176
TC0900009825.hg.1	DDX58	DExD/H-box helicase 58	ENSG00000107201	23586	FALSE	-0.366218	6.65715	-2.94644	0.00777848	0.0679704	-3.17653
TC1100009864.hg.1	RHOG	ras homolog family member G	ENSG00000177105	391	FALSE	-0.172348	7.82545	-2.94601	0.0077861	0.0680024	-3.17746
TC0400006639.hg.1	NSG1	neuronal vesicle trafficking associated 1	ENSG00000168824	27065	FALSE	0.339837	7.49644	2.94516	0.00780105	0.0680982	-3.17928
TC1200012592.hg.1	C1S	complement C1s	ENSG00000182326	716	FALSE	-0.37336	6.69497	-2.94414	0.00781918	0.0681904	-3.18148
TC0900009711.hg.1	IFNE	interferon epsilon	ENSG00000184995	338376	TRUE	-0.544192	4.41873	-2.94411	0.00781958	0.0681904	-3.18153
TC0400011744.hg.1	ANXA5	annexin A5	ENSG00000164111	308	FALSE	-0.217403	9.75906	-2.94361	0.00782853	0.0682337	-3.18261
TC2200007068.hg.1	SLC35E4	solute carrier family 35 member E4	ENSG00000100036	339665	FALSE	-0.275618	6.63157	-2.94262	0.00784606	0.0683392	-3.18473
TC0200007184.hg.1	BIRC6	baculoviral IAP repeat containing 6	ENSG00000115760	57448	FALSE	0.22312	7.88815	2.9422	0.00785357	0.0683392	-3.18564
TC0200008680.hg.1	SLC9A2	solute carrier family 9 member A2	ENSG00000115616	6549	FALSE	0.690705	4.23005	2.94204	0.00785633	0.0683392	-3.18597
TC1500010929.hg.1	FAM174B	family with sequence similarity 174 member B	ENSG00000185442	400451	FALSE	0.353401	5.14473	2.94203	0.0078566	0.0683392	-3.18601
TC1400007112.hg.1	DMAC2L	distal membrane arm assembly component 2 like	ENSG00000125375	27109	FALSE	0.188499	8.56937	2.94175	0.00786163	0.0683483	-3.18661
TC1600007348.hg.1	SGF29	SAGA complex associated factor 29	ENSG00000176476	112869	FALSE	0.273809	7.76662	2.94145	0.00786695	0.0683598	-3.18725
TC0600011809.hg.1	CCND3	cyclin D3	ENSG00000112576	896	FALSE	-0.291095	8.13173	-2.94032	0.00788701	0.0684994	-3.18967
TC0500007610.hg.1	ERBIN	erbb2 interacting protein	ENSG00000112851	55914	FALSE	-0.450984	7.76634	-2.93803	0.00792811	0.0688214	-3.19459
TC1600008328.hg.1	DHODH	dihydroorotate dehydrogenase (quinone)	ENSG00000102967	1723	FALSE	0.276463	7.1904	2.93758	0.00793624	0.0688358	-3.19557
TC0100012242.hg.1	EFCAB2	EF-hand calcium binding domain 2	ENSG00000203666	84288	FALSE	0.314775	6.68532	2.93749	0.0079378	0.0688358	-3.19575
TC0300012781.hg.1	WWTR1	WW domain containing transcription regulator 1	ENSG00000018408	25937	FALSE	-0.178695	9.03639	-2.93649	0.0079557	0.0689561	-3.19789
TC0100007463.hg.1	HMGN2	high mobility group nucleosomal binding domain 2	ENSG00000198830	3151	FALSE	0.140201	10.3512	2.93538	0.00797583	0.0690862	-3.20028
TC0400012366.hg.1	DDX60	DExD/H-box helicase 60	ENSG00000137628	55601	FALSE	-0.379165	5.10056	-2.93521	0.00797877	0.0690862	-3.20063
TC2100007241.hg.1	ABCG1	ATP binding cassette subfamily G member 1	ENSG00000160179	9619	FALSE	0.392791	3.95393	2.9347	0.00798801	0.0691312	-3.20173
TC1900011677.hg.1	IL27RA	interleukin 27 receptor subunit alpha	ENSG00000104998	9466	TRUE	0.358673	5.47577	2.93441	0.0079933	0.0691421	-3.20236
TC0500007201.hg.1	OSMR	oncostatin M receptor	ENSG00000145623	9180	FALSE	-0.332634	7.12988	-2.93417	0.00799763	0.0691446	-3.20287
TC0300013911.hg.1	DNAJB11	DnaJ heat shock protein family (Hsp40) member B11	ENSG00000090520	51726	FALSE	-0.187971	9.53978	-2.93352	0.00800937	0.0692111	-3.20426
TC1100009962.hg.1	FHIP1B	FHF complex subunit HOOK interacting protein 1B	ENSG00000051009	84067	FALSE	0.245137	7.96308	2.93289	0.00802079	0.0692377	-3.20561
TC2000009186.hg.1	FITM2	fat storage inducing transmembrane protein 2	ENSG00000197296	128486	FALSE	-0.245488	7.41156	-2.93275	0.00802336	0.0692377	-3.20591
TC1600009072.hg.1	HS3ST6	heparan sulfate-glucosamine 3-sulfotransferase 6	ENSG00000162040	64711	TRUE	-0.481171	5.07048	-2.93242	0.00802937	0.0692377	-3.20662
TC1500008370.hg.1	ST8SIA2	ST8 alpha-N-acetyl-neuraminide alpha-2,8-sialyltransferase 2	ENSG00000140557	8128	FALSE	0.232163	6.76194	2.93226	0.00803231	0.0692377	-3.20697
TC0100015550.hg.1	FAM72C	family with sequence similarity 72 member C	ENSG00000263513	554282	FALSE	-0.322076	6.52746	-2.93224	0.00803266	0.0692377	-3.20701
TC0700013060.hg.1	TMUB1	transmembrane and ubiquitin like domain containing 1	ENSG00000164897	83590	FALSE	-0.201223	8.1916	-2.93151	0.00804587	0.0693167	-3.20857
TC0800007899.hg.1	SULF1	sulfatase 1	ENSG00000137573	23213	FALSE	-0.451517	4.74455	-2.92829	0.00810475	0.0697889	-3.21547
TC0200008930.hg.1	SLC20A1	solute carrier family 20 member 1	ENSG00000144136	6574	FALSE	-0.39188	7.38195	-2.92712	0.00812627	0.069939	-3.21799
TC0500007868.hg.1	SCAMP1	secretory carrier membrane protein 1	ENSG00000085365	9522	FALSE	0.273668	7.69324	2.92643	0.00813889	0.0700125	-3.21946
TC0500008554.hg.1	MEGF10	multiple EGF like domains 10	ENSG00000145794	84466	FALSE	0.383533	7.15973	2.92589	0.00814885	0.0700559	-3.22061
TC0500012463.hg.1	CAMK2A	calcium/calmodulin dependent protein kinase II alpha	ENSG00000070808	815	FALSE	0.352157	6.88251	2.92549	0.00815617	0.0700559	-3.22147
TC1100009817.hg.1	PHLDA2	pleckstrin homology like domain family A member 2	ENSG00000181649	7262	TRUE	-0.545798	5.42358	-2.92549	0.00815621	0.0700559	-3.22147
TC1900011231.hg.1	KLK7	kallikrein related peptidase 7	ENSG00000169035	5650	FALSE	-0.253162	4.6937	-2.92506	0.00816427	0.070079	-3.22241
TC1000012586.hg.1	SEC31B	SEC31 homolog B, COPII coat complex component	ENSG00000075826	25956	FALSE	0.199235	7.30389	2.9249	0.00816709	0.070079	-3.22273
TC0700012013.hg.1	GIGYF1	GRB10 interacting GYF protein 1	ENSG00000146830	64599	FALSE	0.351939	5.5569	2.92402	0.00818339	0.0701838	-3.22462
TC0700013366.hg.1	ZNF735	zinc finger protein 735	ENSG00000223614	730291	FALSE	0.300936	4.84412	2.92346	0.00819377	0.0702376	-3.22582
TC0100008260.hg.1	CDKN2C	cyclin dependent kinase inhibitor 2C	ENSG00000123080	1031	FALSE	0.215619	7.49642	2.92309	0.00820072	0.070262	-3.22662
[truncated: 15,128 more rows]

## Sheet: Expression in Week2
PROBEID	SYMBOL	GENENAME	ENSEMBL	ENTREZID	duplicate.annotation	logFC	AveExpr	t	P.Value	adj.P.Val	B
TC0800008679.hg.1	COL14A1	collagen type XIV alpha 1 chain	ENSG00000187955	7373	FALSE	-2.75482	5.79898	-15.4496	7.59025e-13	6.12011e-09	18.7126
TC0600007244.hg.1	SCGN	secretagogin, EF-hand calcium binding protein	ENSG00000079689	10590	FALSE	1.03156	8.25469	15.2964	9.18446e-13	6.12011e-09	18.5524
TC1000012169.hg.1	ADAM12	ADAM metallopeptidase domain 12	ENSG00000148848	8038	FALSE	-1.54282	7.20504	-15.1731	1.07201e-12	6.12011e-09	18.4221
TC0400012967.hg.1	MGARP	mitochondria localized glutamic acid rich protein	ENSG00000137463	84709	FALSE	-1.91445	5.47636	-14.0263	4.76051e-12	1.69436e-08	17.1474
TC0800007051.hg.1	NEFM	neurofilament medium chain	ENSG00000104722	4741	FALSE	-1.34941	7.50046	-13.9978	4.94646e-12	1.69436e-08	17.1142
TC0600013458.hg.1	EPM2A	EPM2A glucan phosphatase, laforin	ENSG00000112425	7957	FALSE	-1.9414	6.87916	-13.3791	1.15467e-11	3.29602e-08	16.3751
TC1100012722.hg.1	CDON	cell adhesion associated, oncogene regulated	ENSG00000064309	50937	FALSE	-0.729313	9.6222	-12.4041	4.69161e-11	1.0674e-07	15.1327
TC0600007650.hg.1	HLA-DRA	major histocompatibility complex, class II, DR alpha	ENSG00000204287	3122	TRUE	-1.38499	6.51278	-12.363	4.98583e-11	1.0674e-07	15.0782
TC0200015000.hg.1	CHRNA1	cholinergic receptor nicotinic alpha 1 subunit	ENSG00000138435	1134	FALSE	-1.30578	5.8732	-12.0834	7.58074e-11	1.34736e-07	14.7021
TC0600011517.hg.1	HLA-DPA1	major histocompatibility complex, class II, DP alpha 1	ENSG00000231389	3113	TRUE	-1.08567	6.61134	-12.0589	7.86686e-11	1.34736e-07	14.6687
TC0400012796.hg.1	PDGFRA	platelet derived growth factor receptor alpha	ENSG00000134853	5156	FALSE	-0.724545	9.49144	-11.6744	1.41809e-10	2.17648e-07	14.1362
TC0900011220.hg.1	SUSD1	sushi domain containing 1	ENSG00000106868	64420	FALSE	-0.870563	9.20029	-11.6277	1.52495e-10	2.17648e-07	14.0703
TC1900011894.hg.1	CACNA1A	calcium voltage-gated channel subunit alpha1 A	ENSG00000141837	773	FALSE	-1.34844	7.75905	-11.545	1.73499e-10	2.28579e-07	13.9531
TC0600014277.hg.1	HLA-DMA	major histocompatibility complex, class II, DM alpha	ENSG00000204257	3108	TRUE	-0.994288	7.53248	-11.1166	3.423e-10	4.18755e-07	13.3331
TC0X00010512.hg.1	CHRDL1	chordin like 1	ENSG00000101938	91851	FALSE	0.894819	8.4283	10.954	4.4526e-10	5.08398e-07	13.0919
TC0300013598.hg.1	LRRC15	leucine rich repeat containing 15	ENSG00000172061	131578	FALSE	-1.63463	7.16507	-10.8705	5.10197e-10	5.15236e-07	12.9668
TC2100007176.hg.1	PCP4	Purkinje cell protein 4	ENSG00000183036	5121	FALSE	0.708352	10.1669	10.869	5.11416e-10	5.15236e-07	12.9646
TC1500007972.hg.1	CRABP1	cellular retinoic acid binding protein 1	ENSG00000166426	1381	FALSE	-1.06605	7.92668	-10.7552	6.16431e-10	5.86534e-07	12.7927
TC0500008736.hg.1	TGFBI	transforming growth factor beta induced	ENSG00000120708	7045	FALSE	-1.45556	5.37808	-10.5899	8.10555e-10	7.30651e-07	12.5401
TC0500009023.hg.1	JAKMIP2-AS1	JAKMIP2 antisense RNA 1	ENSG00000280780	153469	FALSE	-1.25603	5.89324	-10.458	1.01074e-09	8.56459e-07	12.3359
TC0100016631.hg.1	RGS16	regulator of G protein signaling 16	ENSG00000143333	6004	FALSE	-0.924513	6.99728	-10.4352	1.05013e-09	8.56459e-07	12.3005
TC0200014414.hg.1	CXCR4	C-X-C motif chemokine receptor 4	ENSG00000121966	7852	FALSE	0.649334	9.45416	9.97253	2.31556e-09	1.75671e-06	11.5654
TC0200015650.hg.1	FN1	fibronectin 1	ENSG00000115414	2335	FALSE	-0.930075	7.64722	-9.95892	2.37096e-09	1.75671e-06	11.5434
TC1300008249.hg.1	GJB2	gap junction protein beta 2	ENSG00000165474	2706	FALSE	-1.87867	5.29121	-9.93732	2.46167e-09	1.75671e-06	11.5083
TC1400007632.hg.1	PAPLN	papilin, proteoglycan like sulfated glycoprotein	ENSG00000100767	89932	FALSE	-0.973157	6.99534	-9.8823	2.70946e-09	1.8562e-06	11.4188
TC0700006690.hg.1	NXPH1	neurexophilin 1	ENSG00000122584	30010	FALSE	0.97094	7.36989	9.84689	2.88248e-09	1.86054e-06	11.3609
TC0100018306.hg.1	CADM3	cell adhesion molecule 3	ENSG00000162706	57863	FALSE	0.708593	8.42623	9.83696	2.93307e-09	1.86054e-06	11.3446
TC1800008804.hg.1	ALPK2	alpha kinase 2	ENSG00000198796	115701	FALSE	-0.766836	8.15389	-9.65466	4.04446e-09	2.47391e-06	11.0439
TC1600011186.hg.1	SLC7A5	solute carrier family 7 member 5	ENSG00000103257	8140	FALSE	-0.946158	8.18184	-9.44733	5.85697e-09	3.42223e-06	10.6963
TC0300010632.hg.1	OSBPL10	oxysterol binding protein like 10	ENSG00000144645	114884	FALSE	-0.891435	7.30649	-9.43443	5.99445e-09	3.42223e-06	10.6744
TC2100007821.hg.1	ADAMTS1	ADAM metallopeptidase with thrombospondin type 1 motif 1	ENSG00000154734	9510	FALSE	-1.85982	4.68607	-9.35149	6.96273e-09	3.8468e-06	10.5336
TC0600013395.hg.1	NMBR	neuromedin B receptor	ENSG00000135577	4829	FALSE	-1.50757	5.61736	-9.08577	1.13133e-08	6.0551e-06	10.0757
TC0500013193.hg.1	CRHBP	corticotropin releasing hormone binding protein	ENSG00000145708	1393	FALSE	-0.594173	8.73232	-8.91479	1.55338e-08	8.06205e-06	9.77586
TC0100015023.hg.1	DPYD	dihydropyrimidine dehydrogenase	ENSG00000188641	1806	FALSE	-0.673188	8.15177	-8.7505	2.11397e-08	1.06488e-05	9.48376
TC0300012155.hg.1	HGD	homogentisate 1,2-dioxygenase	ENSG00000113924	3081	FALSE	-1.26391	5.56999	-8.73207	2.1888e-08	1.07107e-05	9.45075
TC1200007594.hg.1	ASIC1	acid sensing ion channel subunit 1	ENSG00000110881	41	FALSE	0.61243	7.97294	8.70906	2.28608e-08	1.0876e-05	9.40947
TC1300008645.hg.1	TRPC4	transient receptor potential cation channel subfamily C member 4	ENSG00000133107	7223	FALSE	0.817679	6.47639	8.63315	2.64002e-08	1.22204e-05	9.27274
TC1000010132.hg.1	MKX	mohawk homeobox	ENSG00000150051	283078	FALSE	0.781605	6.49834	8.59655	2.83049e-08	1.26108e-05	9.20651
TC0600014273.hg.1	HLA-DRB1	major histocompatibility complex, class II, DR beta 1	ENSG00000196126	3123	TRUE	-0.983269	5.69306	-8.58898	2.87162e-08	1.26108e-05	9.1928
TC0500012470.hg.1	CD74	CD74 molecule	ENSG00000019582	972	FALSE	-0.991884	7.69652	-8.54663	3.11356e-08	1.33315e-05	9.11587
TC1100008435.hg.1	RNF169	ring finger protein 169	ENSG00000166439	254225	FALSE	-0.738513	8.39635	-8.37495	4.33194e-08	1.80959e-05	8.80137
TC2200006945.hg.1	SEZ6L	seizure related 6 homolog like	ENSG00000100095	23544	FALSE	0.736831	9.12223	8.27612	5.24815e-08	2.14012e-05	8.61837
TC0300012212.hg.1	MYLK	myosin light chain kinase	ENSG00000065534	4638	FALSE	-0.74368	7.74443	-8.08533	7.62862e-08	3.0385e-05	8.26103
TC1700010223.hg.1	SEZ6	seizure related 6 homolog	ENSG00000063015	124925	FALSE	0.629226	8.85973	7.95383	9.90007e-08	3.8536e-05	8.01159
TC0800009113.hg.1	PTP4A3	protein tyrosine phosphatase 4A3	ENSG00000184489	11156	TRUE	-0.502006	10.0847	-7.87295	1.16345e-07	4.38407e-05	7.85692
TC2100008562.hg.1	RUNX1	RUNX family transcription factor 1	ENSG00000159216	861	FALSE	-0.695456	9.50502	-7.85985	1.19438e-07	4.38407e-05	7.83177
TC0300011834.hg.1	FILIP1L	filamin A interacting protein 1 like	ENSG00000168386	11259	FALSE	-0.539841	8.25387	-7.85623	1.20308e-07	4.38407e-05	7.82481
TC0300007669.hg.1	SYNPR	synaptoporin	ENSG00000163630	132204	FALSE	1.03692	6.33774	7.78609	1.38506e-07	4.94208e-05	7.68972
TC0400010853.hg.1	TECRL	trans-2,3-enoyl-CoA reductase like	ENSG00000205678	253017	FALSE	1.32186	4.55794	7.76256	1.45231e-07	5.07627e-05	7.64423
TC0100017193.hg.1	KCNH1	potassium voltage-gated channel subfamily H member 1	ENSG00000143473	3756	FALSE	-0.910523	6.52946	-7.6934	1.67016e-07	5.72095e-05	7.51007
TC0200015266.hg.1	TMEFF2	transmembrane protein with EGF like and two follistatin like domains 2	ENSG00000144339	23671	FALSE	-0.54659	8.72248	-7.66101	1.78351e-07	5.98946e-05	7.447
TC0700011626.hg.1	SEMA3C	semaphorin 3C	ENSG00000075223	10512	FALSE	-2.05625	4.99836	-7.56649	2.16206e-07	6.99579e-05	7.26203
TC1500007839.hg.1	ISLR	immunoglobulin superfamily containing leucine rich repeat	ENSG00000129009	3671	TRUE	-0.618808	8.37145	-7.56585	2.16487e-07	6.99579e-05	7.26079
TC2000008445.hg.1	FLRT3	fibronectin leucine rich transmembrane protein 3	ENSG00000125848	23767	FALSE	-0.535897	8.57267	-7.49743	2.49039e-07	7.89868e-05	7.12607
TC0700009560.hg.1	CNTNAP2	contactin associated protein 2	ENSG00000174469	26047	TRUE	-0.804833	6.11437	-7.45569	2.71343e-07	8.44962e-05	7.04354
TC0600014247.hg.1	RIPOR2	RHO family interacting cell polarization regulator 2	ENSG00000111913	9750	FALSE	0.653431	6.88473	7.4347	2.83323e-07	8.66514e-05	7.00195
TC1100012452.hg.1	DSCAML1	DS cell adhesion molecule like 1	ENSG00000177103	57453	FALSE	0.720961	6.40346	7.40127	3.03548e-07	9.02487e-05	6.93557
TC0800008243.hg.1	PDP1	pyruvate dehydrogenase phosphatase catalytic subunit 1	ENSG00000164951	54704	FALSE	-0.515305	10.3537	-7.39797	3.05624e-07	9.02487e-05	6.92901
TC1400009738.hg.1	TGFB3	transforming growth factor beta 3	ENSG00000119699	7043	FALSE	-0.617416	6.96908	-7.25248	4.13335e-07	0.000119986	6.63812
TC0300012449.hg.1	CPNE4	copine 4	ENSG00000196353	131034	FALSE	0.931267	6.12975	7.22239	4.40119e-07	0.000125632	6.57758
TC1300009012.hg.1	THSD1	thrombospondin type 1 domain containing 1	ENSG00000136114	55901	FALSE	0.535449	7.21451	7.16995	4.91165e-07	0.000136122	6.47174
TC0400010205.hg.1	KCNIP4	potassium voltage-gated channel interacting protein 4	ENSG00000185774	80333	TRUE	-1.06056	6.41054	-7.1661	4.95138e-07	0.000136122	6.46396
TC1900011542.hg.1	PEG3	paternally expressed 3	ENSG00000198300	5178	TRUE	0.500065	8.48214	7.16077	5.00711e-07	0.000136122	6.45317
TC1000008767.hg.1	INA	internexin neuronal intermediate filament protein alpha	ENSG00000148798	9118	FALSE	0.569434	9.68521	7.11287	5.53707e-07	0.000148177	6.35608
TC0600011960.hg.1	TNFRSF21	TNF receptor superfamily member 21	ENSG00000146072	27242	FALSE	0.58627	7.31579	7.08008	5.93284e-07	0.000156326	6.28944
TC2000007251.hg.1	MYL9	myosin light chain 9	ENSG00000101335	10398	FALSE	-0.664837	7.99256	-7.02148	6.71437e-07	0.000171769	6.16994
TC1700010757.hg.1	PTGES3L-AARSD1	PTGES3L-AARSD1 readthrough	ENSG00000108825	100885850	TRUE	-0.561305	8.349	-7.02112	6.71954e-07	0.000171769	6.16919
TC1100010026.hg.1	LMO1	LIM domain only 1	ENSG00000166407	4004	FALSE	-0.939449	6.38069	-6.99738	7.06596e-07	0.000177969	6.12063
TC1100007884.hg.1	SLC3A2	solute carrier family 3 member 2	ENSG00000168003	6520	FALSE	-0.362019	9.59489	-6.97273	7.44502e-07	0.000182644	6.07015
TC1300007718.hg.1	GPC6	glypican 6	ENSG00000183098	10082	FALSE	-0.511434	8.06334	-6.97148	7.46485e-07	0.000182644	6.06758
TC0900011340.hg.1	ASTN2	astrotactin 2	ENSG00000148219	23245	FALSE	0.483707	7.66902	6.95232	7.77481e-07	0.000187548	6.02826
TC1200010839.hg.1	ITGA5	integrin subunit alpha 5	ENSG00000161638	3678	FALSE	-1.09299	6.00893	-6.93822	8.01145e-07	0.000189596	5.99929
TC1800006506.hg.1	MYL12A	myosin light chain 12A	ENSG00000101608	10627	FALSE	-0.46471	8.85015	-6.93415	8.08109e-07	0.000189596	5.99092
TC0100017957.hg.1	PLD5	phospholipase D family member 5	ENSG00000180287	200150	FALSE	0.632082	7.83336	6.91255	8.46132e-07	0.000195834	5.94648
TC2100006951.hg.1	OLIG1	oligodendrocyte transcription factor 1	ENSG00000184221	116448	FALSE	1.39715	6.4372	6.88066	9.05667e-07	0.000206818	5.88074
TC0100006931.hg.1	PDPN	podoplanin	ENSG00000162493	10630	FALSE	-0.819624	6.50999	-6.83462	9.99341e-07	0.000223393	5.78556
TC0X00009208.hg.1	BCLAF3	BCLAF1 and THRAP3 family member 3	ENSG00000173681	256643	FALSE	-0.756065	6.57744	-6.83229	1.00434e-06	0.000223393	5.78074
TC1300009954.hg.1	DNAJC15	DnaJ heat shock protein family (Hsp40) member C15	ENSG00000120675	29103	FALSE	-0.556745	8.4929	-6.81576	1.04053e-06	0.000228477	5.7465
TC1000012213.hg.1	INSYN2A	inhibitory synaptic factor 2A	ENSG00000188916	642938	FALSE	-0.704463	7.61613	-6.80768	1.05871e-06	0.000229526	5.72974
TC1000012117.hg.1	CHST15	carbohydrate sulfotransferase 15	ENSG00000182022	51363	FALSE	0.426336	9.9564	6.7635	1.16403e-06	0.000246922	5.63799
TC1200008924.hg.1	DTX1	deltex E3 ubiquitin ligase 1	ENSG00000135144	1840	FALSE	0.693322	7.20084	6.76201	1.16779e-06	0.000246922	5.63487
TC0X00010670.hg.1	TMEM255A	transmembrane protein 255A	ENSG00000125355	55026	FALSE	-0.886984	6.86566	-6.73395	1.24046e-06	0.00025909	5.57644
TC0100018307.hg.1	ACKR1	atypical chemokine receptor 1 (Duffy blood group)	ENSG00000213088	2532	FALSE	0.747181	5.42822	6.6978	1.34103e-06	0.00027672	5.50099
TC0800010918.hg.1	ZNF704	zinc finger protein 704	ENSG00000164684	619279	FALSE	0.539856	7.89628	6.60704	1.63208e-06	0.000331721	5.31079
TC1400008615.hg.1	NDRG2	NDRG family member 2	ENSG00000165795	57447	TRUE	0.543838	7.87295	6.60305	1.64631e-06	0.000331721	5.30238
TC0400009110.hg.1	GRIA2	glutamate ionotropic receptor AMPA type subunit 2	ENSG00000120251	2891	FALSE	0.516909	9.43093	6.57961	1.7323e-06	0.000344989	5.25306
TC0400011486.hg.1	CXXC4	CXXC finger protein 4	ENSG00000168772	80319	FALSE	1.06965	4.40728	6.55924	1.81079e-06	0.000356475	5.21013
TC0300013849.hg.1	ROBO2	roundabout guidance receptor 2	ENSG00000185008	6092	FALSE	0.496446	8.51996	6.54976	1.84854e-06	0.000359772	5.19014
TC0600008146.hg.1	RUNX2	RUNX family transcription factor 2	ENSG00000124813	860	FALSE	-0.546921	8.05101	-6.47422	2.17987e-06	0.000419491	5.03036
TC0100018556.hg.1	BLACAT1	BLACAT1 overlapping LEMD1 locus	ENSG00000281406	101669762	FALSE	0.644563	6.31494	6.46322	2.23296e-06	0.000424933	5.00703
TC1900011004.hg.1	SLC1A5	solute carrier family 1 member 5	ENSG00000105281	6510	FALSE	-0.683514	7.23193	-6.43915	2.35384e-06	0.000440386	4.95592
TC0900011217.hg.1	PTBP3	polypyrimidine tract binding protein 3	ENSG00000119314	9991	FALSE	-0.431222	7.94555	-6.43573	2.37153e-06	0.000440386	4.94866
TC0800011683.hg.1	FBXO32	F-box protein 32	ENSG00000156804	114907	FALSE	0.391608	9.55373	6.43195	2.39131e-06	0.000440386	4.94061
TC0200009739.hg.1	GALNT5	polypeptide N-acetylgalactosaminyltransferase 5	ENSG00000136542	11227	FALSE	-0.583413	6.62239	-6.37421	2.71464e-06	0.000494613	4.81764
TC0100010188.hg.1	BCAN	brevican	ENSG00000132692	63827	FALSE	0.451329	8.75337	6.29333	3.24466e-06	0.000580632	4.64463
TC1700008228.hg.1	ITGA3	integrin subunit alpha 3	ENSG00000005884	3675	FALSE	0.394694	9.13386	6.28852	3.27929e-06	0.000580632	4.63433
TC1800007052.hg.1	ASXL3	ASXL transcriptional regulator 3	ENSG00000141431	80816	FALSE	0.789016	3.89014	6.28726	3.28845e-06	0.000580632	4.63162
TC0300006599.hg.1	SLC6A1	solute carrier family 6 member 1	ENSG00000157103	6529	FALSE	0.620744	6.97888	6.28188	3.3278e-06	0.000581584	4.62008
TC0300007013.hg.1	ARPP21	cAMP regulated phosphoprotein 21	ENSG00000172995	10777	FALSE	-0.951996	6.12208	-6.27129	3.40669e-06	0.000585162	4.59735
TC0600011661.hg.1	STK38	serine/threonine kinase 38	ENSG00000112079	11329	FALSE	0.490929	9.0144	6.26998	3.4166e-06	0.000585162	4.59453
TC1200007365.hg.1	PDZRN4	PDZ domain containing ring finger 4	ENSG00000165966	29951	FALSE	0.840474	5.88265	6.23521	3.69012e-06	0.000625749	4.5198
TC0600011401.hg.1	C6orf15	chromosome 6 open reading frame 15	ENSG00000204542	29113	TRUE	-0.872735	6.93512	-6.22879	3.74305e-06	0.00062726	4.50598
TC0X00010032.hg.1	CITED1	Cbp/p300 interacting transactivator with Glu/Asp rich carboxy-terminal domain 1	ENSG00000125931	4435	FALSE	-0.452116	8.11513	-6.22529	3.77228e-06	0.00062726	4.49843
TC1600010561.hg.1	CDH11	cadherin 11	ENSG00000140937	1009	FALSE	-0.696873	5.99645	-6.18799	4.09801e-06	0.000674871	4.41804
TC1400009992.hg.1	FBLN5	fibulin 5	ENSG00000140092	10516	FALSE	0.58355	7.82676	6.1743	4.22477e-06	0.000689121	4.38847
TC1300009218.hg.1	DACH1	dachshund family transcription factor 1	ENSG00000276644	1602	FALSE	-0.439859	9.20459	-6.0939	5.0543e-06	0.000816651	4.21442
TC1100012906.hg.1	IGSF9B	immunoglobulin superfamily member 9B	ENSG00000080854	22997	FALSE	0.470633	7.8717	6.07638	5.25614e-06	0.000841327	4.1764
TC0900008708.hg.1	LHX2	LIM homeobox 2	ENSG00000106689	9355	FALSE	-0.664075	7.76268	-6.04062	5.69425e-06	0.000903013	4.09865
TC0600014318.hg.1	TENT5A	terminal nucleotidyltransferase 5A	ENSG00000112773	55603	FALSE	-0.635832	6.81968	-6.02565	5.88855e-06	0.000925259	4.06606
TC0100007638.hg.1	SERINC2	serine incorporator 2	ENSG00000168528	347735	FALSE	-0.853953	7.62448	-5.99156	6.35697e-06	0.00098978	3.99172
TC0600007847.hg.1	CDKN1A	cyclin dependent kinase inhibitor 1A	ENSG00000124762	1026	FALSE	-0.407695	8.53124	-5.98267	6.48522e-06	0.000995251	3.97231
TC0200016553.hg.1	DAPL1	death associated protein like 1	ENSG00000163331	92196	FALSE	0.791417	5.12293	5.98109	6.50833e-06	0.000995251	3.96886
TC0200012559.hg.1	NRXN1	neurexin 1	ENSG00000179915	9378	FALSE	0.873169	5.58777	5.96976	6.67615e-06	0.00101188	3.94413
TC1900007436.hg.1	GATAD2A	GATA zinc finger domain containing 2A	ENSG00000167491	54815	TRUE	-0.454546	9.33447	-5.89581	7.88688e-06	0.0011849	3.78222
TC1900007012.hg.1	LDLR	low density lipoprotein receptor	ENSG00000130164	3949	TRUE	0.418304	7.79184	5.88706	8.04428e-06	0.00119541	3.76302
TC0800011211.hg.1	NIPAL2	NIPA like domain containing 2	ENSG00000104361	79815	FALSE	-0.94114	3.94907	-5.8842	8.09646e-06	0.00119541	3.75674
TC1200012080.hg.1	TESC	tescalcin	ENSG00000088992	54997	FALSE	-0.882712	5.2912	-5.86491	8.45723e-06	0.00123801	3.71438
TC0600010057.hg.1	ACAT2	acetyl-CoA acetyltransferase 2	ENSG00000120437	39	FALSE	0.31899	9.058	5.85067	8.7341e-06	0.00126317	3.68307
TC0X00007195.hg.1	RBM3	RNA binding motif protein 3	ENSG00000102317	5935	FALSE	0.340213	8.11961	5.84498	8.84739e-06	0.00126317	3.67055
TC0900010543.hg.1	TLE1	TLE family member 1, transcriptional corepressor	ENSG00000196781	7088	FALSE	-0.39836	9.44262	-5.84483	8.85037e-06	0.00126317	3.67022
TC1600008301.hg.1	CALB2	calbindin 2	ENSG00000172137	794	TRUE	0.298055	10.9446	5.80582	9.66845e-06	0.00136852	3.58431
TC1200011812.hg.1	CRY1	cryptochrome circadian regulator 1	ENSG00000008405	1407	FALSE	-0.515505	7.46157	-5.78905	1.00433e-05	0.00140827	3.54735
TC1000007871.hg.1	STOX1	storkhead box 1	ENSG00000165730	219736	FALSE	-0.498743	7.22352	-5.78598	1.01137e-05	0.00140827	3.54056
TC1700011088.hg.1	COL1A1	collagen type I alpha 1 chain	ENSG00000108821	1277	FALSE	-0.728886	8.26763	-5.78041	1.02424e-05	0.00141469	3.52827
TC0700011785.hg.1	CDK6	cyclin dependent kinase 6	ENSG00000105810	1021	FALSE	-0.418295	9.03982	-5.71542	1.18739e-05	0.00162691	3.38461
TC0200006831.hg.1	VSNL1	visinin like 1	ENSG00000163032	7447	FALSE	0.637721	7.15878	5.70098	1.22712e-05	0.001668	3.35262
TC0200016651.hg.1	CYP1B1	cytochrome P450 family 1 subfamily B member 1	ENSG00000138061	1545	FALSE	-0.960544	4.54953	-5.60129	1.54104e-05	0.00206793	3.1312
TC1600011360.hg.1	SYT17	synaptotagmin 17	ENSG00000103528	51760	FALSE	-0.342221	9.52514	-5.59933	1.548e-05	0.00206793	3.12682
TC0400006718.hg.1	SORCS2	sortilin related VPS10 domain containing receptor 2	ENSG00000184985	57537	FALSE	0.527358	7.60977	5.59664	1.55755e-05	0.00206793	3.12083
TC0900009902.hg.1	ENHO	energy homeostasis associated	ENSG00000168913	375704	FALSE	0.540953	7.50333	5.58952	1.58317e-05	0.00208576	3.10498
TC0100016831.hg.1	ASPM	assembly factor for spindle microtubules	ENSG00000066279	259266	FALSE	-0.478697	8.11024	-5.58588	1.59645e-05	0.0020872	3.09686
TC2200009248.hg.1	KREMEN1	kringle containing transmembrane protein 1	ENSG00000183762	83999	FALSE	-0.44638	8.10722	-5.57436	1.63917e-05	0.00212682	3.07118
TC0600014106.hg.1	CFB	complement factor B	ENSG00000243649	629	TRUE	-0.758493	5.3699	-5.56948	1.65759e-05	0.00213455	3.06032
TC0500008454.hg.1	PRR16	proline rich 16	ENSG00000184838	51334	FALSE	-0.994689	5.31222	-5.56533	1.67346e-05	0.00213891	3.05106
TC0500011352.hg.1	EDIL3	EGF like repeats and discoidin domains 3	ENSG00000164176	10085	FALSE	-1.17161	3.96387	-5.5556	1.71124e-05	0.00215507	3.02936
TC0400008813.hg.1	MGST2	microsomal glutathione S-transferase 2	ENSG00000085871	4258	FALSE	-0.353063	8.46335	-5.55559	1.71127e-05	0.00215507	3.02933
TC0400012902.hg.1	FGFBP2	fibroblast growth factor binding protein 2	ENSG00000137441	83888	FALSE	-0.933495	6.37359	-5.54256	1.76323e-05	0.00220429	3.00026
TC0100013545.hg.1	SDC3	syndecan 3	ENSG00000162512	9672	FALSE	-0.38185	10.0004	-5.53303	1.80228e-05	0.00222655	2.97896
TC0600007677.hg.1	HLA-DPB1	major histocompatibility complex, class II, DP beta 1	ENSG00000223865	3115	TRUE	-1.02658	5.01583	-5.53188	1.80703e-05	0.00222655	2.97641
TC1400009147.hg.1	PYGL	glycogen phosphorylase L	ENSG00000100504	5836	FALSE	-0.520963	7.60922	-5.51612	1.8737e-05	0.0022922	2.94119
TC1300009488.hg.1	DCT	dopachrome tautomerase	ENSG00000080166	1638	FALSE	-0.43212	7.64693	-5.50283	1.93184e-05	0.00234657	2.91148
TC0900010737.hg.1	DIRAS2	DIRAS family GTPase 2	ENSG00000165023	54769	FALSE	-0.504251	7.34899	-5.49123	1.98412e-05	0.00239309	2.88552
TC2100008256.hg.1	RSPH1	radial spoke head component 1	ENSG00000160188	89765	FALSE	0.599064	4.72226	5.47924	2.03964e-05	0.0024428	2.85869
TC0800011844.hg.1	ADCY8	adenylate cyclase 8	ENSG00000155897	114	FALSE	0.867303	6.29412	5.47554	2.05706e-05	0.0024428	2.85042
TC0X00010326.hg.1	PCDH19	protocadherin 19	ENSG00000165194	57526	FALSE	-0.471483	7.63953	-5.47322	2.06811e-05	0.0024428	2.84521
TC1200011385.hg.1	LIN7A	lin-7 homolog A, crumbs cell polarity complex component	ENSG00000111052	8825	FALSE	-0.706345	6.85356	-5.42136	2.33083e-05	0.00273425	2.72895
TC0300012773.hg.1	TM4SF1	transmembrane 4 L six family member 1	ENSG00000169908	4071	FALSE	-0.668768	7.16542	-5.41329	2.37466e-05	0.00276672	2.71084
TC0800009374.hg.1	CSMD1	CUB and Sushi multiple domains 1	ENSG00000183117	64478	FALSE	-0.382087	8.0252	-5.40421	2.42499e-05	0.00280627	2.69045
TC0200009005.hg.1	DPP10	dipeptidyl peptidase like 10	ENSG00000175497	57628	FALSE	0.714269	4.73203	5.40021	2.44751e-05	0.00281332	2.68146
TC0100015805.hg.1	CELF3	CUGBP Elav-like family member 3	ENSG00000159409	11189	FALSE	0.619669	7.86064	5.38414	2.54007e-05	0.00288944	2.64538
TC0300013520.hg.1	CLDN1	claudin 1	ENSG00000163347	9076	FALSE	0.542297	6.25868	5.38289	2.54747e-05	0.00288944	2.64255
TC1100007453.hg.1	MDK	midkine	ENSG00000110492	4192	FALSE	-0.311257	9.90847	-5.37796	2.57668e-05	0.00289151	2.63147
TC0900010570.hg.1	FRMD3	FERM domain containing 3	ENSG00000172159	257019	FALSE	0.46973	7.24965	5.37689	2.58306e-05	0.00289151	2.62906
TC2100006909.hg.1	HUNK	hormonally up-regulated Neu-associated kinase	ENSG00000142149	30811	FALSE	-0.428884	8.83404	-5.34935	2.75304e-05	0.00306178	2.56711
TC0100013445.hg.1	IFI6	interferon alpha inducible protein 6	ENSG00000126709	2537	FALSE	-0.409051	7.97871	-5.34337	2.79137e-05	0.00307446	2.55367
TC0800008300.hg.1	CPQ	carboxypeptidase Q	ENSG00000104324	10404	FALSE	0.548748	6.25993	5.34199	2.80035e-05	0.00307446	2.55054
TC1200010145.hg.1	BCAT1	branched chain amino acid transaminase 1	ENSG00000060982	586	FALSE	-0.527801	7.32938	-5.32944	2.88296e-05	0.003145	2.52228
TC1800007340.hg.1	DCC	DCC netrin 1 receptor	ENSG00000187323	1630	FALSE	0.415615	7.00838	5.32619	2.90473e-05	0.00314869	2.51497
TC0100017018.hg.1	ETNK2	ethanolamine kinase 2	ENSG00000143845	55224	FALSE	-0.905954	5.42917	-5.31516	2.97999e-05	0.00320996	2.4901
TC0700010965.hg.1	IGFBP3	insulin like growth factor binding protein 3	ENSG00000146674	3486	FALSE	0.337164	9.28396	5.28954	3.16246e-05	0.00338521	2.43233
TC0700008582.hg.1	SERPINE1	serpin family E member 1	ENSG00000106366	5054	FALSE	0.34799	7.25386	5.28065	3.2284e-05	0.00343434	2.41227
TC1800008952.hg.1	DSEL	dermatan sulfate epimerase like	ENSG00000171451	92126	TRUE	-0.519641	7.44399	-5.27424	3.27681e-05	0.00346431	2.39781
TC0X00007767.hg.1	POU3F4	POU class 3 homeobox 4	ENSG00000196767	5456	FALSE	0.397747	7.55696	5.25346	3.43885e-05	0.00361332	2.35089
TC0100016121.hg.1	KCNJ10	potassium inwardly rectifying channel subfamily J member 10	ENSG00000177807	3766	FALSE	0.424814	7.6792	5.24625	3.49692e-05	0.00363779	2.33461
TC1200012634.hg.1	KRT7	keratin 7	ENSG00000135480	3855	FALSE	-0.846807	6.33289	-5.24531	3.50461e-05	0.00363779	2.33247
TC0X00010516.hg.1	DCX	doublecortin	ENSG00000077279	1641	FALSE	0.279244	10.9012	5.23453	3.59352e-05	0.0037076	2.30812
TC1400009066.hg.1	MIS18BP1	MIS18 binding protein 1	ENSG00000129534	55320	FALSE	-0.773524	6.21127	-5.2255	3.66985e-05	0.00376368	2.28769
TC1000011720.hg.1	CALHM3	calcium homeostasis modulator 3	ENSG00000183128	119395	FALSE	0.609325	4.33424	5.22037	3.71388e-05	0.00376734	2.2761
TC2200007032.hg.1	CABP7	calcium binding protein 7	ENSG00000100314	164633	FALSE	-0.701985	5.54857	-5.21833	3.73158e-05	0.00376734	2.27148
TC0500007349.hg.1	ISL1	ISL LIM homeobox 1	ENSG00000016082	3670	FALSE	0.764633	6.07487	5.21528	3.7582e-05	0.00376734	2.26457
TC0900011192.hg.1	LPAR1	lysophosphatidic acid receptor 1	ENSG00000198121	1902	FALSE	0.642768	7.09703	5.21491	3.7614e-05	0.00376734	2.26375
TC1200007596.hg.1	GPD1	glycerol-3-phosphate dehydrogenase 1	ENSG00000167588	2819	FALSE	0.389114	7.8289	5.16169	4.25786e-05	0.00423979	2.14325
TC0300006446.hg.1	CNTN6	contactin 6	ENSG00000134115	27255	FALSE	-0.870063	5.19972	-5.13829	4.49676e-05	0.00445179	2.0902
TC0100015822.hg.1	S100A11	S100 calcium binding protein A11	ENSG00000163191	6282	FALSE	-0.47415	8.82725	-5.12253	4.66533e-05	0.0045703	2.05444
TC1800008348.hg.1	AQP4	aquaporin 4	ENSG00000171885	361	FALSE	0.362711	10.1293	5.12212	4.66983e-05	0.0045703	2.0535
TC1000007461.hg.1	RASSF4	Ras association domain family member 4	ENSG00000107551	83937	FALSE	-0.448739	8.61117	-5.10604	4.84855e-05	0.00470426	2.01701
TC1700008635.hg.1	RGS9	regulator of G protein signaling 9	ENSG00000108370	8787	FALSE	1.09035	4.76591	5.10488	4.86165e-05	0.00470426	2.01438
TC0500010835.hg.1	PLK2	polo like kinase 2	ENSG00000145632	10769	FALSE	-0.543343	7.51259	-5.09831	4.9369e-05	0.00475024	1.99946
TC1000007934.hg.1	ADAMTS14	ADAM metallopeptidase with thrombospondin type 1 motif 14	ENSG00000138316	140766	FALSE	-0.649236	6.19775	-5.08507	5.09206e-05	0.00487216	1.96939
TC1600010854.hg.1	CLEC18B	C-type lectin domain family 18 member B	ENSG00000140839	497190	FALSE	-0.415904	7.67092	-5.07048	5.26889e-05	0.00501335	1.93622
TC0100014276.hg.1	DHCR24	24-dehydrocholesterol reductase	ENSG00000116133	1718	FALSE	0.25354	10.3572	5.04308	5.6178e-05	0.00530231	1.87392
TC0400007520.hg.1	RASL11B	RAS like family 11 member B	ENSG00000128045	65997	FALSE	-0.811004	5.41737	-5.04181	5.6345e-05	0.00530231	1.87104
TC0800008080.hg.1	FABP5	fatty acid binding protein 5	ENSG00000164687	2171	FALSE	-0.380336	8.68996	-5.03558	5.71733e-05	0.00535086	1.85686
TC1500010864.hg.1	GATM	glycine amidinotransferase	ENSG00000171766	2628	FALSE	0.945556	5.52299	5.029	5.80608e-05	0.00540439	1.8419
TC1600006537.hg.1	BAIAP3	BAI1 associated protein 3	ENSG00000007516	8938	FALSE	0.51834	7.10654	5.02264	5.89327e-05	0.0054559	1.82742
TC1200012267.hg.1	SBNO1	strawberry notch homolog 1	ENSG00000139697	55206	TRUE	-0.374828	7.54217	-5.01684	5.97391e-05	0.00550082	1.81421
TC0200015958.hg.1	DNER	delta/notch like EGF repeat containing	ENSG00000187957	92737	FALSE	0.613114	6.57441	4.99996	6.21504e-05	0.00567194	1.77577
TC0200014361.hg.1	LYPD1	LY6/PLAUR domain containing 1	ENSG00000150551	116372	FALSE	-0.323473	8.48687	-4.99921	6.22599e-05	0.00567194	1.77407
TC1500010723.hg.1	CHAC1	ChaC glutathione specific gamma-glutamylcyclotransferase 1	ENSG00000128965	79094	FALSE	-0.477525	5.94121	-4.99618	6.27034e-05	0.00568213	1.76717
TC0600007854.hg.1	PI16	peptidase inhibitor 16	ENSG00000164530	221476	FALSE	0.672621	5.28527	4.98558	6.42818e-05	0.00578325	1.74302
TC0400011732.hg.1	NDNF	neuron derived neurotrophic factor	ENSG00000173376	79625	FALSE	-0.714999	5.93696	-4.98417	6.44947e-05	0.00578325	1.73981
TC0100008594.hg.1	ROR1	receptor tyrosine kinase like orphan receptor 1	ENSG00000185483	4919	FALSE	0.732979	6.13443	4.96385	6.76444e-05	0.00603409	1.6935
TC1100011176.hg.1	NRXN2	neurexin 2	ENSG00000110076	9379	FALSE	0.438362	7.35874	4.94104	7.13655e-05	0.00633304	1.64149
TC2100007872.hg.1	GRIK1	glutamate ionotropic receptor kainate type subunit 1	ENSG00000171189	2897	FALSE	0.427498	8.29913	4.93495	7.23947e-05	0.00639126	1.62758
TC0700010671.hg.1	PDE1C	phosphodiesterase 1C	ENSG00000154678	5137	FALSE	0.263858	9.99881	4.91988	7.50036e-05	0.00658762	1.5932
TC0200014735.hg.1	RBMS1	RNA binding motif single stranded interacting protein 1	ENSG00000153250	5937	TRUE	-0.980126	4.95548	-4.91309	7.6211e-05	0.00665952	1.57769
TC0800011334.hg.1	KLF10	Kruppel like factor 10	ENSG00000155090	7071	FALSE	-0.368751	7.73792	-4.89824	7.89188e-05	0.00686113	1.54379
TC0900009711.hg.1	IFNE	interferon epsilon	ENSG00000184995	338376	TRUE	-0.959992	4.41873	-4.89404	7.97014e-05	0.00689417	1.53421
TC1700011653.hg.1	SDK2	sidekick cell adhesion molecule 2	ENSG00000069188	54549	FALSE	0.316892	7.67488	4.88947	8.05639e-05	0.00693376	1.52376
TC1700012184.hg.1	CHRNB1	cholinergic receptor nicotinic beta 1 subunit	ENSG00000170175	1140	TRUE	-0.792912	5.30123	-4.8863	8.11665e-05	0.00695069	1.51652
TC1300006979.hg.1	RGCC	regulator of cell cycle	ENSG00000102760	28984	FALSE	0.478053	6.10548	4.87962	8.24518e-05	0.00702563	1.50127
TC2000006852.hg.1	SLC24A3	solute carrier family 24 member 3	ENSG00000185052	57419	FALSE	0.618565	5.47011	4.84949	8.85125e-05	0.00750472	1.43241
TC0500008125.hg.1	RHOBTB3	Rho related BTB domain containing 3	ENSG00000164292	22836	FALSE	-0.347941	7.84497	-4.84231	9.00213e-05	0.00757866	1.416
TC0300013877.hg.1	EPHB1	EPH receptor B1	ENSG00000154928	2047	FALSE	0.585937	6.2669	4.84114	9.02696e-05	0.00757866	1.41333
TC0600013936.hg.1	LINC02487	long intergenic non-protein coding RNA 2487	ENSG00000203688	441178	FALSE	-0.831416	5.41017	-4.83675	9.1207e-05	0.00762001	1.4033
TC0500013247.hg.1	PCDHB14	protocadherin beta 14	ENSG00000120327	56122	FALSE	-0.501547	7.44919	-4.82489	9.37932e-05	0.00779804	1.37616
TC1600007103.hg.1	CLEC19A	C-type lectin domain containing 19A	ENSG00000261210	728276	FALSE	-0.515202	5.44913	-4.77961	0.000104361	0.00863473	1.27254
TC0100018555.hg.1	LEMD1	LEM domain containing 1	ENSG00000186007	93273	FALSE	0.418376	8.06495	4.777	0.000105004	0.00864618	1.26658
TC0100010243.hg.1	PYHIN1	pyrin and HIN domain family member 1	ENSG00000163564	149628	FALSE	-0.616256	3.83534	-4.77053	0.00010662	0.00873719	1.25176
TC0X00011278.hg.1	PRRG1	proline rich and Gla domain 1	ENSG00000130962	5638	FALSE	-0.486263	6.19091	-4.76062	0.000109143	0.0088353	1.22906
TC1700010856.hg.1	C1QL1	complement C1q like 1	ENSG00000131094	10882	FALSE	-0.306975	10.5538	-4.76002	0.000109298	0.0088353	1.22769
TC1900008584.hg.1	MYBPC2	myosin binding protein C2	ENSG00000086967	4606	FALSE	-0.683494	4.1407	-4.75976	0.000109364	0.0088353	1.2271
TC1100006911.hg.1	SPON1	spondin 1	ENSG00000262655	10418	FALSE	0.649877	4.97581	4.73235	0.000116675	0.00935579	1.16432
TC0100007295.hg.1	EPHB2	EPH receptor B2	ENSG00000133216	2048	FALSE	-0.41442	9.18821	-4.73154	0.0001169	0.00935579	1.16245
TC0100008517.hg.1	NFIA	nuclear factor I A	ENSG00000162599	4774	FALSE	0.293099	10.0127	4.72799	0.000117883	0.00939064	1.15432
TC0800009796.hg.1	LZTS1	leucine zipper tumor suppressor 1	ENSG00000061337	11178	FALSE	-0.270139	7.90002	-4.72272	0.000119359	0.00941612	1.14225
TC0200011023.hg.1	SP100	SP100 nuclear antigen	ENSG00000067066	6672	FALSE	-0.94002	6.16214	-4.72238	0.000119457	0.00941612	1.14146
TC0X00006791.hg.1	PTCHD1	patched domain containing 1	ENSG00000165186	139411	FALSE	-0.717527	5.22894	-4.72098	0.000119852	0.00941612	1.13825
TC0800012457.hg.1	TMEM65	transmembrane protein 65	ENSG00000164983	157378	FALSE	-0.360564	8.36228	-4.71698	0.000120989	0.009462	1.12909
TC0X00010525.hg.1	TRPC5	transient receptor potential cation channel subfamily C member 5	ENSG00000072315	7224	FALSE	0.868407	4.89469	4.70808	0.000123562	0.00961928	1.10868
TC0800007888.hg.1	C8orf34	chromosome 8 open reading frame 34	ENSG00000165084	116328	FALSE	0.658327	4.06554	4.69722	0.000126774	0.00982467	1.08379
TC1300006594.hg.1	TNFRSF19	TNF receptor superfamily member 19	ENSG00000127863	55504	FALSE	-0.698302	7.01892	-4.68778	0.000129633	0.010001	1.06216
TC1500008995.hg.1	GOLGA8B	golgin A8 family member B	ENSG00000215252	440270	TRUE	0.399759	7.40089	4.68287	0.000131148	0.0100602	1.05089
TC1800006757.hg.1	LDLRAD4	low density lipoprotein receptor class A domain containing 4	ENSG00000168675	753	FALSE	-0.464488	9.03351	-4.68044	0.000131903	0.0100602	1.04533
TC0X00008108.hg.1	TMEM164	transmembrane protein 164	ENSG00000157600	84187	FALSE	-0.643927	6.16712	-4.67961	0.000132163	0.0100602	1.04342
TC0X00009576.hg.1	SYN1	synapsin I	ENSG00000008056	6853	FALSE	0.679904	5.74533	4.67623	0.000133221	0.0100959	1.03568
TC1200008597.hg.1	GAS2L3	growth arrest specific 2 like 3	ENSG00000139354	283431	FALSE	-0.321001	9.83799	-4.65351	0.000140579	0.0106066	0.983551
TC0100010543.hg.1	ATP1B1	ATPase Na+/K+ transporting subunit beta 1	ENSG00000143153	481	FALSE	0.290144	9.93994	4.6499	0.000141782	0.0106355	0.975284
TC0100018349.hg.1	CNIH3	cornichon family AMPA receptor auxiliary protein 3	ENSG00000143786	149111	FALSE	0.527568	8.24919	4.64865	0.000142204	0.0106355	0.972405
TC0200006936.hg.1	KLHL29	kelch like family member 29	ENSG00000119771	114818	FALSE	0.814225	4.8529	4.64431	0.000143669	0.0106984	0.962463
TC0100010218.hg.1	KIRREL1	kirre like nephrin family adhesion molecule 1	ENSG00000183853	55243	FALSE	-0.312438	8.75094	-4.63759	0.000145975	0.010823	0.94703
TC0200015002.hg.1	CHN1	chimerin 1	ENSG00000128656	1123	FALSE	-0.290043	10.0623	-4.63427	0.000147123	0.0108611	0.939429
TC0600007862.hg.1	PIM1	Pim-1 proto-oncogene, serine/threonine kinase	ENSG00000137193	5292	FALSE	-0.52331	6.62971	-4.62902	0.000148964	0.0109498	0.927374
TC1500008757.hg.1	ATP10A	ATPase phospholipid transporting 10A (putative)	ENSG00000206190	57194	FALSE	0.45834	6.71101	4.60628	0.000157205	0.0115062	0.875177
TC1700008673.hg.1	CACNG5	calcium voltage-gated channel auxiliary subunit gamma 5	ENSG00000075429	27091	FALSE	-0.28257	9.86953	-4.59421	0.000161763	0.0117343	0.847473
TC1700007520.hg.1	CDK5R1	cyclin dependent kinase 5 regulatory subunit 1	ENSG00000176749	8851	FALSE	0.44086	8.30151	4.5939	0.00016188	0.0117343	0.846776
TC0600012040.hg.1	TRAM2	translocation associated membrane protein 2	ENSG00000065308	9697	FALSE	-0.28587	10.5332	-4.59261	0.000162376	0.0117343	0.843805
TC1100009406.hg.1	HEPN1	hepatocellular carcinoma, down-regulated 1	ENSG00000221932	641654	FALSE	0.499141	6.25283	4.58868	0.000163894	0.0117941	0.834791
TC2000009809.hg.1	KCNQ2	potassium voltage-gated channel subfamily Q member 2	ENSG00000075043	3785	TRUE	0.288428	9.86506	4.58536	0.000165187	0.0118375	0.827175
TC0800009905.hg.1	NEFL	neurofilament light chain	ENSG00000277586	4747	FALSE	-0.730788	6.17164	-4.5811	0.000166864	0.0119078	0.817383
TC1300009271.hg.1	TBC1D4	TBC1 domain family member 4	ENSG00000136111	9882	FALSE	0.434305	6.09526	4.57653	0.000168679	0.0119874	0.806901
TC0900012139.hg.1	PGM5	phosphoglucomutase 5	ENSG00000154330	5239	FALSE	0.467739	6.32825	4.57342	0.000169929	0.0120264	0.799743
TC0100013267.hg.1	LUZP1	leucine zipper protein 1	ENSG00000169641	7798	FALSE	-0.368609	8.65952	-4.5712	0.000170825	0.01204	0.794648
TC1200009834.hg.1	MFAP5	microfibril associated protein 5	ENSG00000197614	8076	FALSE	0.374582	6.82729	4.56887	0.000171769	0.0120569	0.789306
TC0800009143.hg.1	ADGRB1	adhesion G protein-coupled receptor B1	ENSG00000181790	575	FALSE	0.487817	7.41291	4.56177	0.000174683	0.0122114	0.773007
TC1000010758.hg.1	RTKN2	rhotekin 2	ENSG00000182010	219790	FALSE	-0.468402	7.34819	-4.55187	0.000178829	0.0124298	0.750279
TC2000008915.hg.1	AHCY	adenosylhomocysteinase	ENSG00000101444	191	FALSE	0.311106	7.05811	4.55086	0.000179259	0.0124298	0.747952
TC0100016794.hg.1	B3GALT2	beta-1,3-galactosyltransferase 2	ENSG00000162630	8707	FALSE	-0.425082	7.32416	-4.53717	0.000185173	0.0127881	0.716503
TC0X00010434.hg.1	SLC25A53	solute carrier family 25 member 53	ENSG00000269743	401612	FALSE	0.411493	6.16537	4.53213	0.000187397	0.0128897	0.704938
TC1500007814.hg.1	NEO1	neogenin 1	ENSG00000067141	4756	FALSE	0.364947	8.98542	4.52942	0.000188607	0.0129211	0.698699
TC2100006922.hg.1	EVA1C	eva-1 homolog C	ENSG00000166979	59271	FALSE	-0.288194	8.45153	-4.52514	0.000190528	0.0129922	0.688883
TC1600009349.hg.1	GRIN2A	glutamate ionotropic receptor NMDA type subunit 2A	ENSG00000183454	2903	FALSE	0.499666	6.72642	4.5229	0.000191542	0.0129922	0.683743
TC0100017043.hg.1	LRRN2	leucine rich repeat neuronal 2	ENSG00000170382	10446	FALSE	0.483449	6.8957	4.52094	0.000192435	0.0129922	0.679236
TC1700008082.hg.1	MAPT	microtubule associated protein tau	ENSG00000186868	4137	TRUE	0.357789	8.61911	4.52041	0.000192679	0.0129922	0.678008
TC0700007925.hg.1	GALNT17	polypeptide N-acetylgalactosaminyltransferase 17	ENSG00000185274	64409	FALSE	0.344003	8.96258	4.51305	0.000196072	0.0131435	0.661098
TC1900006977.hg.1	ICAM1	intercellular adhesion molecule 1	ENSG00000090339	3383	FALSE	-0.337708	6.96298	-4.51222	0.000196458	0.0131435	0.659195
TC1000009851.hg.1	FRMD4A	FERM domain containing 4A	ENSG00000151474	55691	FALSE	-0.30897	10.1955	-4.50215	0.000201204	0.0133821	0.636076
TC0400008664.hg.1	PLK4	polo like kinase 4	ENSG00000142731	10733	FALSE	-0.794792	7.63805	-4.50135	0.000201587	0.0133821	0.634236
TC1100012698.hg.1	HEPACAM	hepatic and glial cell adhesion molecule	ENSG00000165478	220296	FALSE	0.471294	7.3217	4.48146	0.000211329	0.0139747	0.588527
TC1600010656.hg.1	CENPT	centromere protein T	ENSG00000102901	80152	FALSE	-0.372671	7.58036	-4.47416	0.000215021	0.0141462	0.571759
TC1600006888.hg.1	CIITA	class II major histocompatibility complex transactivator	ENSG00000179583	4261	FALSE	-0.680393	6.43388	-4.47307	0.000215576	0.0141462	0.569262
TC0900010352.hg.1	PTAR1	protein prenyltransferase alpha subunit repeat containing 1	ENSG00000188647	375743	FALSE	-0.367419	9.59778	-4.46377	0.000220387	0.0144068	0.54789
TC0100016539.hg.1	ANGPTL1	angiopoietin like 1	ENSG00000116194	9068	FALSE	-0.306376	7.59273	-4.46214	0.000221242	0.0144077	0.54414
TC1800008349.hg.1	CHST9	carbohydrate sulfotransferase 9	ENSG00000154080	83539	FALSE	0.644756	5.912	4.4397	0.000233345	0.0151383	0.492582
TC0700010770.hg.1	SFRP4	secreted frizzled related protein 4	ENSG00000106483	6424	FALSE	0.245999	10.3827	4.43238	0.000237436	0.0152905	0.47576
TC2000008253.hg.1	ADRA1D	adrenoceptor alpha 1D	ENSG00000171873	146	FALSE	-0.580301	5.71499	-4.4323	0.000237477	0.0152905	0.475591
TC0200014382.hg.1	TMEM163	transmembrane protein 163	ENSG00000152128	81615	FALSE	0.333945	8.25006	4.43002	0.000238769	0.0153161	0.470339
TC1100008994.hg.1	C11orf87	chromosome 11 open reading frame 87	ENSG00000185742	399947	FALSE	0.889462	5.63358	4.42123	0.000243802	0.0155806	0.450152
TC0600008632.hg.1	BCKDHB	branched chain keto acid dehydrogenase E1 subunit beta	ENSG00000083123	594	FALSE	0.425041	7.4574	4.4148	0.000247553	0.0157615	0.435375
TC1200012424.hg.1	TMEM132D	transmembrane protein 132D	ENSG00000151952	121256	FALSE	-0.68736	5.81122	-4.41082	0.000249908	0.0158525	0.426213
TC0200014775.hg.1	KCNH7	potassium voltage-gated channel subfamily H member 7	ENSG00000184611	90134	FALSE	0.808282	5.64803	4.40388	0.000254056	0.0160562	0.410281
TC0500013301.hg.1	DAB2	DAB adaptor protein 2	ENSG00000153071	1601	FALSE	-0.423075	6.26464	-4.39839	0.000257389	0.016207	0.397672
TC0700007098.hg.1	GARS1	glycyl-tRNA synthetase 1	ENSG00000106105	2617	FALSE	-0.254279	10.5197	-4.39031	0.000262375	0.0164604	0.379105
TC0700007996.hg.1	ELN	elastin	ENSG00000049540	2006	FALSE	-0.467359	7.29482	-4.38763	0.000264055	0.0165054	0.372931
TC0700011603.hg.1	MAGI2	membrane associated guanylate kinase, WW and PDZ domain containing 2	ENSG00000187391	9863	FALSE	-0.281438	9.2302	-4.38383	0.000266448	0.0165944	0.364204
TC1400008746.hg.1	TINF2	TERF1 interacting nuclear factor 2	ENSG00000092330	26277	TRUE	-0.254538	8.09	-4.37791	0.00027022	0.0167684	0.350602
TC0700009770.hg.1	DPP6	dipeptidyl peptidase like 6	ENSG00000130226	1804	FALSE	0.479021	6.95592	4.37376	0.000272899	0.0168734	0.341059
TC1500010072.hg.1	SIN3A	SIN3 transcription regulator family member A	ENSG00000169375	25942	FALSE	-0.308644	10.1874	-4.35863	0.000282884	0.0174279	0.306302
TC0200012713.hg.1	BCL11A	BAF chromatin remodeling complex subunit BCL11A	ENSG00000119866	53335	FALSE	0.328903	9.25226	4.33688	0.000297885	0.0182863	0.256331
TC1100008886.hg.1	ARHGAP42	Rho GTPase activating protein 42	ENSG00000165895	143872	FALSE	-0.852151	4.44552	-4.33279	0.000300795	0.018399	0.24693
TC1200012597.hg.1	MGST1	microsomal glutathione S-transferase 1	ENSG00000008394	4257	FALSE	-1.00138	4.1467	-4.3292	0.000303376	0.0184841	0.23867
TC2200007068.hg.1	SLC35E4	solute carrier family 35 member E4	ENSG00000100036	339665	FALSE	-0.430179	6.63157	-4.32786	0.000304345	0.0184841	0.235585
TC0100017145.hg.1	PLXNA2	plexin A2	ENSG00000076356	5362	FALSE	-0.342182	8.73536	-4.3247	0.000306635	0.0185574	0.228338
TC0800008940.hg.1	PHF20L1	PHD finger protein 20 like 1	ENSG00000129292	51105	FALSE	-0.282485	8.95522	-4.32149	0.000308987	0.0186339	0.22095
TC0100008664.hg.1	GADD45A	growth arrest and DNA damage inducible alpha	ENSG00000116717	1647	FALSE	-0.424395	8.14733	-4.30129	0.000324177	0.0194541	0.174558
TC1600011378.hg.1	MVP	major vault protein	ENSG00000013364	9961	TRUE	-0.549829	8.32511	-4.30041	0.000324861	0.0194541	0.172521
TC0400011180.hg.1	SCD5	stearoyl-CoA desaturase 5	ENSG00000145284	79966	FALSE	0.314126	9.19494	4.2984	0.000326411	0.0194789	0.167919
TC0100012490.hg.1	FNDC10	fibronectin type III domain containing 10	ENSG00000228594	643988	FALSE	0.431541	6.46318	4.29259	0.000330951	0.0196812	0.154568
TC0100010281.hg.1	ATP1A2	ATPase Na+/K+ transporting subunit alpha 2	ENSG00000018625	477	FALSE	0.323354	9.34093	4.28353	0.000338155	0.0200401	0.133755
TC1500008772.hg.1	GABRB3	gamma-aminobutyric acid type A receptor subunit beta3	ENSG00000166206	2562	FALSE	0.319932	9.33298	4.2814	0.00033987	0.0200723	0.128866
TC1400008816.hg.1	PRKD1	protein kinase D1	ENSG00000184304	5587	FALSE	-0.30091	8.18732	-4.26301	0.000355058	0.0208414	0.0866226
TC0400012992.hg.1	MFAP3L	microfibril associated protein 3 like	ENSG00000198948	9848	FALSE	0.410006	6.41705	4.26269	0.000355327	0.0208414	0.0858899
TC0800009954.hg.1	STMN4	stathmin 4	ENSG00000015592	81551	FALSE	0.463164	6.71396	4.25628	0.000360788	0.0210875	0.0711563
TC0200008464.hg.1	KCNIP3	potassium voltage-gated channel interacting protein 3	ENSG00000115041	30818	FALSE	0.466032	6.16121	4.25488	0.000361985	0.0210875	0.0679558
TC0300012323.hg.1	MGLL	monoglyceride lipase	ENSG00000074416	11343	FALSE	0.51199	7.31942	4.24687	0.000368945	0.0213818	0.049557
TC0800009919.hg.1	GNRH1	gonadotropin releasing hormone 1	ENSG00000147437	2796	FALSE	-0.356264	7.71334	-4.2462	0.000369535	0.0213818	0.0480143
TC0100013709.hg.1	COL8A2	collagen type VIII alpha 2 chain	ENSG00000171812	1296	FALSE	0.489008	5.41739	4.24315	0.000372228	0.0214652	0.0409993
TC0300011455.hg.1	FRMD4B	FERM domain containing 4B	ENSG00000114541	23150	FALSE	0.691244	6.64615	4.23972	0.000375268	0.0215678	0.0331422
TC0500008941.hg.1	ARHGAP26	Rho GTPase activating protein 26	ENSG00000145819	23092	FALSE	0.501534	7.12343	4.22188	0.000391528	0.0223568	-0.00782526
TC0400011313.hg.1	SNCA	synuclein alpha	ENSG00000145335	6622	FALSE	0.319615	9.23107	4.2218	0.000391606	0.0223568	-0.00801633
TC1500008328.hg.1	BLM	BLM RecQ like helicase	ENSG00000197299	641	FALSE	0.433519	7.51015	4.21855	0.000394643	0.0224553	-0.0154768
TC0100011533.hg.1	ATF3	activating transcription factor 3	ENSG00000162772	467	FALSE	-0.344098	7.08821	-4.21115	0.000401647	0.0227782	-0.0324637
TC0300013736.hg.1	DLG1	discs large MAGUK scaffold protein 1	ENSG00000075711	1739	FALSE	-0.248641	9.58568	-4.19121	0.000421151	0.0238055	-0.0782443
TC1000007833.hg.1	LRRTM3	leucine rich repeat transmembrane neuronal 3	ENSG00000198739	347731	FALSE	0.396649	8.76485	4.18683	0.000425557	0.023917	-0.0882908
TC0200006725.hg.1	GREB1	growth regulating estrogen receptor binding 1	ENSG00000196208	9687	FALSE	0.385161	6.88124	4.18618	0.00042621	0.023917	-0.0897707
TC1400006723.hg.1	REC8	REC8 meiotic recombination protein	ENSG00000100918	9985	TRUE	0.485692	6.56436	4.1851	0.000427313	0.023917	-0.0922666
TC0600007480.hg.1	HLA-F	major histocompatibility complex, class I, F	ENSG00000204642	3134	TRUE	-0.332291	7.98955	-4.17444	0.000438281	0.0244509	-0.116727
TC1400008588.hg.1	TEP1	telomerase associated protein 1	ENSG00000129566	7011	FALSE	-0.431745	7.71386	-4.16697	0.00044613	0.024808	-0.133857
TC0600008873.hg.1	UFL1	UFM1 specific ligase 1	ENSG00000014123	23376	FALSE	-0.776174	6.60419	-4.15977	0.000453836	0.0251548	-0.150384
TC1500008988.hg.1	GOLGA8A	golgin A8 family member A	ENSG00000175265	23015	TRUE	0.359568	7.66567	4.15782	0.000455949	0.0251686	-0.154865
TC0400006639.hg.1	NSG1	neuronal vesicle trafficking associated 1	ENSG00000168824	27065	FALSE	0.508854	7.49644	4.15555	0.000458406	0.0251686	-0.160052
TC1400008034.hg.1	UNC79	unc-79 homolog, NALCN channel complex subunit	ENSG00000133958	57578	TRUE	0.528587	6.08298	4.15484	0.00045919	0.0251686	-0.1617
TC0X00007378.hg.1	MAGEH1	MAGE family member H1	ENSG00000187601	28986	FALSE	0.335218	7.61585	4.15322	0.000460961	0.0251686	-0.165415
TC0100018367.hg.1	CHRM3	cholinergic receptor muscarinic 3	ENSG00000133019	1131	FALSE	-0.501531	6.4538	-4.15216	0.000462125	0.0251686	-0.167848
TC1000008973.hg.1	TDRD1	tudor domain containing 1	ENSG00000095627	56165	FALSE	-0.907689	3.58725	-4.15145	0.000462901	0.0251686	-0.169467
TC0600011971.hg.1	PTCHD4	patched domain containing 4	ENSG00000244694	442213	FALSE	-0.478997	6.57587	-4.14486	0.000470211	0.0254287	-0.184583
TC0600008972.hg.1	PRDM1	PR/SET domain 1	ENSG00000057657	639	FALSE	-0.476114	6.97652	-4.14446	0.000470654	0.0254287	-0.185493
TC0500013423.hg.1	HNRNPH1	heterogeneous nuclear ribonucleoprotein H1	ENSG00000169045	3187	TRUE	0.296942	9.16245	4.14171	0.000473742	0.025515	-0.191801
TC2000009149.hg.1	PTPRT	protein tyrosine phosphatase receptor type T	ENSG00000196090	11122	FALSE	0.385838	6.48658	4.13691	0.000479188	0.0257274	-0.202827
TC0100012921.hg.1	DHRS3	dehydrogenase/reductase 3	ENSG00000162496	9249	TRUE	-0.492373	5.4067	-4.12991	0.000487221	0.0260186	-0.218864
TC0100010648.hg.1	PRDX6	peroxiredoxin 6	ENSG00000117592	9588	FALSE	0.354651	9.41732	4.12954	0.00048765	0.0260186	-0.219712
TC0500009141.hg.1	GRIA1	glutamate ionotropic receptor AMPA type subunit 1	ENSG00000155511	2890	FALSE	0.288993	9.47413	4.12704	0.000490555	0.0260923	-0.225442
TC1700008844.hg.1	TTYH2	tweety family member 2	ENSG00000141540	94015	FALSE	0.307289	9.33684	4.12456	0.000493459	0.0261318	-0.231136
TC1900011704.hg.1	ZNF536	zinc finger protein 536	ENSG00000198597	9745	FALSE	0.570037	4.43023	4.1238	0.000494348	0.0261318	-0.232871
TC0500008175.hg.1	RGMB	repulsive guidance molecule BMP co-receptor b	ENSG00000174136	285704	FALSE	0.286886	8.44343	4.11549	0.000504212	0.0265545	-0.251925
TC0600013852.hg.1	C6orf118	chromosome 6 open reading frame 118	ENSG00000112539	168090	FALSE	0.52093	7.18081	4.11447	0.000505446	0.0265545	-0.254284
TC0700011876.hg.1	ASNS	asparagine synthetase (glutamine-hydrolyzing)	ENSG00000070669	440	FALSE	-0.604021	7.22439	-4.11157	0.000508937	0.026597	-0.26092
TC1000010022.hg.1	PIP4K2A	phosphatidylinositol-5-phosphate 4-kinase type 2 alpha	ENSG00000150867	5305	FALSE	-0.254672	10.0256	-4.11122	0.00050936	0.026597	-0.261722
TC0500009185.hg.1	KIF4B	kinesin family member 4B	ENSG00000226650	285643	FALSE	0.534329	4.14201	4.10225	0.000520338	0.0270876	-0.282282
TC0100009837.hg.1	PDE4DIP	phosphodiesterase 4D interacting protein	ENSG00000178104	9659	TRUE	0.41954	6.85713	4.09568	0.000528525	0.0273996	-0.297335
TC0700008427.hg.1	DLX6	distal-less homeobox 6	ENSG00000006377	1750	FALSE	0.224884	9.53987	4.09488	0.000529531	0.0273996	-0.299168
TC0500011502.hg.1	ELL2	elongation factor for RNA polymerase II 2	ENSG00000118985	22936	FALSE	-0.518542	7.15456	-4.0914	0.000533939	0.0275445	-0.30716
TC2000010007.hg.1	RBM12	RNA binding motif protein 12	ENSG00000244462	10137	TRUE	0.279907	8.36938	4.08799	0.000538285	0.0276853	-0.314974
TC1600009865.hg.1	NUPR1	nuclear protein 1, transcriptional regulator	ENSG00000176046	26471	FALSE	-0.40159	7.07067	-4.08552	0.000541448	0.0277026	-0.320623
TC1400007154.hg.1	GNG2	G protein subunit gamma 2	ENSG00000186469	54331	FALSE	0.284513	8.78109	4.08521	0.000541856	0.0277026	-0.321349
TC0700007370.hg.1	AEBP1	AE binding protein 1	ENSG00000106624	165	TRUE	0.285376	9.09642	4.08252	0.000545328	0.0277971	-0.327507
TC0600014257.hg.1	HLA-C	major histocompatibility complex, class I, C	ENSG00000204525	3107	TRUE	-0.264281	9.40619	-4.08	0.000548607	0.0278307	-0.333284
TC1000012522.hg.1	BEND7	BEN domain containing 7	ENSG00000165626	222389	FALSE	-0.410828	7.25652	-4.07951	0.000549236	0.0278307	-0.33439
TC1400010704.hg.1	CRIP1	cysteine rich protein 1	ENSG00000213145	1396	FALSE	-0.484051	6.93186	-4.07539	0.000554646	0.0280219	-0.343836
TC1300009505.hg.1	ABCC4	ATP binding cassette subfamily C member 4	ENSG00000125257	10257	FALSE	-0.509473	5.40132	-4.07296	0.000557859	0.0280756	-0.349404
TC0400010750.hg.1	NMU	neuromedin U	ENSG00000109255	10874	FALSE	0.389969	6.59185	4.07211	0.000558987	0.0280756	-0.351351
TC1400010644.hg.1	SERPINA3	serpin family A member 3	ENSG00000196136	12	FALSE	-0.626554	6.18453	-4.07051	0.000561122	0.0280784	-0.355025
TC1700012183.hg.1	FGF11	fibroblast growth factor 11	ENSG00000161958	2256	TRUE	-0.301257	7.03665	-4.06961	0.000562322	0.0280784	-0.357083
TC1000011203.hg.1	ANXA11	annexin A11	ENSG00000122359	311	FALSE	0.318787	8.88493	4.06554	0.000567782	0.0282686	-0.366395
TC1700011687.hg.1	BTBD17	BTB domain containing 17	ENSG00000204347	388419	FALSE	0.556027	5.51617	4.05739	0.000578894	0.0286981	-0.385073
TC0600014258.hg.1	HLA-B	major histocompatibility complex, class I, B	ENSG00000234745	3106	TRUE	-0.283656	9.31485	-4.05676	0.000579759	0.0286981	-0.386511
TC1100012269.hg.1	ARHGAP20	Rho GTPase activating protein 20	ENSG00000137727	57569	FALSE	1.02492	3.79137	4.04995	0.000589218	0.0290823	-0.402105
TC1000008733.hg.1	MFSD13A	major facilitator superfamily domain containing 13A	ENSG00000138111	79847	FALSE	0.327543	6.59084	4.04583	0.000595014	0.0292839	-0.411535
TC1500008046.hg.1	CEMIP	cell migration inducing hyaluronidase 1	ENSG00000103888	57214	FALSE	-0.399292	6.7775	-4.03875	0.000605105	0.0296834	-0.427736
TC0700011066.hg.1	COBL	cordon-bleu WH2 repeat protein	ENSG00000106078	23242	FALSE	-0.240365	8.25248	-4.03762	0.000606735	0.0296834	-0.430328
TC1700006524.hg.1	SERPINF1	serpin family F member 1	ENSG00000132386	5176	TRUE	-0.705719	7.46066	-4.03652	0.00060833	0.0296834	-0.432857
TC2200007318.hg.1	H1-0	H1.0 linker histone	ENSG00000189060	3005	FALSE	-0.397978	8.25173	-4.03204	0.000614843	0.0298965	-0.443114
TC0900008811.hg.1	STXBP1	syntaxin binding protein 1	ENSG00000136854	6812	FALSE	0.231543	9.78136	4.03112	0.000616188	0.0298965	-0.44522
TC0600010040.hg.1	FNDC1	fibronectin type III domain containing 1	ENSG00000164694	84624	FALSE	0.851109	5.43947	4.02887	0.000619485	0.0299715	-0.45036
TC0300009122.hg.1	CPA3	carboxypeptidase A3	ENSG00000163751	1359	FALSE	-0.761974	4.02386	-4.02727	0.000621848	0.0300011	-0.454027
TC0X00007191.hg.1	EBP	EBP cholestenol delta-isomerase	ENSG00000147155	10682	FALSE	0.240463	9.28555	4.02224	0.000629317	0.0302761	-0.465525
TC0400011580.hg.1	CFI	complement factor I	ENSG00000205403	3426	FALSE	-0.312463	9.65934	-4.02027	0.000632281	0.0303335	-0.47005
TC0100010244.hg.1	IFI16	interferon gamma inducible protein 16	ENSG00000163565	3428	FALSE	-0.253597	10.2166	-4.01626	0.000638329	0.0305382	-0.479219
TC2200007495.hg.1	SREBF2	sterol regulatory element binding transcription factor 2	ENSG00000198911	6721	FALSE	0.25798	9.98341	4.01317	0.000643038	0.0306778	-0.486296
TC1900007096.hg.1	JUNB	JunB proto-oncogene, AP-1 transcription factor subunit	ENSG00000171223	3726	FALSE	-0.378218	6.00257	-4.0084	0.000650368	0.0309413	-0.49721
TC1100013080.hg.1	FOLH1B	folate hydrolase 1B	ENSG00000134612	219595	FALSE	-0.436165	5.79879	-4.00391	0.000657335	0.0311861	-0.507469
TC0400010258.hg.1	LGI2	leucine rich repeat LGI family member 2	ENSG00000153012	55203	FALSE	-0.725313	5.05472	-3.99957	0.000664155	0.0314226	-0.517407
TC1600011422.hg.1	CLEC18A	C-type lectin domain family 18 member A	ENSG00000157322	348174	FALSE	-0.338378	7.91138	-3.99406	0.000672901	0.0317487	-0.53
TC0200016433.hg.1	TMEM178A	transmembrane protein 178A	ENSG00000152154	130733	FALSE	-0.417991	7.49068	-3.98764	0.000683234	0.0321477	-0.544671
TC0400012641.hg.1	PDLIM3	PDZ and LIM domain 3	ENSG00000154553	27295	FALSE	0.521947	5.66571	3.97966	0.000696313	0.0326733	-0.562921
TC1500010422.hg.1	IDH2	isocitrate dehydrogenase (NADP(+)) 2	ENSG00000182054	3418	FALSE	0.225984	9.79218	3.97159	0.000709782	0.0332143	-0.581357
TC0200012936.hg.1	FBXO48	F-box protein 48	ENSG00000204923	554251	FALSE	0.580532	4.83286	3.96838	0.000715214	0.0333773	-0.588695
TC1300008858.hg.1	HTR2A	5-hydroxytryptamine receptor 2A	ENSG00000102468	3356	FALSE	-0.599442	4.28476	-3.96407	0.000722579	0.0336294	-0.598552
TC1400010715.hg.1	AJUBA	ajuba LIM protein	ENSG00000129474	84962	FALSE	-0.366801	9.63693	-3.96176	0.000726558	0.0337229	-0.603836
TC0200010165.hg.1	PPP1R1C	protein phosphatase 1 regulatory inhibitor subunit 1C	ENSG00000150722	151242	FALSE	0.327198	8.20635	3.95774	0.000733522	0.0338644	-0.613013
TC1100010531.hg.1	SLC1A2	solute carrier family 1 member 2	ENSG00000110436	6506	FALSE	0.331641	8.94609	3.95772	0.00073356	0.0338644	-0.613064
TC0700011797.hg.1	SAMD9L	sterile alpha motif domain containing 9 like	ENSG00000177409	219285	FALSE	-0.343838	7.63594	-3.95555	0.000737344	0.0338753	-0.618014
TC0800007899.hg.1	SULF1	sulfatase 1	ENSG00000137573	23213	FALSE	-0.647208	4.74455	-3.95532	0.000737753	0.0338753	-0.618548
TC1100007868.hg.1	GNG3	G protein subunit gamma 3	ENSG00000162188	2785	FALSE	0.254211	7.97281	3.95036	0.000746498	0.0341852	-0.629884
TC1000011904.hg.1	ABLIM1	actin binding LIM protein 1	ENSG00000099204	3983	FALSE	0.23881	10.668	3.94574	0.000754723	0.0344697	-0.640424
TC1500007518.hg.1	RAB8B	RAB8B, member RAS oncogene family	ENSG00000166128	51762	FALSE	-0.289173	8.96991	-3.94266	0.000760256	0.0346301	-0.64745
TC2000008381.hg.1	JAG1	jagged canonical Notch ligand 1	ENSG00000101384	182	FALSE	-0.367319	8.92512	-3.94035	0.000764444	0.034726	-0.652733
TC0600013962.hg.1	DACT2	dishevelled binding antagonist of beta catenin 2	ENSG00000164488	168002	FALSE	-0.371102	6.81773	-3.93926	0.000766418	0.034726	-0.655213
TC1200007804.hg.1	METTL7B	methyltransferase like 7B	ENSG00000170439	196410	FALSE	0.362147	8.29518	3.93534	0.000773589	0.0349585	-0.664171
TC0600014105.hg.1	C2	complement C2	ENSG00000166278	717	TRUE	-0.485823	6.21809	-3.93238	0.000779038	0.0351121	-0.670921
TC0200014204.hg.1	HS6ST1	heparan sulfate 6-O-sulfotransferase 1	ENSG00000136720	9394	FALSE	-0.405617	6.2799	-3.92556	0.000791761	0.0355896	-0.686499
TC0600006976.hg.1	PHACTR1	phosphatase and actin regulator 1	ENSG00000112137	221692	FALSE	0.621774	5.49999	3.92448	0.000793789	0.0355896	-0.688958
TC0200007048.hg.1	MAPRE3	microtubule associated protein RP/EB family member 3	ENSG00000084764	22924	FALSE	0.310654	7.53381	3.92239	0.000797731	0.0356729	-0.693721
TC1700010035.hg.1	SLC47A2	solute carrier family 47 member 2	ENSG00000180638	146802	FALSE	0.547573	5.9733	3.91891	0.000804364	0.0358759	-0.701683
TC0100007936.hg.1	MFSD2A	major facilitator superfamily domain containing 2A	ENSG00000168389	84879	FALSE	0.348574	8.6895	3.91566	0.000810594	0.0360598	-0.709101
TC1400009329.hg.1	RTN1	reticulon 1	ENSG00000139970	6252	FALSE	0.233612	10.8172	3.90798	0.000825498	0.0366277	-0.726617
TC2200008847.hg.1	CENPM	centromere protein M	ENSG00000100162	79019	FALSE	0.289866	7.84274	3.90594	0.000829497	0.03671	-0.731261
TC1500009641.hg.1	RORA	RAR related orphan receptor A	ENSG00000069667	6095	FALSE	0.51155	6.49389	3.89987	0.000841541	0.0371471	-0.745117
TC0100013028.hg.1	EPHA2	EPH receptor A2	ENSG00000142627	1969	FALSE	-0.284051	8.81516	-3.89781	0.000845652	0.0372326	-0.749802
TC1500008100.hg.1	WHAMM	WASP homolog associated with actin, golgi membranes and microtubules	ENSG00000156232	123720	FALSE	-0.462637	7.38484	-3.89387	0.000853598	0.0374861	-0.758789
TC1500007237.hg.1	SCG3	secretogranin III	ENSG00000104112	29106	FALSE	0.577163	7.24492	3.88751	0.000866571	0.0379585	-0.773285
TC1800007080.hg.1	GALNT1	polypeptide N-acetylgalactosaminyltransferase 1	ENSG00000141429	2589	FALSE	-0.565705	7.14293	-3.88633	0.000869004	0.0379679	-0.775979
TC1000007061.hg.1	GPR158	G protein-coupled receptor 158	ENSG00000151025	57512	FALSE	0.455541	6.94712	3.8809	0.000880269	0.0383623	-0.788355
TC2000007797.hg.1	DOK5	docking protein 5	ENSG00000101134	55816	FALSE	0.324502	8.95071	3.86357	0.000917203	0.0398704	-0.827839
TC1000010589.hg.1	VSTM4	V-set and transmembrane domain containing 4	ENSG00000165633	196740	FALSE	0.444319	7.0888	3.85943	0.000926249	0.040113	-0.837266
TC0100016199.hg.1	OLFML2B	olfactomedin like 2B	ENSG00000162745	25903	FALSE	-0.434666	6.17755	-3.85888	0.000927469	0.040113	-0.838529
TC0X00008785.hg.1	BGN	biglycan	ENSG00000182492	633	FALSE	-0.644808	5.99957	-3.85678	0.000932102	0.0402118	-0.843315
TC0100015864.hg.1	S100A6	S100 calcium binding protein A6	ENSG00000197956	6277	FALSE	-0.364016	8.1968	-3.85221	0.000942259	0.0405479	-0.853724
TC0700008181.hg.1	GNAI1	G protein subunit alpha i1	ENSG00000127955	2770	FALSE	0.365517	8.93255	3.85053	0.000946002	0.040607	-0.857531
TC0X00010329.hg.1	TSPAN6	tetraspanin 6	ENSG00000000003	7105	FALSE	0.223122	9.78162	3.84887	0.000949741	0.0406655	-0.861319
TC1600008139.hg.1	CES4A	carboxylesterase 4A	ENSG00000172824	283848	FALSE	0.54571	4.04226	3.84401	0.000960756	0.0410262	-0.872392
TC1600008498.hg.1	VAT1L	vesicle amine transport 1 like	ENSG00000171724	57687	FALSE	-0.381041	7.44413	-3.84304	0.000962956	0.0410262	-0.874587
TC0700010412.hg.1	SP8	Sp8 transcription factor	ENSG00000164651	221833	FALSE	0.321814	7.62872	3.82927	0.000994909	0.0422824	-0.905927
TC1100010055.hg.1	SCUBE2	signal peptide, CUB domain and EGF like domain containing 2	ENSG00000175356	57758	FALSE	-0.571889	5.88615	-3.8242	0.00100693	0.0425435	-0.917452
TC1000011574.hg.1	LOXL4	lysyl oxidase like 4	ENSG00000138131	84171	FALSE	-0.574716	5.62566	-3.82359	0.00100839	0.0425435	-0.918847
TC0800010224.hg.1	ZMAT4	zinc finger matrin-type 4	ENSG00000165061	79698	FALSE	-0.613279	4.57236	-3.82295	0.00100993	0.0425435	-0.920313
TC0X00006758.hg.1	CNKSR2	connector enhancer of kinase suppressor of Ras 2	ENSG00000149970	22866	FALSE	0.343874	7.95463	3.8225	0.00101099	0.0425435	-0.921316
TC0600007628.hg.1	C4B	complement C4B (Chido blood group)	ENSG00000224389	721	TRUE	-0.206326	10.1635	-3.81857	0.00102047	0.0427324	-0.930271
TC0600014108.hg.1	C4A	complement C4A (Rodgers blood group)	ENSG00000244731	720	TRUE	-0.206326	10.1635	-3.81857	0.00102047	0.0427324	-0.930271
TC0X00011355.hg.1	PIR	pirin	ENSG00000087842	8544	FALSE	0.519829	5.70728	3.8134	0.00103305	0.0431536	-0.942029
TC0100015598.hg.1	TXNIP	thioredoxin interacting protein	ENSG00000265972	10628	FALSE	-0.258239	10.3533	-3.80785	0.0010467	0.0436177	-0.954631
TC1000010727.hg.1	ANK3	ankyrin 3	ENSG00000151150	288	FALSE	-0.522905	6.86772	-3.80389	0.00105658	0.0439073	-0.963641
TC0100018242.hg.1	HS2ST1	heparan sulfate 2-O-sulfotransferase 1	ENSG00000153936	9653	FALSE	-0.300166	7.92879	-3.80301	0.00105878	0.0439073	-0.965638
TC1600008577.hg.1	BCO1	beta-carotene oxygenase 1	ENSG00000135697	53630	FALSE	-0.401666	5.20236	-3.80109	0.0010636	0.0440005	-0.969992
TC0500007826.hg.1	IQGAP2	IQ motif containing GTPase activating protein 2	ENSG00000145703	10788	FALSE	0.375916	5.28222	3.79711	0.00107368	0.0443106	-0.979044
TC0300011525.hg.1	RYBP	RING1 and YY1 binding protein	ENSG00000163602	23429	TRUE	0.215385	9.21203	3.79194	0.0010869	0.0447421	-0.990785
TC0200015678.hg.1	IGFBP5	insulin like growth factor binding protein 5	ENSG00000115461	3488	FALSE	0.331144	9.39594	3.79099	0.00108936	0.0447421	-0.992953
TC0200008566.hg.1	CNGA3	cyclic nucleotide gated channel subunit alpha 3	ENSG00000144191	1261	FALSE	0.226058	7.87878	3.78694	0.00109985	0.0450648	-1.00214
TC1100011122.hg.1	PLAAT5	phospholipase A and acyltransferase 5	ENSG00000168004	117245	FALSE	-0.731573	4.71976	-3.78448	0.00110627	0.0452199	-1.00773
TC2000006861.hg.1	RIN2	Ras and Rab interactor 2	ENSG00000132669	54453	FALSE	0.251577	8.64625	3.78019	0.00111758	0.0455734	-1.01748
TC0800008044.hg.1	STMN2	stathmin 2	ENSG00000104435	11075	FALSE	0.59841	4.36999	3.77844	0.00112221	0.0456533	-1.02144
TC0500007848.hg.1	PDE8B	phosphodiesterase 8B	ENSG00000113231	8622	TRUE	-0.414799	5.99573	-3.7761	0.00112845	0.0457985	-1.02676
TC2000009392.hg.1	B4GALT5	beta-1,4-galactosyltransferase 5	ENSG00000158470	9334	FALSE	-0.258039	8.6299	-3.77224	0.00113881	0.0461097	-1.03553
TC1400006739.hg.1	NFATC4	nuclear factor of activated T cells 4	ENSG00000100968	4776	TRUE	-0.351828	7.03184	-3.7652	0.00115795	0.0467741	-1.05151
TC2000009317.hg.1	SULF2	sulfatase 2	ENSG00000196562	55959	FALSE	-0.318124	7.9665	-3.75852	0.00117638	0.0474066	-1.06664
TC0900009905.hg.1	CNTFR	ciliary neurotrophic factor receptor	ENSG00000122756	1271	FALSE	0.213126	9.83779	3.75628	0.00118264	0.0475256	-1.07173
TC0800008324.hg.1	MATN2	matrilin 2	ENSG00000132561	4147	FALSE	0.392249	8.09856	3.75548	0.00118488	0.0475256	-1.07355
TC0300013988.hg.1	PCBP4	poly(rC) binding protein 4	ENSG00000090097	57060	FALSE	-0.218784	9.82799	-3.74499	0.00121466	0.0486063	-1.09734
TC1400009679.hg.1	FAM161B	FAM161 centrosomal protein B	ENSG00000156050	145483	FALSE	0.32633	6.5267	3.74172	0.00122408	0.0488692	-1.10474
TC1100006923.hg.1	PDE3B	phosphodiesterase 3B	ENSG00000152270	5140	FALSE	0.469357	6.21071	3.73258	0.00125083	0.049821	-1.12546
TC0X00009493.hg.1	EFHC2	EF-hand domain containing 2	ENSG00000183690	80258	FALSE	-0.593339	6.45802	-3.72845	0.00126313	0.0501939	-1.13483
TC1200008593.hg.1	SLC17A8	solute carrier family 17 member 8	ENSG00000179520	246213	FALSE	-0.610712	5.97901	-3.72661	0.00126863	0.0502957	-1.13899
TC0100018280.hg.1	LOC644634	uncharacterized LOC644634		644634	TRUE	0.362737	7.51951	3.72526	0.00127267	0.0503395	-1.14204
TC1100009657.hg.1	IFITM3	interferon induced transmembrane protein 3	ENSG00000142089	10410	FALSE	-0.227105	10.3481	-3.71933	0.00129065	0.0509187	-1.15547
TC1900007766.hg.1	LRP3	LDL receptor related protein 3	ENSG00000130881	4037	FALSE	0.408042	6.16572	3.71848	0.00129326	0.0509187	-1.15741
TC0X00008125.hg.1	PAK3	p21 (RAC1) activated kinase 3	ENSG00000077264	5063	FALSE	0.326291	8.80943	3.71626	0.00130004	0.0510685	-1.16242
TC1700007993.hg.1	RUNDC3A	RUN domain containing 3A	ENSG00000108309	10900	FALSE	0.321196	7.69179	3.71292	0.00131035	0.0513556	-1.16998
TC1200012719.hg.1	CFAP251	cilia and flagella associated protein 251	ENSG00000158023	144406	FALSE	-0.634478	5.41283	-3.70578	0.00133265	0.0521102	-1.18614
TC1500007097.hg.1	B2M	beta-2-microglobulin	ENSG00000166710	567	TRUE	-0.188128	10.7573	-3.70391	0.00133858	0.052127	-1.19039
TC0500011852.hg.1	LOX	lysyl oxidase	ENSG00000113083	4015	FALSE	-0.317353	7.55735	-3.70372	0.00133916	0.052127	-1.19081
TC1600009737.hg.1	GGA2	golgi associated, gamma adaptin ear containing, ARF binding protein 2	ENSG00000103365	23062	FALSE	-0.361375	8.48074	-3.70153	0.0013461	0.0522781	-1.19576
TC1200010901.hg.1	RNF41	ring finger protein 41	ENSG00000181852	10193	FALSE	-0.215021	8.8919	-3.69814	0.00135695	0.0525802	-1.20344
TC0500012340.hg.1	NR3C1	nuclear receptor subfamily 3 group C member 1	ENSG00000113580	2908	FALSE	-0.317228	7.9901	-3.69433	0.00136921	0.0528181	-1.21205
TC0800007995.hg.1	CRISPLD1	cysteine rich secretory protein LCCL domain containing 1	ENSG00000121005	83690	FALSE	0.289581	9.11827	3.69416	0.00136977	0.0528181	-1.21245
TC1100009169.hg.1	TAGLN	transgelin	ENSG00000149591	6876	FALSE	0.260117	10.9911	3.69336	0.00137234	0.0528181	-1.21424
TC1800006655.hg.1	TXNDC2	thioredoxin domain containing 2	ENSG00000168454	84203	FALSE	-0.420323	6.66801	-3.68922	0.00138585	0.0532184	-1.22362
TC1200009972.hg.1	GPR19	G protein-coupled receptor 19	ENSG00000183150	2842	FALSE	0.602406	5.19753	3.68686	0.00139357	0.0533953	-1.22894
TC1200012680.hg.1	ACSS3	acyl-CoA synthetase short chain family member 3	ENSG00000111058	79611	FALSE	-0.23771	8.71202	-3.68213	0.00140923	0.0538746	-1.23963
TC0400007830.hg.1	ALB	albumin	ENSG00000163631	213	FALSE	0.962861	5.5782	3.67438	0.00143526	0.0546365	-1.25715
TC0400006930.hg.1	CPEB2	cytoplasmic polyadenylation element binding protein 2	ENSG00000137449	132864	FALSE	-0.478478	8.15439	-3.6743	0.00143554	0.0546365	-1.25733
TC0400012952.hg.1	BDH2	3-hydroxybutyrate dehydrogenase 2	ENSG00000164039	56898	FALSE	-0.324189	6.88356	-3.66714	0.00146001	0.0554446	-1.2735
TC0300013846.hg.1	GXYLT2	glucoside xylosyltransferase 2	ENSG00000172986	727936	FALSE	-0.321945	7.18137	-3.66459	0.00146882	0.055656	-1.27926
TC0600013206.hg.1	SLC18B1	solute carrier family 18 member B1	ENSG00000146409	116843	FALSE	0.595176	5.65605	3.66104	0.00148117	0.055882	-1.28727
TC1700008372.hg.1	SCPEP1	serine carboxypeptidase 1	ENSG00000121064	59342	FALSE	0.372107	6.90651	3.66075	0.00148222	0.055882	-1.28795
TC1100009947.hg.1	OR52E6	olfactory receptor family 52 subfamily E member 6	ENSG00000205409	390078	FALSE	0.656683	4.09977	3.65854	0.00148996	0.055882	-1.29293
TC0600009327.hg.1	PKIB	cAMP-dependent protein kinase inhibitor beta	ENSG00000135549	5570	FALSE	-0.546685	3.95432	-3.65842	0.00149039	0.055882	-1.29321
TC2000006674.hg.1	PLCB4	phospholipase C beta 4	ENSG00000101333	5332	FALSE	-0.467517	6.65401	-3.65821	0.0014911	0.055882	-1.29366
TC0200010116.hg.1	PJVK	pejvakin	ENSG00000204311	494513	FALSE	0.554528	4.67691	3.65243	0.0015116	0.0565265	-1.30672
TC0300010975.hg.1	KIF9	kinesin family member 9	ENSG00000088727	64147	FALSE	0.240979	9.10314	3.64877	0.00152471	0.0568927	-1.31498
TC0100013071.hg.1	MFAP2	microfibril associated protein 2	ENSG00000117122	4237	FALSE	-0.305589	8.55477	-3.64682	0.00153172	0.0570299	-1.31937
TC1000012363.hg.1	NKX6-2	NK6 homeobox 2	ENSG00000148826	84504	FALSE	-0.490169	6.13704	-3.64514	0.00153781	0.0571326	-1.32316
TC1600007944.hg.1	GNAO1	G protein subunit alpha o1	ENSG00000087258	2775	FALSE	0.257464	10.0377	3.64257	0.00154719	0.0573564	-1.32897
TC2000008318.hg.1	FERMT1	FERM domain containing kindlin 1	ENSG00000101311	55612	FALSE	-0.621625	6.35001	-3.63536	0.0015737	0.0580984	-1.34522
TC0200015963.hg.1	TRIP12	thyroid hormone receptor interactor 12	ENSG00000153827	9320	FALSE	-0.313233	8.69956	-3.63529	0.00157399	0.0580984	-1.34539
TC1600007285.hg.1	HS3ST4	heparan sulfate-glucosamine 3-sulfotransferase 4	ENSG00000182601	9951	FALSE	-0.509643	6.37495	-3.63419	0.00157804	0.0581229	-1.34786
TC0100016185.hg.1	FCGR3A	Fc gamma receptor IIIa	ENSG00000203747	2214	FALSE	0.563929	3.82859	3.63193	0.00158649	0.0582553	-1.35296
TC2000009604.hg.1	PMEPA1	prostate transmembrane protein, androgen induced 1	ENSG00000124225	56937	FALSE	-0.331453	9.38067	-3.63141	0.00158844	0.0582553	-1.35413
TC0X00008054.hg.1	RNF128	ring finger protein 128	ENSG00000133135	79589	FALSE	-0.607411	4.2527	-3.62836	0.00159992	0.058551	-1.36102
TC0600007067.hg.1	GMPR	guanosine monophosphate reductase	ENSG00000137198	2766	FALSE	0.337465	7.59944	3.62323	0.00161937	0.0591362	-1.37256
TC0900007100.hg.1	NPR2	natriuretic peptide receptor 2	ENSG00000159899	4882	FALSE	-0.437547	6.74895	-3.61878	0.00163644	0.0596326	-1.38259
TC0900009773.hg.1	LRRC19	leucine rich repeat containing 19	ENSG00000184434	64922	FALSE	0.618085	3.80173	3.60854	0.00167641	0.0609279	-1.40565
TC0100008815.hg.1	IFI44L	interferon induced protein 44 like	ENSG00000137959	10964	FALSE	-0.447981	6.08753	-3.60786	0.0016791	0.0609279	-1.40718
TC0100007370.hg.1	RCAN3	RCAN family member 3	ENSG00000117602	11123	FALSE	0.317317	7.03555	3.60099	0.00170652	0.0617167	-1.42265
TC0500009342.hg.1	TENM2	teneurin transmembrane protein 2	ENSG00000145934	57451	FALSE	-0.485557	6.56148	-3.60041	0.00170884	0.0617167	-1.42395
TC1900010644.hg.1	SYCN	syncollin	ENSG00000179751	342898	FALSE	0.366018	4.81392	3.59971	0.00171165	0.0617167	-1.42552
TC1400006537.hg.1	RNASE3	ribonuclease A family member 3	ENSG00000169397	6037	FALSE	-0.50192	4.70737	-3.59587	0.00172724	0.0621314	-1.43418
TC1000008056.hg.1	VCL	vinculin	ENSG00000035403	7414	FALSE	0.260903	9.5391	3.59509	0.00173041	0.0621314	-1.43593
TC1500009452.hg.1	GNB5	G protein subunit beta 5	ENSG00000069966	10681	FALSE	0.324586	6.96715	3.59399	0.00173489	0.0621621	-1.43841
TC0600014276.hg.1	HLA-DMB	major histocompatibility complex, class II, DM beta	ENSG00000242574	3109	TRUE	-0.622307	5.93605	-3.58909	0.00175502	0.0627519	-1.44942
TC0100016899.hg.1	KIF21B	kinesin family member 21B	ENSG00000116852	23046	FALSE	0.62	6.05183	3.58756	0.00176134	0.0628469	-1.45286
TC1200012730.hg.1	PXMP2	peroxisomal membrane protein 2	ENSG00000176894	5827	FALSE	0.225454	9.22159	3.58566	0.00176928	0.0629987	-1.45715
TC0100013205.hg.1	ECE1	endothelin converting enzyme 1	ENSG00000117298	1889	FALSE	0.319803	8.67473	3.58286	0.00178095	0.0632798	-1.46343
TC0200015912.hg.1	IRS1	insulin receptor substrate 1	ENSG00000169047	3667	FALSE	0.396054	7.00987	3.582	0.00178456	0.0632798	-1.46536
TC0700006529.hg.1	ELFN1	extracellular leucine rich repeat and fibronectin type III domain containing 1	ENSG00000225968	392617	FALSE	-0.288801	8.04348	-3.57832	0.00180007	0.0636981	-1.47363
TC0500007044.hg.1	CDH6	cadherin 6	ENSG00000113361	1004	FALSE	-0.22879	9.50635	-3.57471	0.00181544	0.0641095	-1.48174
TC1800007394.hg.1	ST8SIA3	ST8 alpha-N-acetyl-neuraminide alpha-2,8-sialyltransferase 3	ENSG00000177511	51046	FALSE	0.36931	8.57183	3.57219	0.00182624	0.0643581	-1.48741
TC1700012274.hg.1	ITGB3	integrin subunit beta 3	ENSG00000259207	3690	FALSE	0.618015	5.92162	3.57023	0.00183472	0.0644681	-1.49182
TC1100012469.hg.1	SCN4B	sodium voltage-gated channel beta subunit 4	ENSG00000177098	6330	FALSE	0.443121	5.71284	3.56972	0.00183689	0.0644681	-1.49296
TC0200016469.hg.1	ANXA4	annexin A4	ENSG00000196975	307	FALSE	-0.498753	6.58685	-3.56855	0.00184196	0.0645137	-1.49558
TC2000007288.hg.1	NNAT	neuronatin	ENSG00000053438	4826	FALSE	-0.359024	8.10236	-3.56634	0.00185156	0.0647175	-1.50055
TC0300007386.hg.1	APEH	acylaminoacyl-peptide hydrolase	ENSG00000164062	327	FALSE	0.342868	6.23136	3.56352	0.00186389	0.065016	-1.50688
TC0600013926.hg.1	TCP10L3	t-complex 10 like 3, pseudogene	ENSG00000203690	6953	FALSE	-0.418949	5.46079	-3.55536	0.00190002	0.0661417	-1.52521
TC0200011450.hg.1	ALKAL2	ALK and LTK ligand 2	ENSG00000189292	285016	FALSE	0.451791	6.13126	3.55135	0.00191801	0.0666325	-1.5342
TC0700010697.hg.1	RP9	RP9 pre-mRNA splicing factor	ENSG00000164610	6100	FALSE	-0.2504	8.07229	-3.54817	0.00193241	0.0667999	-1.54133
TC0100013949.hg.1	SLC6A9	solute carrier family 6 member 9	ENSG00000196517	6536	FALSE	0.298592	8.18115	3.54772	0.00193447	0.0667999	-1.54235
TC0800012284.hg.1	EXTL3	exostosin like glycosyltransferase 3	ENSG00000012232	2137	FALSE	-0.19687	9.32922	-3.54771	0.00193453	0.0667999	-1.54238
TC1400009568.hg.1	SLC8A3	solute carrier family 8 member A3	ENSG00000100678	6547	FALSE	-0.598329	4.83473	-3.54628	0.00194103	0.0668893	-1.54558
TC0600009744.hg.1	RAB32	RAB32, member RAS oncogene family	ENSG00000118508	10981	FALSE	-0.412367	7.07106	-3.54142	0.00196335	0.0675226	-1.55649
TC1500008187.hg.1	AKAP13	A-kinase anchoring protein 13	ENSG00000170776	11214	TRUE	-0.27843	8.87425	-3.53972	0.00197119	0.0676564	-1.56029
TC1200011310.hg.1	PHLDA1	pleckstrin homology like domain family A member 1	ENSG00000139289	22822	FALSE	-0.230694	10.6514	-3.53875	0.0019757	0.0676755	-1.56247
TC0100015244.hg.1	KCNA2	potassium voltage-gated channel subfamily A member 2	ENSG00000177301	3737	FALSE	0.408038	6.31401	3.53745	0.00198174	0.0677469	-1.56538
TC0700012652.hg.1	PLXNA4	plexin A4	ENSG00000221866	91584	FALSE	-0.314002	8.60096	-3.53362	0.00199968	0.0682243	-1.57398
TC1100008991.hg.1	DDX10	DEAD-box helicase 10	ENSG00000178105	1662	FALSE	-0.591843	6.11174	-3.52784	0.00202701	0.068805	-1.58692
TC1100007448.hg.1	DGKZ	diacylglycerol kinase zeta	ENSG00000149091	8525	FALSE	0.228642	7.28946	3.52772	0.00202759	0.068805	-1.58719
TC0100010874.hg.1	RGL1	ral guanine nucleotide dissociation stimulator like 1	ENSG00000143344	23179	FALSE	-0.209733	9.9244	-3.52747	0.00202876	0.068805	-1.58774
TC1700006466.hg.1	MRM3	mitochondrial rRNA methyltransferase 3	ENSG00000171861	55178	FALSE	0.404479	5.69287	3.52558	0.00203779	0.0689747	-1.59198
TC0100009994.hg.1	CRCT1	cysteine rich C-terminal 1	ENSG00000169509	54544	FALSE	0.402583	4.87623	3.52461	0.00204245	0.0689961	-1.59415
TC0600008622.hg.1	SH3BGRL2	SH3 domain binding glutamate rich protein like 2	ENSG00000198478	83699	FALSE	0.590949	5.20429	3.52249	0.00205263	0.0692034	-1.59889
TC0900009948.hg.1	ARHGEF39	Rho guanine nucleotide exchange factor 39	ENSG00000137135	84904	FALSE	0.381319	5.8656	3.51631	0.00208266	0.0700781	-1.61274
TC1800008338.hg.1	KCTD1	potassium channel tetramerization domain containing 1	ENSG00000134504	284252	FALSE	0.274226	8.38616	3.51453	0.00209139	0.0701621	-1.61673
TC0500007681.hg.1	OCLN	occludin	ENSG00000197822	100506658	TRUE	0.40745	7.2719	3.51413	0.00209335	0.0701621	-1.61762
TC1200012610.hg.1	SSPN	sarcospan	ENSG00000123096	8082	FALSE	-0.370518	6.84547	-3.51175	0.0021051	0.0704055	-1.62296
TC1700006767.hg.1	WRAP53	WD repeat containing antisense to TP53	ENSG00000141499	55135	FALSE	0.234503	7.99402	3.51099	0.00210883	0.0704055	-1.62465
TC0400009879.hg.1	CYTL1	cytokine like 1	ENSG00000170891	54360	FALSE	0.349907	5.20566	3.5095	0.00211623	0.0705148	-1.62798
TC1700010230.hg.1	MYO18A	myosin XVIIIA	ENSG00000196535	399687	TRUE	0.345622	7.45863	3.50846	0.00212141	0.070536	-1.63032
TC0200006476.hg.1	SNTG2	syntrophin gamma 2	ENSG00000172554	54221	TRUE	0.405199	6.29777	3.50772	0.0021251	0.070536	-1.63197
TC1200010908.hg.1	STAT2	signal transducer and activator of transcription 2	ENSG00000170581	6773	FALSE	-0.239256	8.42035	-3.5031	0.00214827	0.071038	-1.64231
TC0600009112.hg.1	CDC40	cell division cycle 40	ENSG00000168438	51362	FALSE	-0.343423	7.27409	-3.50305	0.00214852	0.071038	-1.64242
TC0200010658.hg.1	CPS1	carbamoyl-phosphate synthase 1	ENSG00000021826	1373	FALSE	-0.254747	7.01663	-3.50073	0.00216024	0.071288	-1.6476
TC1300010029.hg.1	N4BP2L1	NEDD4 binding protein 2 like 1	ENSG00000139597	90634	FALSE	0.40512	6.25911	3.49174	0.00220632	0.0726686	-1.66771
TC0600006554.hg.1	FOXC1	forkhead box C1	ENSG00000054598	2296	FALSE	-0.297887	6.69787	-3.48998	0.00221545	0.0728292	-1.67164
TC0100017321.hg.1	GPATCH2	G-patch domain containing 2	ENSG00000092978	55105	FALSE	-0.309915	6.91338	-3.48788	0.0022264	0.0730491	-1.67634
TC1400010195.hg.1	WARS1	tryptophanyl-tRNA synthetase 1	ENSG00000140105	7453	FALSE	-0.301	8.82044	-3.48422	0.00224557	0.0734054	-1.68451
TC0100016003.hg.1	IQGAP3	IQ motif containing GTPase activating protein 3	ENSG00000183856	128239	FALSE	0.380646	6.75009	3.48397	0.00224688	0.0734054	-1.68506
TC0100009959.hg.1	TUFT1	tuftelin 1	ENSG00000143367	7286	FALSE	-0.265055	6.96343	-3.48305	0.00225174	0.0734054	-1.68712
TC0100011211.hg.1	GPR37L1	G protein-coupled receptor 37 like 1	ENSG00000170075	9283	FALSE	0.287893	7.83581	3.48255	0.00225441	0.0734054	-1.68825
TC0300006596.hg.1	SLC6A11	solute carrier family 6 member 11	ENSG00000132164	6538	FALSE	0.356256	7.54208	3.47888	0.00227388	0.0738989	-1.69644
TC0300006677.hg.1	SLC6A6	solute carrier family 6 member 6	ENSG00000131389	6533	FALSE	0.3858	5.48872	3.47666	0.00228577	0.0741445	-1.7014
TC0100018246.hg.1	LRRC8C	leucine rich repeat containing 8 VRAC subunit C	ENSG00000171488	84230	FALSE	0.349141	7.01365	3.47296	0.00230565	0.0746482	-1.70965
TC1100009700.hg.1	GATD1	glutamine amidotransferase class 1 domain containing 1	ENSG00000177225	347862	FALSE	-0.210148	9.03451	-3.46721	0.00233696	0.075519	-1.72249
TC1100012712.hg.1	ACRV1	acrosomal vesicle protein 1	ENSG00000134940	56	FALSE	-0.667828	4.9009	-3.46587	0.00234427	0.0755214	-1.72547
TC1000008385.hg.1	STAMBPL1	STAM binding protein like 1	ENSG00000138134	57559	FALSE	0.554888	5.80171	3.46559	0.00234585	0.0755214	-1.72611
TC0200014703.hg.1	CCDC148	coiled-coil domain containing 148	ENSG00000153237	130940	FALSE	0.432058	5.58428	3.45475	0.00240615	0.0773174	-1.75027
TC0100006954.hg.1	KAZN	kazrin, periplakin interacting protein	ENSG00000189337	23254	FALSE	0.266736	7.89199	3.45343	0.00241361	0.0774118	-1.75321
TC0900009273.hg.1	RNF224	ring finger protein 224	ENSG00000233198	643596	FALSE	-0.30555	5.27885	-3.45175	0.00242317	0.0775732	-1.75698
TC1500007513.hg.1	LACTB	lactamase beta	ENSG00000103642	114294	FALSE	-0.334485	6.83231	-3.45089	0.00242805	0.0775844	-1.75889
TC0400006578.hg.1	SH3BP2	SH3 domain binding protein 2	ENSG00000087266	6452	FALSE	-0.283593	7.40489	-3.44875	0.00244022	0.0776892	-1.76365
TC0900011370.hg.1	BRINP1	BMP/retinoic acid inducible neural specific 1	ENSG00000078725	1620	FALSE	-0.168713	10.5495	-3.44872	0.0024404	0.0776892	-1.76372
TC0400011518.hg.1	INTS12	integrator complex subunit 12	ENSG00000138785	57117	FALSE	-0.26665	8.56648	-3.44313	0.00247256	0.0785012	-1.77618
TC1700011953.hg.1	CBX4	chromobox 4	ENSG00000141582	8535	FALSE	-0.410678	6.95237	-3.44269	0.00247508	0.0785012	-1.77715
TC1300006543.hg.1	FGF9	fibroblast growth factor 9	ENSG00000102678	2254	FALSE	0.586124	5.19911	3.44054	0.00248757	0.0787517	-1.78194
TC2000006676.hg.1	LAMP5	lysosomal associated membrane protein family member 5	ENSG00000125869	24141	FALSE	0.315149	8.33438	3.43574	0.00251569	0.079495	-1.79263
TC1200011207.hg.1	CPM	carboxypeptidase M	ENSG00000135678	1368	FALSE	0.525759	5.58793	3.42899	0.00255576	0.0806124	-1.80766
TC0900011709.hg.1	TOR1A	torsin family 1 member A	ENSG00000136827	1861	FALSE	-0.308257	8.0493	-3.41947	0.00261328	0.0822752	-1.82882
TC0700010716.hg.1	DPY19L1	dpy-19 like C-mannosyltransferase 1	ENSG00000173852	23333	FALSE	-0.328374	8.49546	-3.41835	0.00262016	0.0823404	-1.83132
TC2000009914.hg.1	TGIF2	TGFB induced factor homeobox 2	ENSG00000118707	60436	FALSE	-0.246497	8.5432	-3.41111	0.00266491	0.0835933	-1.84742
TC0X00009139.hg.1	AP1S2	adaptor related protein complex 1 subunit sigma 2	ENSG00000182287	8905	FALSE	-0.26663	10.6718	-3.40986	0.00267268	0.0836839	-1.85019
TC0500009400.hg.1	KCNIP1	potassium voltage-gated channel interacting protein 1	ENSG00000182132	30820	FALSE	0.288097	9.181	3.40796	0.00268457	0.0839027	-1.85441
TC0500006472.hg.1	TRIP13	thyroid hormone receptor interactor 13	ENSG00000071539	9319	FALSE	0.402921	6.85568	3.4027	0.00271778	0.0847859	-1.8661
TC1900011132.hg.1	SLC6A16	solute carrier family 6 member 16	ENSG00000063127	28968	FALSE	-0.391192	6.25356	-3.39857	0.00274415	0.0854157	-1.87527
TC0200006799.hg.1	MYCN	MYCN proto-oncogene, bHLH transcription factor	ENSG00000134323	4613	FALSE	0.370011	7.33517	3.39798	0.00274794	0.0854157	-1.87658
TC0300012038.hg.1	CCDC191	coiled-coil domain containing 191	ENSG00000163617	57577	FALSE	0.501507	5.85203	3.39509	0.00276658	0.0858391	-1.883
TC1700006627.hg.1	SPNS2	sphingolipid transporter 2	ENSG00000183018	124976	FALSE	0.309519	6.63625	3.39269	0.00278211	0.0861346	-1.88832
TC0900012179.hg.1	SPTAN1	spectrin alpha, non-erythrocytic 1	ENSG00000197694	6709	FALSE	0.175565	10.1418	3.39045	0.00279669	0.0861346	-1.89329
TC1000008081.hg.1	KAT6B	lysine acetyltransferase 6B	ENSG00000156650	23522	TRUE	0.186845	9.85556	3.39025	0.00279803	0.0861346	-1.89375
TC1100008881.hg.1	ARHGAP42	Rho GTPase activating protein 42	ENSG00000165895	143872	FALSE	-0.600807	5.36948	-3.39013	0.00279878	0.0861346	-1.894
TC1100009618.hg.1	GLB1L2	galactosidase beta 1 like 2	ENSG00000149328	89944	FALSE	0.468538	6.06596	3.38975	0.00280125	0.0861346	-1.89484
TC0600012539.hg.1	GABRR1	gamma-aminobutyric acid type A receptor subunit rho1	ENSG00000146276	2569	FALSE	-0.563177	3.97175	-3.3859	0.00282656	0.0867573	-1.90338
TC0900006560.hg.1	PDCD1LG2	programmed cell death 1 ligand 2	ENSG00000197646	80380	FALSE	-0.456926	5.36563	-3.38341	0.00284302	0.0868664	-1.9089
TC0100018451.hg.1	GBP2	guanylate binding protein 2	ENSG00000162645	2634	FALSE	-0.455216	5.67402	-3.38336	0.00284336	0.0868664	-1.90901
TC0900006481.hg.1	VLDLR	very low density lipoprotein receptor	ENSG00000147852	7436	FALSE	-0.194531	7.97236	-3.38307	0.00284533	0.0868664	-1.90967
TC1900007382.hg.1	PGPEP1	pyroglutamyl-peptidase I	ENSG00000130517	54858	FALSE	-0.267238	7.34942	-3.38035	0.00286343	0.0872632	-1.91569
TC0100006865.hg.1	AGTRAP	angiotensin II receptor associated protein	ENSG00000177674	57085	FALSE	0.243394	8.32936	3.37875	0.00287416	0.0874348	-1.91924
TC0600011508.hg.1	TAP1	transporter 1, ATP binding cassette subfamily B member	ENSG00000168394	6890	TRUE	-0.244028	8.387	-3.37502	0.00289927	0.087928	-1.9275
TC1200010562.hg.1	COL2A1	collagen type II alpha 1 chain	ENSG00000139219	1280	FALSE	-0.386536	7.19782	-3.37482	0.00290064	0.087928	-1.92795
TC0800010558.hg.1	TOX	thymocyte selection associated high mobility group box	ENSG00000198846	9760	FALSE	-0.22347	9.6144	-3.37297	0.00291317	0.0881517	-1.93205
TC0100016822.hg.1	KCNT2	potassium sodium-activated channel subfamily T member 2	ENSG00000162687	343450	FALSE	-0.434207	6.54143	-3.35941	0.0030068	0.0906801	-1.96208
TC1900010856.hg.1	PLAUR	plasminogen activator, urokinase receptor	ENSG00000011422	5329	FALSE	0.409326	6.84658	3.35934	0.00300731	0.0906801	-1.96224
TC0900009707.hg.1	IFNA2	interferon alpha 2	ENSG00000188379	3440	FALSE	0.507257	4.01481	3.35832	0.00301447	0.0907362	-1.9645
TC0X00009025.hg.1	ANOS1	anosmin 1	ENSG00000011201	3730	FALSE	-0.241318	9.26817	-3.35422	0.00304341	0.0914064	-1.97356
TC1500006643.hg.1	GABRA5	gamma-aminobutyric acid type A receptor subunit alpha5	ENSG00000186297	2558	FALSE	0.369863	8.03597	3.35365	0.00304741	0.0914064	-1.97481
TC0700007105.hg.1	ADCYAP1R1	ADCYAP receptor type I	ENSG00000078549	117	FALSE	-0.577078	6.52435	-3.34964	0.00307608	0.092105	-1.9837
TC0500007665.hg.1	CCNB1	cyclin B1	ENSG00000134057	891	FALSE	0.211343	9.0831	3.34607	0.00310177	0.0926561	-1.99159
TC0700012886.hg.1	EPHA1	EPH receptor A1	ENSG00000146904	2041	TRUE	0.546195	4.18091	3.34558	0.00310531	0.0926561	-1.99267
TC0500013251.hg.1	KCTD16	potassium channel tetramerization domain containing 16	ENSG00000183775	57528	FALSE	-0.707635	4.03883	-3.34315	0.00312295	0.0928625	-1.99804
TC1400009351.hg.1	SIX1	SIX homeobox 1	ENSG00000126778	6495	FALSE	-0.729672	4.67731	-3.3431	0.00312334	0.0928625	-1.99816
TC0100015837.hg.1	LCE3A	late cornified envelope 3A	ENSG00000185962	353142	FALSE	-0.463561	5.68236	-3.34239	0.00312849	0.0928625	-1.99972
TC1200006444.hg.1	CCDC77	coiled-coil domain containing 77	ENSG00000120647	84318	FALSE	0.25539	6.97244	3.33924	0.00315155	0.093385	-2.00669
TC1300009637.hg.1	GGACT	gamma-glutamylamine cyclotransferase	ENSG00000134864	87769	FALSE	0.438254	4.51999	3.33792	0.00316122	0.0935098	-2.0096
TC1600008005.hg.1	ADGRG1	adhesion G protein-coupled receptor G1	ENSG00000205336	9289	FALSE	-0.196497	10.7943	-3.3359	0.00317612	0.0935591	-2.01406
TC0300013471.hg.1	BCL6	BCL6 transcription repressor	ENSG00000113916	604	FALSE	-0.348083	8.74265	-3.33589	0.00317618	0.0935591	-2.01407
TC0600008262.hg.1	TMEM14A	transmembrane protein 14A	ENSG00000096092	28978	FALSE	0.206604	8.7482	3.33547	0.00317927	0.0935591	-2.015
TC0700013390.hg.1	TRIM73	tripartite motif containing 73	ENSG00000178809	375593	TRUE	-0.336199	5.2726	-3.33454	0.00318617	0.0936012	-2.01705
TC1100012474.hg.1	MPZL2	myelin protein zero like 2	ENSG00000149573	10205	FALSE	0.460032	4.57414	3.33216	0.00320391	0.0939612	-2.02232
TC0300011852.hg.1	IMPG2	interphotoreceptor matrix proteoglycan 2	ENSG00000081148	50939	FALSE	0.624356	4.35171	3.33067	0.00321501	0.0941257	-2.0256
TC0200015741.hg.1	RNF25	ring finger protein 25	ENSG00000163481	64320	FALSE	-0.240915	7.38859	-3.32765	0.00323775	0.0946296	-2.03228
TC1400009282.hg.1	OTX2	orthodenticle homeobox 2	ENSG00000165588	5015	FALSE	-0.543613	5.86546	-3.32068	0.00329067	0.0960124	-2.04765
TC0200007195.hg.1	TTC27	tetratricopeptide repeat domain 27	ENSG00000018699	55622	TRUE	-0.441492	6.28738	-3.31702	0.00331883	0.0966693	-2.05573
TC0800011579.hg.1	EXT1	exostosin glycosyltransferase 1	ENSG00000182197	2131	FALSE	0.223252	8.43968	3.3119	0.00335861	0.0976063	-2.06702
TC0X00007129.hg.1	UBA1	ubiquitin like modifier activating enzyme 1	ENSG00000130985	7317	FALSE	0.192437	8.77596	3.31141	0.00336239	0.0976063	-2.06809
TC1900009984.hg.1	UNC13A	unc-13 homolog A	ENSG00000130477	23025	FALSE	0.590177	5.21124	3.31043	0.00337012	0.097665	-2.07027
TC1100011452.hg.1	FGF3	fibroblast growth factor 3	ENSG00000186895	2248	FALSE	-0.491301	5.28669	-3.3072	0.00339551	0.0982348	-2.07738
TC1600007931.hg.1	LPCAT2	lysophosphatidylcholine acyltransferase 2	ENSG00000087253	54947	FALSE	-0.35915	9.25638	-3.30552	0.00340877	0.098452	-2.08107
TC0600011875.hg.1	LRRC73	leucine rich repeat containing 73	ENSG00000204052	221424	FALSE	0.430117	5.96798	3.30254	0.00343248	0.0989697	-2.08764
TC1800006675.hg.1	APCDD1	APC down-regulated 1	ENSG00000154856	147495	FALSE	-0.355032	6.63438	-3.30179	0.00343845	0.0989754	-2.08929
TC0700010760.hg.1	ELMO1	engulfment and cell motility 1	ENSG00000155849	9844	FALSE	0.484989	6.36236	3.30066	0.00344753	0.0990702	-2.09179
TC1100011014.hg.1	SLC15A3	solute carrier family 15 member 3	ENSG00000110446	51296	FALSE	-0.359799	6.33988	-3.29582	0.00348655	0.100015	-2.10245
TC0100013641.hg.1	AK2	adenylate kinase 2	ENSG00000004455	204	FALSE	-0.175413	9.05511	-3.29479	0.00349483	0.100015	-2.1047
TC2000008530.hg.1	DZANK1	double zinc ribbon and ankyrin repeat domains 1	ENSG00000089091	55184	FALSE	0.354929	5.60471	3.29442	0.00349791	0.100015	-2.10553
TC1300008688.hg.1	FOXO1	forkhead box O1	ENSG00000150907	2308	FALSE	0.294099	6.72016	3.29305	0.00350905	0.100166	-2.10854
TC0200013298.hg.1	ST3GAL5	ST3 beta-galactoside alpha-2,3-sialyltransferase 5	ENSG00000115525	8869	FALSE	0.276127	7.44285	3.28915	0.00354094	0.100858	-2.11711
TC0300011628.hg.1	ROBO1	roundabout guidance receptor 1	ENSG00000169855	6091	FALSE	0.166799	9.93322	3.28865	0.00354507	0.100858	-2.11822
TC2000008436.hg.1	TASP1	taspase 1	ENSG00000089123	55617	FALSE	-0.462284	5.87621	-3.28762	0.00355355	0.100861	-2.12048
TC0400012810.hg.1	MOB1B	MOB kinase activator 1B	ENSG00000173542	92597	FALSE	0.282405	8.51495	3.28721	0.00355695	0.100861	-2.12138
TC1100012750.hg.1	KIRREL3	kirre like nephrin family adhesion molecule 3	ENSG00000149571	84623	FALSE	0.408814	5.76236	3.28606	0.00356647	0.100963	-2.12391
TC1700008974.hg.1	MGAT5B	alpha-1,6-mannosylglycoprotein 6-beta-N-acetylglucosaminyltransferase B	ENSG00000167889	146664	FALSE	0.3873	5.89766	3.28505	0.00357483	0.101033	-2.12613
TC1200010976.hg.1	AGAP2	ArfGAP with GTPase domain, ankyrin repeat and PH domain 2	ENSG00000135439	116986	FALSE	0.37569	7.7591	3.28234	0.00359745	0.101377	-2.1321
TC0300011391.hg.1	ADAMTS9	ADAM metallopeptidase with thrombospondin type 1 motif 9	ENSG00000163638	56999	FALSE	0.349398	8.47716	3.28217	0.00359885	0.101377	-2.13247
TC0700012182.hg.1	NAMPT	nicotinamide phosphoribosyltransferase	ENSG00000105835	10135	FALSE	0.369865	6.75245	3.28116	0.00360726	0.101448	-2.13468
TC0100012469.hg.1	MXRA8	matrix remodeling associated 8	ENSG00000162576	54587	FALSE	-0.357577	7.36739	-3.27993	0.00361758	0.101475	-2.13739
TC1100011097.hg.1	ZBTB3	zinc finger and BTB domain containing 3	ENSG00000185670	79842	FALSE	-0.381562	5.39401	-3.27933	0.00362268	0.101475	-2.13872
TC0X00006587.hg.1	CLDN34	claudin 34	ENSG00000234469	100288814	FALSE	0.50808	4.28294	3.27893	0.00362601	0.101475	-2.13959
TC1700012110.hg.1	SECTM1	secreted and transmembrane 1	ENSG00000141574	6398	FALSE	-0.451293	4.95038	-3.27776	0.0036359	0.101569	-2.14217
TC1600010006.hg.1	PRSS8	serine protease 8	ENSG00000052344	5652	FALSE	-0.413803	5.27393	-3.27669	0.0036449	0.101569	-2.14451
TC1100012957.hg.1	TRIM22	tripartite motif containing 22	ENSG00000132274	10346	FALSE	-0.377218	7.4197	-3.27642	0.00364718	0.101569	-2.1451
TC1500010251.hg.1	HOMER2	homer scaffold protein 2	ENSG00000103942	9455	FALSE	-0.260959	8.31181	-3.27383	0.00366922	0.102017	-2.1508
TC0800008783.hg.1	SQLE	squalene epoxidase	ENSG00000104549	6713	FALSE	0.225932	10.0314	3.27246	0.00368088	0.102176	-2.15381
TC0600012437.hg.1	SNAP91	synaptosome associated protein 91	ENSG00000065609	9892	FALSE	0.497322	5.91657	3.2704	0.00369851	0.102499	-2.15833
TC0800011129.hg.1	CDH17	cadherin 17	ENSG00000079112	1015	FALSE	0.447524	4.35816	3.26888	0.00371157	0.102695	-2.16167
TC1100008257.hg.1	ANO1	anoctamin 1	ENSG00000131620	55107	FALSE	-0.289168	8.00212	-3.26632	0.00373367	0.103091	-2.16729
TC1300009740.hg.1	LIG4	DNA ligase 4	ENSG00000174405	3981	FALSE	-0.3931	7.03586	-3.26583	0.00373795	0.103091	-2.16837
TC0700011560.hg.1	CCL26	C-C motif chemokine ligand 26	ENSG00000006606	10344	FALSE	0.480157	4.08145	3.26379	0.0037557	0.103415	-2.17285
TC0X00006651.hg.1	EGFL6	EGF like domain multiple 6	ENSG00000198759	25975	FALSE	-0.443958	3.97052	-3.26172	0.00377371	0.103655	-2.17738
TC1200012698.hg.1	CHPT1	choline phosphotransferase 1	ENSG00000111666	56994	FALSE	-0.301308	8.42937	-3.2614	0.00377654	0.103655	-2.17809
TC0100013272.hg.1	HTR1D	5-hydroxytryptamine receptor 1D	ENSG00000179546	3352	FALSE	-0.34279	6.33897	-3.2598	0.00379057	0.103874	-2.1816
TC1100006663.hg.1	OR51E1	olfactory receptor family 51 subfamily E member 1	ENSG00000180785	143503	FALSE	0.413773	4.25019	3.25833	0.00380351	0.104062	-2.18482
TC0X00010643.hg.1	SEPTIN6	septin 6	ENSG00000125354	23157	FALSE	-0.30919	7.95288	-3.25685	0.00381662	0.104254	-2.18808
TC0100011797.hg.1	STUM	stum, mechanosensory transduction mediator homolog	ENSG00000203685	375057	FALSE	0.301462	6.52659	3.25546	0.0038289	0.104423	-2.19112
TC1600008310.hg.1	MARVELD3	MARVEL domain containing 3	ENSG00000140832	91862	FALSE	0.380999	5.78777	3.2524	0.00385622	0.104781	-2.19784
TC1700012346.hg.1	CLDN7	claudin 7	ENSG00000181885	1366	TRUE	-0.436876	5.28922	-3.25221	0.00385786	0.104781	-2.19825
TC0600013147.hg.1	ARHGAP18	Rho GTPase activating protein 18	ENSG00000146376	93663	FALSE	-0.439199	7.13879	-3.25086	0.00386997	0.104781	-2.20121
TC0900011305.hg.1	TNC	tenascin C	ENSG00000041982	3371	FALSE	0.184761	10.6539	3.25041	0.00387399	0.104781	-2.20219
TC1000007700.hg.1	UBE2D1	ubiquitin conjugating enzyme E2 D1	ENSG00000072401	7321	FALSE	0.175842	8.31723	3.2501	0.00387675	0.104781	-2.20286
TC0100016080.hg.1	OR6N1	olfactory receptor family 6 subfamily N member 1	ENSG00000197403	128372	FALSE	0.60629	3.99405	3.24932	0.00388382	0.104781	-2.20459
TC0700013346.hg.1	INMT	indolethylamine N-methyltransferase	ENSG00000241644	11185	TRUE	0.402101	3.91672	3.24883	0.00388818	0.104781	-2.20565
TC0700010857.hg.1	GLI3	GLI family zinc finger 3	ENSG00000106571	2737	FALSE	-0.221132	8.94032	-3.24853	0.00389096	0.104781	-2.20633
TC0100010887.hg.1	C1orf21	chromosome 1 open reading frame 21	ENSG00000116667	81563	FALSE	-0.283476	8.85525	-3.24753	0.00389994	0.104849	-2.20851
TC0900012167.hg.1	GSN	gelsolin	ENSG00000148180	2934	FALSE	0.236038	8.72293	3.24689	0.00390574	0.104849	-2.20991
TC1000007272.hg.1	CREM	cAMP responsive element modulator	ENSG00000095794	1390	FALSE	-0.286397	6.84488	-3.24504	0.00392247	0.105133	-2.21395
TC2200007620.hg.1	FBLN1	fibulin 1	ENSG00000077942	2192	FALSE	-0.527955	6.12675	-3.24073	0.00396185	0.105989	-2.2234
TC1000007132.hg.1	BAMBI	BMP and activin membrane bound inhibitor	ENSG00000095739	25805	FALSE	0.408874	6.56931	3.23967	0.00397161	0.105989	-2.22573
TC0100015401.hg.1	IGSF3	immunoglobulin superfamily member 3	ENSG00000143061	3321	FALSE	0.200826	8.73761	3.23952	0.00397297	0.105989	-2.22605
TC1000010499.hg.1	ZFAND4	zinc finger AN1-type containing 4	ENSG00000172671	93550	FALSE	-0.308435	7.3344	-3.23342	0.0040295	0.10733	-2.23941
TC0600007006.hg.1	RNF182	ring finger protein 182	ENSG00000180537	221687	FALSE	0.417855	5.56353	3.22906	0.00407038	0.108251	-2.24895
TC0900009776.hg.1	MOB3B	MOB kinase activator 3B	ENSG00000120162	79817	FALSE	-0.220748	9.28532	-3.22782	0.00408212	0.108391	-2.25167
TC0100012320.hg.1	OR2G3	olfactory receptor family 2 subfamily G member 3	ENSG00000177476	81469	FALSE	0.27607	7.27205	3.22716	0.00408832	0.108391	-2.25311
TC1200008601.hg.1	ANO4	anoctamin 4	ENSG00000151572	121601	TRUE	-0.382909	6.98817	-3.22503	0.00410855	0.108531	-2.25777
TC0200010216.hg.1	ITGAV	integrin subunit alpha V	ENSG00000138448	3685	FALSE	-0.365699	6.88897	-3.22494	0.00410941	0.108531	-2.25797
TC1700009758.hg.1	PIRT	phosphoinositide interacting regulator of transient receptor potential channels	ENSG00000233670	644139	FALSE	0.512381	3.80596	3.2246	0.00411262	0.108531	-2.25871
TC1200011573.hg.1	NR2C1	nuclear receptor subfamily 2 group C member 1	ENSG00000120798	7181	FALSE	0.384355	7.46247	3.22371	0.00412109	0.108588	-2.26065
TC0700010603.hg.1	TRIL	TLR4 interactor with leucine rich repeats	ENSG00000255690	9865	FALSE	0.357676	5.3123	3.21783	0.00417752	0.109905	-2.2735
TC2100007355.hg.1	PFKL	phosphofructokinase, liver type	ENSG00000141959	5211	FALSE	-0.259381	8.53347	-3.21597	0.00419554	0.110118	-2.27757
TC2200007505.hg.1	SEPTIN3	septin 3	ENSG00000100167	55964	FALSE	0.171185	10.8731	3.2156	0.00419909	0.110118	-2.27837
TC0300010315.hg.1	IQSEC1	IQ motif and Sec7 domain ArfGEF 1	ENSG00000144711	9922	FALSE	-0.30755	5.39832	-3.21501	0.0042049	0.110118	-2.27967
TC0400006603.hg.1	DOK7	docking protein 7	ENSG00000175920	285489	FALSE	-0.463552	6.54373	-3.2123	0.00423128	0.11064	-2.28558
TC0200014814.hg.1	SCN1A	sodium voltage-gated channel alpha subunit 1	ENSG00000144285	6323	FALSE	-0.367439	7.31055	-3.2116	0.00423817	0.110651	-2.28712
TC0600014223.hg.1	SLC22A23	solute carrier family 22 member 23	ENSG00000137266	63027	FALSE	-0.423939	7.99982	-3.21069	0.00424709	0.110715	-2.28911
TC2200007360.hg.1	CBY1	chibby family member 1, beta catenin antagonist	ENSG00000100211	25776	FALSE	0.199844	7.74097	3.20668	0.0042866	0.111575	-2.29785
TC1700009528.hg.1	CXCL16	C-X-C motif chemokine ligand 16	ENSG00000161921	58191	FALSE	0.264169	6.97885	3.20465	0.00430675	0.11193	-2.30228
TC1000007625.hg.1	PRKG1	protein kinase cGMP-dependent 1	ENSG00000185532	5592	FALSE	-0.260765	8.60752	-3.20336	0.0043196	0.112094	-2.30509
TC1900011194.hg.1	KCNC3	potassium voltage-gated channel subfamily C member 3	ENSG00000131398	3748	FALSE	0.445083	5.60849	3.20249	0.00432835	0.112145	-2.30701
TC1500010888.hg.1	PARP6	poly(ADP-ribose) polymerase family member 6	ENSG00000137817	56965	FALSE	0.18065	9.50878	3.20155	0.0043377	0.112145	-2.30904
TC0500012567.hg.1	FAXDC2	fatty acid hydroxylase domain containing 2	ENSG00000170271	10826	FALSE	-0.343562	6.85695	-3.2012	0.00434124	0.112145	-2.30981
TC0100006486.hg.1	AGRN	agrin	ENSG00000188157	375790	FALSE	-0.278955	9.01777	-3.19991	0.00435419	0.11231	-2.31263
TC1600010685.hg.1	SMPD3	sphingomyelin phosphodiesterase 3	ENSG00000103056	55512	FALSE	0.344831	6.33988	3.19778	0.00437567	0.112695	-2.31727
TC0600009862.hg.1	AKAP12	A-kinase anchoring protein 12	ENSG00000131016	9590	FALSE	-0.202336	9.47361	-3.19675	0.00438614	0.112795	-2.31953
TC0400007799.hg.1	SLC4A4	solute carrier family 4 member 4	ENSG00000080493	8671	FALSE	0.237626	7.79484	3.19366	0.00441756	0.113433	-2.32627
TC0300006905.hg.1	RBMS3	RNA binding motif single stranded interacting protein 3	ENSG00000144642	27303	FALSE	-0.277322	6.87451	-3.18608	0.00449555	0.115254	-2.34279
TC2200007021.hg.1	RFPL1	ret finger protein like 1	ENSG00000128250	5988	FALSE	0.520033	4.55363	3.18546	0.00450194	0.115254	-2.34413
TC0900010442.hg.1	C9orf40	chromosome 9 open reading frame 40	ENSG00000135045	55071	FALSE	0.659321	5.05498	3.1845	0.00451198	0.115338	-2.34623
TC0100015868.hg.1	S100A2	S100 calcium binding protein A2	ENSG00000196754	6273	FALSE	0.334667	6.98527	3.18318	0.00452572	0.115517	-2.3491
TC1300007565.hg.1	SLAIN1	SLAIN motif family member 1	ENSG00000139737	122060	FALSE	0.265461	9.2058	3.18099	0.00454862	0.115788	-2.35386
TC0600011938.hg.1	CLIC5	chloride intracellular channel 5	ENSG00000112782	53405	FALSE	-0.542771	3.85963	-3.18087	0.00454985	0.115788	-2.35412
TC0100011163.hg.1	PKP1	plakophilin 1	ENSG00000081277	5317	FALSE	-0.431645	5.02547	-3.18005	0.00455846	0.115835	-2.3559
TC0200015336.hg.1	ANKRD44	ankyrin repeat domain 44	ENSG00000065413	91526	FALSE	-0.403811	5.50157	-3.17816	0.0045784	0.116169	-2.36002
TC2200009272.hg.1	APOBEC3D	apolipoprotein B mRNA editing enzyme catalytic subunit 3D	ENSG00000243811	140564	FALSE	-0.620048	4.28366	-3.17694	0.00459131	0.116325	-2.36268
TC1100007833.hg.1	INCENP	inner centromere protein	ENSG00000149503	3619	FALSE	0.203993	8.31055	3.17556	0.00460598	0.116439	-2.36569
TC1300007312.hg.1	PCDH17	protocadherin 17	ENSG00000118946	27253	FALSE	0.598669	4.9504	3.17523	0.00460943	0.116439	-2.36639
TC2100007451.hg.1	COL6A2	collagen type VI alpha 2 chain	ENSG00000142173	1292	FALSE	-0.540118	5.8621	-3.17381	0.00462456	0.116493	-2.36948
TC0600014284.hg.1	CPNE5	copine 5	ENSG00000124772	57699	FALSE	0.391015	6.72312	3.17325	0.00463055	0.116493	-2.37071
TC1200006905.hg.1	FAM234B	family with sequence similarity 234 member B	ENSG00000084444	57613	FALSE	0.427315	6.62911	3.17312	0.00463196	0.116493	-2.37099
TC1400010377.hg.1	AKT1	AKT serine/threonine kinase 1	ENSG00000142208	207	FALSE	-0.239747	10.0212	-3.17067	0.0046582	0.116645	-2.37632
TC1500010407.hg.1	ANPEP	alanyl aminopeptidase, membrane	ENSG00000166825	290	FALSE	-0.595926	5.02111	-3.17033	0.00466184	0.116645	-2.37706
TC0400010626.hg.1	FRYL	FRY like transcription coactivator	ENSG00000075539	285527	FALSE	-0.38959	7.61631	-3.17009	0.00466444	0.116645	-2.37758
TC0100007396.hg.1	RHD	Rh blood group D antigen	ENSG00000187010	6007	FALSE	0.456677	4.50787	3.16913	0.00467473	0.116645	-2.37966
TC2100007446.hg.1	COL6A1	collagen type VI alpha 1 chain	ENSG00000142156	1291	FALSE	-0.252903	8.63853	-3.16898	0.00467638	0.116645	-2.38
TC1200011367.hg.1	PPP1R12A	protein phosphatase 1 regulatory subunit 12A	ENSG00000058272	4659	FALSE	-0.347867	8.54405	-3.16875	0.00467887	0.116645	-2.3805
TC0100006699.hg.1	THAP3	THAP domain containing 3	ENSG00000041988	90326	FALSE	-0.24469	6.32895	-3.16563	0.00471267	0.11715	-2.38729
TC1400010791.hg.1	SLC25A29	solute carrier family 25 member 29	ENSG00000197119	123096	FALSE	0.293061	7.43583	3.16562	0.0047128	0.11715	-2.38731
TC1900010943.hg.1	RTN2	reticulon 2	ENSG00000125744	6253	FALSE	0.286839	7.73973	3.16381	0.00473241	0.117327	-2.39123
TC0800012247.hg.1	ZNF16	zinc finger protein 16	ENSG00000170631	7564	FALSE	0.293401	6.12231	3.16349	0.00473593	0.117327	-2.39193
TC0800009854.hg.1	BIN3-IT1	BIN3 intronic transcript 1		80094	FALSE	-0.506144	5.00372	-3.16307	0.00474048	0.117327	-2.39283
TC1700010371.hg.1	ASIC2	acid sensing ion channel subunit 2	ENSG00000108684	40	TRUE	0.328277	5.59634	3.16227	0.00474926	0.117375	-2.39458
TC0800010382.hg.1	SNAI2	snail family transcriptional repressor 2	ENSG00000019549	6591	FALSE	-0.331966	7.01117	-3.15874	0.00478804	0.118162	-2.40225
TC1500009216.hg.1	TGM7	transglutaminase 7	ENSG00000159495	116179	FALSE	0.417549	4.78063	3.15747	0.00480211	0.118249	-2.40501
TC1000007590.hg.1	SLC18A3	solute carrier family 18 member A3	ENSG00000187714	6572	FALSE	-0.348299	5.34942	-3.15663	0.00481141	0.118249	-2.40684
TC0100013072.hg.1	ATP13A2	ATPase cation transporting 13A2	ENSG00000159363	23400	FALSE	-0.228601	10.0609	-3.15655	0.00481225	0.118249	-2.407
TC0600014101.hg.1	MICA	MHC class I polypeptide-related sequence A	ENSG00000204520	100507436	TRUE	-0.475007	5.85448	-3.15514	0.00482798	0.118465	-2.41008
TC1500006788.hg.1	GREM1	gremlin 1, DAN family BMP antagonist	ENSG00000166923	26585	TRUE	-0.455402	6.28457	-3.15421	0.00483834	0.11855	-2.4121
TC0100011453.hg.1	G0S2	G0/G1 switch 2	ENSG00000123689	50486	FALSE	-0.336225	6.50312	-3.15317	0.00484984	0.118662	-2.41434
TC0100015310.hg.1	SLC16A1	solute carrier family 16 member 1	ENSG00000155380	6566	TRUE	-0.308069	7.81943	-3.15223	0.00486037	0.11875	-2.41638
TC1400009563.hg.1	SLC10A1	solute carrier family 10 member 1	ENSG00000100652	6554	FALSE	-0.44971	4.63093	-3.14916	0.00489484	0.119421	-2.42304
TC0400012378.hg.1	SH3RF1	SH3 domain containing ring finger 1	ENSG00000154447	57630	FALSE	-0.197267	8.90736	-3.14507	0.00494123	0.120382	-2.43193
TC0600007530.hg.1	HLA-E	major histocompatibility complex, class I, E	ENSG00000204592	3133	TRUE	-0.30945	6.62142	-3.14286	0.00496641	0.120712	-2.43672
TC0400011548.hg.1	LEF1	lymphoid enhancer binding factor 1	ENSG00000138795	51176	FALSE	-0.296302	6.91887	-3.14264	0.00496887	0.120712	-2.43719
TC1800007595.hg.1	CCDC102B	coiled-coil domain containing 102B	ENSG00000150636	79839	FALSE	-0.699289	4.97574	-3.14063	0.00499198	0.121101	-2.44156
TC1900007888.hg.1	APLP1	amyloid beta precursor like protein 1	ENSG00000105290	333	FALSE	0.253581	8.63228	3.13922	0.00500812	0.121321	-2.4446
TC0700012115.hg.1	NAPEPLD	N-acyl phosphatidylethanolamine phospholipase D	ENSG00000161048	222236	TRUE	-0.387445	6.35093	-3.13725	0.00503085	0.121355	-2.44887
TC0200014620.hg.1	CACNB4	calcium voltage-gated channel auxiliary subunit beta 4	ENSG00000182389	785	FALSE	0.38868	6.46421	3.13671	0.00503717	0.121355	-2.45005
TC0300009855.hg.1	IL1RAP	interleukin 1 receptor accessory protein	ENSG00000196083	3556	FALSE	-0.481652	6.63078	-3.13666	0.00503776	0.121355	-2.45016
TC1000008328.hg.1	SHLD2	shieldin complex subunit 2	ENSG00000122376	54537	FALSE	-0.552797	5.82556	-3.13665	0.00503786	0.121355	-2.45018
TC1900010334.hg.1	TSHZ3	teashirt zinc finger homeobox 3	ENSG00000121297	57616	FALSE	0.284687	7.91267	3.13406	0.00506792	0.121908	-2.45579
TC1200012641.hg.1	RDH5	retinol dehydrogenase 5	ENSG00000135437	5959	FALSE	0.310447	6.50167	3.13206	0.00509129	0.122298	-2.46012
TC0300007117.hg.1	ENTPD3	ectonucleoside triphosphate diphosphohydrolase 3	ENSG00000168032	956	FALSE	0.355102	4.97096	3.1307	0.00510727	0.12251	-2.46307
TC1300007161.hg.1	CDADC1	cytidine and dCMP deaminase domain containing 1	ENSG00000102543	81602	FALSE	-0.318033	7.39693	-3.12967	0.00511938	0.122629	-2.4653
TC0300011172.hg.1	TNNC1	troponin C1, slow skeletal and cardiac type	ENSG00000114854	7134	FALSE	-0.27476	8.1621	-3.12833	0.00513515	0.122835	-2.4682
TC1200006438.hg.1	IQSEC3	IQ motif and Sec7 domain ArfGEF 3	ENSG00000120645	440073	TRUE	0.455733	5.99301	3.12649	0.00515693	0.123184	-2.47219
TC1900011874.hg.1	ZNF878	zinc finger protein 878	ENSG00000257446	729747	FALSE	-0.371511	4.94991	-3.12102	0.0052222	0.124569	-2.48403
TC0400011973.hg.1	CLGN	calmegin	ENSG00000153132	1047	FALSE	-0.369771	4.59568	-3.11823	0.00525581	0.125073	-2.49007
TC1200009196.hg.1	MLXIP	MLX interacting protein	ENSG00000175727	22877	TRUE	-0.24629	7.13999	-3.11805	0.00525791	0.125073	-2.49045
TC0X00009179.hg.1	RAI2	retinoic acid induced 2	ENSG00000131831	10742	FALSE	0.425469	6.45455	3.11684	0.00527259	0.125218	-2.49307
TC0500011157.hg.1	GCNT4	glucosaminyl (N-acetyl) transferase 4	ENSG00000176928	51301	FALSE	0.597469	5.59244	3.11634	0.00527867	0.125218	-2.49415
TC0500008470.hg.1	SNCAIP	synuclein alpha interacting protein	ENSG00000064692	9627	FALSE	0.191298	9.6296	3.11257	0.00532459	0.126022	-2.50231
TC2000009736.hg.1	HRH3	histamine receptor H3	ENSG00000101180	11255	FALSE	0.393262	5.08573	3.11235	0.00532727	0.126022	-2.50278
TC0X00008017.hg.1	PLP1	proteolipid protein 1	ENSG00000123560	5354	FALSE	-0.350943	7.66185	-3.11048	0.00535017	0.12639	-2.50682
TC0200016578.hg.1	NUP35	nucleoporin 35	ENSG00000163002	129401	FALSE	0.278224	6.773	3.10916	0.00536633	0.126597	-2.50966
TC1100008342.hg.1	INPPL1	inositol polyphosphate phosphatase like 1	ENSG00000165458	3636	FALSE	-0.177797	8.95375	-3.1064	0.00540054	0.127228	-2.51564
TC0800008478.hg.1	FZD6	frizzled class receptor 6	ENSG00000164930	8323	FALSE	-0.623355	5.29441	-3.10443	0.00542492	0.127627	-2.51988
TC1700010518.hg.1	GPR179	G protein-coupled receptor 179	ENSG00000277399	440435	TRUE	0.482189	4.44156	3.10283	0.00544489	0.127921	-2.52333
TC1200012802.hg.1	PAN2	poly(A) specific ribonuclease subunit PAN2	ENSG00000135473	9924	TRUE	0.275382	7.49043	3.10218	0.00545308	0.127938	-2.52475
TC2100007140.hg.1	ETS2	ETS proto-oncogene 2, transcription factor	ENSG00000157557	2114	FALSE	-0.580983	4.36765	-3.10107	0.0054669	0.128087	-2.52713
TC0300009131.hg.1	HPS3	HPS3 biogenesis of lysosomal organelles complex 2 subunit 1	ENSG00000163755	84343	FALSE	-0.286132	8.84361	-3.0994	0.00548795	0.12826	-2.53074
TC0400007784.hg.1	AMBN	ameloblastin	ENSG00000178522	258	FALSE	0.47613	5.54554	3.09921	0.00549034	0.12826	-2.53115
TC2200009152.hg.1	PLXNB2	plexin B2	ENSG00000196576	23654	FALSE	-0.184645	10.0733	-3.09842	0.00550025	0.12826	-2.53285
TC0400011695.hg.1	SEC24D	SEC24 homolog D, COPII coat complex component	ENSG00000150961	9871	FALSE	-0.276136	7.63044	-3.09811	0.00550422	0.12826	-2.53353
TC0100011091.hg.1	C1orf53	chromosome 1 open reading frame 53	ENSG00000203724	388722	FALSE	0.396184	5.96128	3.09711	0.00551688	0.12838	-2.53569
TC0200014597.hg.1	RND3	Rho family GTPase 3	ENSG00000115963	390	FALSE	0.21569	9.251	3.09466	0.00554791	0.128927	-2.54097
TC2200009347.hg.1	ANKRD54	ankyrin repeat domain 54	ENSG00000100124	129138	TRUE	0.316083	7.18039	3.09316	0.00556705	0.128979	-2.54421
TC0800009444.hg.1	DEFA5	defensin alpha 5	ENSG00000164816	1670	TRUE	-0.402928	4.57736	-3.0929	0.00557037	0.128979	-2.54477
TC0600009350.hg.1	RNF217	ring finger protein 217	ENSG00000146373	154214	FALSE	-0.296823	7.31485	-3.0925	0.0055755	0.128979	-2.54563
TC1700011020.hg.1	GIP	gastric inhibitory polypeptide	ENSG00000159224	2695	FALSE	-0.620215	4.07015	-3.09212	0.00558029	0.128979	-2.54644
TC1700012240.hg.1	TBC1D3L	TBC1 domain family member 3L	ENSG00000274512	101060376	TRUE	-0.39157	6.89952	-3.08974	0.00561083	0.12951	-2.55157
TC0200011901.hg.1	PUM2	pumilio RNA binding family member 2	ENSG00000055917	23369	FALSE	0.309964	8.15913	3.08909	0.00561931	0.129532	-2.55299
TC1100007049.hg.1	HTATIP2	HIV-1 Tat interactive protein 2	ENSG00000109854	10553	FALSE	-0.48845	4.33301	-3.08733	0.00564191	0.129613	-2.55677
TC0100013417.hg.1	SLC9A1	solute carrier family 9 member A1	ENSG00000090020	6548	FALSE	-0.306173	7.57637	-3.08717	0.00564409	0.129613	-2.55713
TC1200010601.hg.1	FKBP11	FKBP prolyl isomerase 11	ENSG00000134285	51303	TRUE	-0.290035	8.05053	-3.08705	0.00564555	0.129613	-2.55737
TC1400007495.hg.1	PLEKHH1	pleckstrin homology, MyTH4 and FERM domain containing H1	ENSG00000054690	57475	FALSE	0.284943	7.53035	3.08492	0.00567316	0.129912	-2.56196
TC1700009535.hg.1	CHRNE	cholinergic receptor nicotinic epsilon subunit	ENSG00000108556	1145	FALSE	-0.558831	4.65677	-3.08404	0.00568472	0.129912	-2.56387
TC0100009408.hg.1	PIFO	primary cilia formation	ENSG00000173947	128344	FALSE	0.326077	7.5155	3.08347	0.0056921	0.129912	-2.56509
TC1200007182.hg.1	FAR2	fatty acyl-CoA reductase 2	ENSG00000064763	55711	FALSE	0.413737	5.77709	3.0833	0.00569437	0.129912	-2.56547
TC1600009677.hg.1	CRYM	crystallin mu	ENSG00000103316	1428	FALSE	-0.227156	8.81233	-3.08305	0.00569759	0.129912	-2.566
TC1800007220.hg.1	RNF165	ring finger protein 165	ENSG00000141622	494470	FALSE	0.555374	5.09252	3.08255	0.00570408	0.129912	-2.56707
TC0600011579.hg.1	GRM4	glutamate metabotropic receptor 4	ENSG00000124493	2914	FALSE	0.401325	4.97134	3.0795	0.00574414	0.130552	-2.57365
TC0200011022.hg.1	SP140L	SP140 nuclear body protein like	ENSG00000185404	93349	FALSE	-0.415565	6.11629	-3.07894	0.00575151	0.130552	-2.57485
TC1200007992.hg.1	SRGAP1	SLIT-ROBO Rho GTPase activating protein 1	ENSG00000196935	57522	FALSE	0.277546	8.74992	3.07867	0.00575505	0.130552	-2.57543
TC0300008130.hg.1	COL8A1	collagen type VIII alpha 1 chain	ENSG00000144810	1295	FALSE	-0.375164	6.86443	-3.07379	0.00581976	0.131687	-2.58594
TC0200009626.hg.1	LYPD6	LY6/PLAUR domain containing 6	ENSG00000187123	130574	FALSE	-0.270761	7.24424	-3.07373	0.00582048	0.131687	-2.58606
TC1900008103.hg.1	PLD3	phospholipase D family member 3	ENSG00000105223	23646	FALSE	0.200215	9.21366	3.07229	0.00583968	0.131906	-2.58915
TC0300009713.hg.1	EPHB3	EPH receptor B3	ENSG00000182580	2049	FALSE	-0.316891	7.92681	-3.07186	0.00584553	0.131906	-2.5901
TC0500010766.hg.1	PLPP1	phospholipid phosphatase 1	ENSG00000067113	8611	TRUE	0.218406	8.38827	3.07067	0.00586147	0.132091	-2.59266
TC1700012093.hg.1	FASN	fatty acid synthase	ENSG00000169710	2194	FALSE	0.194635	9.40405	3.0685	0.00589062	0.13257	-2.59732
TC1200008615.hg.1	MYBPC1	myosin binding protein C1	ENSG00000196091	4604	FALSE	-0.581714	4.61101	-3.06793	0.00589834	0.13257	-2.59855
TC1600007999.hg.1	CX3CL1	C-X3-C motif chemokine ligand 1	ENSG00000006210	6376	FALSE	0.476326	6.577	3.06737	0.00590594	0.13257	-2.59976
TC0200015616.hg.1	ERBB4	erb-b2 receptor tyrosine kinase 4	ENSG00000178568	2066	FALSE	0.302743	8.10926	3.06665	0.00591568	0.132615	-2.6013
TC1200007538.hg.1	WNT1	Wnt family member 1	ENSG00000125084	7471	FALSE	-0.489517	6.50808	-3.06551	0.00593105	0.132786	-2.60374
TC0X00010880.hg.1	MOSPD1	motile sperm domain containing 1	ENSG00000101928	56180	FALSE	-0.468991	5.75031	-3.06466	0.00594266	0.132872	-2.60558
TC0400008725.hg.1	PCDH10	protocadherin 10	ENSG00000138650	57575	FALSE	0.242587	7.70646	3.06222	0.00597585	0.133278	-2.61081
TC0700009386.hg.1	TMEM178B	transmembrane protein 178B	ENSG00000261115	100507421	FALSE	0.354077	7.55561	3.06218	0.00597638	0.133278	-2.6109
TC1900011786.hg.1	NR1H2	nuclear receptor subfamily 1 group H member 2	ENSG00000131408	7376	FALSE	-0.242758	6.47209	-3.05913	0.00601826	0.134037	-2.61746
TC1700009043.hg.1	BIRC5	baculoviral IAP repeat containing 5	ENSG00000089685	332	FALSE	0.331538	7.05153	3.05783	0.00603613	0.134261	-2.62024
TC1600011221.hg.1	MVD	mevalonate diphosphate decarboxylase	ENSG00000167508	4597	FALSE	0.299135	7.6605	3.05576	0.00606482	0.134631	-2.62469
TC0200015971.hg.1	SLC16A14	solute carrier family 16 member 14	ENSG00000163053	151473	FALSE	0.271889	6.78562	3.05519	0.00607278	0.134631	-2.62593
TC1400009151.hg.1	TRIM9	tripartite motif containing 9	ENSG00000100505	114088	FALSE	-0.304422	9.29345	-3.05493	0.00607636	0.134631	-2.62648
TC0400012990.hg.1	DDX60L	DExD/H-box 60 like	ENSG00000181381	91351	FALSE	-0.455725	6.13241	-3.05351	0.00609617	0.134896	-2.62954
TC1000012580.hg.1	ARHGAP19	Rho GTPase activating protein 19	ENSG00000213390	84986	FALSE	0.238289	8.56507	3.05136	0.00612621	0.135366	-2.63415
TC1700007408.hg.1	PIPOX	pipecolic acid and sarcosine oxidase	ENSG00000179761	51268	FALSE	0.258052	8.08483	3.05085	0.00613323	0.135366	-2.63523
TC1700008175.hg.1	CALCOCO2	calcium binding and coiled-coil domain 2	ENSG00000136436	10241	FALSE	-0.241053	6.99957	-3.05001	0.00614507	0.135369	-2.63704
TC0200016494.hg.1	CNNM4	cyclin and CBS domain divalent metal cation transport mediator 4	ENSG00000158158	26504	FALSE	-0.290993	7.23514	-3.04951	0.00615212	0.135369	-2.63811
TC0200008071.hg.1	MTHFD2	methylenetetrahydrofolate dehydrogenase (NADP+ dependent) 2, methenyltetrahydrofolate cyclohydrolase	ENSG00000065911	10797	FALSE	-0.424227	6.17819	-3.04915	0.0061571	0.135369	-2.63887
TC2200009365.hg.1	CHKB	choline kinase beta	ENSG00000100288	1120	FALSE	0.188564	8.20935	3.04526	0.0062122	0.136314	-2.64724
TC0300012504.hg.1	KY	kyphoscoliosis peptidase	ENSG00000174611	339855	FALSE	0.320582	6.65583	3.04499	0.00621601	0.136314	-2.64781
TC0700013595.hg.1	SPACDR	sperm acrosome developmental regulator	ENSG00000185955	402573	FALSE	0.319239	5.92516	3.04423	0.00622682	0.136377	-2.64944
TC0600010864.hg.1	RANBP9	RAN binding protein 9	ENSG00000010017	10048	FALSE	-0.194087	10.7173	-3.04137	0.00626761	0.137019	-2.65557
TC0300008989.hg.1	SLC25A36	solute carrier family 25 member 36	ENSG00000114120	55186	FALSE	-0.250416	10.0897	-3.04105	0.00627212	0.137019	-2.65625
TC1700011566.hg.1	FAM20A	FAM20A golgi associated secretory pathway pseudokinase	ENSG00000108950	54757	FALSE	0.389503	4.2979	3.03838	0.00631048	0.137681	-2.66197
TC0300011454.hg.1	LMOD3	leiomodin 3	ENSG00000163380	56203	FALSE	0.363624	4.34599	3.03724	0.00632703	0.137866	-2.66443
TC0500013351.hg.1	FNIP1	folliculin interacting protein 1	ENSG00000217128	96459	FALSE	-0.27716	8.29262	-3.03513	0.00635759	0.138356	-2.66895
TC2200009271.hg.1	APOBEC3C	apolipoprotein B mRNA editing enzyme catalytic subunit 3C	ENSG00000244509	27350	FALSE	-0.324423	6.97203	-3.03447	0.00636718	0.138389	-2.67037
TC0800007439.hg.1	POLB	DNA polymerase beta	ENSG00000070501	5423	FALSE	0.215527	8.33197	3.03261	0.00639416	0.138799	-2.67433
TC0300008017.hg.1	ZNF654	zinc finger protein 654	ENSG00000175105	55279	FALSE	-0.322425	6.7096	-3.03197	0.00640361	0.138829	-2.67572
TC0100008100.hg.1	ARMH1	armadillo like helical domain containing 1	ENSG00000198520	339541	FALSE	0.39975	5.96809	3.02803	0.00646136	0.139474	-2.68414
TC0200016717.hg.1	TBC1D8	TBC1 domain family member 8	ENSG00000204634	11138	FALSE	0.376676	5.26007	3.02788	0.00646359	0.139474	-2.68446
TC0900008587.hg.1	TLR4	toll like receptor 4	ENSG00000136869	7099	FALSE	-0.351095	5.99909	-3.02765	0.00646703	0.139474	-2.68496
TC1500010236.hg.1	GOLGA6L10	golgin A6 family like 10	ENSG00000278662	647042	TRUE	0.363089	5.81861	3.02739	0.00647089	0.139474	-2.68552
TC0300013973.hg.1	CELSR3	cadherin EGF LAG seven-pass G-type receptor 3	ENSG00000008300	1951	TRUE	0.334021	6.70861	3.02717	0.00647409	0.139474	-2.68599
TC1400007566.hg.1	SMOC1	SPARC related modular calcium binding 1	ENSG00000198732	64093	FALSE	0.144207	11.5912	3.02452	0.00651336	0.139808	-2.69166
TC1100013138.hg.1	RRP8	ribosomal RNA processing 8	ENSG00000132275	23378	FALSE	-0.211098	7.18659	-3.02403	0.00652057	0.139808	-2.6927
TC0900008953.hg.1	ASS1	argininosuccinate synthase 1	ENSG00000130707	445	FALSE	-0.182334	10.067	-3.02347	0.00652892	0.139808	-2.6939
TC0400012945.hg.1	HSD17B11	hydroxysteroid 17-beta dehydrogenase 11	ENSG00000198189	51170	FALSE	-0.224429	8.42457	-3.02347	0.00652901	0.139808	-2.69391
TC0600013762.hg.1	TCP1	t-complex 1	ENSG00000120438	6950	TRUE	0.175868	9.12994	3.02337	0.00653041	0.139808	-2.69411
TC1400009839.hg.1	STON2	stonin 2	ENSG00000140022	85439	FALSE	-0.281692	8.63597	-3.02064	0.00657119	0.140505	-2.69995
TC0700008657.hg.1	LRRC17	leucine rich repeat containing 17	ENSG00000128606	10234	FALSE	-0.222937	8.36591	-3.01973	0.0065848	0.140604	-2.70189
TC0600013883.hg.1	MPC1	mitochondrial pyruvate carrier 1	ENSG00000060762	51660	FALSE	0.189614	10.1681	3.01924	0.0065922	0.140604	-2.70294
TC0100016218.hg.1	RGS5	regulator of G protein signaling 5	ENSG00000143248	8490	TRUE	0.338143	8.76325	3.01744	0.00661931	0.141006	-2.70679
TC1100011901.hg.1	NOX4	NADPH oxidase 4	ENSG00000086991	50507	FALSE	-0.482018	5.6817	-3.01521	0.00665312	0.141502	-2.71157
TC0500009046.hg.1	ADRB2	adrenoceptor beta 2	ENSG00000169252	154	FALSE	0.401315	5.22654	3.01481	0.0066591	0.141502	-2.71241
TC0600011392.hg.1	SFTA2	surfactant associated 2	ENSG00000196260	389376	TRUE	0.403004	4.52451	3.01176	0.00670566	0.142314	-2.71894
TC1900010743.hg.1	TGFB1	transforming growth factor beta 1	ENSG00000105329	7040	FALSE	-0.259644	6.63651	-3.0096	0.00673873	0.142839	-2.72355
TC0100010389.hg.1	HSD17B7	hydroxysteroid 17-beta dehydrogenase 7	ENSG00000132196	51478	FALSE	0.33403	7.70252	3.00827	0.00675906	0.143093	-2.72638
TC0400012102.hg.1	LRBA	LPS responsive beige-like anchor protein	ENSG00000198589	987	FALSE	-0.331518	8.36539	-3.00476	0.00681338	0.143676	-2.73388
TC1600007392.hg.1	SNX29P2	sorting nexin 29 pseudogene 2		440352	TRUE	-0.379198	6.03247	-3.00451	0.00681723	0.143676	-2.73441
TC0100017716.hg.1	FAM89A	family with sequence similarity 89 member A	ENSG00000182118	375061	TRUE	0.607407	4.2079	3.00392	0.00682635	0.143676	-2.73566
TC0700011799.hg.1	HEPACAM2	HEPACAM family member 2	ENSG00000188175	253012	FALSE	0.739107	3.7392	3.00392	0.0068264	0.143676	-2.73567
TC0600007257.hg.1	TRIM38	tripartite motif containing 38	ENSG00000112343	10475	FALSE	-0.639641	3.74581	-3.00303	0.0068402	0.143676	-2.73756
TC0500008875.hg.1	PCDHB2	protocadherin beta 2	ENSG00000112852	56133	FALSE	-0.339716	7.39179	-3.00284	0.00684326	0.143676	-2.73798
TC0300008324.hg.1	PHLDB2	pleckstrin homology like domain family B member 2	ENSG00000144824	90102	TRUE	-0.532141	4.85035	-3.00231	0.00685152	0.143676	-2.73911
TC1100011744.hg.1	GAB2	GRB2 associated binding protein 2	ENSG00000033327	9846	FALSE	-0.418167	6.26708	-3.00194	0.00685731	0.143676	-2.7399
TC1800006882.hg.1	CABLES1	Cdk5 and Abl enzyme substrate 1	ENSG00000134508	91768	FALSE	0.456147	6.67874	3.00163	0.00686208	0.143676	-2.74056
[truncated: 16,309 more rows]

## Sheet: Diff in Control
PROBEID	SYMBOL	GENENAME	ENSEMBL	ENTREZID	duplicate.annotation	logFC	AveExpr	t	P.Value	adj.P.Val	B
[truncated: 17,127 more rows]

[truncated: 1 more sheets: Diff in 4707]
